# Supplementary material for: An unexpected photoinduced cyclization to synthesize fully substituted γ-spirolactones via intramolecular hydrogen abstraction with allyl acrylates
Source: Royal Society of Chemistry journal article supplement (doi:10.1039/d1qo01952j), 2022-01-01

## Supporting Information

### An Unexpected Photoinduced Cyclization to Synthesize Fully Substituted $\gamma$ -Spirolactones via Intramolecular Hydrogen Abstraction with Allyl Acrylates

Xin Sun,<sup>b,c</sup> Min Zhou,<sup>c</sup> Jing-Ping Zhu,<sup>b</sup> Xiang-Fei Zhang,<sup>b</sup> Zu-Jiang Liu,<sup>b</sup> Hao-Ran Li,<sup>b</sup> Yan Chen,<sup>b</sup> He-Ping Chen,<sup>a</sup> Jie Zhao,<sup>c</sup> Jian-Xin Pu,<sup>c</sup> Miao Yu,<sup>\*,b</sup> Ji-Kai Liu<sup>\*,a</sup> and Bin Wu<sup>\*,a</sup>

<sup>a</sup>School of Pharmaceutical Sciences, South-Central University for Nationalities, Wuhan 430074, China

<sup>b</sup>School of Chemistry and Pharmaceutical Engineering, Huanghuai University, Zhumadian 463000, China

<sup>c</sup>State Key Laboratory of Phytochemistry and Plant Resources in West China, Kunming Institute of Botany, Chinese Academy of Sciences, Kunming 650201, China

### Contents of Supporting Information

Page **S1**: Title of the paper, author's name, and address along with the contents

Page **S2**: Experimental section

Page **S3**: Original UV absorption spectra of **8a**, **8p** and **8t** in MeOH and MeCN

Page **S3-S6**: Screening the optimal reaction conditions with **8a**

Page **S7**: Structurally similar unreactive substrates

Page **S7-S9**: Deuterium Experiments

Page **S9**: Computational Studies. DFT study of *sequence a* (**Path 1**)

Page **S10-S26**: Computational Studies. DFT study of *sequence b* (**Path 2, 3** and **4**)

Page **S27-S52**: Preparation and NMR data of allyl acrylic esters **8**

Page **S53**: References

Page **S53-S74**: Preparation and NMR data of spirolactone products **9**

Page **S74-S117**: x-ray data of ( $\pm$ )-**9f'**, ( $\pm$ )-**9j'** and ( $\pm$ )-**9j**

Page **S118-S200**: <sup>1</sup>H NMR, <sup>13</sup>C NMR, <sup>19</sup>F NMR and <sup>31</sup>P NMR spectra of compounds

## Experiment Section.

1. NMR spectra were recorded on Bruker DPX-400, DRX-600 and Bruker Ascend IITM 600 MHz NMR spectrometer instruments and calibrated using residual solvent peaks as internal reference, such as  $\text{CDCl}_3$  solutions. High resolution mass spectra were performed on API STAR Pulsar and Thermo Q Exactive. TLC analyses were performed on commercial glass plates bearing 0.25-mm layer of Merck Silica gel 60F<sub>254</sub>. Silica gel (Wakogel 300 - 400 mesh) was used for column chromatography. The photo-promoted reactions were run in Perfectlight PLMR Low Temperature Photosynthetic System (Instrument model : PLMR254-XXYY; Low Voltage Mercury Lamp Source, Main Wave Peak 254 nm, Electric Power 8-40W Optional, Low Voltage Mercury Lamp , AC 220 Regulator).

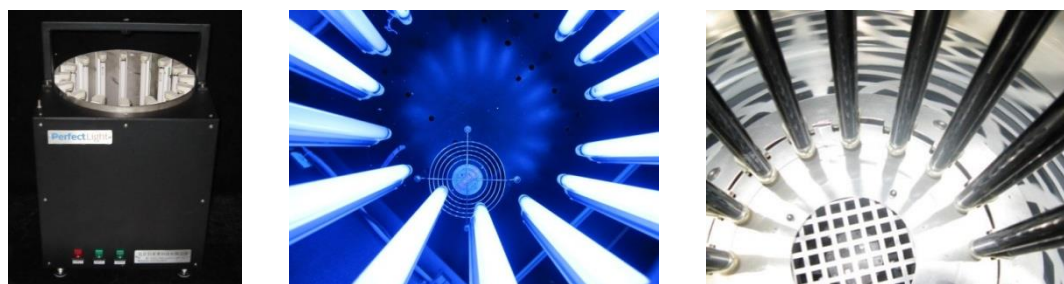

Figure S1. Photos of Photosynthetic reactor

**2.Reagent:** Unless otherwise noted, materials obtained from commercial suppliers were used without further purification. Unsaturated ketenes were purchased from Accela ChemBio Co., Ltd and Shanghai Titan Scientific Co., Ltd.. Cinnamic acids were purchased from Energy-Chemical Co., Ltd.. Other reagents were purchased from Thermo Fisher Scientific Co., Ltd. and Shanghai Aladdin Biochemical Technology Co., Ltd.. Solvents were purchased from Shanghai Titan Scientific Co., Ltd. and Thermo Fisher Scientific Co., Ltd..

All reactions were carried out under  $\text{N}_2$  atmosphere.

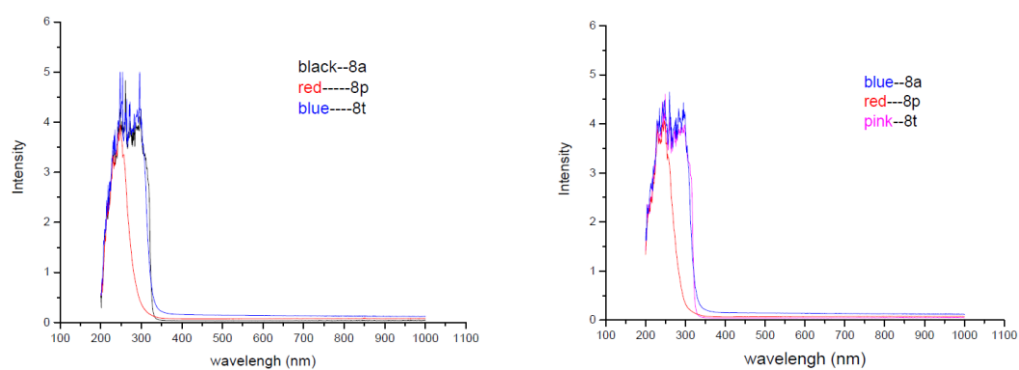

**Figure S2.** Original UV absorption spectra of **8a**, **8p** and **8t** in MeOH (left); Original UV absorption spectra of **8a**, **8p** and **8t** in MeCN (right)

**Table S1.** Screening for the optimal reaction conditions with **8a** <sup>a</sup>.

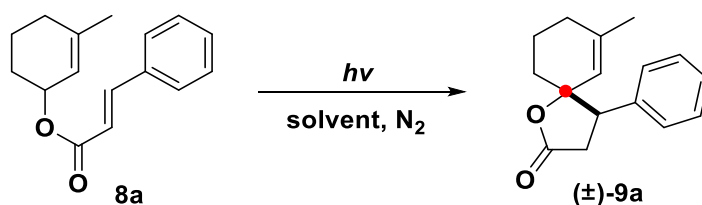

| entry           | solvent                         | $\lambda$<br>(nm) | additive<br>(equiv.) | temp.<br>(°C) | time<br>(h) | conv.<br>(%) | yield<br>(%) <sup>b</sup> |
|-----------------|---------------------------------|-------------------|----------------------|---------------|-------------|--------------|---------------------------|
| 1               | MeCN                            | 254               | -                    | r.t.          | 31          | 100          | 36                        |
| 2               | MeOH                            | 254               | -                    | r.t.          | 34          | 100          | 46                        |
| 3               | EtOH                            | 254               | -                    | r.t.          | 35          | 100          | 30                        |
| 4               | <sup>n</sup> PrOH               | 254               | -                    | r.t.          | 38          | 100          | 20                        |
| 5 <sup>c</sup>  | TFE                             | 254               | -                    | r.t.          | 12          | 100          | 8                         |
| 6 <sup>d</sup>  | HFIP                            | 254               | -                    | r.t.          | 4           | 100          | trace                     |
| 7               | CH <sub>2</sub> Cl <sub>2</sub> | 254               | -                    | r.t.          | 6           | 100          | 10                        |
| 8               | DCE                             | 254               | -                    | r.t.          | 10          | 100          | trace                     |
| 9               | toluene                         | 254               | -                    | r.t.          | 16          | 100          | 9                         |
| 10              | PhCF <sub>3</sub>               | 254               | -                    | r.t.          | 10          | 100          | 10                        |
| 11              | PhF                             | 254               | -                    | r.t.          | 12          | 100          | 8                         |
| 12              | PhCl                            | 254               | -                    | r.t.          | 12          | 100          | 6                         |
| 13              | THF                             | 254               | -                    | r.t.          | 6           | 100          | trace                     |
| 14              | 2-MeTHF                         | 254               | -                    | r.t.          | 9           | 100          | trace                     |
| 15 <sup>e</sup> | CPME                            | 254               | -                    | r.t.          | 8.5         | 100          | trace                     |
| 16              | 1,4-dioxane                     | 254               | -                    | r.t.          | 12          | 100          | 6                         |
| 17 <sup>f</sup> | DME                             | 254               | -                    | r.t.          | 3           | 100          | 0                         |
| 18              | butyl ether                     | 254               | -                    | r.t.          | 14          | 100          | 8                         |
| 19              | Acetone                         | 254               | -                    | r.t.          | 6           | 100          | trace                     |

|                 |               |             |          |      |    |       |       |
|-----------------|---------------|-------------|----------|------|----|-------|-------|
| 20              | ethyl acetate | 254         | -        | r.t. | 4  | 100   | 0     |
| 21              | DMF           | 254         | -        | r.t. | 12 | 100   | 0     |
| 22              | DMSO          | 254         | -        | r.t. | 12 | 100   | 0     |
| 23              | MeOH          | 185         | -        | r.t. | 26 | 100   | 36    |
| 24              | MeOH          | 310         | -        | r.t. | 34 | 100   | 36    |
| 25              | MeOH          | 365         | -        | r.t. | 35 | 100   | 38    |
| 26 <sup>g</sup> | MeOH          | blue LEDs   | -        | r.t. | 24 | trace | 0     |
| 27 <sup>h</sup> | MeOH          | purple LEDs | -        | r.t. | 24 | trace | trace |
| 28              | MeOH          | 254         | PhSSPh   | r.t. | 24 | 100   | 4     |
| 29              | MeOH          | 254         | PhSeSePh | r.t. | 12 | 100   | trace |
| 30 <sup>i</sup> | MeOH          | 254         | TBADT    | r.t. | 12 | 100   | trace |
| 31              | MeOH          | sunlight    | TBADT    | r.t. | 12 | trace | trace |
| 32              | MeOH          | 254         | AIBN     | r.t. | 12 | 100   | 10    |
| 33              | MeOH          | 254         | DTBP     | r.t. | 12 | 100   | 5     |
| 34              | MeOH          | 254         | TBHP     | r.t. | 12 | 100   | trace |
| 35 <sup>j</sup> | MeOH          | 254         | DLP      | r.t. | 12 | 100   | 9     |
| 37              | MeOH          | 254         | TBPB     | r.t. | 12 | 100   | 10    |
| 38 <sup>k</sup> | MeOH          | 254         | TEMPO    | r.t. | 12 | 100   | 26    |
| 39              | MeOH          | 254         | -        | 0    | 48 | 100   | 33    |
| 40 <sup>l</sup> | MeOH          | 254         | -        | r.t. | 34 | 100   | 40    |
| 41 <sup>m</sup> | MeOH          | 254         | -        | r.t. | 34 | 100   | 43    |

<sup>a</sup> typical reaction conditions: **8a** (0.1 mmol),  $h\nu$  (254 nm), solvent (10 mL), N<sub>2</sub>, rt;

<sup>b</sup> isolated yield; <sup>c</sup>TFE: 2,2,2-trifluoroethanol; <sup>d</sup>HFIP: 1,1,1,3,3,3-hexafluoro-2-propanol; <sup>e</sup>CPME: cyclopentyl methyl ether; <sup>f</sup>DME: 1,2-dimethoxyethane; <sup>g</sup>( $\lambda$ = 455-460 nm, 60W); <sup>h</sup>( $\lambda$ = 405-410 nm, 60W); <sup>i</sup>TBADT tetrabutylammonium decatungstate; <sup>j</sup>DLP: dilauroyl peroxide; <sup>k</sup>TEMPO: 2,2,6,6-tetramethylpiperidinoxy <sup>l</sup> the reaction was run at 0.1M; <sup>m</sup> the reaction was run at 0.05M.

**Table S2.** Screening for the optimal reaction conditions of **8a** in the presence of organic photosensitizer <sup>a</sup>

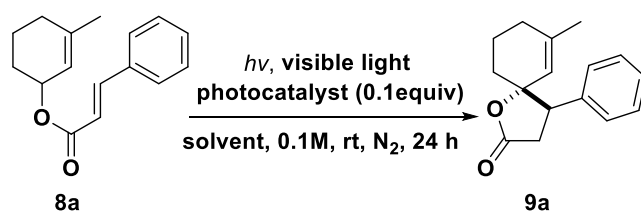

| entry | Solvent            | Photocatalyst         | nm      | conversion | yield <sup>b</sup> |
|-------|--------------------|-----------------------|---------|------------|--------------------|
| 1     | CH <sub>3</sub> OH | 9-Fluorenone          | 400     | trace      | 0                  |
| 2     | CH <sub>3</sub> CN | 9-Fluorenone          | 400     | trace      | 0                  |
| 3     | CH <sub>3</sub> OH | 2-Bromo-9-fluorenone  | 400     | 30         | 0                  |
| 4     | CH <sub>3</sub> CN | 2-Bromo-9-fluorenone  | 400     | 20         | 0                  |
| 5     | CH <sub>3</sub> OH | Benzil                | 400-435 | trace      | 0                  |
| 6     | CH <sub>3</sub> CN | Benzil                | 400-435 | trace      | 0                  |
| 7     | CH <sub>3</sub> OH | Methyl benzoylformate | 400     | <5         | 0                  |
| 8     | CH <sub>3</sub> CN | Methyl benzoylformate | 400     | <5         | 0                  |

|           |                    |                                                    |         |       |   |
|-----------|--------------------|----------------------------------------------------|---------|-------|---|
| <b>9</b>  | CH <sub>3</sub> OH | 5-Dibenzosuberone                                  | 400     | trace | 0 |
| <b>10</b> | CH <sub>3</sub> CN | 5-Dibenzosuberone                                  | 400     | trace | 0 |
| <b>11</b> | CH <sub>3</sub> OH | 2-Chlorothioxanthone                               | 400     | 50    | 0 |
| <b>12</b> | CH <sub>3</sub> CN | 2-Chlorothioxanthone                               | 400     | 70    | 0 |
| <b>13</b> | CH <sub>3</sub> OH | Phenanthrenequinone                                | 400     | <10   | 0 |
| <b>14</b> | CH <sub>3</sub> CN | Phenanthrenequinone                                | 400     | <10   | 0 |
| <b>15</b> | CH <sub>3</sub> OH | Benzil                                             | 400     | 40    | 0 |
| <b>16</b> | CH <sub>3</sub> CN | Benzil                                             | 400     | <30   | 0 |
| <b>17</b> | CH <sub>3</sub> OH | 2,3-Butanedione                                    | 400     | <20   | 0 |
| <b>18</b> | CH <sub>3</sub> CN | 2,3-Butanedione                                    | 400     | <10   | 0 |
| <b>19</b> | CH <sub>3</sub> OH | 2,7-Dibromo-9H-fluoren-9-one                       | 400     | <30   | 0 |
| <b>20</b> | CH <sub>3</sub> CN | 2,7-Dibromo-9H-fluoren-9-one                       | 400     | <30   | 0 |
| <b>21</b> | CH <sub>3</sub> OH | 3,6-Dibromo-fluoren-9-one                          | 400     | <20   | 0 |
| <b>22</b> | CH <sub>3</sub> CN | 3,6-Dibromo-fluoren-9-one                          | 400     | <20   | 0 |
| <b>23</b> | CH <sub>3</sub> OH | 1,8-Diazafluoran-9-one                             | 400     | trace | 0 |
| <b>24</b> | CH <sub>3</sub> CN | 1,8-Diazafluoran-9-one                             | 400     | trace | 0 |
| <b>25</b> | CH <sub>3</sub> OH | Solvent Red 43                                     | 400     | <10   | 0 |
| <b>26</b> | CH <sub>3</sub> CN | Solvent Red 43                                     | 400     | <10   | 0 |
| <b>27</b> | CH <sub>3</sub> OH | 4-Bromo-9H-fluoren-9-one                           | 400     | 90    | 0 |
| <b>28</b> | CH <sub>3</sub> CN | 4-Bromo-9H-fluoren-9-one                           | 400     | <20   | 0 |
| <b>29</b> | CH <sub>3</sub> OH | 5,9-dibromo-7H-benzo<br>[c]fluoren-7-one           | 400     | <5    | 0 |
| <b>30</b> | CH <sub>3</sub> CN | 5,9-dibromo-7H-benzo<br>[c]fluoren-7-one           | 400     | 90    | 0 |
| <b>31</b> | CH <sub>3</sub> OH | 4,5-Dibromofluorescein                             | 400     | 80    | 0 |
| <b>32</b> | CH <sub>3</sub> CN | 4,5-Dibromofluorescein                             | 400     | 80    | 0 |
| <b>33</b> | CH <sub>3</sub> OH | 3,6-Dibromo-2,7-diiodo-<br>phenanthrene-9,10-dione | 400-435 | 70    | 0 |
| <b>34</b> | CH <sub>3</sub> CN | 3,6-Dibromo-2,7-diiodo-<br>phenanthrene-9,10-dione | 400-435 | 80    | 0 |
| <b>35</b> | CH <sub>3</sub> OH | 3,6-Dibromo-<br>Phenanthrenequinone                | 400-435 | 80    | 0 |
| <b>36</b> | CH <sub>3</sub> CN | 3,6-Dibromo-<br>phenanthrenequinone                | 400-435 | 80    | 0 |
| <b>37</b> | CH <sub>3</sub> OH | 3,6-Dibromo-2,7-diiodo-<br>phenanthrene-9,10-dione | 400     | >60   | 0 |
| <b>38</b> | CH <sub>3</sub> CN | 3,6-Dibromo-2,7-diiodo-<br>phenanthrene-9,10-dione | 400     | >90   | 0 |
| <b>39</b> | CH <sub>3</sub> OH | 3,6-Dibromo-<br>Phenanthrenequinone                | 400     | >80   | 0 |
| <b>40</b> | CH <sub>3</sub> CN | 3,6-Dibromo-<br>Phenanthrenequinone                | 400     | trace | 0 |

<sup>a</sup> typical reaction conditions: **8a** (0.1 mmol), Photocatalyst (0.1 equiv), *hν* (400 nm), solvent (10 mL), N<sub>2</sub>, rt, 24 h;

<sup>b</sup> NMR yield

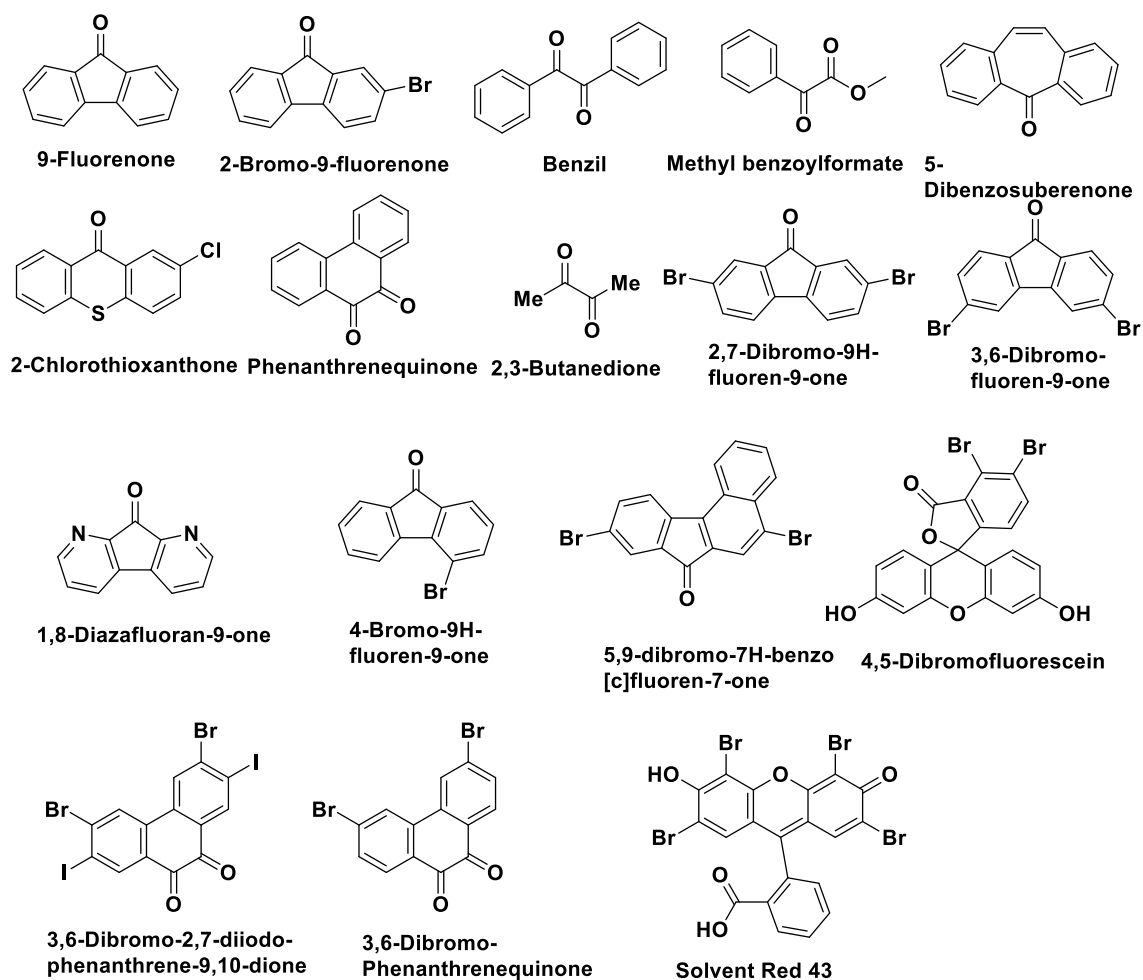

**Scheme S1.** List of organic photocatalyst

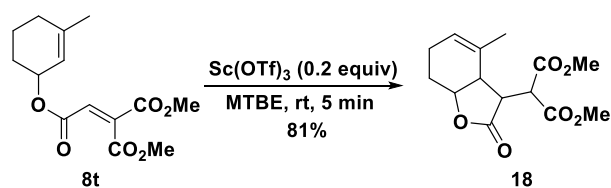

**Figure S3.** [Ref. 16] A Lewis acid-catalyzed intramolecular Michael addition reaction with 8t was carried out as following, which was consistent with the result of Snider, see: Snider, B. B.; Roush, D. M. *J. Org. Chem.*, **1979**, *44*, 4229.

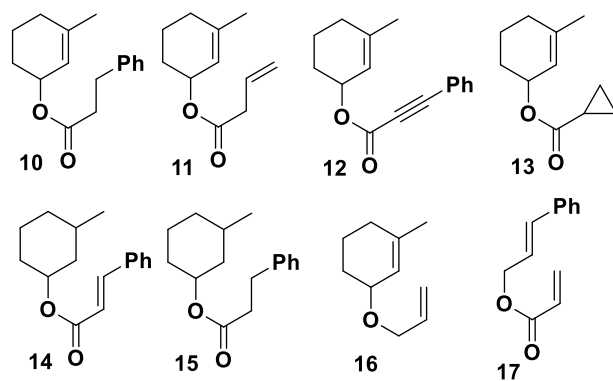

**Figure S4.** Structurally similar unreactive substrates for control experiments.

### Deuterium Experiments

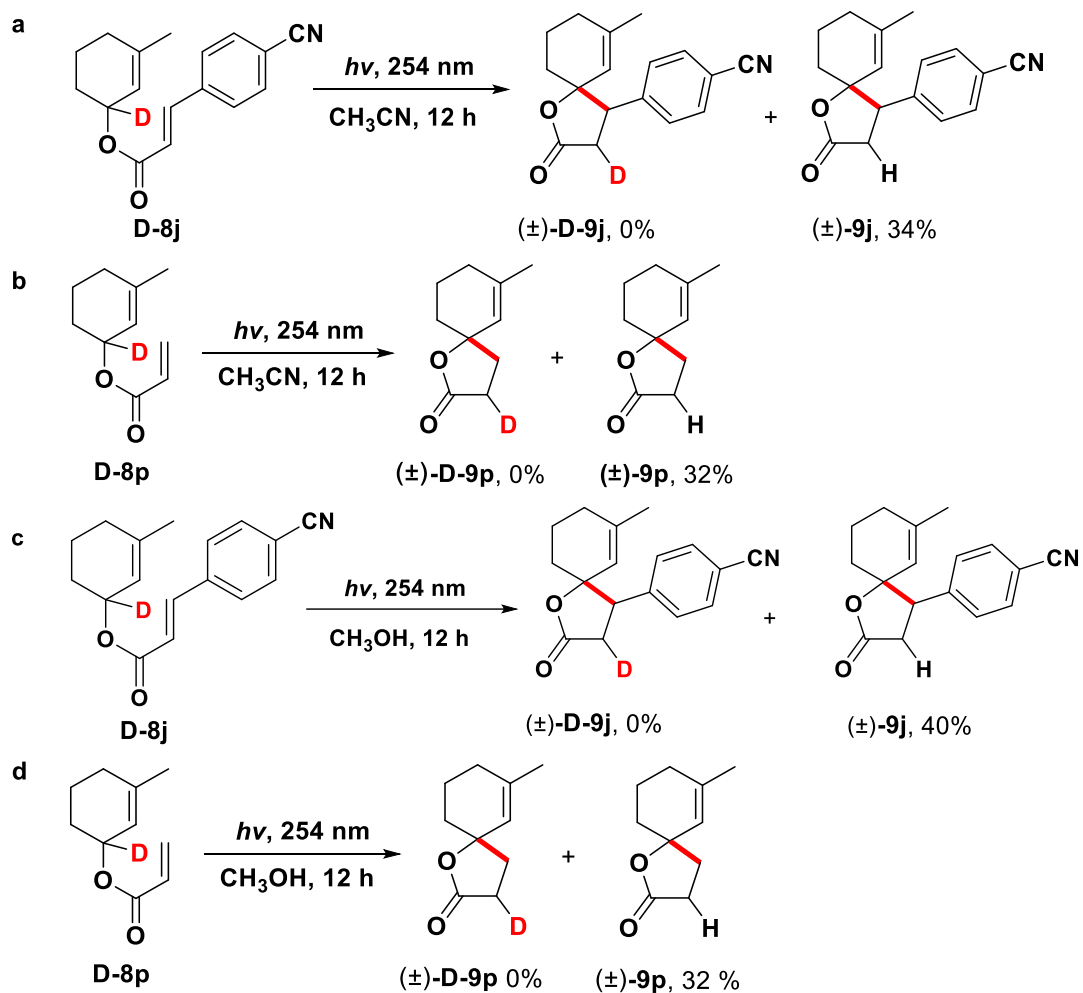

**Figure S5.** Deuterium experiments **D-8j/D-8p** in  $\text{CH}_3\text{OH}/\text{CH}_3\text{CN}$ .

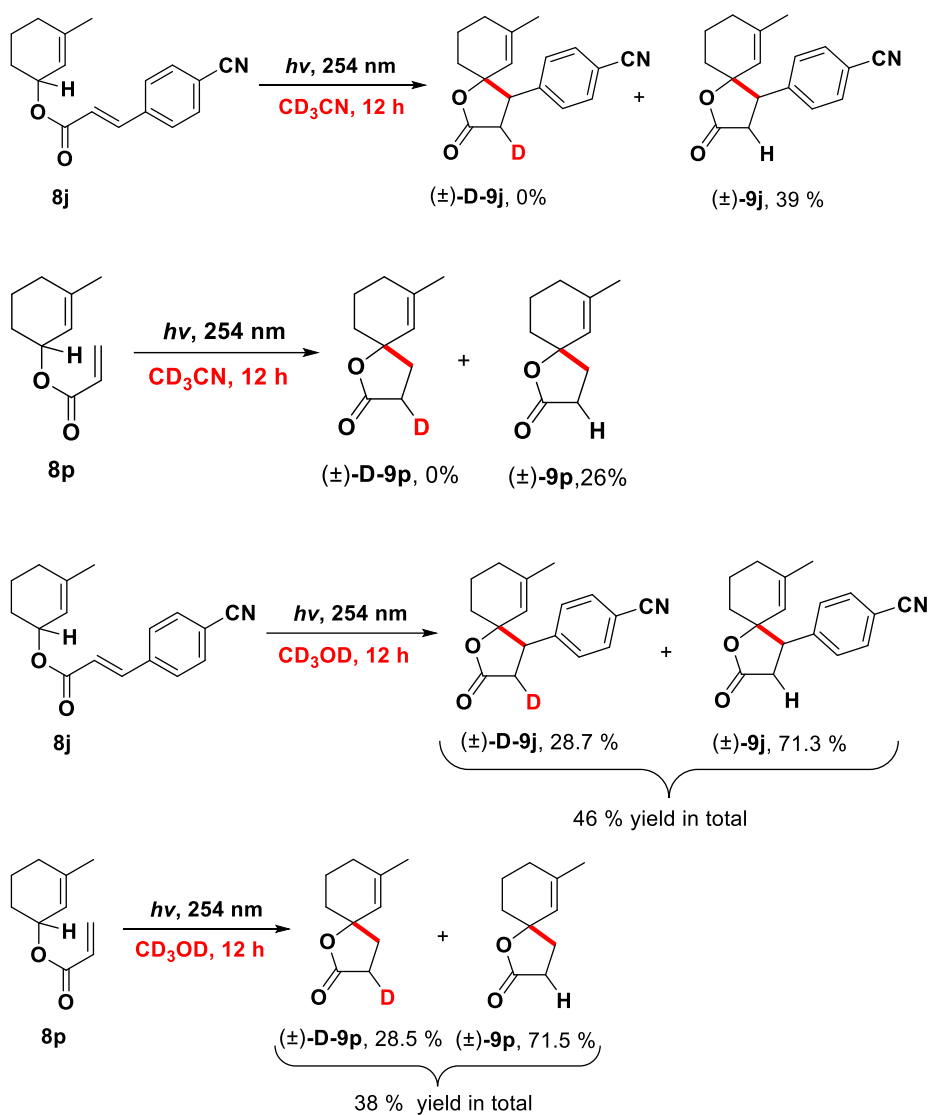

**Figure S6.** Deuterium experiments **8j/8p** in  $\text{CD}_3\text{OD}/\text{CD}_3\text{CN}$ .

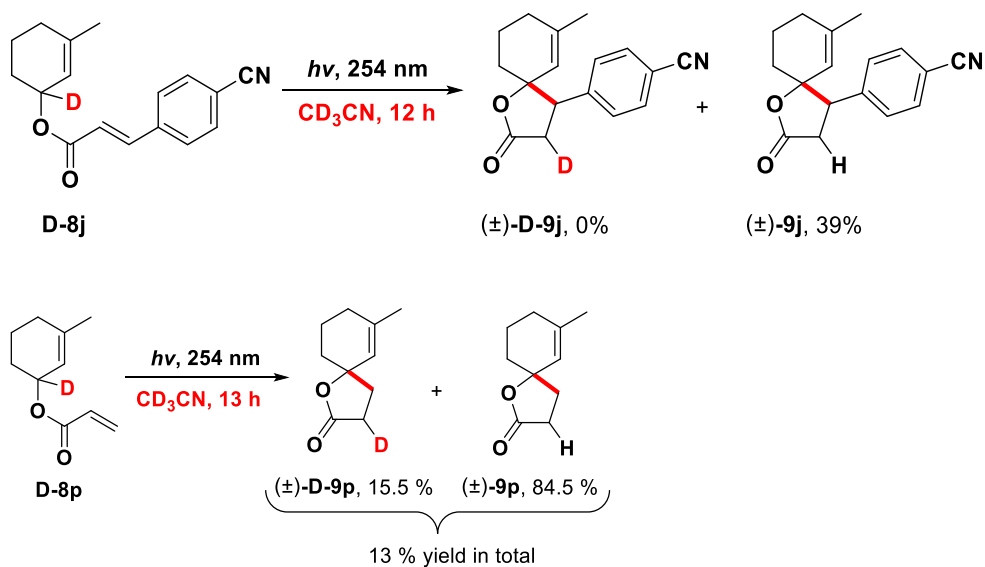



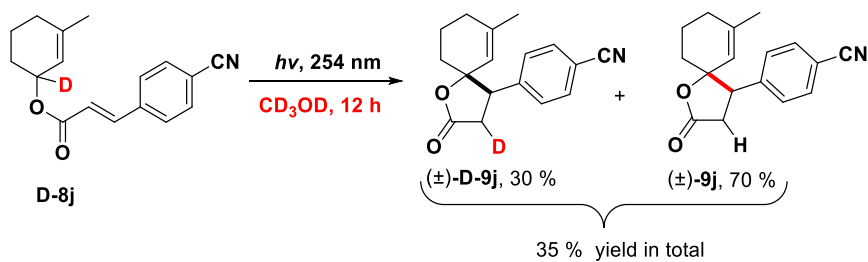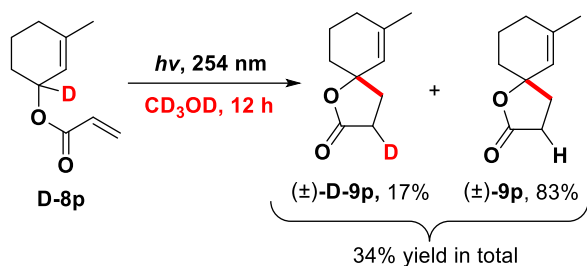

**Figure S7.** Deuterium experiments **D-8j/D-8p** in  $\text{CD}_3\text{OD}/\text{CD}_3\text{CN}$ .

### Computational Studies

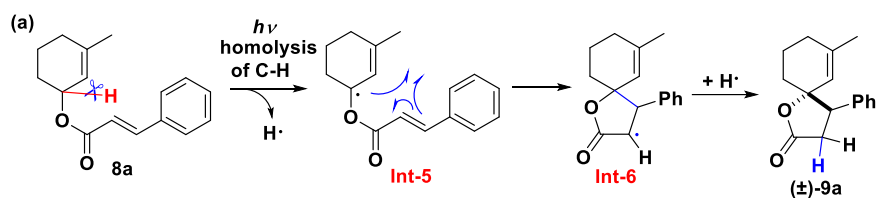

**Figure S8.** Mechanistic investigations: a radical is produced via homolytic bond cleavage (*sequence a*)

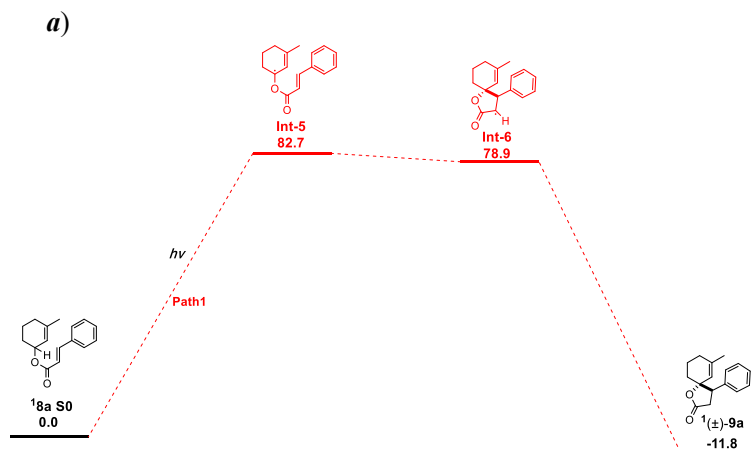

**Figure S9.** DFT (M06-2X/6-311G(d)) computational studies of *sequences a (Path 1)*.

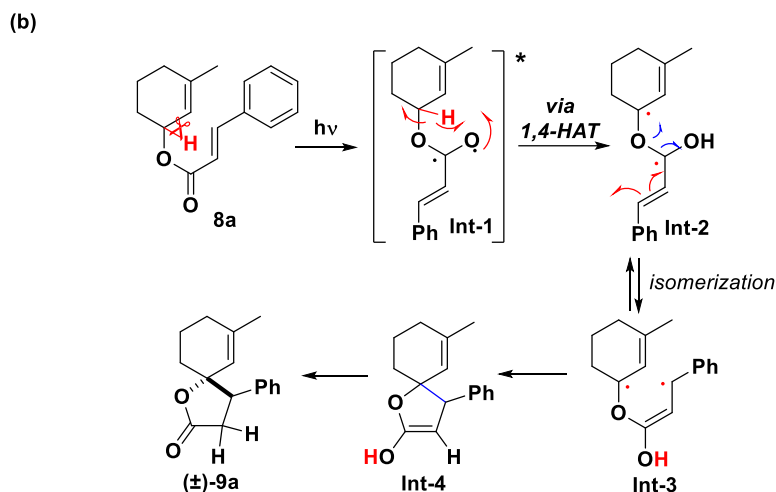

**Figure S10.** Mechanistic investigations: a radical is produced via intramolecular hydrogen abstraction (*sequence b*)

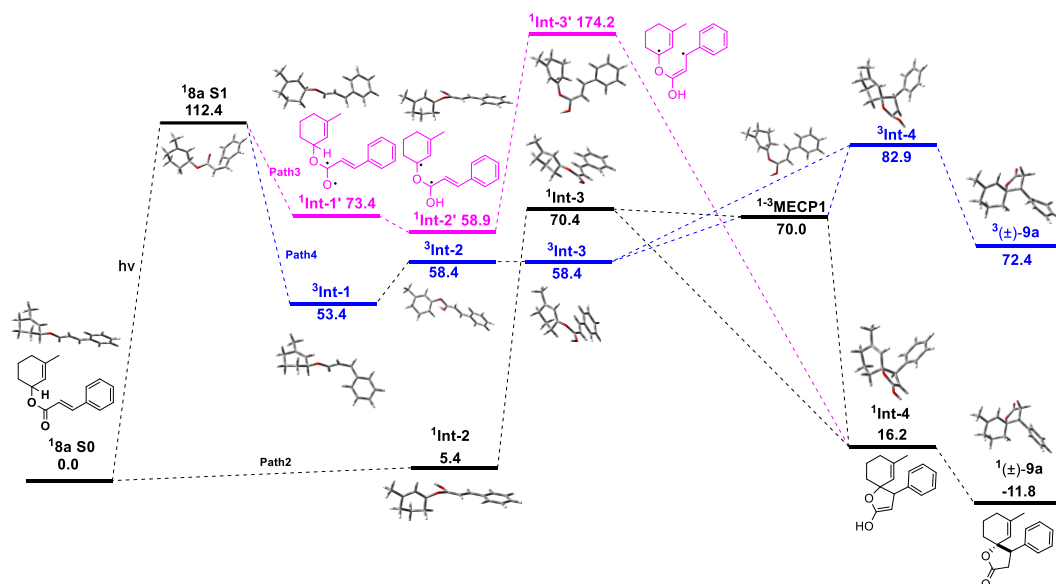

**Figure S11.** DFT(M06-2X/6-311G(d)) computational studies of *sequences b* (*Path 2*, *Path 3* and *Path 4*).

### Computational Methods.

All the DFT calculations were performed on the GAUSSIAN 16 C01 series of programs. Density functional theory M06-2X with a standard /6-311G (d) basis set was used for primary geometry optimizations.

The M06-2X/6-311G(d) level predicted optimized geometries in terms of Cartesian coordinates for the reactants, products, and intermediates for reactions presented.

### <sup>18a</sup> S0

Final structure in terms of initial Cartesian coordinates:

C -4.779588 -1.423013 -0.475574  
C -3.287329 -1.698570 -0.314136  
C -2.496995 -0.437850 -0.617569  
C -3.067526 0.770001 0.074800  
C -4.290504 0.810763 0.602270  
C -5.233797 -0.366843 0.531169  
C -4.818539 2.028609 1.304919  
O -1.148680 -0.685787 -0.160151  
C -0.186906 0.109114 -0.654989  
C 1.139337 -0.281146 -0.123810  
O -0.392012 1.010144 -1.427478  
C 2.223886 0.398744 -0.502827  
C 3.610903 0.156600 -0.092270  
C 4.611134 1.009340 -0.568930  
C 5.940484 0.822448 -0.210757  
C 6.290357 -0.225550 0.631678  
C 5.303820 -1.084184 1.113156  
C 3.978359 -0.896044 0.755497  
H -5.353705 -2.343616 -0.348624  
H -4.975470 -1.063385 -1.491819  
H -3.072410 -1.993375 0.718305  
H -2.952075 -2.509635 -0.964360  
H -2.443177 -0.255664 -1.695794  
H -2.424508 1.644687 0.112167  
H -5.317311 -0.810716 1.532160  
H -6.238550 -0.007731 0.282448  
H -4.067837 2.816593 1.372212  
H -5.693785 2.429012 0.783751  
H -5.143398 1.775425 2.319354  
H 1.160751 -1.120281 0.560772  
H 2.062216 1.223621 -1.194196  
H 4.337932 1.828201 -1.226754  
H 6.701299 1.494888 -0.590371  
H 7.326399 -0.376740 0.912619  
H 5.572878 -1.905129 1.768073  
H 3.223719 -1.575518 1.135318

### **<sup>18</sup>a S1**

Final structure in terms of initial Cartesian coordinates:

C -4.106030 -0.217101 -1.405089  
C -2.986991 -1.208980 -1.093824  
C -1.771595 -0.456482 -0.578001

C -2.142325 0.531430 0.498305  
C -3.387654 0.961428 0.715000  
C -4.552556 0.499975 -0.130289  
C -3.719474 1.927934 1.817366  
O -0.866957 -1.449723 -0.064681  
C 0.365474 -1.021672 0.301390  
C 1.197635 -1.925070 0.995368  
O 0.811003 0.117131 -0.134710  
C 2.548325 -1.653057 1.122229  
C 3.143911 -0.573195 0.379125  
C 4.251432 0.150587 0.811157  
C 4.645189 1.316661 0.155908  
C 3.943830 1.779587 -0.978434  
C 2.897394 1.048317 -1.491720  
C 2.445424 -0.141985 -0.837621  
H -4.953675 -0.728212 -1.871881  
H -3.741476 0.523351 -2.128897  
H -3.312322 -1.907030 -0.312794  
H -2.712222 -1.799567 -1.973115  
H -1.266078 0.062099 -1.402262  
H -1.322247 0.899411 1.112664  
H -5.183158 -0.167019 0.476312  
H -5.184604 1.362965 -0.377774  
H -2.838040 2.181532 2.411310  
H -4.140686 2.854834 1.409661  
H -4.477438 1.503827 2.487576  
H 0.746884 -2.816236 1.417463  
H 3.164800 -2.234039 1.802165  
H 4.774747 -0.171048 1.708049  
H 5.492564 1.882213 0.530298  
H 4.265288 2.691551 -1.471715  
H 2.407340 1.350222 -2.412049  
H 2.096015 -0.938388 -1.495089

### **'Int-1'**

Final structure in terms of initial Cartesian coordinates:

C -4.319682 -1.273634 -1.104079  
C -2.881365 -1.322806 -0.577654  
C -2.458810 0.047270 -0.150716  
C -3.362254 1.027461 0.215134  
C -4.723170 0.789610 0.272952  
C -5.246794 -0.567084 -0.111041

C -5.699594 1.815702 0.747615  
O -1.130612 0.427591 -0.246264  
C -0.164879 -0.400113 0.227179  
C 1.169546 0.159272 -0.070086  
O -0.389484 -1.428054 0.804810  
C 2.260326 -0.504032 0.323435  
C 3.657660 -0.108712 0.122898  
C 4.668354 -0.962103 0.575943  
C 6.008149 -0.635463 0.407247  
C 6.357729 0.555095 -0.217949  
C 5.360688 1.416282 -0.672292  
C 4.024835 1.088842 -0.504081  
H -4.677518 -2.285881 -1.305072  
H -4.335937 -0.726310 -2.051497  
H -2.801536 -2.020622 0.262657  
H -2.198549 -1.695793 -1.346854  
H -2.967173 2.003316 0.483272  
H -5.357351 -1.184394 0.793060  
H -6.252466 -0.471340 -0.534134  
H -5.207448 2.750615 1.020054  
H -6.449112 2.035414 -0.021687  
H -6.253205 1.457823 1.624322  
H 1.195827 1.100861 -0.604289  
H 2.095252 -1.443510 0.847500  
H 4.395359 -1.891379 1.065638  
H 6.777396 -1.310206 0.765028  
H 7.401835 0.814082 -0.351655  
H 5.629085 2.346542 -1.159863  
H 3.261864 1.770953 -0.861882

### **<sup>1</sup>Int-1**

Final structure in terms of initial Cartesian coordinates:

C -4.086315 -1.373554 -1.050264  
C -2.784424 -1.438611 -0.255189  
C -2.132263 -0.062854 -0.242236  
C -3.112179 1.012938 0.130388  
C -4.435115 0.868627 0.073145  
C -5.077860 -0.420988 -0.382037  
C -5.381301 1.966452 0.467772  
O -1.073557 -0.002229 0.723555  
C 0.123920 -0.521929 0.327348  
C 1.132363 -0.357741 1.329322

O 0.287357 -1.039514 -0.764813  
C 2.433243 -0.911157 1.111579  
C 3.503923 -0.250045 0.458728  
C 4.760387 -0.886933 0.322605  
C 5.799179 -0.252014 -0.326851  
C 5.606471 1.025490 -0.860480  
C 4.372854 1.666260 -0.744356  
C 3.326853 1.039739 -0.093323  
H -4.525842 -2.368695 -1.152283  
H -3.870222 -1.018862 -2.064256  
H -2.990975 -1.724463 0.782210  
H -2.086770 -2.163831 -0.676303  
H -1.693868 0.138493 -1.226020  
H -2.676492 1.951788 0.464164  
H -5.537916 -0.905072 0.490090  
H -5.905987 -0.190348 -1.061900  
H -4.852265 2.842441 0.845304  
H -5.995462 2.275467 -0.384188  
H -6.071132 1.620190 1.244439  
H 0.877972 0.128250 2.265873  
H 2.652781 -1.934511 1.440208  
H 4.894197 -1.881067 0.737019  
H 6.760788 -0.741203 -0.428586  
H 6.423098 1.520655 -1.374226  
H 4.234331 2.652554 -1.171588  
H 2.354946 1.510084 0.003211

### **<sup>3</sup>Int-1**

Final structure in terms of initial Cartesian coordinates:

C -4.164280 -1.367126 -0.983155  
C -2.832830 -1.437739 -0.238967  
C -2.158515 -0.074069 -0.288978  
C -3.100431 1.033309 0.084804  
C -4.426758 0.910916 0.087516  
C -5.109464 -0.380307 -0.298888  
C -5.335245 2.038995 0.483951  
O -1.064584 -0.008442 0.649117  
C 0.090100 -0.587628 0.260280  
C 1.130334 -0.423691 1.273223  
O 0.242042 -1.157440 -0.793805  
C 2.464825 -0.977479 1.074508  
C 3.523382 -0.276087 0.443465

C 4.800142 -0.872788 0.312126  
C 5.839195 -0.199237 -0.300511  
C 5.645193 1.088035 -0.804465  
C 4.393431 1.692957 -0.688828  
C 3.346449 1.027429 -0.078326  
H -4.623183 -2.356682 -1.040719  
H -3.983770 -1.042711 -2.014010  
H -3.005183 -1.691874 0.812649  
H -2.169497 -2.190191 -0.667686  
H -1.737112 0.092020 -1.286482  
H -2.634065 1.974998 0.363537  
H -5.536101 -0.830688 0.607355  
H -5.963764 -0.154932 -0.946891  
H -4.775136 2.917407 0.806697  
H -5.980575 2.329155 -0.351014  
H -5.995113 1.731662 1.301599  
H 0.863545 0.108732 2.181269  
H 2.650958 -1.989765 1.425806  
H 4.953398 -1.874251 0.701425  
H 6.809449 -0.674753 -0.392305  
H 6.461519 1.612825 -1.287097  
H 4.237730 2.690377 -1.084812  
H 2.374061 1.502784 0.001657

## **<sup>1</sup>Int-2**

Final structure in terms of initial Cartesian coordinates:

C -3.523170 1.899941 -0.642580  
C -2.265068 1.059751 -0.847631  
C -2.108395 0.095116 0.319131  
C -3.383321 -0.637121 0.621163  
C -4.583874 -0.236938 0.205360  
C -4.766194 1.011297 -0.626437  
C -5.837827 -0.998929 0.525074  
O -1.119015 -0.910327 0.015037  
C 0.169301 -0.539635 0.143785  
C 1.044596 -1.674573 -0.233393  
O 0.505806 0.561026 0.496459  
C 2.378053 -1.674737 -0.367095  
C 3.399948 -0.644702 -0.112069  
C 4.528191 -0.638037 -0.942228  
C 5.542969 0.291282 -0.761693

C 5.461779 1.209312 0.279970  
C 4.364640 1.187140 1.134772  
C 3.338530 0.272099 0.942062  
H -3.608592 2.657688 -1.424746  
H -3.446979 2.436528 0.309608  
H -2.353432 0.469235 -1.766101  
H -1.373820 1.683566 -0.928800  
H -1.754742 0.638451 1.202016  
H -3.281142 -1.537884 1.221420  
H -5.028447 0.709323 -1.649208  
H -5.631733 1.569652 -0.252647  
H -5.625634 -1.923312 1.063442  
H -6.514221 -0.392056 1.135207  
H -6.379741 -1.250821 -0.391953  
H 0.502293 -2.574108 -0.499919  
H 2.793993 -2.600437 -0.762359  
H 4.600944 -1.364551 -1.745954  
H 6.400217 0.292260 -1.425289  
H 6.254750 1.933362 0.430511  
H 4.304055 1.890359 1.957579  
H 2.486945 0.269544 1.606076

## **"Int-2"**

Final structure in terms of initial Cartesian coordinates:

C 3.788700 1.493810 1.031714  
C 2.460366 0.734396 1.100807  
C 2.409798 -0.283241 0.004243  
C 3.551795 -0.850856 -0.536674  
C 4.820223 -0.500167 -0.116769  
C 4.981024 0.535234 0.963196  
C 6.053397 -1.147895 -0.656948  
O 1.194816 -0.825504 -0.367737  
C 0.153530 0.024306 -0.565796  
C -1.115464 -0.328609 -0.214775  
O 0.440362 1.206864 -1.147919  
C -2.240270 0.451733 -0.502004  
C -3.596382 0.128179 -0.155192  
C -4.634432 1.002833 -0.537839  
C -5.957107 0.732898 -0.229636  
C -6.294208 -0.421428 0.474192  
C -5.283750 -1.298733 0.864599  
C -3.959834 -1.033349 0.558794



H 3.883592 2.160493 1.891194  
H 3.787105 2.122126 0.135133  
H 2.365083 0.221364 2.068233  
H 1.619986 1.429230 1.033491  
H 1.286856 1.143685 -1.611247  
H 3.418977 -1.615570 -1.297316  
H 5.104009 0.029677 1.932411  
H 5.906944 1.097889 0.802858  
H 5.821397 -1.906777 -1.405660  
H 6.722098 -0.409699 -1.114645  
H 6.627156 -1.628522 0.144622  
H -1.196960 -1.272873 0.309049  
H -2.077772 1.382268 -1.036490  
H -4.381545 1.903882 -1.088146  
H -6.732492 1.424797 -0.540287  
H -7.329128 -0.634788 0.715751  
H -5.534067 -2.199317 1.415044  
H -3.196974 -1.733411 0.879779

### **<sup>3</sup>Int-2**

Final structure in terms of initial Cartesian coordinates:

C -1.735189 -1.191034 1.598008  
C -1.698393 0.332439 1.434137  
C -2.000337 0.683134 0.010887  
C -2.777698 -0.123837 -0.805739  
C -3.306711 -1.325019 -0.368660  
C -3.029383 -1.787734 1.036629  
C -4.181071 -2.175715 -1.233498  
O -1.632963 1.916570 -0.496888  
C -0.429411 2.468868 -0.208209  
C 0.788025 1.845596 -0.108823  
O -0.516590 3.810504 -0.102726  
C 1.048680 0.484599 -0.305634  
C 2.340681 -0.141802 -0.209069  
C 2.455056 -1.522899 -0.478413  
C 3.674597 -2.177165 -0.398676  
C 4.827690 -1.476647 -0.044467  
C 4.736657 -0.111011 0.228132  
C 3.519434 0.547807 0.148957  
H -1.618806 -1.454809 2.653265  
H -0.878666 -1.618138 1.061737  
H -2.447765 0.800200 2.092353

H -0.720966 0.717008 1.737919  
H -1.454177 4.049788 -0.160794  
H -2.973703 0.221988 -1.818325  
H -3.875175 -1.509319 1.686391  
H -2.980630 -2.883855 1.064822  
H -4.339031 -1.724957 -2.217047  
H -3.745918 -3.173436 -1.380480  
H -5.164970 -2.332458 -0.770147  
H 1.597547 2.528400 0.128970  
H 0.222829 -0.167032 -0.579678  
H 1.561114 -2.075924 -0.757809  
H 3.728605 -3.240403 -0.614029  
H 5.783511 -1.986695 0.019799  
H 5.626840 0.445708 0.506461  
H 3.480013 1.609856 0.370113

### **<sup>1</sup>Int-3**

Final structure in terms of initial Cartesian coordinates:

C -1.979308 -1.423451 1.404034  
C -1.617781 0.065335 1.359193  
C -1.879206 0.596238 -0.008406  
C -2.892600 0.040328 -0.832323  
C -3.613881 -1.051531 -0.482040  
C -3.379060 -1.703554 0.854730  
C -4.685280 -1.629833 -1.350907  
O -1.495723 1.849497 -0.347589  
C -0.334809 2.371133 0.003425  
C 0.871383 1.708505 0.172747  
O -0.345521 3.724230 -0.008863  
C 1.138913 0.358042 0.081281  
C 2.471342 -0.206428 -0.052469  
C 2.603327 -1.602284 -0.154889  
C 3.846353 -2.204862 -0.272635  
C 5.001760 -1.429132 -0.284900  
C 4.892251 -0.043876 -0.183821  
C 3.650280 0.560403 -0.075239  
H -1.889642 -1.792107 2.427980  
H -1.247215 -1.973586 0.802246  
H -2.227104 0.638447 2.076668  
H -0.580859 0.185462 1.686822  
H -1.220490 4.023990 -0.280033  
H -3.078650 0.536980 -1.781108

H -4.135449 -1.340921 1.566327  
H -3.539773 -2.784495 0.776976  
H -4.824924 -1.051561 -2.265428  
H -4.450477 -2.662830 -1.633935  
H -5.644007 -1.665857 -0.819881  
H 1.692480 2.407751 0.285922  
H 0.331537 -0.358203 0.021422  
H 1.706771 -2.215120 -0.141632  
H 3.915154 -3.284298 -0.352794  
H 5.975733 -1.896174 -0.375495  
H 5.785558 0.571236 -0.196678  
H 3.599199 1.641266 -0.012448

### **'Int-3'**

Final structure in terms of initial Cartesian coordinates:

C -1.735189 -1.191034 1.598008  
C -1.698393 0.332439 1.434137  
C -2.000337 0.683134 0.010887  
C -2.777698 -0.123837 -0.805739  
C -3.306711 -1.325019 -0.368660  
C -3.029383 -1.787734 1.036629  
C -4.181071 -2.175715 -1.233498  
O -1.632963 1.916570 -0.496888  
C -0.429411 2.468868 -0.208209  
C 0.788025 1.845596 -0.108823  
O -0.516590 3.810504 -0.102726  
C 1.048680 0.484599 -0.305634  
C 2.340681 -0.141802 -0.209069  
C 2.455056 -1.522899 -0.478413  
C 3.674597 -2.177165 -0.398676  
C 4.827690 -1.476647 -0.044467  
C 4.736657 -0.111011 0.228132  
C 3.519434 0.547807 0.148957  
H -1.618806 -1.454809 2.653265  
H -0.878666 -1.618138 1.061737  
H -2.447765 0.800200 2.092353  
H -0.720966 0.717008 1.737919  
H -1.454177 4.049788 -0.160794  
H -2.973703 0.221988 -1.818325  
H -3.875175 -1.509319 1.686391  
H -2.980630 -2.883855 1.064822

H -4.339031 -1.724957 -2.217047  
H -3.745918 -3.173436 -1.380480  
H -5.164970 -2.332458 -0.770147  
H 1.597547 2.528400 0.128970  
H 0.222829 -0.167032 -0.579678  
H 1.561114 -2.075924 -0.757809  
H 3.728605 -3.240403 -0.614029  
H 5.783511 -1.986695 0.019799  
H 5.626840 0.445708 0.506461  
H 3.480013 1.609856 0.370113

### **'Int-2'**

Final structure in terms of initial Cartesian coordinates:

C 2.505392 -1.018019 -1.385491  
C 2.401388 0.357363 -0.732400  
C 1.087573 0.492845 0.035149  
C 0.831150 -0.711675 0.891118  
C 1.449796 -1.881961 0.744456  
C 2.494935 -2.112079 -0.319634  
C 1.162058 -3.050785 1.641745  
O 1.196815 1.636947 0.912784  
C 0.634511 2.747952 0.355669  
C -0.103403 2.336000 -0.829555  
O 0.745094 3.842173 0.834581  
C -0.093968 0.856782 -0.942347  
C -1.422567 0.214201 -0.581059  
C -1.797529 -0.976096 -1.201509  
C -2.976238 -1.621278 -0.848667  
C -3.796921 -1.080429 0.135412  
C -3.430941 0.106343 0.760342  
C -2.250650 0.750985 0.404904  
H 3.412668 -1.082129 -1.990337  
H 1.662859 -1.171721 -2.069849  
H 3.215229 0.492845 -0.014159  
H 2.481011 1.162318 -1.470895  
H 0.082031 -0.580521 1.667433  
H 3.476455 -2.170304 0.169293  
H 2.334871 -3.093835 -0.778578  
H 0.461298 -2.790280 2.435119  
H 0.739742 -3.882083 1.068490  
H 2.084621 -3.419093 2.101611  
H -0.655912 3.028776 -1.446645

H 0.170709 0.532534 -1.954226  
H -1.154130 -1.404890 -1.964345  
H -3.254691 -2.545202 -1.343045  
H -4.717611 -1.580965 0.412704  
H -4.066381 0.534553 1.527408  
H -1.975542 1.676149 0.902303

### **<sup>3</sup>Int-3**

Final structure in terms of initial Cartesian coordinates:

C -1.617182 -1.083753 1.698125  
C -1.737167 0.423754 1.453762  
C -1.999636 0.663416 0.002585  
C -2.653686 -0.253011 -0.798779  
C -3.081688 -1.476406 -0.316613  
C -2.817994 -1.838138 1.120444  
C -3.839525 -2.450986 -1.158330  
O -1.704129 1.901413 -0.555810  
C -0.515645 2.504890 -0.295471  
C 0.711125 1.914480 -0.218520  
O -0.656042 3.835050 -0.164752  
C 0.985994 0.563520 -0.484066  
C 2.253870 -0.081238 -0.284226  
C 2.417501 -1.420438 -0.697744  
C 3.618948 -2.086823 -0.528009  
C 4.703598 -1.442177 0.063979  
C 4.561641 -0.121229 0.486030  
C 3.362068 0.549941 0.319508  
H -1.519642 -1.283216 2.767167  
H -0.700058 -1.439284 1.217421  
H -2.562931 0.838988 2.049662  
H -0.825490 0.934652 1.771960  
H -1.597679 4.041486 -0.156103  
H -2.832765 0.019253 -1.835441  
H -3.715303 -1.619873 1.718744  
H -2.659308 -2.918464 1.207175  
H -4.004865 -2.074046 -2.168787  
H -3.309841 -3.407711 -1.233403  
H -4.818213 -2.674080 -0.716248  
H 1.506615 2.594536 0.063841  
H 0.195470 -0.053206 -0.898471  
H 1.578904 -1.928243 -1.165126  
H 3.714171 -3.114848 -0.860381

H 5.645276 -1.961497 0.198325  
H 5.396748 0.387881 0.955298  
H 3.276942 1.571175 0.672817

### **<sup>1-3</sup>MECP1**

C -1.972314 -1.354517 1.481163  
C -1.622720 0.133983 1.373532  
C -1.871372 0.604434 -0.017615  
C -2.881047 0.010212 -0.823470  
C -3.590926 -1.075476 -0.438479  
C -3.359308 -1.678191 0.922462  
C -4.637618 -1.704717 -1.302121  
O -1.486250 1.839128 -0.406186  
C -0.332242 2.381524 -0.073811  
C 0.872435 1.723168 0.140242  
O -0.334910 3.731334 -0.177432  
C 1.126877 0.369499 0.117228  
C 2.454749 -0.210465 -0.012795  
C 2.564927 -1.575330 -0.330088  
C 3.801746 -2.183342 -0.483527  
C 4.970260 -1.448128 -0.309486  
C 4.880838 -0.098820 0.026037  
C 3.645777 0.513560 0.170159  
H -1.898823 -1.672866 2.523335  
H -1.221551 -1.923008 0.920940  
H -2.245745 0.735717 2.054801  
H -0.590854 0.273148 1.710621  
H -1.184845 4.012178 -0.535753  
H -3.068378 0.469807 -1.790739  
H -4.131056 -1.309011 1.613546  
H -3.498013 -2.764172 0.878178  
H -4.772369 -1.160032 -2.237719  
H -4.373035 -2.740477 -1.547221  
H -5.605164 -1.745006 -0.787562  
H 1.701527 2.420755 0.191078  
H 0.312270 -0.339521 0.071998  
H 1.657604 -2.154758 -0.474840  
H 3.853551 -3.235025 -0.743024

H 5.939226 -1.918938 -0.432539  
H 5.785729 0.480590 0.174415  
H 3.608846 1.562548 0.442844

#### **<sup>1</sup>Int-4**

Final structure in terms of initial Cartesian coordinates:

C 2.374000 -1.274801 -1.395516  
C 2.396588 0.111339 -0.758191  
C 1.107548 0.364204 0.020788  
C 0.755456 -0.805126 0.890179  
C 1.272841 -2.024774 0.752111  
C 2.289451 -2.350957 -0.315453  
C 0.886682 -3.159711 1.656003  
O 1.344677 1.505344 0.895892  
C 0.851543 2.582952 0.263407  
C 0.096533 2.337947 -0.811485  
O 1.217067 3.725238 0.857951  
C -0.046374 0.844082 -0.943446  
C -1.419139 0.304119 -0.583585  
C -1.869096 -0.885884 -1.156448  
C -3.095337 -1.433140 -0.799119  
C -3.892946 -0.794798 0.145275  
C -3.453790 0.390529 0.724251  
C -2.226787 0.935621 0.360646  
H 3.262283 -1.423431 -2.014018  
H 1.509622 -1.362744 -2.063482  
H 3.228421 0.180254 -0.050666  
H 2.530110 0.899239 -1.505001  
H 0.794122 4.460376 0.403222  
H 0.016168 -0.607863 1.662047  
H 3.268189 -2.478610 0.166136  
H 2.048802 -3.323445 -0.759089  
H 0.204993 -2.836530 2.443053  
H 0.400900 -3.958530 1.086684  
H 1.773921 -3.598337 2.123897  
H -0.407492 3.073462 -1.420586  
H 0.197062 0.491575 -1.951169  
H -1.245536 -1.391943 -1.888729  
H -3.430039 -2.357118 -1.258113  
H -4.850670 -1.218190 0.426719  
H -4.069656 0.894879 1.460920  
H -1.888192 1.862703 0.810921

### **<sup>3</sup>Int-4**

Final structure in terms of initial Cartesian coordinates:

C 2.888275 -0.147257 -1.288629  
C 2.260490 1.093842 -0.661156  
C 0.934011 0.751618 0.016516  
C 1.052631 -0.489046 0.852028  
C 2.053334 -1.364645 0.761197  
C 3.192584 -1.186780 -0.212803  
C 2.125829 -2.582158 1.636896  
O 0.575278 1.834725 0.909458  
C -0.207678 2.752710 0.283048  
C -0.600352 2.183663 -1.046132  
O -1.216073 3.143090 1.141349  
C -0.241042 0.729835 -1.031804  
C -1.367531 -0.214450 -0.652747  
C -1.437033 -1.473613 -1.246841  
C -2.425544 -2.380352 -0.881071  
C -3.356389 -2.037608 0.092865  
C -3.290679 -0.785000 0.694262  
C -2.305024 0.123441 0.324447  
H 3.798549 0.119262 -1.830816  
H 2.200538 -0.580910 -2.023568  
H 2.924838 1.498538 0.108461  
H 2.101015 1.883978 -1.402437  
H -1.672969 3.890509 0.743305  
H 0.247660 -0.648392 1.564119  
H 4.087391 -0.893348 0.352357  
H 3.433613 -2.152986 -0.669403  
H 1.302792 -2.616759 2.350991  
H 2.096971 -3.494713 1.033196  
H 3.068288 -2.600341 2.193670  
H -0.698201 2.770684 -1.948661  
H 0.152043 0.416734 -2.002823  
H -0.705249 -1.748482 -2.001433  
H -2.468509 -3.354054 -1.356804  
H -4.128952 -2.741669 0.381100  
H -4.011466 -0.511089 1.456939  
H -2.257280 1.095331 0.804906

### **<sup>1</sup>(±)-9a**



Final structure in terms of initial Cartesian coordinates:

C 1.835754 -1.338612 1.714024  
C 0.577306 -1.069834 0.895789  
C 0.760145 0.153004 0.011010  
C 2.107179 0.153637 -0.668372  
C 3.117541 -0.651222 -0.341468  
C 3.009285 -1.644702 0.787999  
O 0.677193 1.329748 0.863222  
C 0.106033 2.368554 0.217703  
C -0.355419 1.908394 -1.156676  
C -0.374405 0.382733 -1.040659  
C 4.428664 -0.625268 -1.072752  
O -0.009831 3.450385 0.705176  
H 0.373402 2.257732 -1.892097  
H -1.316156 2.358697 -1.401040  
C -1.716416 -0.159410 -0.600207  
C -2.171306 -1.379043 -1.102474  
C -3.381209 -1.920387 -0.682428  
C -4.157390 -1.246208 0.252888  
C -3.716909 -0.027791 0.758629  
C -2.507960 0.511745 0.335484  
H 1.669168 -2.166789 2.406386  
H 2.063839 -0.452832 2.313975  
H -0.292155 -0.912231 1.536698  
H 0.353561 -1.930623 0.254602  
H 2.242418 0.874057 -1.473878  
H 2.904750 -2.651042 0.359894  
H 3.951049 -1.655294 1.346639  
H -0.086548 -0.105037 -1.974092  
H 4.414550 0.067240 -1.914977  
H 5.237504 -0.330670 -0.397405  
H 4.679043 -1.622045 -1.449514  
H -1.570368 -1.909432 -1.835562  
H -3.719117 -2.867272 -1.088876  
H -5.101822 -1.664072 0.582634  
H -4.316614 0.508243 1.485485  
H -2.190759 1.466748 0.743020

<sup>3</sup>(±)-9a

Final structure in terms of initial Cartesian coordinates:

C 2.039432 -1.282063 1.698969  
C 0.752555 -1.136267 0.894014  
C 0.804150 0.102409 0.013556  
C 2.134774 0.223716 -0.688448  
C 3.218708 -0.486903 -0.378937  
C 3.224230 -1.477406 0.758479  
O 0.612744 1.269537 0.856001  
C -0.042182 2.252954 0.190702  
C -0.464695 1.733199 -1.175728  
C -0.362567 0.210983 -1.021519  
C 4.507473 -0.350080 -1.137075  
O -0.226805 3.333007 0.656866  
H 0.230035 2.121064 -1.924336  
H -1.461373 2.098407 -1.419184  
C -1.654638 -0.357202 -0.512951  
C -2.212371 -1.503173 -0.982564  
C -3.527026 -1.891564 -0.583492  
C -4.371066 -0.957797 0.117981  
C -3.852469 0.186981 0.609612  
C -2.378098 0.325884 0.600505  
H 1.962014 -2.120689 2.394471  
H 2.187718 -0.376353 2.294399  
H -0.118726 -1.079341 1.549064  
H 0.609651 -2.009791 0.246833  
H 2.189798 0.947370 -1.500133  
H 3.214259 -2.492825 0.339019  
H 4.170368 -1.390158 1.302862  
H -0.072352 -0.296803 -1.943643  
H 4.416216 0.335971 -1.979788  
H 5.301113 0.015832 -0.478787  
H 4.835565 -1.322771 -1.517025  
H -1.696644 -2.090247 -1.738620  
H -3.950336 -2.812294 -0.964286  
H -5.436240 -1.156553 0.178277  
H -4.474076 0.953288 1.059737  
H -1.891768 0.293515 1.579577

## Preparation of Starting Materials Allyl Acrylic Esters.

### 1. Preparation of compound **8a** to **8o**.

To the mixture of **8p1** (224 mg, 2.0 mmol, 1.0 equiv), cinnamic acid (2.4 mmol, 1.2 equiv) and 4-dimethylaminopyridine (DMAP, 49 mg, 0.4 mmol, 0.2 equiv) in DCM (20 mL) was added dicyclohexylcarbodiimide (DCC, 495 mg, 2.4 mmol, 1.2 equiv) in portions at 0 °C. After 30 min, the reaction mixture was filtered. The solvent was evaporated under reduced pressure. The crude product was purified by column chromatography on silica gel (Petroleum ether/ EtOAc = 30/1) to give **8a** to **8o**.

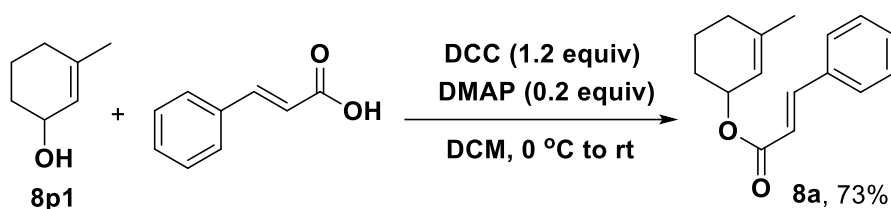

**(E)-3-Methylcyclohex-2-en-1-yl cinnamate (8a):** To the mixture of **8p1** (224 mg, 2.0 mmol, 1.0 equiv), (*E*)-cinnamic acid (356 mg, 2.4 mmol, 1.2 equiv) and 4-dimethylaminopyridine (DMAP, 49 mg, 0.4 mmol, 0.2 equiv) in DCM (20 mL) was added dicyclohexylcarbodiimide (DCC, 495 mg, 2.4 mmol, 1.2 equiv) in portions at 0 °C. After 30 min, the reaction mixture was filtered. The solvent was evaporated under reduced pressure. The crude product was purified by column chromatography on silica gel (Petroleum ether/ EtOAc = 30/1) to give **8a** (354 mg, 73% yield). Colorless oil; <sup>1</sup>H NMR (400 MHz, CDCl<sub>3</sub>) δ 7.68 (d, *J* = 16.0 Hz, 1H), 7.53-7.50 (m, 2H), 7.38 – 7.36 (m, 3H), 6.45 (d, *J* = 16.0 Hz, 1H), 5.55 (s, 1H), 5.40 (s, 1H), 2.05 – 1.96 (m, 2H), 1.86 – 1.78 (m, 3H), 1.74 (s, 3H), 1.70-1.64 (m, 1H); <sup>13</sup>C NMR (100 MHz, CDCl<sub>3</sub>) δ 166.7, 144.4, 141.2, 134.5, 130.1, 128.8, 128.0, 120.0, 118.7, 68.9, 29.9, 28.1, 23.8, 19.1; HRMS(EI) Calcd for C<sub>16</sub>H<sub>19</sub>O<sub>2</sub> [M + H]<sup>+</sup>: 242.1385, Found 243.1379; IR (KBr) ν(cm<sup>-1</sup>): 3350, 2947, 2833, 1651, 1451, 1115, 1032.

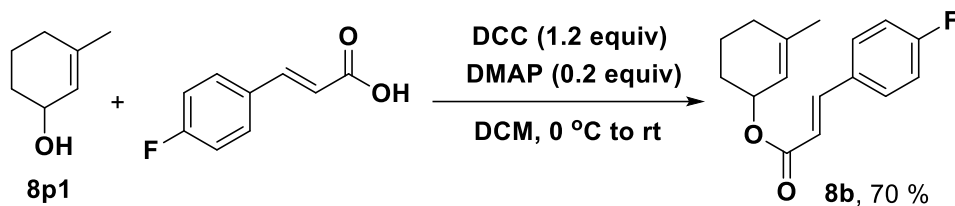

**(E)-3-Methylcyclohex-2-en-1-yl 3-(4-fluorophenyl)acrylate (8b):** To the mixture of **8p1** (224 mg, 2.0 mmol, 1.0 equiv), (*E*)-3-(4-fluorophenyl)acrylic acid (399 mg, 2.4 mmol, 1.2 equiv) and 4-dimethylaminopyridine (DMAP, 49 mg, 0.4 mmol, 0.2 equiv) in DCM (20 mL) was added dicyclohexylcarbodiimide (DCC, 495 mg, 2.4 mmol, 1.2 equiv) in portions at 0 °C. After 30 min, the reaction mixture was filtered. The solvent was evaporated under reduced pressure. The crude product was purified by column chromatography on silica gel (Petroleum ether/ EtOAc = 30/1) to give **8b** (364 mg, 70% yield). Colorless oil; <sup>1</sup>H NMR (400 MHz, CDCl<sub>3</sub>) δ 7.62 (d, *J* = 16.0 Hz, 1H), 7.49 (dd, *J* = 8.6 and 5.4 Hz, 2H), 7.05 (t, *J* = 8.6 Hz, 2H), 6.36 (d, *J* = 16.0 Hz, 1H), 5.53 (s, 1H), 5.38 (s, 1H), 2.04 – 1.95 (m, 2H), 1.85-1.76 (m, 3H), 1.72 (s, 3H), 1.68 – 1.61 (m, 1H); <sup>13</sup>C NMR (100 MHz, CDCl<sub>3</sub>) δ 166.5, 163.7 (d, *J*<sub>C-F</sub> = 249.5 Hz), 143.0, 141.2, 130.8 (d, *J*<sub>C-F</sub> = 3.3 Hz), 129.8 (d, *J*<sub>C-F</sub> = 8.5 Hz), 120.0, 118.5 (d, *J*<sub>C-F</sub> = 2.3 Hz), 116.0, 115.8, 68.9, 29.9, 28.0, 23.7, 19.0; <sup>19</sup>F NMR (376 MHz, CDCl<sub>3</sub>) δ -109.88; HRMS(EI) Calcd for C<sub>16</sub>H<sub>17</sub>FO<sub>2</sub> [M<sup>+</sup>]: 260.1213, Found 260.1209; IR (KBr) ν (cm<sup>-1</sup>): 2937, 1708, 1639, 1601, 1510, 1233, 1161, 981, 917, 832.

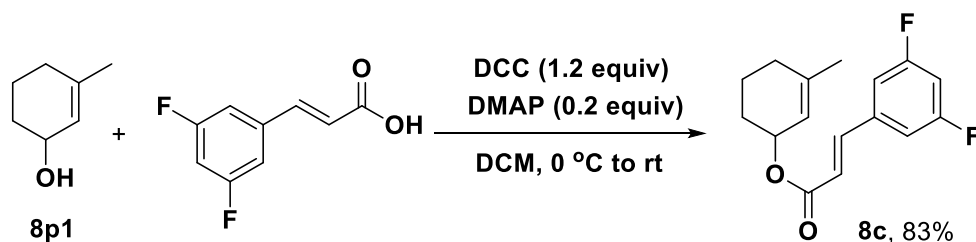

**(E)-3-Methylcyclohex-2-en-1-yl 3-(3,5-difluorophenyl)acrylate (8c):** To the mixture of **8p1** (224 mg, 2.0 mmol, 1.0 equiv), (*E*)-3-(3,5-difluorophenyl)acrylic acid (442 mg, 2.4 mmol, 1.2 equiv) and 4-dimethylaminopyridine (DMAP, 49 mg, 0.4 mmol, 0.2 equiv) in DCM (20 mL) was added dicyclohexylcarbodiimide (DCC, 495 mg, 2.4 mmol, 1.2 equiv) in portions at 0 °C. After 30 min, the reaction mixture was filtered. The solvent was evaporated under reduced pressure. The crude product was purified by

column chromatography on silica gel (Petroleum ether/ EtOAc = 30/1) to give **8c**. (463 mg, 83% yield). White solid; mp 39.1-39.3 °C; <sup>1</sup>H NMR (400 MHz, CDCl<sub>3</sub>) δ 7.55 (d, *J* = 16.0 Hz, 1H), 7.04-6.99 (m, 2H), 6.81 (tt, *J* = 8.7 and 2.2 Hz, 1H), 6.42 (d, *J* = 16.0 Hz, 1H), 5.53 (s, 1H), 5.38 (s, 1H), 2.05 – 1.96 (m, 2H), 1.84-1.76 (m, 3H), 1.73 (s, 3H), 1.70-1.65 (m, 1H); <sup>13</sup>C NMR (100 MHz, CDCl<sub>3</sub>) δ 165.9, 163.2 (d, *J*<sub>C-F</sub> = 247.6 Hz), 163.1 (d, *J*<sub>C-F</sub> = 247.7 Hz), 141.7 (t, *J*<sub>C-F</sub> = 2.9 Hz), 141.5, 137.8 (t, *J*<sub>C-F</sub> = 9.5 Hz), 121.5, 119.7, 110.62 (d, *J*<sub>C-F</sub> = 25.7 Hz), 110.58 (d, *J*<sub>C-F</sub> = 11.6 Hz), 105.2 (t, *J*<sub>C-F</sub> = 25.4 Hz), 69.3, 29.9, 28.0, 23.7, 19.0; <sup>19</sup>F NMR (376 MHz, CDCl<sub>3</sub>) δ -109.15; HRMS(EI) Calcd for C<sub>16</sub>H<sub>16</sub>F<sub>2</sub>O<sub>2</sub> [M<sup>+</sup>]: 278.1118, Found 278.1124; IR (KBr) (cm<sup>-1</sup>): 2938, 1711, 1592, 1440, 1277, 1181, 1122, 980, 915, 851.

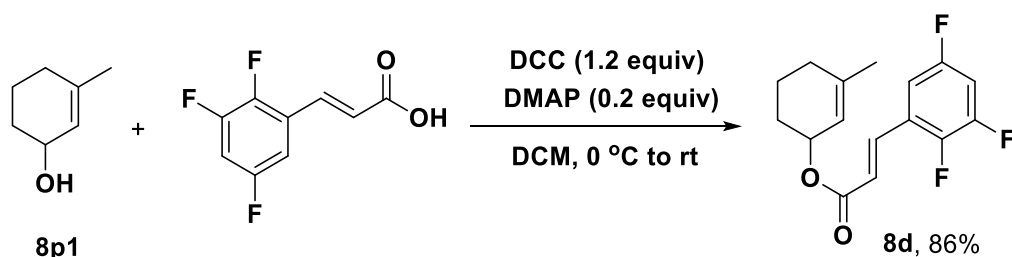

**(E)-3-Methylcyclohex-2-en-1-yl 3-(2,3,5-trifluorophenyl)acrylate (8d)**: To the mixture of **8p1** (224 mg, 2.0 mmol, 1.0 equiv), (*E*)-3-(2,3,5-trifluorophenyl)acrylic acid (485 mg, 2.4 mmol, 1.2 equiv) and 4-dimethylaminopyridine (DMAP, 49 mg, 0.4 mmol, 0.2 equiv) in DCM (20 mL) was added dicyclohexylcarbodiimide (DCC, 495 mg, 2.4 mmol, 1.2 equiv) in portions at 0 °C. After 30 min, the reaction mixture was filtered. The solvent was evaporated under reduced pressure. The crude product was purified by column chromatography on silica gel (Petroleum ether/ EtOAc = 30/1) to give **8d** (510 mg, 86% yield). White solid; mp 66.8-67.1 °C; <sup>1</sup>H NMR (400 MHz, CDCl<sub>3</sub>) δ 7.71 (d, *J* = 16.2 Hz, 1H), 7.05-6.90 (m, 2H), 6.52 (d, *J* = 16.2 Hz, 1H), 5.53 (s, 1H), 5.38 (s, 1H), 2.06 – 1.92(m, 2H), 1.85 – 1.76 (m, 3H), 1.73 (s, 3H), 1.69 – 1.65 (m, 1H); <sup>13</sup>C NMR (100 MHz, CDCl<sub>3</sub>) δ 165.6, 157.5 (ddd, *J*<sub>C-F</sub> = 244.4, 10.6 and 3.2 Hz), 150.6 (ddd, *J*<sub>C-F</sub> = 250.1, 14.6 and 12.9 Hz), 145.8 (ddd, *J*<sub>C-F</sub> = 250.1, 13.3 and 4.0 Hz), 141.4, 134.3 (q, *J*<sub>C-F</sub> = 2.8 Hz), 125.2-125.0 (m, 1C), 123.7 (d, *J*<sub>C-F</sub> = 6.1 Hz), 119.7, 109.3 (ddd, *J*<sub>C-F</sub> = 24.3, 3.6 and 1.3 Hz), 106.5 (dd, *J*<sub>C-F</sub> = 27.5 and 22.0 Hz), 69.4, 29.8, 27.9,

23.6, 18.9;  $^{19}\text{F}$  NMR (376 MHz,  $\text{CDCl}_3$ )  $\delta$  -114.79 (dd,  $J = 14.8$  and  $3.4$  Hz), -132.57 (dd,  $J = 19.9$  and  $3.4$  Hz), -144.70 (dd,  $J = 19.9$  and  $14.8$  Hz); HRMS(EI) Calcd for  $\text{C}_{16}\text{H}_{16}\text{F}_3\text{O}_2$   $[\text{M} + \text{H}]^+$  : 297.1102, Found 297.1097; IR (KBr)  $\nu$  ( $\text{cm}^{-1}$ ) : 3433, 2938, 1706, 1640, 1597, 1494, 1445, 1280, 1198, 1164, 1128, 1051, 1000, 987.

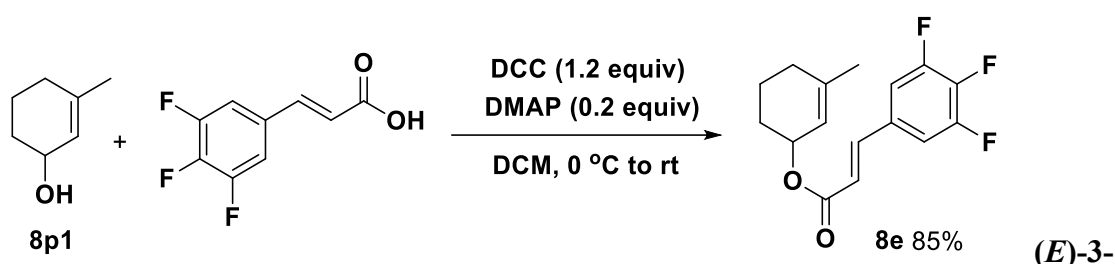

**Methylcyclohex-2-en-1-yl 3-(3,4,5-trifluorophenyl)acrylate (8e):** To the mixture of **8p1** (224 mg, 2.0 mmol, 1.0 equiv), (*E*)-3-(3,4,5-trifluorophenyl)acrylic acid (485 mg, 2.4 mmol, 1.2 equiv) and 4-dimethylaminopyridine (DMAP, 49 mg, 0.4 mmol, 0.2 equiv) in DCM (20 mL) was added dicyclohexylcarbodiimide (DCC, 495 mg, 2.4 mmol, 1.2 equiv) in portions at 0 °C. After 30 min, the reaction mixture was filtered. The solvent was evaporated under reduced pressure. The crude product was purified by column chromatography on silica gel (Petroleum ether/ EtOAc = 30/1) to give **8e** (504 mg, 85% yield). White solid; mp 81.6-81.9 °C;  $^1\text{H}$  NMR (400 MHz,  $\text{CDCl}_3$ )  $\delta$  7.49 (d,  $J = 15.9$  Hz, 1H), 7.23 – 6.99 (m, 2H), 6.35 (d,  $J = 15.9$  Hz, 1H), 5.52 (s, 1H), 5.37 (s, 1H), 2.06 – 1.90 (m, 2H), 1.85-1.75 (m, 3H), 1.73 (s, 3H), 1.69-1.64 (m, 1H);  $^{13}\text{C}$  NMR (100 MHz,  $\text{CDCl}_3$ )  $\delta$  165.7, 151.3 (ddd,  $J_{\text{C-F}} = 249.5, 10.3$  and  $4.1$  Hz), 141.4, 140.5 (dt,  $J_{\text{C-F}} = 245.6$  and  $15.4$  Hz), 140.8 (d,  $J_{\text{C-F}} = 2.3$  Hz), 130.7 (td,  $J_{\text{C-F}} = 7.8$  and  $4.8$  Hz), 121.2 (d,  $J_{\text{C-F}} = 2.4$  Hz), 119.7, 111.8 (dd,  $J_{\text{C-F}} = 15.8$  and  $6.0$  Hz), 69.3, 29.8, 27.9, 23.7, 18.9;  $^{19}\text{F}$  NMR (376 MHz,  $\text{CDCl}_3$ )  $\delta$  -133.33 (d,  $J_{\text{C-F}} = 20.1$  Hz), -157.09 (t,  $J_{\text{C-F}} = 20.0$  Hz); HRMS(EI) Calcd for  $\text{C}_{16}\text{H}_{16}\text{F}_3\text{O}_2$   $[\text{M} + \text{H}]^+$  : 297.1102, Found 297.1094; IR (KBr)  $\nu$  ( $\text{cm}^{-1}$ ) : 2940, 1711, 1645, 1529, 1442, 1329, 1308, 1277, 1184, 1166, 1046, 991.

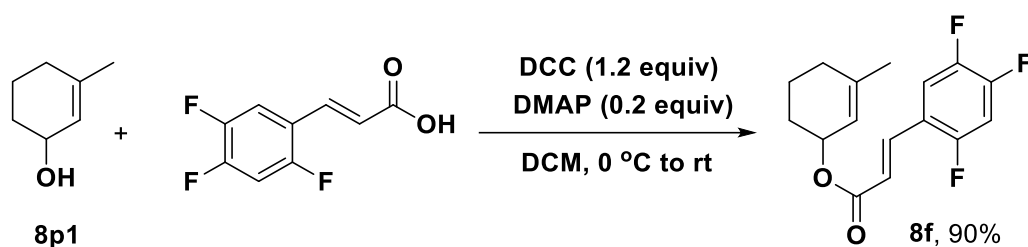

**(E)-3-Methylcyclohex-2-en-1-yl 3-(2,4,5-trifluorophenyl)acrylate (8f):** To the mixture of **8p1** (224 mg, 2.0 mmol, 1.0 equiv), (*E*)-3-(2,4,5-trifluorophenyl)acrylic acid (485 mg, 2.4 mmol, 1.2 equiv) and 4-dimethylaminopyridine (DMAP, 49 mg, 0.4 mmol, 0.2 equiv) in DCM (20 mL) was added dicyclohexylcarbodiimide (DCC, 495 mg, 2.4 mmol, 1.2 equiv) in portions at 0 °C. After 30 min, the reaction mixture was filtered. The solvent was evaporated under reduced pressure. The crude product was purified by column chromatography on silica gel (Petroleum ether/ EtOAc = 30/1) to give **8f** (533 mg, 90 % yield). White solid; mp 77.9-78.1 °C; <sup>1</sup>H NMR (400 MHz, CDCl<sub>3</sub>) δ 7.67 (d, *J* = 16.1 Hz, 1H), 7.35-7.25 (m, 1H), 6.96 (td, *J* = 9.8 and 6.6 Hz, 1H), 6.44 (d, *J* = 16.1 Hz, 1H), 5.52 (s, 1H), 5.38 (s, 1H), 2.04 – 1.95 (m, 2H), 1.91-1.76(m, 3H), 1.72 (s, 3H), 1.69 – 1.63 (m, 1H); <sup>13</sup>C NMR (150 MHz, CDCl<sub>3</sub>) δ 166.0, 156.4 (ddd, *J*<sub>C-F</sub> = 251.6, 9.2 and 2.2 Hz), 150.9 (ddd, *J*<sub>C-F</sub> = 254.5, 14.8 and 12.5 Hz), 149.5 (ddd, *J*<sub>C-F</sub> = 244.6, 13.0 and 3.5 Hz), 141.5, 134.7 (d, *J*<sub>C-F</sub> = 2.0 Hz), 122.1 (dd, *J*<sub>C-F</sub> = 6.0 and 2.4 Hz), 119.8, 119.2 (dt, *J*<sub>C-F</sub> = 13.8 and 5.2 Hz), 116.0 (ddd, *J*<sub>C-F</sub> = 19.6, 4.5 and 1.5 Hz), 106.3 (dd, *J*<sub>C-F</sub> = 28.0 and 21.0 Hz), 69.2, 29.8, 27.9, 23.6, 18.9; <sup>19</sup>F NMR (376 MHz, CDCl<sub>3</sub>) δ -115.68 (dd, *J*<sub>C-F</sub> = 15.0 and 5.3 Hz), -129.67 (dd, *J*<sub>C-F</sub> = 21.4 and 5.3 Hz) -141.63 (dd, *J*<sub>C-F</sub> = 21.4 and 15.0 Hz); HRMS(EI) Calcd for C<sub>16</sub>H<sub>15</sub>F<sub>3</sub>O<sub>2</sub> [M<sup>+</sup>]: 296.1024, Found 296.1019; IR (KBr) ν (cm<sup>-1</sup>) : 3059, 2953, 1697, 1519, 1433, 1336, 1284, 1187.

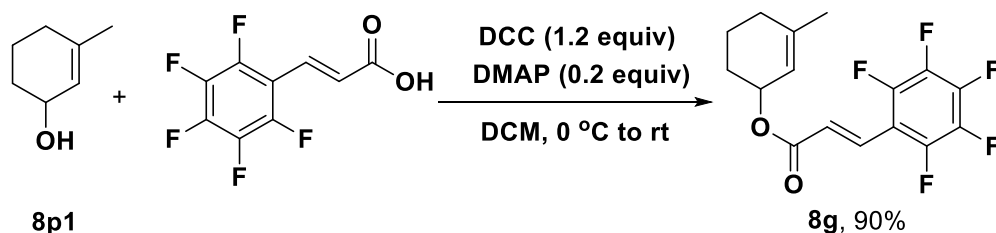

**(E)-3-Methylcyclohex-2-en-1-yl 3-(perfluorophenyl)acrylate (8g):** To the mixture of **8p1** (224 mg, 2.0 mmol, 1.0 equiv), (*E*)-3-( perfluorophenyl)acrylic acid (571 mg, 2.4 mmol, 1.2 equiv) and 4-dimethylaminopyridine (DMAP, 49 mg, 0.4 mmol, 0.2

equiv) in DCM (20 mL) was added dicyclohexylcarbodiimide (DCC, 495 mg, 2.4 mmol, 1.2 equiv) in portions at 0 °C. After 30 min, the reaction mixture was filtered. The solvent was evaporated under reduced pressure. The crude product was purified by column chromatography on silica gel (Petroleum ether/ EtOAc = 30/1) to give **8g** (598 mg, 90% yield). White solid; m.p. 56.0-56.3 °C; <sup>1</sup>H NMR (400 MHz, CDCl<sub>3</sub>) δ 7.62 (d, *J* = 16.4 Hz, 1H), 6.74 (d, *J* = 16.4 Hz, 1H), 5.53 (s, 1H), 5.39 (s, 1H), 2.06-1.96 (m, 2H), 1.86-1.76 (m, 3H), 1.73 (s, 3H), 1.70 – 1.64 (m, 1H); <sup>13</sup>C NMR (150 MHz, CDCl<sub>3</sub>) δ 165.4, 146.4-144.6 (m, 1C), 142.4-140.5 (m, 1C), 141.4, 138.6-136.7 (m, 1C), 127.5, 126.7 (t, *J*<sub>C-F</sub> = 7.9 Hz), 119.5, 109.8 (td, *J*<sub>C-F</sub> = 13.4 and 3.9 Hz), 69.5, 29.7, 27.8, 23.4, 18.8; <sup>19</sup>F NMR (376 MHz, CDCl<sub>3</sub>) δ -139.50--139.57(m), -151.45 (tt, *J*<sub>C-F</sub> = 20.8 and 2.7 Hz), -161.62--161.76 (m); HRMS(EI) Calcd for C<sub>16</sub>H<sub>13</sub>F<sub>5</sub>O<sub>2</sub> [M<sup>+</sup>]: 332.0836, Found 332.0841; IR (KBr) ν(cm<sup>-1</sup>) : 3429, 2939, 1716, 1524, 1500, 1293,1263, 1189, 1151,1018, 984, 962, 913.

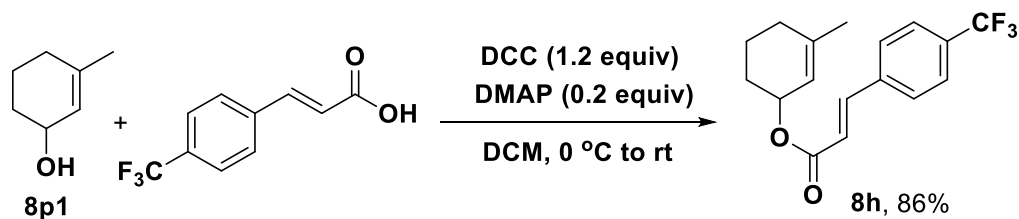

**(E)-3-Methylcyclohex-2-en-1-yl 3-(4-(trifluoromethyl)phenyl)acrylate (8h):** To the mixture of **8p1** (224 mg, 2.0 mmol, 1.0 equiv), (*E*)-3-(4-(trifluoromethyl)phenyl)acrylic acid (519 mg, 2.4 mmol, 1.2 equiv) and 4-dimethylaminopyridine (DMAP, 49 mg, 0.4 mmol, 0.2 equiv) in DCM (20 mL) was added dicyclohexylcarbodiimide (DCC, 495 mg, 2.4 mmol, 1.2 equiv) in portions at 0 °C. After 30 min, the reaction mixture was filtered. The solvent was evaporated under reduced pressure. The crude product was purified by column chromatography on silica gel (Petroleum ether/ EtOAc = 30/1) to give **8h** (534 mg, 86% yield). Colorless oil; <sup>1</sup>H NMR (400 MHz, CDCl<sub>3</sub>) δ 7.67 (d, *J* = 16.0 Hz, 1H), 7.64-7.59 (m, 4H), 6.51 (d, *J* = 16.0 Hz, 1H), 5.54 (s, 1H), 5.39 (s, 1H), 2.04 – 1.91 (m, 2H), 1.86-1.76 (m, 3H), 1.73 (s, 3H), 1.69 – 1.62 (m, 1H); <sup>13</sup>C NMR (100 MHz, CDCl<sub>3</sub>) δ 166.1, 142.4, 141.4, 137.9 (d, *J*<sub>C-F</sub> = 1.2 Hz), 131.5(q, *J*<sub>C-F</sub> = 32.5 Hz), 128.1, 125.8 (q, *J*<sub>C-F</sub> = 3.7 Hz), 123.8 (q, *J*<sub>C-F</sub> = 270.5 Hz), 121.3, 119.8, 69.2, 29.9, 28.0, 23.7, 19.0; <sup>19</sup>F NMR (376 MHz, CDCl<sub>3</sub>) δ -62.87; HRMS(EI) Calcd for



C<sub>17</sub>H<sub>17</sub>F<sub>3</sub>O<sub>2</sub> [M<sup>+</sup>]: 310.1181, Found 310.1174; IR (KBr)  $\nu(\text{cm}^{-1})$  : 2938, 1711, 1642, 1325, 1173, 1129, 1068, 981, 917, 834.

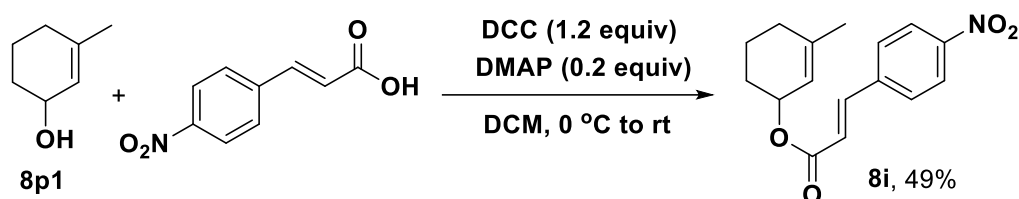

**(E)**-3-Methylcyclohex-2-en-1-yl 3-(4-nitrophenyl)acrylate (**8i**): To the mixture of **8p1** (224 mg, 2.0 mmol, 1.0 equiv), *(E)*-3-(4-nitrophenyl)acrylic acid (464 mg, 2.4 mmol, 1.2 equiv) and 4-dimethylaminopyridine (DMAP, 49 mg, 0.4 mmol, 0.2 equiv) in DCM (20 mL) was added dicyclohexylcarbodiimide (DCC, 495 mg, 2.4 mmol, 1.2 equiv) in portions at 0 °C. After 30 min, the reaction mixture was filtered. The solvent was evaporated under reduced pressure. The crude product was purified by column chromatography on silica gel (Petroleum ether/ EtOAc = 30/1) to give **8i** (141 mg, 49% yield). White solid; mp 117.8-118.0 °C; <sup>1</sup>H NMR (400 MHz, CDCl<sub>3</sub>)  $\delta$  8.24 (d, *J* = 8.7 Hz, 1H), 7.71 – 7.65 (m, 3H), 6.56 (d, *J* = 16.0 Hz, 1H), 5.54 (s, 1H), 5.40 (s, 1H), 2.06 – 1.93 (m, 2H), 1.86 – 1.77 (m, 3H), 1.74 (s, 3H), 1.70 – 1.65 (m, 1H); <sup>13</sup>C NMR (100 MHz, CDCl<sub>3</sub>)  $\delta$  165.7, 148.4, 141.7, 141.3, 140.7, 128.5, 124.1, 123.1, 119.6, 69.5, 29.9, 28.0, 23.8, 19.0; HRMS(EI) Calcd for C<sub>16</sub>H<sub>17</sub>NO<sub>4</sub> [M<sup>+</sup>]: 287.1158, Found; 287.1161; IR (KBr)  $\nu(\text{cm}^{-1})$  : 2939, 2869, 1704, 1640, 1600, 1520, 1347, 1206, 1180, 1165, 1110, 984.

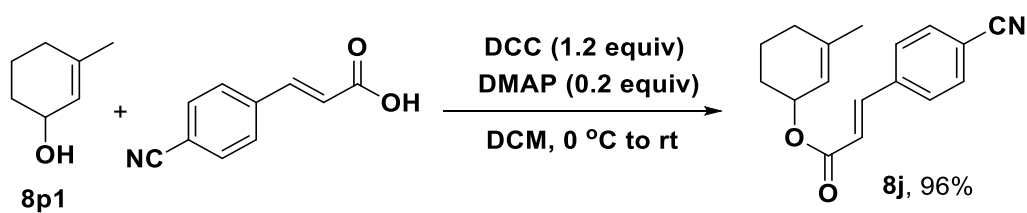

**(E)**-3-Methylcyclohex-2-en-1-yl 3-(4-cyanophenyl)acrylate (**8j**): To the mixture of **8p1** (224 mg, 2.0 mmol, 1.0 equiv), *(E)*-3-(4-cyanophenyl)acrylic acid (416 mg, 2.4 mmol, 1.2 equiv) and 4-dimethylaminopyridine (DMAP, 49 mg, 0.4 mmol, 0.2 equiv) in DCM (20 mL) was added dicyclohexylcarbodiimide (DCC, 495 mg, 2.4 mmol, 1.2 equiv) in portions at 0 °C. After 30 min, the reaction mixture was filtered. The solvent

was evaporated under reduced pressure. The crude product was purified by column chromatography on silica gel (Petroleum ether/ EtOAc = 30/1) to give **8j** (513 mg, 96% yield). White solid; mp 83.5-83.7 °C; <sup>1</sup>H NMR (400 MHz, CDCl<sub>3</sub>) δ 7.71 – 7.55 (m, 5H), 6.52 (d, *J* = 16.0 Hz, 1H), 5.53 (s, 1H), 5.39 (s, 1H), 2.07 – 1.92 (m, 2H), 1.86 – 1.76 (m, 3H), 1.73 (s, 3H), 1.70 – 1.64 (m, 1H); <sup>13</sup>C NMR (100 MHz, CDCl<sub>3</sub>) δ 165.8, 141.8, 141.6, 138.8, 132.6, 128.3, 122.4, 119.7, 118.4, 113.2, 69.4, 29.9, 28.0, 23.8, 19.0; HRMS(EI) Calcd for C<sub>17</sub>H<sub>17</sub>NO<sub>2</sub> [M<sup>+</sup>]: 267.1259, Found; 267.1247; IR (KBr) (cm<sup>-1</sup>) : 3432, 2938, 2229, 1707, 1639, 1329, 1306, 1279, 1254, 1205, 1181, 985, 915, 831.

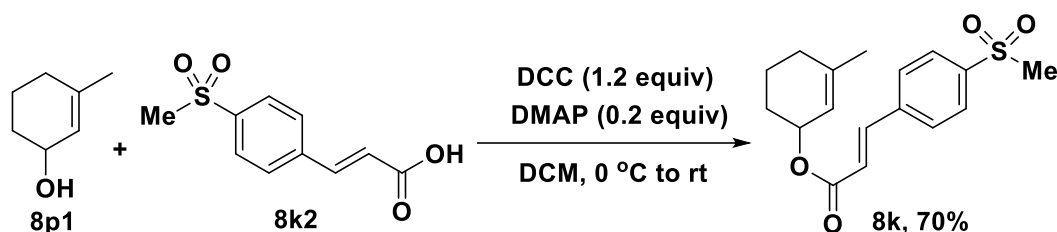

**3-Methylcyclohex-2-en-1-yl (E)-3-(4-(methylsulfonyl)phenyl)acrylate (8k):** To the mixture of **8p1** (224 mg, 2.0 mmol, 1.0 equiv), (*E*)-3-(4-(methylsulfonyl)phenyl)acrylic acid (**8k2**) (543 mg, 2.4 mmol, 1.2 equiv) and 4-dimethylaminopyridine (DMAP, 49 mg, 0.4 mmol, 0.2 equiv) in DCM (20 mL) was added dicyclohexylcarbodiimide (DCC, 495 mg, 2.4 mmol, 1.2 equiv) in portions at 0 °C. After 30 min, the reaction mixture was filtered. The solvent was evaporated under reduced pressure. The crude product was purified by column chromatography on silica gel (Petroleum ether/ EtOAc = 20/1) to give **8k** (448 mg, 70% yield). White solid; mp 195.2-195.4 °C; <sup>1</sup>H NMR (400 MHz, CDCl<sub>3</sub>) δ 7.94 (d, *J* = 8.2 Hz, 2H), 7.68 (d, *J* = 8.2 Hz, 2H), 7.68 (d, *J* = 15.8 Hz, 1H), 6.55 (d, *J* = 16.1 Hz, 1H), 5.53 (s, 1H), 5.38 (s, 1H), 3.06 (s, 3H), 2.05 – 1.92 (m, 2H), 1.85-1.77 (m, 3H), 1.73 (s, 3H), 1.70-1.64 (m, 1H); <sup>13</sup>C NMR (100 MHz, CDCl<sub>3</sub>) δ 165.8, 141.7, 141.6, 141.3, 139.8, 128.6, 127.9, 122.6, 119.7, 69.4, 44.4, 29.9, 28.0, 23.7, 19.0; HRMS(EI) Calcd for C<sub>17</sub>H<sub>20</sub>O<sub>4</sub>S [M + Na]<sup>+</sup> : 343.0980, Found 343.0972; IR (KBr) (cm<sup>-1</sup>): 1707, 1642, 1301, 1142, 960, 831, 774.

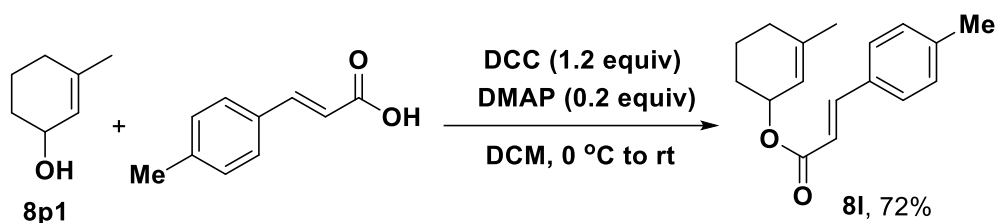

**(E)-3-Methylcyclohex-2-en-1-yl 3-(p-tolyl)acrylate (8I):** To the mixture of **8p1** (224 mg, 2.0 mmol, 1.0 equiv), (*E*)-3-(p-tolyl)acrylic acid (389 mg, 2.4 mmol, 1.2 equiv) and 4-dimethylaminopyridine (DMAP, 49 mg, 0.4 mmol, 0.2 equiv) in DCM (20 mL) was added dicyclohexylcarbodiimide (DCC, 495 mg, 2.4 mmol, 1.2 equiv) in portions at 0 °C. After 30 min, the reaction mixture was filtered. The solvent was evaporated under reduced pressure. The crude product was purified by column chromatography on silica gel (Petroleum ether/ EtOAc = 30/1) to give **8I** (369 mg, 72% yield). Colorless oil; <sup>1</sup>H NMR (400 MHz, CDCl<sub>3</sub>) δ 7.66 (d, *J* = 16.0 Hz, 1H), 7.41 (d, *J* = 8.0 Hz, 2H), 7.17 (d, *J* = 7.9 Hz, 2H), 6.40 (d, *J* = 16.0 Hz, 1H), 5.55 (s, 1H), 5.39 (s, 1H), 2.36 (s, 3H), 2.06-1.96 (m, 2H), 1.91 – 1.76 (m, 3H), 1.73 (s, 3H), 1.69 – 1.60 (m, 1H); <sup>13</sup>C NMR (100 MHz, CDCl<sub>3</sub>) δ 166.8, 144.3, 141.0, 140.4, 131.7, 129.5, 127.9, 120.1, 117.6, 68.7, 29.9, 28.0, 23.7, 21.4, 19.0; HRMS(EI) Calcd for C<sub>17</sub>H<sub>20</sub>O<sub>2</sub> [M<sup>+</sup>]: 256.1463, Found 256.1452; IR (KBr) ν(cm<sup>-1</sup>): 2936, 1707, 1636, 1304, 1253, 1164, 983, 918, 813.

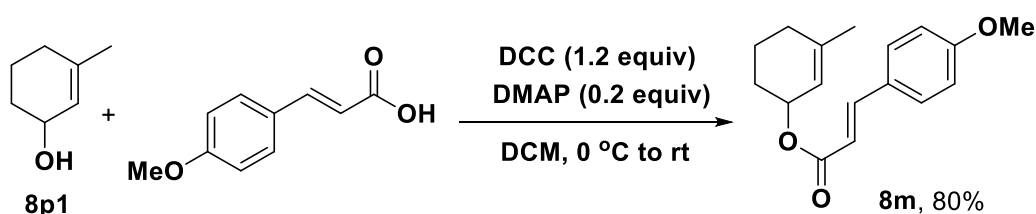

**(E)-3-Methylcyclohex-2-en-1-yl 3-(4-methoxyphenyl)acrylate (8m):** To the mixture of **8p1** (224 mg, 2.0 mmol, 1.0 equiv), (*E*)-3-(4-methoxyphenyl)acrylic acid (428 mg, 2.4 mmol, 1.2 equiv) and 4-dimethylaminopyridine (DMAP, 49 mg, 0.4 mmol, 0.2 equiv) in DCM (20 mL) was added dicyclohexylcarbodiimide (DCC, 495 mg, 2.4 mmol, 1.2 equiv) in portions at 0 °C. After 30 min, the reaction mixture was filtered. The solvent was evaporated under reduced pressure. The crude product was purified by column chromatography on silica gel (Petroleum ether/ EtOAc = 30/1) to give **8m** (436 mg, 80% yield). Colorless oil; <sup>1</sup>H NMR (400 MHz, CDCl<sub>3</sub>) δ 7.62 (d, *J* = 16.0 Hz, 1H), 7.44 (d, *J* = 8.7 Hz, 2H), 6.87 (d, *J* = 8.7 Hz, 2H), 6.30 (d, *J* = 16.0 Hz, 1H), 5.53 (s,

1H), 5.37 (s, 1H), 3.80 (s, 3H), 2.04 – 1.94 (m, 2H), 1.84 – 1.74 (m, 3H), 1.71 (s, 3H), 1.67 – 1.60 (m, 1H); <sup>13</sup>C NMR (100 MHz, CDCl<sub>3</sub>) δ 166.9, 161.1, 143.9, 140.9, 129.5, 127.1, 120.1, 116.1, 114.1, 68.5, 55.2, 29.8, 28.0, 23.7, 19.0; HRMS(EI) Calcd for C<sub>17</sub>H<sub>20</sub>O<sub>3</sub> [M<sup>+</sup>]: 272.1412, Found 272.1417; IR (KBr) ν (cm<sup>-1</sup>): 2937, 2836, 1705, 1634, 1604, 1513, 1252, 1171, 1031, 982, 918, 829.

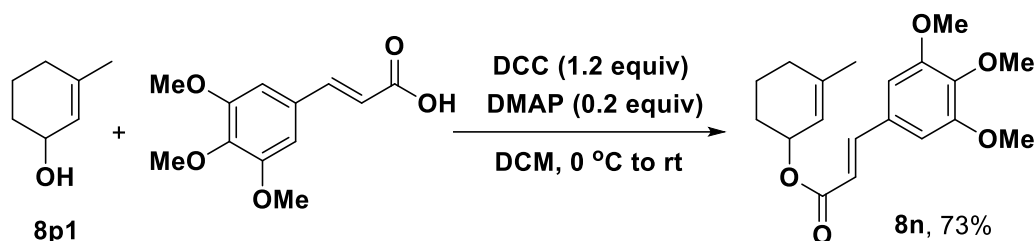

**(E)-3-Methylcyclohex-2-en-1-yl 3-(3,4,5-trimethoxyphenyl)acrylate (8n):** To the mixture of **8p1** (224 mg, 2.0 mmol, 1.0 equiv), (*E*)-3-(3,4,5-trimethoxyphenyl)acrylic acid (572 mg, 2.4 mmol, 1.2 equiv) and 4-dimethylaminopyridine (DMAP, 49 mg, 0.4 mmol, 0.2 equiv) in DCM (20 mL) was added dicyclohexylcarbodiimide (DCC, 495 mg, 2.4 mmol, 1.2 equiv) in portions at 0 °C. After 30 min, the reaction mixture was filtered. The solvent was evaporated under reduced pressure. The crude product was purified by column chromatography on silica gel (Petroleum ether/ EtOAc = 30/1) to give **8n** (486 mg, 73% yield). Colorless oil; <sup>1</sup>H NMR (400 MHz, CDCl<sub>3</sub>) δ 7.56 (d, *J* = 15.9 Hz, 1H), 6.72 (s, 2H), 6.33 (d, *J* = 15.9 Hz, 1H), 5.51 (s, 1H), 5.36 (s, 1H), 3.84 (s, 9H), 2.02-1.89 (m, 2H), 1.83-1.74 (m, 3H), 1.70 (s, 3H), 1.67 – 1.61 (m, 1H); <sup>13</sup>C NMR (100 MHz, CDCl<sub>3</sub>) δ 166.5, 153.2, 144.2, 141.2, 139.8, 129.9, 119.9, 117.9, 105.0, 68.7, 60.8, 56.0, 29.8, 28.0, 23.7, 18.9; HRMS(EI) Calcd for C<sub>19</sub>H<sub>24</sub>O<sub>5</sub> [M<sup>+</sup>]: 332.1624, Found 332.1629; IR (KBr) ν (cm<sup>-1</sup>): 2938, 1704, 1636, 1582, 1505, 1455, 1419, 1317, 1246, 1152, 1005, 917, 828.

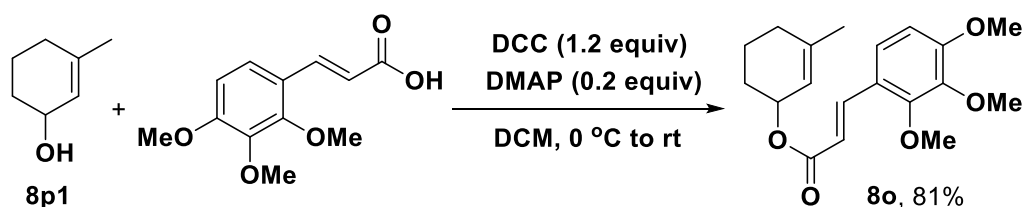

**7-Methyl-4-(2,3,4-trimethoxyphenyl)-1-oxaspiro[4.5]dec-6-en-2-one (8o):** To the mixture of **8p1** (224 mg, 2.0 mmol, 1.0 equiv), (*E*)-3-(2,3,4-trimethoxyphenyl)acrylic acid (572 mg, 2.4 mmol, 1.2 equiv) and 4-dimethylaminopyridine (DMAP, 49 mg, 0.4

mmol, 0.2 equiv) in DCM (20 mL) was added dicyclohexylcarbodiimide (DCC, 495 mg, 2.4 mmol, 1.2 equiv) in portions at 0 °C. After 30 min, the reaction mixture was filtered. The solvent was evaporated under reduced pressure. The crude product was purified by column chromatography on silica gel (Petroleum ether/ EtOAc = 30/1) to give **8o** (539 mg, 81% yield). Colorless oil; <sup>1</sup>H NMR (400 MHz, CDCl<sub>3</sub>) δ 7.85 (d, *J* = 16.1 Hz, 1H), 7.23 (d, *J* = 8.8 Hz, 1H), 6.66 (d, *J* = 8.8 Hz, 1H), 6.40 (d, *J* = 16.1 Hz, 1H), 5.52 (s, 1H), 5.36 (s, 1H), 3.89 (s, 3H), 3.87 (s, 3H), 3.85 (s, 3H), 2.02-1.89 (m, 2H), 1.83 – 1.75 (m, 3H), 1.71 (s, 3H), 1.67 – 1.61(m, 1H); <sup>13</sup>C NMR (100 MHz, CDCl<sub>3</sub>) δ 167.2, 155.3, 153.2, 142.2, 140.9, 139.3, 123.0, 121.5, 120.2, 117.5, 107.5, 68.6, 61.3, 60.8, 55.9, 29.9, 28.1, 23.7, 19.1; HRMS(EI) Calcd for C<sub>19</sub>H<sub>24</sub>O<sub>5</sub> [M<sup>+</sup>]: 332.1624, Found 332.1618; IR (KBr) ν(cm<sup>-1</sup>) : 2938, 1704, 1630, 1594, 1496, 1465, 1415, 1296, 1256, 1159, 1098.

## 2 . Preparation of compound **8p**, **8q** and **8r**

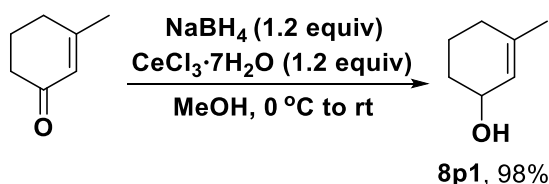

**3-Methylcyclohex-2-en-1-ol<sup>1</sup> (8p1)**: To the solution of 3-Methyl-2-cyclohexen-1-one (2.2 g, 20 mmol, 1.0 equiv) and Cerium(III) chloride heptahydrate (8.94 g, 24 mmol, 1.2 equiv) in MeOH (50 mL) was added NaBH<sub>4</sub> (908 mg, 24 mmol, 1.2 equiv) at 0 °C, the reaction was stirred at room temperature for 30 min. The reaction mixture was extracted by DCM (15 mL x 3), the combined organic phase was dried over anhydrous Na<sub>2</sub>SO<sub>4</sub>, After evaporation of the solvent under reduced pressure (the temperature should be kept below 20 °C), the residue light yellow oil was pure enough for next step without further purification **8p1** (2.2 g, 98% yield). The data is consistent with the literature <sup>1</sup>. Colorless oil; <sup>1</sup>H NMR (400 MHz, CDCl<sub>3</sub>) δ 5.48 (s, 1H), 4.15 (s, 1H), 1.95 – 1.87 (m, 2H), 1.78 – 1.72 (m, 3H), 1.67 (s, 3H), 1.58-1.51 (m, 1H); <sup>13</sup>C NMR (100 MHz, CDCl<sub>3</sub>) δ 138.6, 124.2, 65.8, 31.6, 30.0, 23.6, 19.0.

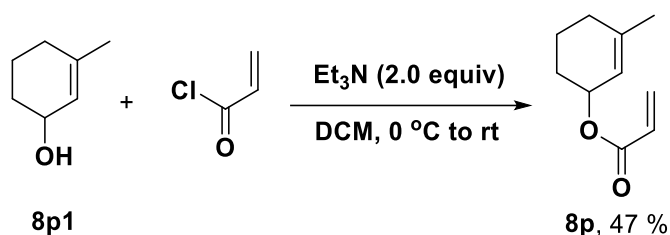

**3-Methylcyclohex-2-en-1-yl acrylate (8p):** Acryloyl chloride (1.2 equiv) was added dropwise into the mixture of 3-Methyl-2-cyclohexen-1-ol (1.0 equiv) and Et<sub>3</sub>N (2.0 equiv) in DCM (20 mL) under 0 °C. After 30 minutes, the reaction mixture was extracted by DCM (15 mL x 3). The combined organic phase was dried over anhydrous Na<sub>2</sub>SO<sub>4</sub>. After evaporation of the solvent under reduced pressure, the residue was purified by column chromatography (petroleum ether/ethyl acetate = 20/1) to give **8p** (772 mg, 47% yield). Colorless oil; <sup>1</sup>H NMR (400 MHz, CDCl<sub>3</sub>) δ 6.38 (dd, *J* = 17.3 and 1.4 Hz, 1H), 6.10 (dd, *J* = 17.3 and 10.4 Hz, 1H), 5.78 (dd, *J* = 10.4 and 1.4 Hz, 1H), 5.49 (s, 1H), 5.32 (s, 1H), 2.02-1.89 (m, 2H), 1.83 – 1.73 (m, 3H), 1.71 (s, 3H), 1.67-1.60 (m, 1H); <sup>13</sup>C NMR (100 MHz, CDCl<sub>3</sub>) δ 166.0, 141.2, 130.2, 129.0, 119.9, 68.9, 29.9, 28.0, 23.7, 19.0; HRMS(EI) Calcd for C<sub>10</sub>H<sub>14</sub>O<sub>2</sub> [M<sup>+</sup>]: 166.0994, Found 166.0993; IR (film) ν(cm<sup>-1</sup>): 2938, 1721, 1406, 1270, 1043, 982, 914, 811.

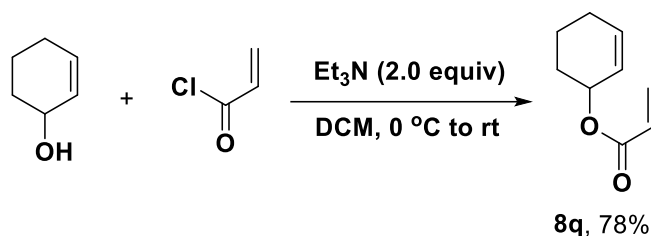

**Cyclohex-2-en-1-yl acrylate (8q):** Acryloyl chloride (1.2 equiv) was added dropwise into the mixture of 2-cyclohexen-1-ol (1.0 equiv) and Et<sub>3</sub>N (2.0 equiv) in DCM (20 mL) under 0 °C. After 30 minutes, the reaction mixture was extracted by DCM (15 mL x 3). The combined organic phase was dried over anhydrous Na<sub>2</sub>SO<sub>4</sub>. After evaporation of the solvent under reduced pressure, the residue was purified by column chromatography (petroleum ether/ethyl acetate = 20/1) to give **8q** (237 mg, 78% yield). Colorless oil; <sup>1</sup>H NMR (400 MHz, CDCl<sub>3</sub>) δ 6.39 (dd, *J* = 17.3 and 1.2 Hz, 1H), 6.11 (dd, *J* = 17.3 and 10.4 Hz, 1H), 6.03-5.88 (m, 1H), 5.79 (dd, *J* = 10.4 and 1.2 Hz, 1H), 5.72 (dd, *J* = 6.0 and 1.6 Hz, 1H), 5.33 (s, 1H), 2.12-1.99 (m, 2H), 1.92-1.86 (m, 1H), 1.80-1.73 (m, 2H), 1.68 – 1.61 (m, 1H); <sup>13</sup>C NMR (100 MHz, CDCl<sub>3</sub>) δ 165.8, 132.7, 130.3, 128.9,

125.5, 68.2, 28.2, 24.8, 18.8; HRMS(EI) Calcd for C<sub>9</sub>H<sub>12</sub>O<sub>2</sub> [M<sup>+</sup>]: 152.0837, Found 152.0839; IR (KBr) v(cm<sup>-1</sup>) : 3445, 1723, 1635, 1407, 1385, 1269, 1193, 1048, 941, 908.

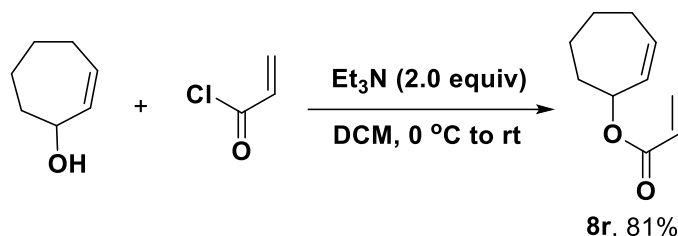

**Cyclohept-2-en-1-yl acrylate (8r):** To the solution of cyclohept-2-en-1-ol (1.0 equiv) in MeOH was added NaBH<sub>4</sub> (1.2 equiv) at 0 °C. The reaction mixture was stirred at 0 °C for 30 min and extracted by DCM (15 mL x 3). The combined organic phase was dried over anhydrous Na<sub>2</sub>SO<sub>4</sub>. After evaporation of the solvent under reduced pressure, the residue light yellow oil was used for next step directly without further purification. Acryloyl chloride (1.2 equiv) was added dropwise into the mixture of cyclohept-2-en-1-ol (1.0 equiv) and Et<sub>3</sub>N (2.0 equiv) in DCM (20 mL) under 0 °C. After 30 minutes, the reaction mixture was extracted by DCM (15 mL x 3). The combined organic phase was dried over anhydrous Na<sub>2</sub>SO<sub>4</sub>. After evaporation of the solvent under reduced pressure, the residue was purified by column chromatography (petroleum ether/ethyl acetate = 20/1) to give **8r** (269 mg, 81% yield). Colorless oil; <sup>1</sup>H NMR (400 MHz, CDCl<sub>3</sub>) δ 6.39 (dd, *J* = 17.3 and 1.3 Hz, 1H), 6.12 (dd, *J* = 17.3 and 10.4 Hz, 1H), 5.86 – 5.83 (m, 1H), 5.80 (dd, *J* = 10.3 and 1.3 Hz, 1H), 5.66 (d, *J* = 11.6 Hz, 1H), 5.47 (d, *J* = 8.7 Hz, 1H), 2.24 – 2.17 (m, 1H), 2.12-2.05 (m, 1H), 1.96-1.87 (m, 2H), 1.75 – 1.62 (m, 3H), 1.46-1.37 (m, 1H); <sup>13</sup>C NMR (100 MHz, CDCl<sub>3</sub>) δ 165.5, 133.4, 131.7, 130.4, 128.9, 74.3, 32.7, 28.4, 26.6, 26.5; HRMS(EI) Calcd for C<sub>10</sub>H<sub>14</sub>O<sub>2</sub> [M<sup>+</sup>]: 166.0994, Found 166.0995; IR (film) (cm<sup>-1</sup>): 2927, 1729, 1457, 1262, 1098, 1028, 800.

### 3. Preparation of compound 8s, 8t, 8u and 8v.

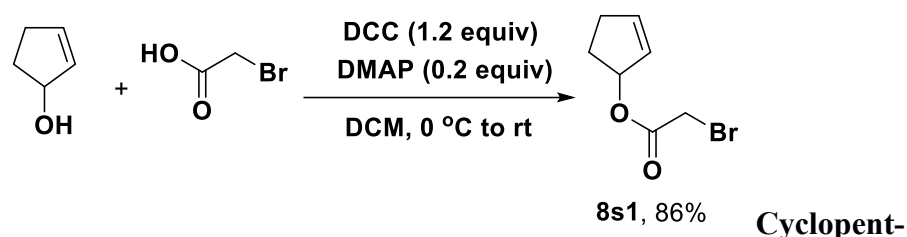

**2-en-1-yl 2-bromoacetate (8s1):** To the solution of cyclopent-2-en-1-one (1.0 equiv) in MeOH was added NaBH<sub>4</sub> (1.2 equiv) at 0 °C. The reaction was stirred at 0 °C for 30 min. The reaction mixture was extracted by DCM (15 mL x 3). The combined organic phase was dried over anhydrous Na<sub>2</sub>SO<sub>4</sub>. After evaporation of the solvent under reduced pressure (the temperature should be kept below 20 °C), the residue light yellow oil was used for next step without further purification. To the mixture of cyclopent-2-en-1-ol (561 mg, 5.0 mmol, 1.0 equiv), bromoacetic acid (834 mg, 6.0 mmol, 1.2 equiv) and 4-dimethylaminopyridine (DMAP, 122 mg, 1.0 mmol, 0.2 equiv) in DCM (30 mL) was added dicyclohexylcarbodiimide (DCC, 1.24 g, 6.0 mmol, 1.2 equiv) in portions at 0 °C. After 30 min, the reaction mixture was filtered. After evaporation of the solvent under reduced pressure, the crude product was purified by column chromatography on silica gel (Petroleum ether/ EtOAc = 50/1) to give the desired ester products **8s1** (886 mg, 86% yield). Colorless oil; <sup>1</sup>H NMR (600 MHz, CDCl<sub>3</sub>) δ 6.20-6.12 (m, 1H), 5.82 (dd, *J* = 5.4 and 2.1 Hz, 1H), 5.74 (dd, *J* = 5.4 and 2.1 Hz, 1H), 3.79 (s, 2H), 2.55 – 2.51 (m, 1H), 2.35 – 2.26 (m, 2H), 1.87 – 1.82 (m, 1H); <sup>13</sup>C NMR (150 MHz, CDCl<sub>3</sub>) δ 167.1, 138.6, 128.4, 82.6, 31.0, 29.5, 26.3; HRMS(EI) Calcd for C<sub>7</sub>H<sub>9</sub>BrO<sub>2</sub> [M<sup>+</sup>]: 203.9786, Found 203.9783; IR (film) ν (cm<sup>-1</sup>): 2931, 1732, 1421, 1279, 1171, 1028, 874, 739.

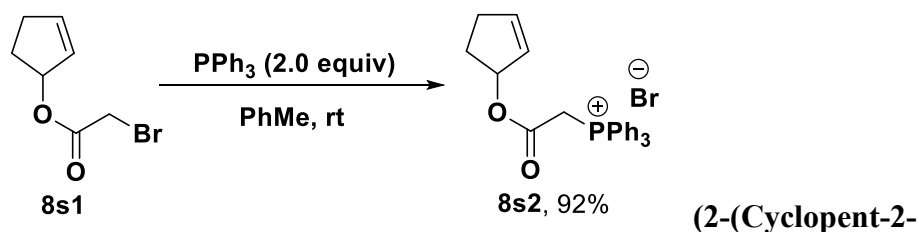

**en-1-yloxy)-2-oxoethyl)triphenylphosphonium bromide (8s2):** The obtained ester **8s1** (1.0 g, 4.29 mmol, 1.0 equiv) and PPh<sub>3</sub> (2.25 g, 8.58 mmol, 2.0 equiv) were stirred in toluene (30 mL) at room temperature for 48 h. A white precipitate was formed from the reaction mixture. After filtered, the white solid was collected and dried at room



temperature to give the desired product **8s2** (1.84 g, 92%). White solid; mp 127.5-127.8 °C; <sup>1</sup>H NMR (600 MHz, CDCl<sub>3</sub>) δ 7.76-7.72 (m, 6H), 7.68 (t, *J* = 7.2 Hz, 3H), 7.56 (br, 6H), 5.89 (s, 1H), 5.35 (s, 2H), 5.23 (d, *J* = 14.0 Hz, 2H), 2.17 – 2.05 (m, 2H), 1.94-1.88 (m, 1H), 1.38 – 1.34 (m, 1H); <sup>13</sup>C NMR (150 MHz, CDCl<sub>3</sub>) δ 163.5(d, *J*<sub>c-p</sub> = 4.0 Hz), 138.8, 134.9 (d, *J*<sub>c-p</sub> = 2.8 Hz), 133.6 (d, *J*<sub>c-p</sub> = 10.7 Hz), 129.9 (d, *J*<sub>c-p</sub> = 13.1 Hz), 127.3, 117.8, 117.2, 83.1, 32.9 (d, *J*<sub>c-p</sub> = 54.0 Hz), 30.6, 28.8; <sup>31</sup>P NMR (242 MHz, CDCl<sub>3</sub>) δ 20.86; HRMS(EI) Calcd for C<sub>25</sub>H<sub>24</sub>BrO<sub>2</sub>P [M<sup>+</sup>]: 466.0697, Found 466.0709; IR (film) ν (cm<sup>-1</sup>): 1705, 1585, 1435, 1309, 1196, 1153, 1028, 868 .

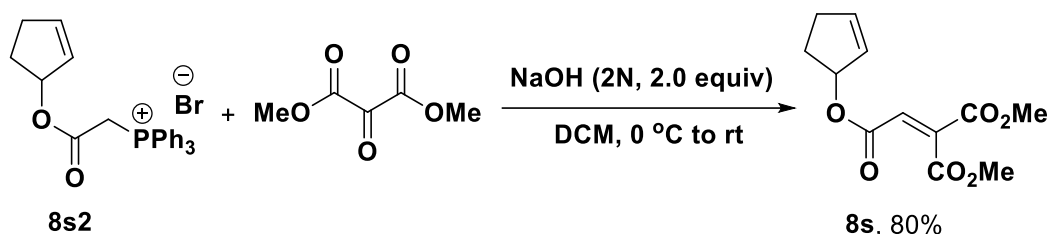

**2-(Cyclopent-2-en-1-yl) 1,1-dimethyl ethene-1,1,2-tricarboxylate (8s):** **8s2** (1.49 g, 3.0 mmol, 1.0 equiv) and dimethyl keto malonate (439 mg, 3.0 mmol, 1.0 equiv) were dissolved in DCM (30 mL), and then cooled to 0 °C. A aqueous solution of NaOH (240 mg, 6.0 mmol, 2.0 equiv, 2N) was added dropwise into the solution. The reaction was stirred at 0 °C for 30 min, and then extracted by DCM (15 mL x 3). The combined organic phase was dried over anhydrous Na<sub>2</sub>SO<sub>4</sub>. After evaporation of the solvent under reduced pressure, the crude product was purified by column chromatography on silica gel (Petroleum ether/ EtOAc = 50/1) to give the desired esters **8s** (610 mg, 80%). Colorless oil; <sup>1</sup>H NMR (400 MHz, CDCl<sub>3</sub>) δ 6.85 (s, 1H), 6.20-6.10 (m, 1H), 5.90-5.75 (m, 1H), 5.70-5.60 (m, 1H), 3.85 (s, 3H), 3.82 (s, 3H), 2.55 – 2.45 (m, 1H), 2.36 – 2.23 (m, 2H), 1.89 – 1.81 (m, 1H); <sup>13</sup>C NMR (100 MHz, CDCl<sub>3</sub>) δ 164.6, 163.3, 162.6, 138.6, 137.8, 131.1, 128.4, 82.2, 53.2, 52.8, 31.0, 29.5; HRMS(EI) Calcd for C<sub>12</sub>H<sub>15</sub>O<sub>6</sub> [M + H]<sup>+</sup>: 255.0869, Found 255.0864; IR (film) ν (cm<sup>-1</sup>): 2956, 1720, 1456, 1070, 1028, 920, 777.

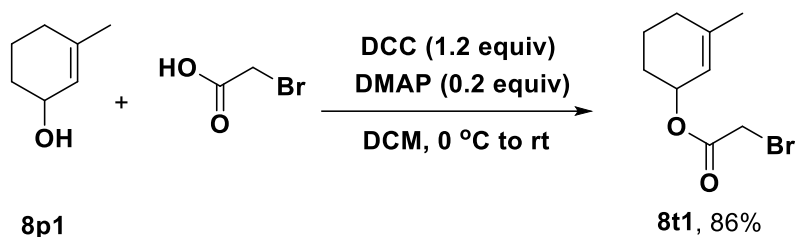

**Cyclohex-2-en-1-yl 2-bromoacetate (8t1):** To the mixture of **8p1** (561 mg, 5.0 mmol, 1.0 equiv), bromoacetic acid (834 mg, 6.0 mmol, 1.2 equiv) and 4-dimethylaminopyridine (DMAP, 122 mg, 1.0 mmol, 0.2 equiv) in DCM (20 mL) was added dicyclohexylcarbodiimide (DCC, 1.24 g, 6.0 mmol, 1.2 equiv) in portions at 0 °C. After 30 min, the reaction mixture was filtered. The solvent was evaporated under reduced pressure. The crude product was purified by column chromatography on silica gel (Petroleum ether/ EtOAc = 50/1) to give the desired ester products **8t1** (1.0 g, 86% yield). Colorless oil;  $^1\text{H NMR}$  (400 MHz,  $\text{CDCl}_3$ )  $\delta$  5.47 (s, 1H), 5.28 (s, 1H), 3.80 (s, 2H), 2.01-1.93(m, 2H), 1.78-1.73 (m, 3H), 1.70 (s, 3H), 1.67-1.59 (m, 1H);  $^{13}\text{C NMR}$  (100 MHz,  $\text{CDCl}_3$ )  $\delta$  166.9, 142.1, 119.0, 71.0, 29.8, 27.6, 26.5, 23.7, 18.7; HRMS(EI) Calcd for  $\text{C}_9\text{H}_{13}\text{BrO}_2$  [ $\text{M}^+$ ]: 233.0177, Found 233.0171; IR (KBr)  $\nu(\text{cm}^{-1})$  : 3368, 2945, 2833, 1728, 1450, 1285, 1032.

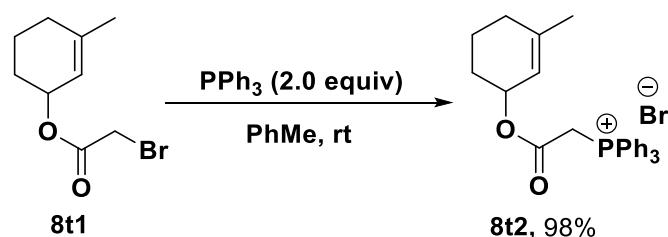

**(2-(Cyclohex-2-en-1-yloxy)-2-oxoethyl)triphenylphosphonium bromide (8t2):** The obtained ester **8t1** (1.0 g, 4.29 mmol, 1.0 equiv) and  $\text{PPh}_3$  (2.25 g, 8.58 mmol, 2.0 equiv) were stirred in toluene (30 mL) at room temperature for 48 h. A white precipitate was formed from the reaction mixture. After filtered, the white solid was collected and dried at room temperature to give the desired product **8t2** (2.08g, 98%). White solid; mp 129.6-129.8 °C;  $^1\text{H NMR}$  (400 MHz,  $\text{CDCl}_3$ )  $\delta$  7.89 (dd,  $J = 13.4$  and  $7.5$  Hz, 6H), 7.79 – 7.74 (m, 3H), 7.66 (tt,  $J = 7.7$  and  $3.5$  Hz, 6H), 5.54-5.41 (m, 2H), 5.12 (s, 1H), 5.05 (s, 1H), 1.88 – 1.83 (m, 2H), 1.72 (s, 3H), 1.60 – 1.46 (m, 4H);  $^{13}\text{C NMR}$  (100 MHz,  $\text{CDCl}_3$ )  $\delta$  163.4 (d,  $J_{\text{C-P}} = 4.1$  Hz), 142.2, 134.9 (d,  $J_{\text{C-P}} = 3.0$  Hz), 133.7 (d,  $J_{\text{C-P}} = 10.7$  Hz), 130.0 (d,  $J_{\text{C-P}} = 13.1$  Hz), 118.1, 117.9, 117.2, 71.7, 33.0 (d,  $J_{\text{C-P}} = 53.7$  Hz), 29.3,

27.0, 23.4, 18.1;  $^{31}\text{P}$  NMR (242 MHz,  $\text{CDCl}_3$ )  $\delta$  20.92; HRMS(EI) Calcd for  $\text{C}_{27}\text{H}_{28}\text{BrO}_2\text{P}$  [ $\text{M}^+$ ]: 494.1010, Found 494.1015; IR (KBr)  $\nu(\text{cm}^{-1})$ : 3422, 2915, 2871, 1715, 1587, 1485, 1438, 1326, 1270, 1113.

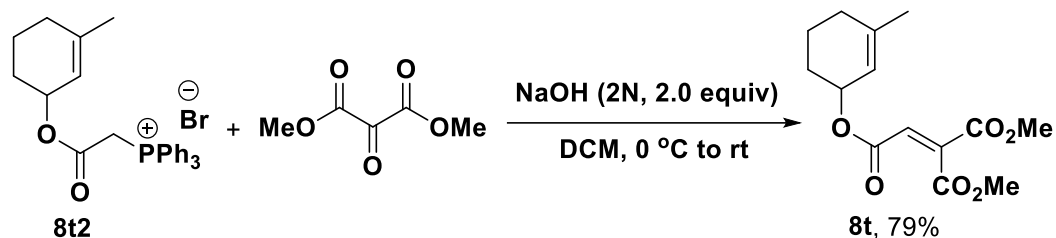

**1,1-Dimethyl 2-(3-methylcyclohex-2-en-1-yl) ethene-1,1,2-tricarboxylate (8t):** **8t2** (1.49 g, 3.0 mmol, 1.0 equiv) and dimethyl keto malonate (439 mg, 3.0 mmol, 1.0 equiv) were mixed in DCM (30 mL), and then cooled to 0 °C. A aqueous solution of NaOH (240 mg, 6.0 mmol, 2.0 equiv, 2N) was added dropwise into the solution. The reaction was stirred at 0 °C for 30 min, and then extracted by DCM (15 mL x 3). The combined organic phase was dried over anhydrous  $\text{Na}_2\text{SO}_4$ . After evaporation of the solvent under reduced pressure, the crude product was purified by column chromatography on silica gel (Petroleum ether/ EtOAc = 50/1) to give the desired esters **8t** (670 mg, 79% yield). Colorless oil;  $^1\text{H}$  NMR (400 MHz,  $\text{CDCl}_3$ )  $\delta$  6.88 (s, 1H), 5.47 (s, 1H), 5.31 (s, 1H), 3.86 (s, 3H), 3.83 (s, 3H), 2.03– 1.89 (m, 2H), 1.78-1.75 (s, 3H), 1.70 (s, 3H), 1.65 – 1.61 (m, 1H);  $^{13}\text{C}$  NMR (100 MHz,  $\text{CDCl}_3$ )  $\delta$  164.8, 163.1, 162.7, 142.2, 137.7, 131.4, 118.9, 70.6, 53.2, 52.8, 29.8, 27.7, 23.7, 18.7; HRMS(EI) Calcd for  $\text{C}_{14}\text{H}_{18}\text{O}_6$  [ $\text{M}^+$ ]: 282.1103, Found 282.1106; IR (KBr)  $\nu(\text{cm}^{-1})$ : 2953, 1742, 1721, 1437, 1266, 1174.

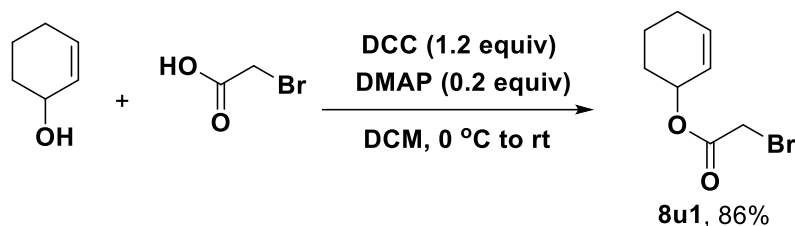

**Cyclohex-2-en-1-yl 2-bromoacetate (8u1):** To the mixture of 2-Cyclohexen-1-ol (491 mg, 5.0 mmol, 1.0 equiv), bromoacetic acid (834 mg, 6.0 mmol, 1.2 equiv) and 4-dimethylaminopyridine (DMAP, 122 mg, 1.0 mmol, 0.2 equiv) in DCM (20 mL) was added dicyclohexylcarbodiimide (DCC, 1.24 g, 6.0 mmol, 1.2 equiv) in portions at 0 °C. After 30 min, the reaction mixture was filtered. The solvent was evaporated under reduced pressure. The crude product was purified by column chromatography on silica

gel (Petroleum ether/ EtOAc = 50/1) to give the desired ester products **8u1** (942 mg, 86% yield). Colorless oil;  $^1\text{H}$  NMR (400 MHz,  $\text{CDCl}_3$ )  $\delta$  5.98 (d,  $J = 10.0$  Hz, 1H), 5.70 (d,  $J = 8.8$  Hz, 1H), 5.29 (s, 1H), 3.81 (s, 2H), 2.11 – 1.96 (m, 2H), 1.90 – 1.82 (m, 1H), 1.79-1.70 (m, 2H), 1.65-1.61 (m, 1H);  $^{13}\text{C}$  NMR (100 MHz,  $\text{CDCl}_3$ )  $\delta$  166.8, 133.5, 124.6, 70.1, 27.9, 26.3, 24.7, 18.5; HRMS(EI) Calcd for  $\text{C}_8\text{H}_{11}\text{BrO}_2$  [ $\text{M}^+$ ]: 217.9942, Found 217.9950; IR (film)  $\nu(\text{cm}^{-1})$ : 3427, 2926, 2857, 1711, 1633, 1458, 1385, 1282, 1029.

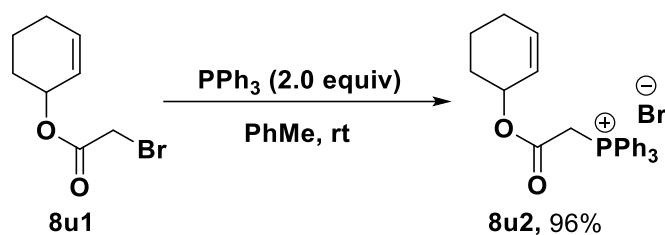

**(2-(Cyclohex-2-en-1-yloxy)-2-oxoethyl)triphenylphosphonium bromide (8u2)**: The obtained ester **8u1** (0.8 g, 3.65 mmol, 1.0 equiv) and  $\text{PPh}_3$  (1.92 g, 7.3 mmol, 2.0 equiv) were stirred in toluene (30 mL) at room temperature for 48 h. A white precipitate was formed from the reaction mixture. After filtered, the white solid was collected and dried at room temperature to give the desired product **8u2** (1.69 g, 96% yield). White solid; mp 137.1-137.3  $^\circ\text{C}$ ;  $^1\text{H}$  NMR (400 MHz,  $\text{CDCl}_3$ )  $\delta$  7.94 – 7.89 (m, 6H), 7.80 – 7.76 (m, 3H), 7.69-7.65 (m, 6H), 5.85 (dt,  $J = 10.2$  and 3.9 Hz, 1H), 5.64 – 5.50 (m, 2H), 5.40 – 5.36 (m, 1H), 5.08 (d,  $J = 4.7$  Hz, 1H), 2.00 – 1.86 (m, 2H), 1.68-1.64 (m, 1H), 1.56-1.53 (m, 1H), 1.50-1.46 (m, 2H);  $^{13}\text{C}$  NMR (100 MHz,  $\text{CDCl}_3$ )  $\delta$  163.8 (d,  $J_{\text{C-P}} = 3.9$  Hz), 135.1 (d,  $J_{\text{C-P}} = 2.9$  Hz), 134.0 (d,  $J_{\text{C-P}} = 10.6$  Hz), 130.2 (d,  $J_{\text{C-P}} = 13.1$  Hz), 123.7, 118.4, 117.5, 71.0, 33.4 (d,  $J_{\text{C-P}} = 54.0$  Hz), 27.6, 24.5, 18.2;  $^{31}\text{P}$  NMR (242 MHz,  $\text{CDCl}_3$ )  $\delta$  20.83; HRMS(EI) Calcd for  $\text{C}_{26}\text{H}_{26}\text{BrO}_2\text{P}$  [ $\text{M}^+$ ]: 480.0854, Found 480.0838; IR (KBr) ( $\text{cm}^{-1}$ ): 3436, 3011, 2873, 2832, 1738, 1439, 1247, 1111, 1002, 915, 869.

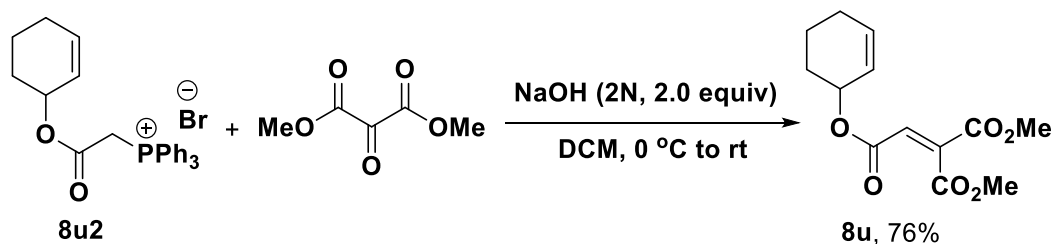

**2-Cyclohex-2-en-1-yl 1,1-dimethyl ethene-1,1,2-tricarboxylate (8u)**: **8u2** (1.49 g, 3.1 mmol, 1.0 equiv) and dimethyl keto malonate (453 mg, 3.1 mmol, 1.0 equiv) were

mixed in DCM (30 mL), and then cooled to 0 °C. A aqueous solution of NaOH (240 mg, 6.0 mmol, 2.0 equiv, 2N) was added dropwise into the solution. The reaction was stirred at 0 °C for 30 min, and then extracted by DCM (15 mL x 3). The combined organic phase was dried over anhydrous Na<sub>2</sub>SO<sub>4</sub>. After evaporation of the solvent under reduced pressure, the crude product was purified by column chromatography on silica gel (Petroleum ether/ EtOAc = 50/1) to give the desired esters **8u** (632 mg, 76% yield). Colorless oil; <sup>1</sup>H NMR (400 MHz, CDCl<sub>3</sub>) δ 6.90 (s, 1H), 6.02 – 5.98 (m, 1H), 5.73 – 5.69 (m, 1H), 5.34 (d, *J* = 3.1Hz, 1H), 3.88 (s, 3H), 3.84 (s, 3H), 2.13 – 1.96 (m, 2H), 1.92-1.84 (m, 1H), 1.81 – 1.71 (m, 2H), 1.68 – 1.63 (m, 1H); <sup>13</sup>C NMR (100 MHz, CDCl<sub>3</sub>) δ 164.7, 163.1, 162.7, 137.9, 133.7, 131.3, 124.6, 69.8, 53.2, 52.9, 28.0, 24.8, 18.5; HRMS(EI) Calcd for C<sub>13</sub>H<sub>16</sub>O<sub>6</sub> [M<sup>+</sup>]: 268.0947, Found 268.0960; IR (KBr) (cm<sup>-1</sup>): 3425, 2953, 1744, 1723, 1438, 1367, 1268, 1173, 1069, 1011, 910.

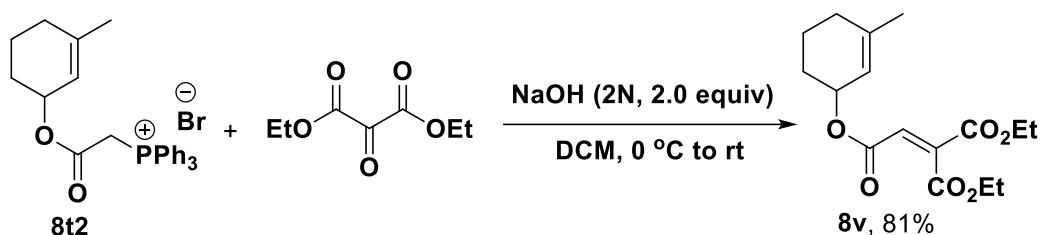

**1,1-Diethyl 2-(3-methylcyclohex-2-en-1-yl) ethene-1,1,2-tricarboxylate (8v):** **8t2** (1.49 g, 3.0 mmol, 1.0 equiv) and diethyl keto malonate (522 mg, 3.0 mmol, 1.0 equiv) were mixed in DCM (30 mL), and then cooled to 0 °C. A aqueous solution of NaOH (240 mg, 6.0 mmol, 2.0 equiv, 2N) was added dropwise into the solution. The reaction was stirred at 0 °C for 30 min, and then extracted by DCM (15 mL x 3). The combined organic phase was dried over anhydrous Na<sub>2</sub>SO<sub>4</sub>. After evaporation of the solvent under reduced pressure, the crude product was purified by column chromatography on silica gel (Petroleum ether/ EtOAc = 30/1) to give the desired esters **8v** (754 mg, 81% yield). Colorless oil; <sup>1</sup>H NMR (400 MHz, CDCl<sub>3</sub>) δ 6.84 (s, 1H), 5.46 (s, 1H), 5.31 (s, 1H), 4.35-4.24 (m, 4H), 2.02 – 1.93 (m, 2H), 1.88-1.74 (m, 3H), 1.69 (s, 3H), 1.33 (t, *J* = 7.1Hz, 3H), 1.29 (t, *J* = 7.1Hz, 3H); <sup>13</sup>C NMR (100 MHz, CDCl<sub>3</sub>) δ 164.3, 163.2, 162.3, 142.1, 138.4, 130.6, 119.0, 70.5, 62.3, 61.9, 29.8, 27.7, 23.7, 18.7, 13.9, 13.8; HRMS(EI) Calcd for C<sub>16</sub>H<sub>22</sub>O<sub>6</sub> [M<sup>+</sup>]: 310.1416, Found 310.1405; IR (film) ν(cm<sup>-1</sup>): 2940, 1721, 1376, 1254, 1183, 1164, 1067, 1023, 913.

#### 4. Preparation of deuterated substrates D-8p and D-8j

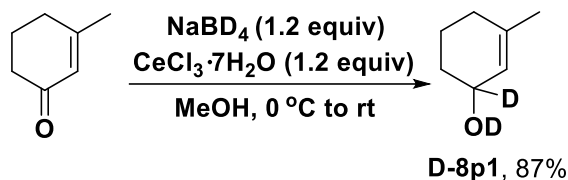

**Deuterated-3-Methylcyclohex-2-enol (D-8p1):** To the solution of 3-Methyl-2-cyclohexen-1-one (330 mg, 3.0 mmol, 1.0 equiv) and Cerium(III) chloride heptahydrate (1.34 g, 3.6 mmol, 1.2 equiv) in MeOH (20 mL) was added NaBD<sub>4</sub> (151 mg, 3.6 mmol, 1.2 equiv) at 0 °C, the reaction was stirred at 0 °C for 30 min. The reaction mixture was extracted by DCM (15 mL x 3), the combined organic phase was dried over anhydrous Na<sub>2</sub>SO<sub>4</sub>. After evaporation of the solvent under reduced pressure (the temperature should be kept below 20 °C), the residue light yellow oil was pure enough used for next step without further purification (994 mg, 87% yield). Colorless oil; <sup>1</sup>H NMR (400 MHz, CDCl<sub>3</sub>) δ 5.47 (s, 1H), 1.96-1.87 (m, 2H), 1.78-1.71 (m, 3H), 1.67 (s, 3H), 1.57-1.55 (m, 1H); <sup>13</sup>C NMR (100 MHz, CDCl<sub>3</sub>) δ 138.7, 124.1, 65.79, 65.54, 65.32, 65.11, 31.4, 30.0, 23.6, 18.9; HRMS(EI) Calcd for C<sub>7</sub>H<sub>10</sub>D<sub>2</sub>O [M<sup>+</sup>]: 114.1014, Found 114.1013; IR (film) (cm<sup>-1</sup>): 3331, 2934, 1447, 1339, 1171, 1095, 1069, 1005, 942.

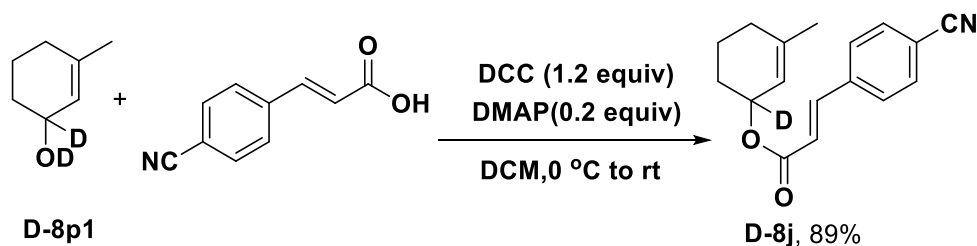

**Deuterated-(E)-3-Methylcyclohex-2-en-1-yl 3-(4-cyanophenyl)acrylate (D-8j):** To the mixture of **D-8p1** (228 mg, 2.0 mmol, 1.0 equiv), (*E*)-3-(4-cyanophenyl)acrylic acid (416 mg, 2.4 mmol, 1.2 equiv) and 4-dimethylaminopyridine (DMAP, 49 mg, 0.4 mmol, 0.2 equiv) in DCM (20 mL) was added dicyclohexylcarbodiimide (DCC, 495 mg, 2.4 mmol, 1.2 equiv) in portions at 0 °C. The reaction was stirred at room temperature for 30 min. The reaction mixture was filtered, after evaporation of the solvent under reduced pressure, the crude product was purified by column chromatography on silica

gel (Petroleum ether/ EtOAc = 30/1) to give **D-8j** (478 mg, 89 % yield). White solid; mp 82.4-82.6 °C; <sup>1</sup>H NMR (400 MHz, CDCl<sub>3</sub>) δ 7.68–7.66 (m, 3H), 7.63-7.59 (m, 2H), 6.52 (d, *J* = 16.0 Hz, 1H), 5.54 (s, 1H), 2.06 – 1.93 (m, 2H), 1.84-1.78 (m, 3H), 1.74 (s, 3H), 1.70-1.65 (m, 1H); <sup>13</sup>C NMR (100 MHz, CDCl<sub>3</sub>) δ 165.8, 141.8, 141.6, 138.8, 132.5, 128.3, 122.4, 119.5, 118.3, 113.2, 69.4, 69.2, 69.0, 68.7, 29.9, 27.8, 23.7, 18.9; HRMS(EI) Calcd for C<sub>17</sub>H<sub>16</sub>DNO<sub>2</sub> [M<sup>+</sup>]: 268.1322, Found 268.1313; IR (KBr) ν(cm<sup>-1</sup>): 2938, 2227, 1708, 1638, 1329, 1319, 1207, 1165, 1085, 901, 829.

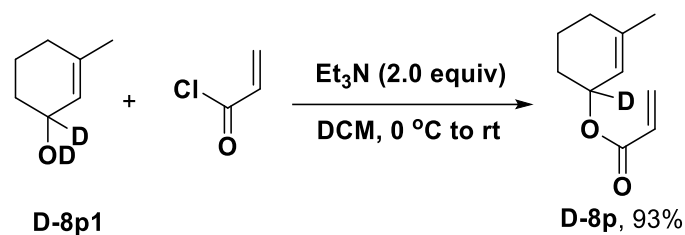

**Deuterated-3-Methylcyclohex-2-en-1-yl acrylate (D-8p):** To the mixture of **D-8p1** (228 mg, 2.0 mmol, 1.0 equiv) and Et<sub>3</sub>N (405 mg, 4.0 mmol, 2.0 equiv) in DCM (20 mL) was added acryloyl chloride (217 mg, 2.4 mmol, 1.2 equiv) at 0 °C. The reaction mixture was stirred at room temperature for 30 min. Then the reaction was quenched by water, extracted by DCM (15 mL x 3), the combined organic phase was dried over anhydrous Na<sub>2</sub>SO<sub>4</sub>. After evaporation of the solvent under reduced pressure, the crude product was purified by column chromatography on silica gel (Petroleum ether/ EtOAc = 50/1) to give **D-8p** (311 mg, 93% yield). Colorless oil; <sup>1</sup>H NMR (400 MHz, CDCl<sub>3</sub>) δ 6.38 (dd, *J* = 17.3 and 1.1 Hz, 1H), 6.11 (dd, *J* = 17.3, 10.4 Hz, 1H), 5.78 (dd, *J* = 10.4 and 1.2 Hz, 1H), 5.49 (s, 1H), 2.03 – 1.89 (m, 2H), 1.80 – 1.72 (m, 3H), 1.71 (s, 3H), 1.66-1.59 (m, 1H); <sup>13</sup>C NMR (100 MHz, CDCl<sub>3</sub>) δ 166.0, 141.3, 130.2, 129.1, 119.8, 68.92, 68.77, 68.54, 68.31, 29.9, 27.9, 23.7, 19.0; HRMS(EI) Calcd for C<sub>10</sub>H<sub>13</sub>DO<sub>2</sub> [M<sup>+</sup>]: 167.1057, Found 167.1051; IR (film) ν(cm<sup>-1</sup>): 2935, 1720, 1405, 1296, 1209, 1167, 1042, 927.

## 5. Preparation of structurally similar substrates (10-17)

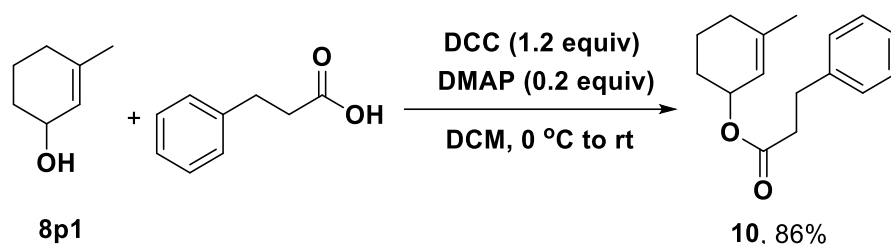

**3-Methylcyclohex-2-en-1-yl 3-phenylpropanoate (10):** To the mixture of **8p1** (224 mg, 2.0 mmol, 1.0 equiv), 3-phenylpropanoic acid (360 mg, 2.4 mmol, 1.2 equiv) and 4-dimethylaminopyridine (DMAP, 49 mg, 0.4 mmol, 0.2 equiv) in DCM (20 mL) was added dicyclohexylcarbodiimide (DCC, 495 mg, 2.4 mmol, 1.2 equiv) in portions at 0 °C. The reaction was stirred at room temperature for 30 min. The reaction mixture was filtered, after evaporation of the solvent under reduced pressure, the crude product was purified by column chromatography on silica gel (Petroleum ether/ EtOAc = 50/1) to give **10** (420 mg, 86% yield). Colorless oil; <sup>1</sup>H NMR (400 MHz, CDCl<sub>3</sub>) δ 7.38 – 7.35 (m, 2H), 7.30-7.28 (m, 3H), 5.52 (s, 1H), 5.34 (s, 1H), 3.04 (t, *J* = 7.9 Hz, 2H), 2.70 (t, *J* = 7.5 Hz, 2H), 2.09-1.96 (m, 2H), 1.87-1.81 (m, 2H), 1.79 (s, 3H), 1.75 – 1.67(m, 2H); <sup>13</sup>C NMR (100 MHz, CDCl<sub>3</sub>) δ 172.6, 141.0, 140.5, 128.4, 128.3, 126.1, 119.9, 68.8, 36.2, 31.1, 29.8, 27.9, 23.7, 19.0; HRMS(EI) Calcd for C<sub>16</sub>H<sub>20</sub>O<sub>2</sub> [M<sup>+</sup>]: 244.1463, Found 244.1460; IR (KBr) ν (cm<sup>-1</sup>): 2936, 2867, 1729, 1497, 1452, 1377, 1288, 1180, 1160, 1074, 976, 914.

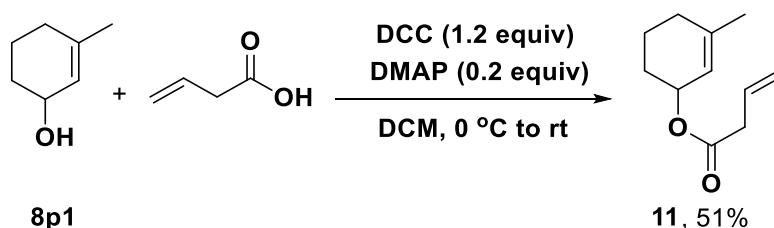

**Cyclohex-2-en-1-yl but-3-enoate (11):** To the mixture of **8p1** (224 mg, 2.0 mmol, 1.0 equiv), but-3-enoic acid (207 mg, 2.4 mmol, 1.2 equiv) and 4-dimethylaminopyridine (DMAP, 49 mg, 0.4 mmol, 0.2 equiv) in DCM (20 mL) was added dicyclohexylcarbodiimide (DCC, 495 mg, 2.4 mmol, 1.2 equiv) in portions at 0 °C. The reaction was stirred at room temperature for 30 min. The reaction mixture was filtered, after evaporation of the solvent under reduced pressure, the crude product was purified by column chromatography on silica gel (Petroleum ether/ EtOAc = 50/1) to give



**11** (185 mg, 51% yield). Colorless oil;  $^1\text{H NMR}$  (400 MHz,  $\text{CDCl}_3$ )  $\delta$  5.99-5.84 (m, 1H), 5.44 (s, 1H), 5.24 (s, 1H), 5.15 (d,  $J = 4.0$  Hz, 1H), 5.11 (s, 1H), 3.05 (d,  $J = 4.0$  Hz, 2H), 1.99-1.83 (m, 2H), 1.77-1.70 (m, 3H), 1.68 (s, 3H), 1.66 – 1.53 (m, 1H);  $^{13}\text{C NMR}$  (100 MHz,  $\text{CDCl}_3$ )  $\delta$  171.2, 141.1, 130.5, 119.8, 118.2, 69.0, 39.4, 29.8, 27.9, 23.7, 18.9; HRMS(EI) Calcd for  $\text{C}_{11}\text{H}_{16}\text{O}_2$  [ $\text{M}^+$ ]: 180.1150, Found 180.1148; IR (film)  $\nu(\text{cm}^{-1})$ : 2938, 1732, 1440, 1253, 1180, 988, 916.

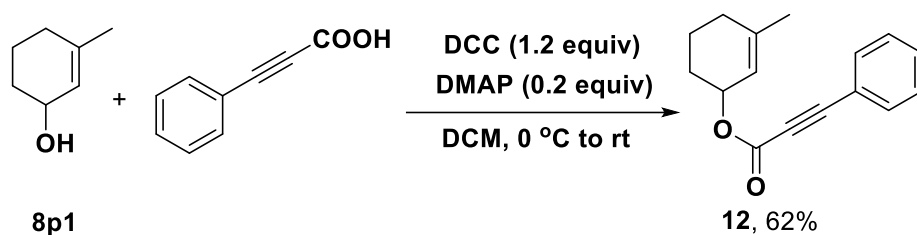

**3-Methylcyclohex-2-en-1-yl 3-phenylpropiolate (12):** To the mixture of **8p1** (224 mg, 2.0 mmol, 1.0 equiv), 3-phenylpropionic acid (351 mg, 2.4 mmol, 1.2 equiv) and 4-dimethylaminopyridine (DMAP, 49 mg, 0.4 mmol, 0.2 equiv) in DCM (20 mL) was added dicyclohexylcarbodiimide (DCC, 495 mg, 2.4 mmol, 1.2 equiv) in portions at 0 °C. The reaction was stirred at room temperature for 30 min. The reaction mixture was filtered, after evaporation of the solvent under reduced pressure, the crude product was purified by column chromatography on silica gel (Petroleum ether/ EtOAc = 50/1) to give **12** (298 mg, 62% yield). Colorless oil;  $^1\text{H NMR}$  (400 MHz,  $\text{CDCl}_3$ )  $\delta$  7.58 – 7.56 (m, 2H), 7.45-7.41 (m, 1H), 7.37-7.33 (m, 2H), 5.54 (s, 1H), 5.39 (s, 1H), 2.04-1.91 (m, 2H), 1.85-1.79 (m, 3H), 1.73 (s, 3H), 1.69-1.63 (m, 1H);  $^{13}\text{C NMR}$  (100 MHz,  $\text{CDCl}_3$ )  $\delta$  153.9, 142.2, 132.9, 130.4, 128.5, 119.8, 119.1, 85.7, 81.0, 70.9, 29.8, 27.8, 23.7, 18.8; HRMS(EI) Calcd for  $\text{C}_{16}\text{H}_{16}\text{O}_2$  [ $\text{M}^+$ ]: 240.1150, Found 240.1153; IR (KBr)  $\nu(\text{cm}^{-1})$ : 2936, 2216, 1704, 1491, 1444, 1282, 1192, 1069, 972, 907, 757, 690.

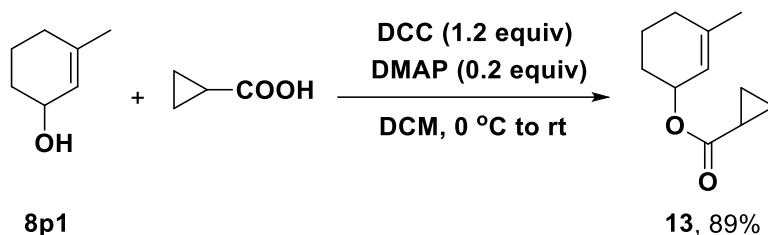

**3-Methylcyclohex-2-en-1-yl cyclopropanecarboxylate (13):** To the mixture of **8p1** (224 mg, 2.0 mmol, 1.0 equiv), cyclopropanecarboxylic acid (207 mg, 2.4 mmol, 1.2

equiv) and 4-dimethylaminopyridine (DMAP, 49 mg, 0.4 mmol, 0.2 equiv) in DCM (20 mL) was added dicyclohexylcarbodiimide (DCC, 495 mg, 2.4 mmol, 1.2 equiv) in portions at 0 °C. The reaction was stirred at room temperature for 30 min. The reaction mixture was filtered, after evaporation of the solvent under reduced pressure, the crude product was purified by column chromatography on silica gel (Petroleum ether/ EtOAc = 50/1) to give **13** (321mg, 89% yield). Colorless oil; <sup>1</sup>H NMR (600 MHz, CDCl<sub>3</sub>) δ 5.43 (s, 1H), 5.21 (s, 1H), 1.98-1.88 (m, 2H), 1.75-1.70 (m, 2H), 1.68 (s, 3H), 1.66-1.63 (m, 1H), 1.62-1.58 (m, 1H), 1.57 – 1.53 (m, 1H), 0.96-0.93 (m, 2H), 0.81-0.78 (m, 2H); <sup>13</sup>C NMR (150 MHz, CDCl<sub>3</sub>) δ 174.5, 140.8, 120.0, 68.5, 29.8, 27.9, 23.7, 18.9, 13.1, 8.3, 8.2; HRMS(EI) Calcd for C<sub>11</sub>H<sub>16</sub>O<sub>2</sub> [M<sup>+</sup>]: 180.1150, Found 180.1151; IR (KBr) ν (cm<sup>-1</sup>): 3339, 2943, 2832, 1454, 1115, 1032.

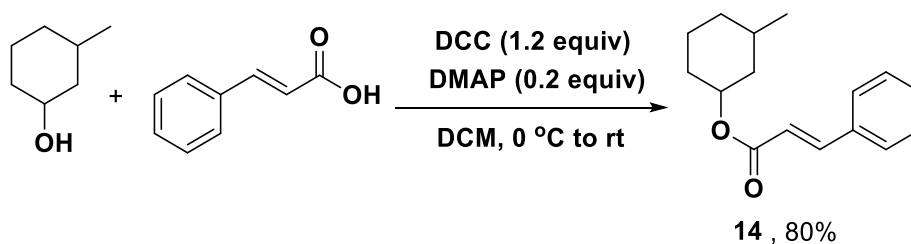

**3-Methylcyclohexyl cinnamate (14):** To the mixture of 3-methylcyclohexan-1-ol (228 mg, 2.0 mmol, 1.0 equiv), cinnamic acid (356 mg, 2.4 mmol, 1.2 equiv) and 4-dimethylaminopyridine (DMAP, 49 mg, 0.4 mmol, 0.2 equiv) in DCM (20 mL) was added dicyclohexylcarbodiimide (DCC, 495 mg, 2.4 mmol, 1.2 equiv) in portions at 0 °C. The reaction was stirred at room temperature for 30 min. The reaction mixture was filtered, after evaporation of the solvent under reduced pressure, the crude product was purified by column chromatography on silica gel (Petroleum ether/ EtOAc = 50/1) to give **14** (391 mg, 80% yield). Colorless oil; <sup>1</sup>H NMR (600 MHz, CDCl<sub>3</sub>) δ 7.69-7.65 (m, 1.70 H), 7.54-7.51 (m, 3.47 H), 7.39-7.36 (m, 5.00 H), 6.47-6.41 (m, 1.61 H), 5.21-5.20 (m, 0.57 H), 4.86-4.81 (m, 1.00 H), 2.05-2.03 (d, *J* = 12.2 Hz, 2.14 H), 1.91 – 1.78 (m, 3.26 H), 1.73-1.46 (m, 4.92 H), 1.41-1.20 (m, 3.03 H), 1.06 (q, *J* = 11.6 Hz, 1.27 H), 1.03-0.96 (m, 1.01 H), 0.95 (d, *J* = 6.5 Hz, 3.15 H), 0.91 (d, *J* = 6.7 Hz, 1.82 H), 0.85 (qd, *J* = 12.7 and 3.6 Hz, 1.29 H); <sup>13</sup>C NMR (150 MHz, CDCl<sub>3</sub>) δ 166.37, 166.36, 144.2, 144.1, 134.44, 134.42, 130.0, 128.8, 128.0, 118.9, 118.7, 73.3, 70.3, 40.5, 38.4,

34.1, 33.9, 31.5, 31.3, 29.9, 27.1, 23.9, 22.2, 22.1, 20.7; HRMS(EI) Calcd for C<sub>16</sub>H<sub>20</sub>O<sub>2</sub> [M<sup>+</sup>]: 244.1463, Found 244.1457; IR (KBr) (cm<sup>-1</sup>) : 2932, 2864, 1710, 1639, 1451, 1309, 1276, 1201, 1176, 1002, 979, 767.

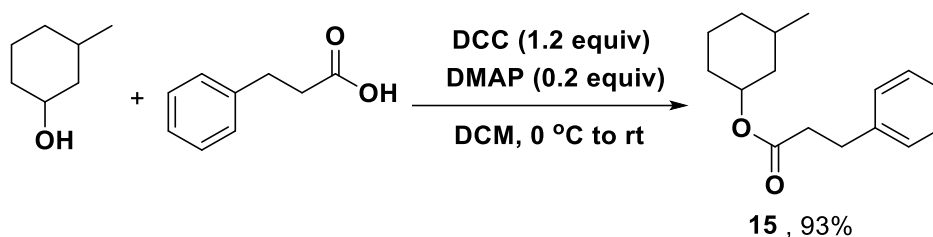

**3-Methylcyclohexyl 3-phenylpropanoate (15):** To the mixture of 3-methylcyclohexan-1-ol (228 mg, 2.0 mmol, 1.0 equiv), 3-phenylpropanoic acid (360 mg, 2.4 mmol, 1.2 equiv) and 4-dimethylaminopyridine (DMAP, 49 mg, 0.4 mmol, 0.2 equiv) in DCM (20 mL) was added dicyclohexylcarbodiimide (DCC, 495 mg, 2.4 mmol, 1.2 equiv) in portions at 0 °C. The reaction was stirred at room temperature for 30 min. The reaction mixture was filtered, after evaporation of the solvent under reduced pressure, the crude product was purified by column chromatography on silica gel (Petroleum ether/ EtOAc = 50/1) to give **15** (458 mg, 93% yield). Colorless oil; <sup>1</sup>H NMR (400 MHz, CDCl<sub>3</sub>) δ 7.38 – 7.35 (m, 3.22 H), 7.30-7.28 (m, 4.03 H), 5.16 – 5.14 (m, 0.6 H), 4.82 – 4.74 (m, 1.01 H), 3.07-3.01 (m, 4.01 H), 2.74-2.66 (m, 4.06 H), 2.01-1.98 (d, *J* = 11.9 Hz, 2.55 H), 1.86 – 1.69 (m, 6.04 H), 1.62-1.53 (m, 2.78 H), 1.52-1.45 (m, 0.68 H), 1.44-1.35 (m, 1.65 H), 1.31-1.18 (m, 2.27 H), 1.07-1.04 (m, 1.34 H), 1.00 (d, *J* = 6.6 Hz, 3.84 H), 0.94 (d, *J* = 6.4 Hz, 1.77 H), 0.91-0.84 (m, 1.57 H); <sup>13</sup>C NMR (100 MHz, CDCl<sub>3</sub>) δ 172.34, 172.32, 140.6, 140.5, 128.4, 128.3, 128.2, 126.1, 73.2, 70.3, 40.4, 38.3, 36.2, 34.1, 33.9, 31.4, 31.3, 31.1, 31.0, 29.8, 27.0, 23.9, 22.2, 22.1, 20.6; HRMS(EI) Calcd for C<sub>16</sub>H<sub>22</sub>O<sub>2</sub> [M<sup>+</sup>]: 246.1620, Found 246.1614; IR (KBr) ν(cm<sup>-1</sup>) : 2932, 2864, 1732, 1496, 1453, 1360, 1259, 1238, 1178, 1093, 1042, 989, 920.

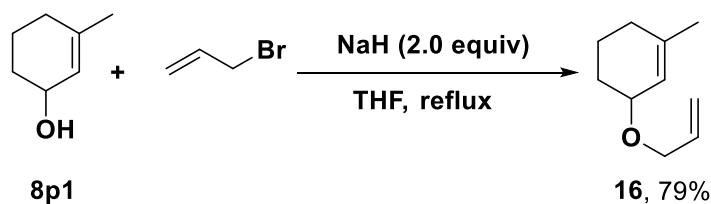

**3-(Allyloxy)-1-methylcyclohex-1-ene (16):** NaH ( 160 mg, 60%, 4.0 mmol, 2.0 equiv) was added into the solution of **8p1** (224.3 mg, 2.0 mmol, 1.0 equiv) in THF (20 mL),

the mixture was reflux for 30 min. 3-Bromoprop-1-ene ( 484 mg, 4.0 mmol, 2.0 equiv) was added into the reaction mixture and reflux for additional 2 hours. Then the reaction mixture was quenched by saturated  $\text{NH}_4\text{Cl}$  (aq), and extracted by DCM (15 mL $\times$ 3). The combined organic phase was dried with anhydrous  $\text{Na}_2\text{SO}_4$ . After evaporation of the solvent under reduced pressure, the crude product was purified by column chromatography on silica gel (Petroleum ether/ EtOAc = 50/1) to give **16** (240 mg, 79% yield). Colorless oil;  $^1\text{H}$  NMR (400 MHz,  $\text{CDCl}_3$ )  $\delta$  5.97-5.87 (m, 1H), 5.50 (d,  $J$  = 1.1Hz, 1H), 5.25 (dd,  $J$  = 17.2 and 1.4 Hz, 1H), 5.12 (dd,  $J$  = 10.3 and 0.7 Hz, 1H), 4.06-3.95 (m, 2 H), 3.85 (s, 1H), 1.97-1.85 (m, 2H), 1.78 – 1.71 (m, 2H), 1.67 (s, 3H), 1.64 – 1.59 (m, 1H), 1.56-1.50 (m, 1H);  $^{13}\text{C}$  NMR (100 MHz,  $\text{CDCl}_3$ )  $\delta$  138.8, 135.5, 122.1, 116.2, 72.6, 69.0, 30.1, 27.9, 23.6, 19.2; HRMS(EI) Calcd for  $\text{C}_{10}\text{H}_{17}\text{O}$   $[\text{M} + \text{H}]^+$ : 153.1279, Found 153.1274 ; IR (KBr)  $\nu$  ( $\text{cm}^{-1}$ ) : 3468, 2936, 1639, 1449, 1082, 1016, 916.

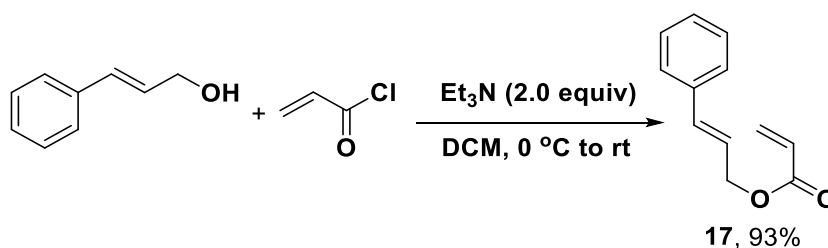

**Cinnamyl acrylate<sup>2</sup> (17):** To the mixture of Cinnamyl alcohol (268 mg, 2.0 mmol, 1.0 equiv) and  $\text{Et}_3\text{N}$  (405 mg, 4.0 mmol, 2.0 equiv) in DCM (30 mL) was added acryloyl chloride (217 mg, 2.4 mmol, 1.2 equiv) at 0 °C. The reaction mixture was stirred at room temperature for 30 min. Then the reaction was quenched by water, extracted by DCM (15 mL x 3). The combined organic phase was dried over anhydrous  $\text{Na}_2\text{SO}_4$ . After evaporation of the solvent under reduced pressure, the crude product was purified by column chromatography on silica gel (Petroleum ether/ EtOAc = 50/1) to give **17** (350 mg, 93% yield). Colorless oil;  $^1\text{H}$  NMR (400 MHz,  $\text{CDCl}_3$ )  $\delta$  7.43-7.41 (d,  $J$  = 7.3 Hz, 2H), 7.34 (t,  $J$  = 7.4 Hz, 2H), 7.29 (d,  $J$  = 7.2 Hz, 1H), 6.70 (d,  $J$  = 15.9 Hz, 1H), 6.48 (dd,  $J$  = 17.3 and 1.2 Hz, 1H), 6.34 (dt,  $J$  = 15.9 and 6.4 Hz, 1H), 6.19 (dd,  $J$  = 17.3 and 10.4 Hz, 1H), 5.86 (dd,  $J$  = 10.4 and 1.2 Hz, 1H), 4.84 (dd,  $J$  = 6.4 and 1.0 Hz, 2H);  $^{13}\text{C}$  NMR (100 MHz,  $\text{CDCl}_3$ )  $\delta$  165.8, 136.1, 134.2, 130.9, 128.5, 128.3, 128.0, 126.5, 123.0, 65.0.

## Reference:

1. a) Klaus Daniel Umland, Adeline Palisse, Timm T. Haug, Stefan F. Kirsch. *Angewandte Chemie, International Edition*. **2011**, *50*, 9965-9968; b) Monica Nardi, Giovanni Sindona, Paola Costanzo, Manuela Oliverio, Antonio Procopio. *Tetrahedron*. **2015**, *71*, 1132-1135; c) Gary B. Fisher, Joseph C. Fuller, John Harrison, Salvador G. Alvarez, Elizabeth R. Burkhardt, Christian T. Goralski, and Bakthan Singaram. *Journal of Organic Chemistry*. **1994**, *59*, 6378-6385.
2. a) Maria Kalyva, Alexandros L. Zografos, Era Kapourani, Evaggelos Giambazolias, Laurent Devel, Athanasios Papakyriakou, Vincent Dive, Yannis G. Lazarou, and Dimitris Georgiadis. *Chemistry - A European Journal*, **2015**, *21*, 3278-3289; b) Daiki Nakatake, Ryo Yazaki, and Takashi Ohshima. *Eur. J. Org. Chem.* **2016**, 3696–3699.

## Typical Procedure for Photo-Promoted Hydrogen Abstraction and Cyclization of Allyl Acrylic Esters

To a quartz Schlenk tube (15 mL) was added allyl acrylic esters **8** (0.1 mmol) and CH<sub>3</sub>OH (10 mL). The Schlenk tube was refilled with N<sub>2</sub>, and then the reaction mixture was exposed to ultraviolet light (254 nm). The reaction was monitored by TLC. When the starting material was completely consumed, the solvent was removed under reduced pressure, and the residue was purified by column chromatography on silica gel (petroleum ether/ethyl acetate = 20/1) to give product (±)-**9**.

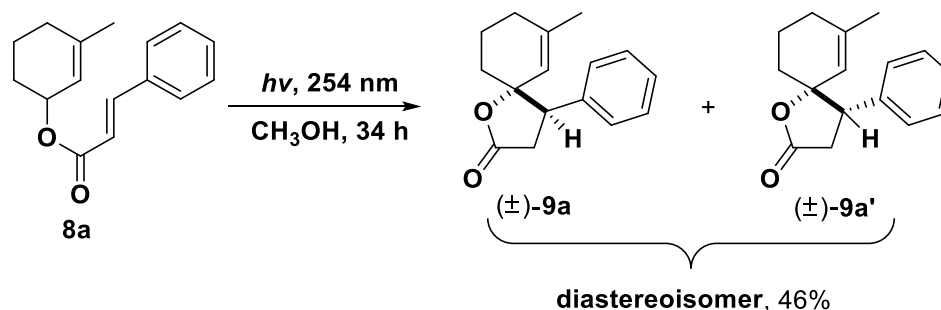

**7-Methyl-4-phenyl-1-oxaspiro[4.5]dec-6-en-2-one (±)-9a and (±)-9a'**: To a quartz Schlenk tube (15 mL) was added **8a** (24.2 mg, 0.1 mmol) and CH<sub>3</sub>OH (10 mL), the Schlenk tube was refilled with N<sub>2</sub>, and then the reaction mixture was exposed to

ultraviolet light (254 nm). The reaction was monitored by TLC. When the starting material was completely consumed, the solvent was removed under reduced pressure, and the residue was purified by column chromatography on silica gel (petroleum ether/ethyl acetate = 20/1) to give product ( $\pm$ )-**9a** and ( $\pm$ )-**9a'** (11.1 mg, 46% yield). Colorless oil;  $^1\text{H NMR}$  (600 MHz,  $\text{CDCl}_3$ )  $\delta$  7.34-7.31 (m, 3.88 H), 7.30-7.27 (m, 2.01 H), 7.18-7.17 (m, 4.17 H), 5.54 (s, 1.00 H), 5.14 (s, 0.67 H), 3.58 (t,  $J = 8.6$  Hz, 1.05 H), 3.48 (t,  $J = 8.6$  Hz, 0.73 H), 3.02 – 2.91 (m, 3.80 H), 2.05 – 2.02 (m, 0.79 H), 1.95 – 1.88 (m, 2.36 H), 1.88-1.84 (m, 1.08 H), 1.83-1.79 (m, 1.04 H), 1.77 (s, 3.78 H), 1.75-1.74 (m, 0.54 H), 1.72-1.64 (m, 2.22 H), 1.62-1.58 (m, 1.31 H), 1.54 (s, 2.39 H), 1.40-1.35 (m, 1.30 H), 1.33-1.28 (m, 0.83 H), 1.24-1.19 (m, 1.34 H);  $^{13}\text{C NMR}$  (150 MHz,  $\text{CDCl}_3$ )  $\delta$  175.9, 175.7, 143.8, 142.2, 137.3, 136.8, 128.6, 128.5, 128.2, 127.8, 127.53, 127.47, 122.8, 119.3, 87.4, 87.2, 50.954, 50.950, 35.4, 34.4, 34.2, 29.8, 29.6, 29.5, 23.8, 23.7, 19.6, 18.7; HRMS(EI) Calcd for  $\text{C}_{16}\text{H}_{18}\text{O}_2$  [ $\text{M}^+$ ]: 242.1307, Found 242.1311; IR (KBr)  $\nu(\text{cm}^{-1})$  : 3429, 2936, 1768, 1453, 1270, 1240, 1230, 1155, 1078, 937.

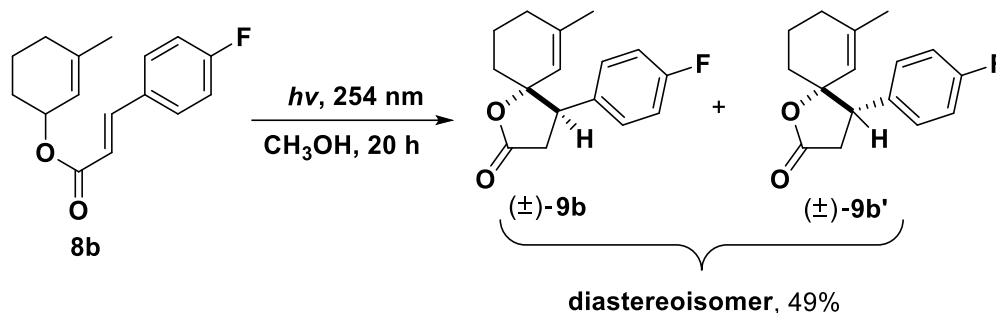

**4-(4-Fluorophenyl)-7-methyl-1-oxaspiro[4.5]dec-6-en-2-one ( $\pm$ )-**9b** and ( $\pm$ )-**9b'**** : To a quartz Schlenk tube (15 mL) was added **8b** (26.0 mg, 0.1 mmol) and  $\text{CH}_3\text{OH}$  (10 mL), the Schlenk tube was refilled with  $\text{N}_2$ , and then the reaction mixture was exposed to ultraviolet light (254 nm). The reaction was monitored by TLC. When the starting material was completely consumed, the solvent was removed under reduced pressure, and the residue was purified by column chromatography on silica gel (petroleum ether/ethyl acetate = 20/1) to give product ( $\pm$ )-**9b** and ( $\pm$ )-**9b'** (12.7 mg, 49% yield).

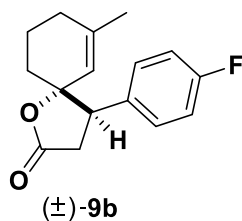

(±)-**9b**: White solid; mp 64.9-65.1 °C;  $^1\text{H}$  NMR (600 MHz,  $\text{CDCl}_3$ )  $\delta$  7.14 (dd,  $J = 8.4$  and 5.4 Hz, 2H), 7.02 (t,  $J = 8.5$  Hz, 2H), 5.10 (s, 1H), 3.47 (t,  $J = 8.5$  Hz, 1H), 3.00-2.90 (m, 2H), 2.04 – 2.01 (m, 1H), 1.94 – 1.91 (m, 1H), 1.86-1.77 (m, 2H), 1.71 – 1.66 (m, 1H), 1.65-1.61 (s, 1H), 1.56 (s, 3H);  $^{13}\text{C}$  NMR (150 MHz,  $\text{CDCl}_3$ )  $\delta$  175.6, 162.0 (d,  $J_{\text{C-F}} = 244.9$  Hz), 142.6, 133.1 (d,  $J_{\text{C-F}} = 3.2$  Hz), 129.6 (d,  $J_{\text{C-F}} = 8.0$  Hz), 119.2, 115.4 (d,  $J_{\text{C-F}} = 21.2$  Hz), 87.3, 50.3, 35.5, 34.4, 29.5, 23.8, 19.6;  $^{19}\text{F}$  NMR (565 MHz,  $\text{CDCl}_3$ )  $\delta$  -114.81; HRMS(EI) Calcd for  $\text{C}_{16}\text{H}_{18}\text{FO}_2$   $[\text{M} + \text{H}]^+$ : 261.1291, Found 261.1285; IR (KBr)  $\nu(\text{cm}^{-1})$ : 2933, 1770, 1606, 1512, 1429, 1379, 1228, 1163, 1082, 937.

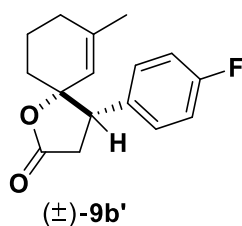

(±)-**9b'**: White solid; mp 85.2-85.4 °C;  $^1\text{H}$  NMR (400 MHz,  $\text{CDCl}_3$ )  $\delta$  7.14 (dd,  $J = 8.4$  and 5.4 Hz, 2H), 7.02 (t,  $J = 8.6$  Hz, 2H), 5.51 (s, 1H), 3.56 (t,  $J = 9.1$  Hz, 1H), 2.93 (d,  $J = 9.1$  Hz, 2H), 1.96-1.92 (m, 1H), 1.77 (s, 3H), 1.70-1.65 (m, 1H), 1.62-1.58 (m, 1H), 1.42 – 1.37 (m, 1H), 1.33-1.28 (m, 1H), 1.23 – 1.16 (m, 1H);  $^{13}\text{C}$  NMR (150 MHz,  $\text{CDCl}_3$ )  $\delta$  175.3, 162.1 (d,  $J_{\text{C-F}} = 245.1$  Hz), 144.1, 132.6 (d,  $J_{\text{C-F}} = 3.2$  Hz), 129.3 (d,  $J_{\text{C-F}} = 8.0$  Hz), 122.6, 115.5 (d,  $J_{\text{C-F}} = 21.2$  Hz), 87.0, 50.3, 34.3, 29.72, 29.66, 23.8, 18.7;  $^{19}\text{F}$  NMR (565 MHz,  $\text{CDCl}_3$ )  $\delta$  -114.63; HRMS(EI) Calcd for  $\text{C}_{16}\text{H}_{18}\text{FO}_2$   $[\text{M} + \text{H}]^+$ : 261.1291, Found 261.1285; IR (KBr)  $\nu(\text{cm}^{-1})$ : 2920, 1770, 1606, 1514, 1427, 1228, 1076, 931.

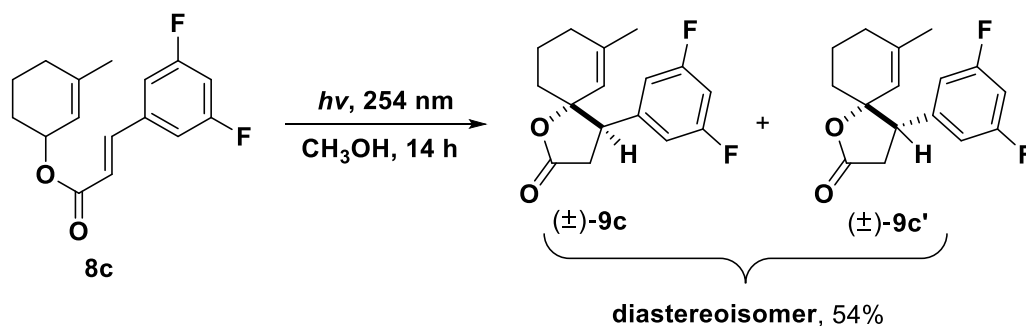

**4-(3,5-Difluorophenyl)-7-methyl-1-oxaspiro[4.5]dec-6-en-2-one (±)-9c and (±)-9c':**

To a quartz Schlenk tube (15 mL) was added **8c** (27.8 mg, 0.1 mmol) and CH<sub>3</sub>OH (10 mL), the Schlenk tube was refilled with N<sub>2</sub>, and then the reaction mixture was exposed to ultraviolet light (254 nm). The reaction was monitored by TLC. When the starting material was completely consumed, the solvent was removed under reduced pressure, and the residue was purified by column chromatography on silica gel (petroleum ether/ethyl acetate = 20/1) to give product **(±)-9c and (±)-9c'** (15.0 mg, 54% yield).

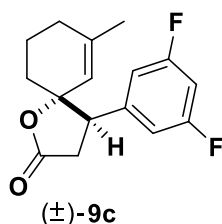

**(±)-9c:** White solid; mp 113.2-113.5 °C; <sup>1</sup>H NMR (600 MHz, CDCl<sub>3</sub>) δ 6.77 – 6.68 (m, 3H), 5.09 (s, 1H), 3.46 (t, *J* = 8.4 Hz, 1H), 3.00 (dd, *J* = 17.7 and 8.4 Hz, 1H), 2.89 (dd, *J* = 17.6 and 8.3 Hz, 1H), 2.04 – 2.01 (m, 1H), 1.97 – 1.94 (m, 1H), 1.91 – 1.83 (m, 3H), 1.72-1.67 (m, 1H), 1.60 (s, 3H); <sup>13</sup>C NMR (150 MHz, CDCl<sub>3</sub>) δ 174.9, 162.9 (dd, *J*<sub>C-F</sub> = 247.6 and 12.7 Hz), 143.2, 141.5 (t, *J*<sub>C-F</sub> = 4.0 Hz), 118.8, 111.2 (dd, *J*<sub>C-F</sub> = 20.1 and 5.2 Hz), 103.1 (t, *J*<sub>C-F</sub> = 25.0 Hz), 87.0, 50.6, 35.2, 34.5, 29.5, 23.8, 19.6; <sup>19</sup>F NMR (565 MHz, CDCl<sub>3</sub>) δ -109.06; HRMS(EI) Calcd for C<sub>16</sub>H<sub>17</sub>F<sub>2</sub>O<sub>2</sub> [M + H]<sup>+</sup>: 279.1197, Found 279.1191; IR (KBr) (cm<sup>-1</sup>): 2922, 1755, 1599, 1456, 1363, 1246, 1163, 1117, 931.

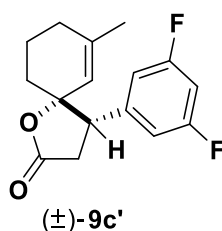



(±)-**9c'**: White solid; mp 128.0-128.2 °C; <sup>1</sup>H NMR (600 MHz, CDCl<sub>3</sub>) δ 6.78-6.69 (m, 3H), 5.50 (s, 1H), 3.56 (t, *J* = 9.1 Hz, 1H), 2.96-2.88 (m, 2H), 1.99-1.95 (m, 1H), 1.85-1.82 (m, 1H), 1.79 (s, 3H), 1.74 – 1.67 (m, 1H), 1.64 – 1.62 (m, 1H), 1.48 – 1.43 (m, 1H), 1.20 (td, *J* = 3.2 and 0.8 Hz, 1H); <sup>13</sup>C NMR (150 MHz, CDCl<sub>3</sub>) δ 174.6, 163.0 (dd, *J*<sub>C-F</sub> = 247.8 and 12.9 Hz), 144.8, 140.8 (t, *J*<sub>C-F</sub> = 8.9 Hz), 122.3, 110.8 (dd, *J*<sub>C-F</sub> = 20.0 and 5.3 Hz), 103.2 (t, *J*<sub>C-F</sub> = 25.1 Hz), 86.6, 50.7, 33.9, 29.7, 23.9, 18.6; <sup>19</sup>F NMR (565 MHz, CDCl<sub>3</sub>) δ -108.80; HRMS(EI) Calcd for C<sub>16</sub>H<sub>16</sub>F<sub>2</sub>O<sub>2</sub> [M<sup>+</sup>] : 278.1118, Found 278.1117; IR (KBr) ν(cm<sup>-1</sup>) : 3427, 2926, 1768, 1626, 1599, 1458, 1242, 1116, 954, 926.

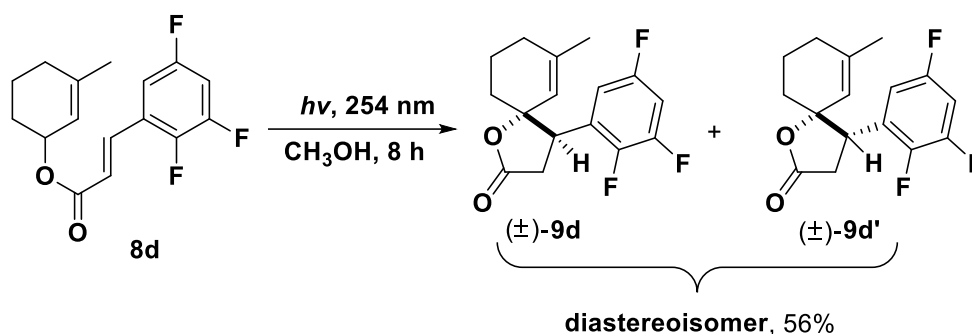

**7-Methyl-4-(2,3,5-trifluorophenyl)-1-oxaspiro[4.5]dec-6-en-2-one (±)-**9d** and (±)-**9d'****: To a quartz Schlenk tube (15 mL) was added **8d** (29.6 mg, 0.1 mmol) and CH<sub>3</sub>OH (10 mL), the Schlenk tube was refilled with N<sub>2</sub>, and then the reaction mixture was exposed to ultraviolet light (254 nm). The reaction was monitored by TLC. When the starting material was completely consumed, the solvent was removed under reduced pressure, and the residue was purified by column chromatography on silica gel (petroleum ether/ethyl acetate = 20/1) to give product (±)-**9d** and (±)-**9d'** (17.2 mg, 56% yield).

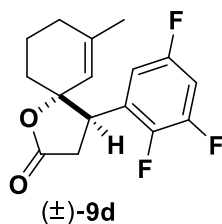

(±)-**9d** : White solid; mp 106.1-106.4 °C; <sup>1</sup>H NMR (600 MHz, CDCl<sub>3</sub>) δ 6.90 – 6.85 (m, 1H), 6.72-6.69 (m, 1H), 5.01 (s, 1H), 3.86 (dd, *J* = 8.8 and 6.2 Hz, 1H), 3.06 (dd, *J* =

17.9 and 8.9 Hz, 1H), 2.84 (dd,  $J = 17.9$  and  $6.2$  Hz, 1H), 2.02-1.95 (m, 2H), 1.92-1.86 (m, 3H), 1.77-1.69 (m, 1H), 1.59 (s, 3H);  $^{13}\text{C}$  NMR (150 MHz,  $\text{CDCl}_3$ )  $\delta$  174.89, 157.6 (ddd,  $J_{\text{C-F}} = 244.7, 10.6$  and  $3.2$  Hz), 150.5 (ddd,  $J_{\text{C-F}} = 250.2, 15.4$  and  $13.0$  Hz), 144.4 (ddd,  $J_{\text{C-F}} = 241.9, 12.8$  and  $4.0$  Hz), 143.3, 128.9 (dd,  $J_{\text{C-F}} = 12.3$  and  $8.3$  Hz), 118.9, 109.8 (dt,  $J_{\text{C-F}} = 23.9$  and  $3.3$  Hz), 104.8 (dd,  $J_{\text{C-F}} = 27.1$  and  $20.8$  Hz), 87.1, 43.2, 34.7, 34.5, 29.4, 23.7, 19.6;  $^{19}\text{F}$  NMR (376 MHz,  $\text{CDCl}_3$ )  $\delta$  -114.20 (dd,  $J_{\text{C-F}} = 14.6$  and  $3.3$  Hz), -132.59 (dd,  $J_{\text{C-F}} = 20.9$  and  $3.3$  Hz), -145.25 (dd,  $J_{\text{C-F}} = 20.9$  and  $14.6$  Hz); HRMS(EI) Calcd for  $\text{C}_{16}\text{H}_{16}\text{F}_3\text{O}_2$   $[\text{M} + \text{H}]^+$  : 297.1102, Found 297.1096; IR (KBr)  $\nu(\text{cm}^{-1})$  : 2935, 1778, 1635, 1500, 1346, 1232, 1011.

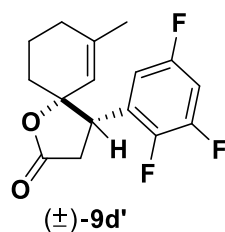

(±)-**9d'** : White solid; mp 93.7-94.0 °C;  $^1\text{H}$  NMR (600 MHz,  $\text{CDCl}_3$ )  $\delta$  6.91-6.85 (m, 1H), 6.79 – 6.60 (m, 1H), 5.52 (s, 1H), 3.86 (t,  $J = 8.1$  Hz, 1H), 3.05 (dd,  $J = 17.7$  and  $8.6$  Hz, 1H), 2.86 (dd,  $J = 17.7$  and  $7.5$  Hz, 1H), 1.98-1.95 (m, 1H), 1.87 – 1.81 (m, 1H), 1.75 (s, 3H), 1.73-1.71 (m, 1H), 1.69-1.66 (m, 1H), 1.56-1.52 (m, 1H), 1.27 – 1.22 (m, 1H);  $^{13}\text{C}$  NMR (150 MHz,  $\text{CDCl}_3$ )  $\delta$  174.6, 157.6 (ddd,  $J_{\text{C-F}} = 245.0, 10.5$  and  $2.9$  Hz), 149.8 (ddd,  $J_{\text{C-F}} = 250.4, 15.2$  and  $12.9$  Hz), 145.6 (ddd,  $J_{\text{C-F}} = 242.9, 13.0$  and  $4.1$  Hz), 143.7, 128.1 (dd,  $J_{\text{C-F}} = 12.9$  and  $8.4$  Hz), 122.0, 110.2 (dt,  $J_{\text{C-F}} = 24.0$  and  $3.2$  Hz), 104.9 (dd,  $J_{\text{C-F}} = 27.1$  and  $20.8$  Hz), 86.3, 44.0, 34.5, 30.2, 29.6, 23.7, 18.8;  $^{19}\text{F}$  NMR (376 MHz,  $\text{CDCl}_3$ )  $\delta$  -114.10 (dd,  $J_{\text{C-F}} = 14.6$  and  $3.4$  Hz), -132.08 (dd,  $J_{\text{C-F}} = 20.9$  and  $3.4$  Hz), -144.70 (dd,  $J_{\text{C-F}} = 20.9$  and  $14.7$  Hz); HRMS(EI) Calcd for  $\text{C}_{16}\text{H}_{15}\text{F}_3\text{O}_2$   $[\text{M}^+]$ : 296.1024, Found 296.1028; IR (KBr)  $\nu(\text{cm}^{-1})$  : 2941, 1774, 1608, 1496, 1369, 1234, 1126, 1003, 926.

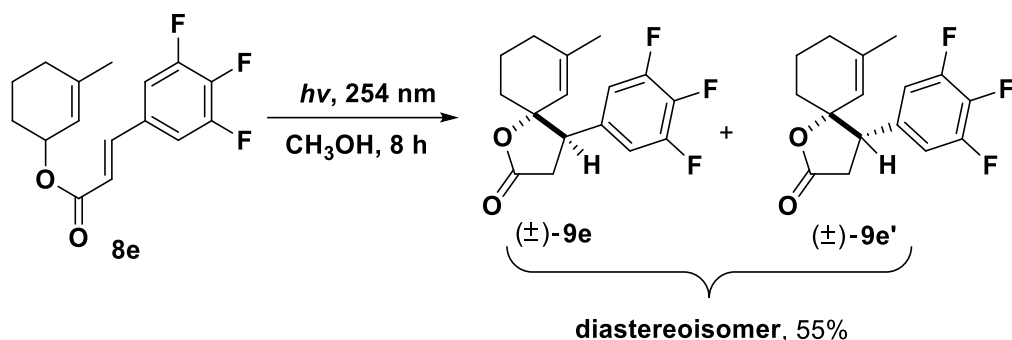

**7-Methyl-4-(3,4,5-trifluorophenyl)-1-oxaspiro[4.5]dec-6-en-2-one (±)-**9e** and (±)-**9e'**:** To a quartz Schlenk tube (15 mL) was added **8e** (29.6 mg, 0.1 mmol) and CH<sub>3</sub>OH (10 mL), the Schlenk tube was refilled with N<sub>2</sub>, and then the reaction mixture was exposed to ultraviolet light (254 nm). The reaction was monitored by TLC. When the starting material was completely consumed, the solvent was removed under reduced pressure, and the residue was purified by column chromatography on silica gel (petroleum ether/ethyl acetate = 20/1) to give product (±)-**9e** and (±)-**9e'** (16.3 mg, 55% yield).

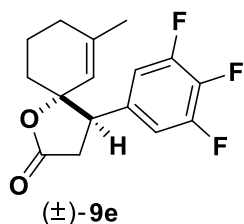

(±)-**9e**: White solid; mp 106.3-106.6 °C; <sup>1</sup>H NMR (600 MHz, CDCl<sub>3</sub>) δ 6.83-6.78 (m, 2H), 5.06 (s, 1H), 3.41 (t, *J* = 8.4 Hz, 1H), 2.99 (dd, *J* = 17.6 and 8.5 Hz, 1H), 2.84 (dd, *J* = 17.6 and 8.3 Hz, 1H), 2.04 – 1.94 (m, 2H), 1.88-1.81 (m, 3H), 1.71 – 1.67 (m, 1H), 1.61 (s, 3H); <sup>13</sup>C NMR (151 MHz, CDCl<sub>3</sub>) δ 174.62, 151.0 (ddd, *J*<sub>C-F</sub> = 249.2 and 9.8 and 4.1 Hz), 143.5, 139.0 (dt, *J*<sub>C-F</sub> = 250.9 and 15.1 Hz), 134.0-133.9 (m, 1C), 118.5, 112.3 (dd, *J*<sub>C-F</sub> = 16.8 and 4.5 Hz), 86.8, 50.2, 35.2, 34.4, 29.5, 23.8, 19.5; <sup>19</sup>F NMR (565 MHz, CDCl<sub>3</sub>) δ -133.37 (dd, *J* = 20.2 and 8.2 Hz), -161.05 (t, *J* = 20.2 Hz); HRMS(EI) Calcd for C<sub>16</sub>H<sub>16</sub>F<sub>3</sub>O<sub>2</sub> [M + H]<sup>+</sup> : 297.1102, Found 297.1096; IR (KBr) ν(cm<sup>-1</sup>) : 2945, 1755, 1620, 1533, 1452, 1338, 1246, 1039, 931.

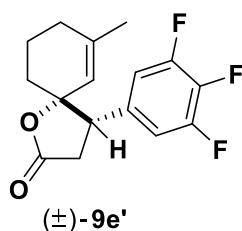

(±)-**9e'**: White solid; mp 144.3-144.6 °C;  $^1\text{H}$  NMR (600 MHz,  $\text{CDCl}_3$ )  $\delta$  6.83-6.80 (m, 2H), 5.48 (s, 1H), 3.51 (t,  $J = 2.2\text{Hz}$ , 1H), 2.95-2.83 (m, 2H), 1.99-1.96 (m, 1H), 1.85 – 1.82 (m, 1H), 1.79 (s, 3H), 1.75-1.67 (m, 1H), 1.62-1.61 (m, 1H), 1.49-1.44 (m, 1H), 1.20-1.15 (m, 1H);  $^{13}\text{C}$  NMR (150 MHz,  $\text{CDCl}_3$ )  $\delta$  174.3, 151.1 (ddd,  $J_{\text{C-F}} = 249.5, 9.9$  and 4.2 Hz), 145.1, 139.0 (dt,  $J_{\text{C-F}} = 250.9$  and 15.1 Hz), 133.3-133.2 (m, 1C), 122.0, 112.0 (dd,  $J_{\text{C-F}} = 16.7$  and 4.5 Hz), 86.4, 50.3, 33.9, 29.66, 29.65, 23.8, 18.6;  $^{19}\text{F}$  NMR (565 MHz,  $\text{CDCl}_3$ )  $\delta$  -133.12 (dd,  $J = 19.2$  and 7.3 Hz), -160.95 (t,  $J = 19.9$  Hz); HRMS(EI) Calcd for  $\text{C}_{16}\text{H}_{16}\text{F}_3\text{O}_2$   $[\text{M} + \text{H}]^+$  : 297.1102, Found 297.1096; IR (KBr)  $\nu(\text{cm}^{-1})$  : 2947, 1763, 1620, 1533, 1448, 1365, 1336, 1240, 1038.

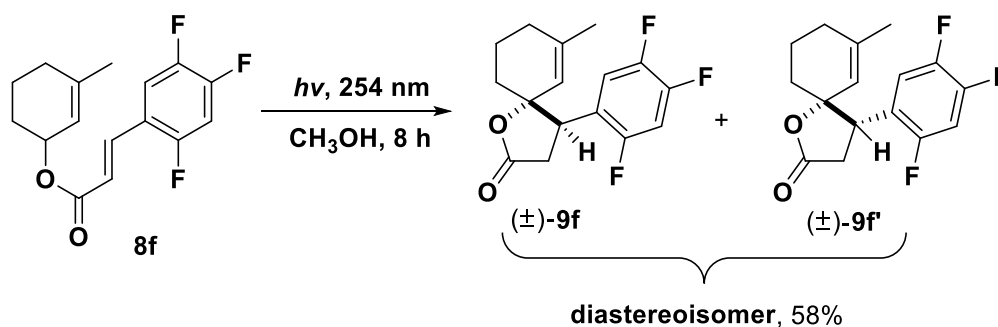

**7-Methyl-4-(2,4,5-trifluorophenyl)-1-oxaspiro[4.5]dec-6-en-2-one (±)-9f and (±)-9f'**: To a quartz schlenk tube (15 mL) was added **8f** (29.6 mg, 0.1 mmol) and  $\text{CH}_3\text{OH}$  (10 mL), the schlenk tube was refilled with  $\text{N}_2$ , and then the reaction mixture was exposed to ultraviolet light (254 nm). The reaction was monitored by TLC. When the starting material was completely consumed, the solvent was removed under reduced pressure, and the residue was purified by column chromatography on silica gel (petroleum ether/ethyl acetate = 20/1) to give product (±)-**9f** and (±)-**9f'** (17.2 mg, 58% yield).

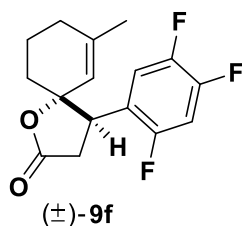

(±)-**9f**: White solid; mp 113.6-113.8 °C; <sup>1</sup>H NMR (600 MHz, CDCl<sub>3</sub>) δ 7.03 – 6.99 (m, 1H), 6.95-6.91 (m, 1H), 5.03 (s, 1H), 3.77 (d, *J* = 8.2 Hz, 1H), 3.04 (dd, *J* = 17.8 and 8.9 Hz, 1H), 2.83 (dd, *J* = 17.8 and 6.6 Hz, 1H), 2.00-1.95 (m, 2H), 1.87 – 1.84 (m, 3H), 1.74 – 1.68 (m, 1H), 1.59 (s, 3H); <sup>13</sup>C NMR (150 MHz, CDCl<sub>3</sub>) δ 175.0, 155.7 (ddd, *J*<sub>C-F</sub> = 243.5, 9.2 and 2.4 Hz), 149.2 (dt, *J*<sub>C-F</sub> = 250.5 and 13.7 Hz), 146.8 (ddd, *J*<sub>C-F</sub> = 244.1, 12.2 and 3.4 Hz), 143.2, 121.9 (dt, *J*<sub>C-F</sub> = 19.8 and 5.4 Hz), 118.9, 116.5 (dd, *J*<sub>C-F</sub> = 19.8 and 5.4 Hz), 105.8 (dd, *J*<sub>C-F</sub> = 29.1 and 20.5 Hz), 87.2, 43.0, 34.7, 34.4, 29.4, 23.7, 19.6; <sup>19</sup>F NMR (565 MHz, CDCl<sub>3</sub>) δ -116.79, -133.90 (t, *J* = 10.3 Hz), -141.45 (d, *J* = 8.9 Hz); HRMS(EI) Calcd for C<sub>16</sub>H<sub>16</sub>F<sub>3</sub>O<sub>2</sub> [M + H]<sup>+</sup>: 297.1102, Found 297.1096; IR (film) ν(cm<sup>-1</sup>): 2939, 1751, 1630, 1508, 1427, 1336, 1242, 1163, 1080, 937.

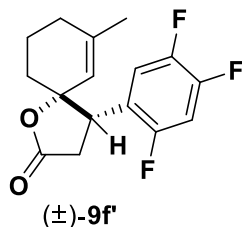

(±)-**9f'**: White solid; mp 100.6-100.9 °C; <sup>1</sup>H NMR (600 MHz, CDCl<sub>3</sub>) δ 7.03-6.99 (m, 1H), 6.97-6.92 (m, 1H), 5.50 (s, 1H), 3.78 (t, *J* = 8.1 Hz, 1H), 3.03 (dd, *J* = 17.6 and 8.6 Hz, 1H), 2.85 (dd, *J* = 17.6 and 7.7 Hz, 1H), 1.98-1.94 (m, 1H), 1.88-1.80 (m, 1H), 1.74 (s, 3H), 1.68-1.65 (m, 1H), 1.55 – 1.50 (m, 1H), 1.26 – 1.21 (m, 2H); <sup>13</sup>C NMR (150 MHz, CDCl<sub>3</sub>) δ 174.8, 155.9 (ddd, *J*<sub>C-F</sub> = 244.3, 9.1 and 2.6 Hz), 149.3 (ddd, *J*<sub>C-F</sub> = 250.9, 14.1 and 13.0 Hz), 146.8 (ddd, *J*<sub>C-F</sub> = 244.5, 12.5 and 3.6 Hz), 143.5, 122.1, 121.2 (dt, *J*<sub>C-F</sub> = 16.4 and 4.6 Hz), 116.8 (dd, *J*<sub>C-F</sub> = 19.9 and 6.1 Hz), 106.0 (dd, *J*<sub>C-F</sub> = 29.0 and 20.5 Hz), 86.4, 43.9, 34.5, 30.2, 29.6, 23.7, 18.8; <sup>19</sup>F NMR (565 MHz, CDCl<sub>3</sub>) δ -116.18, -133.65 (t, *J* = 10.2 Hz), -141.32 (d, *J* = 7.5 Hz); HRMS(EI) Calcd for C<sub>16</sub>H<sub>15</sub>F<sub>3</sub>O<sub>2</sub> [M]<sup>+</sup>: 296.1024, Found 296.1023; IR (film) ν(cm<sup>-1</sup>): 3428, 2929, 1768, 1630, 1519, 1427, 1334, 1217, 1152, 940, 841.

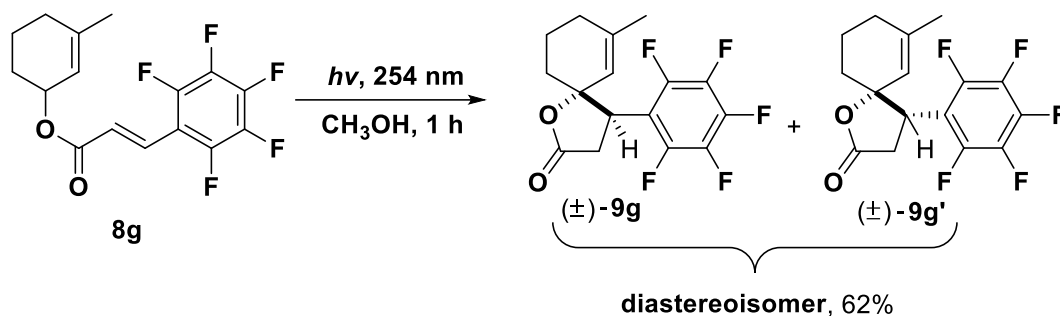

**7-Methyl-4-(perfluorophenyl)-1-oxaspiro[4.5]dec-6-en-2-one (±)-9g and (±)-9g':**

To a quartz Schlenk tube (15 mL) was added **8g** (33.2 mg, 0.1 mmol) and CH<sub>3</sub>OH (10 mL), the Schlenk tube was refilled with N<sub>2</sub>, and then the reaction mixture was exposed to ultraviolet light (254 nm). The reaction was monitored by TLC. When the starting material was completely consumed, the solvent was removed under reduced pressure, and the residue was purified by column chromatography on silica gel (petroleum ether/ethyl acetate 20/1) to give product **(±)-9g and (±)-9g'** (20.6 mg, 62% yield).

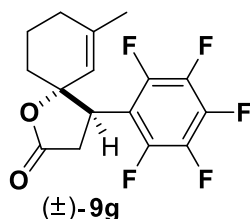

**(±)-9g:** White solid; mp 136.6-136.8 °C; <sup>1</sup>H NMR (600 MHz, CDCl<sub>3</sub>) δ 5.13 (s, 1H), 3.91 (dd, *J* = 9.4 and 5.8 Hz, 1H), 3.09 – 2.99 (m, 2H), 2.00 – 1.96 (m, 2H), 1.89-1.87 (m, 3H), 1.72 – 1.70 (m, 1H), 1.60 (s, 3H); <sup>13</sup>C NMR (150 MHz, CDCl<sub>3</sub>) δ 174.5, 146.2-145.9 (m, 1C), 143.7, 141.4-141.1 (m, 1C), 138.9-136.7 (m, 1C), 119.0, 112.6 (td, *J*<sub>C-F</sub> = 16.8 and 4.3 Hz), 85.6, 40.6, 34.9, 33.6, 29.3, 23.7, 19.6; <sup>19</sup>F NMR (565 MHz, CDCl<sub>3</sub>) δ -139.49 (d, *J* = 18.5 Hz), -153.83 (t, *J* = 20.9 Hz), -160.97 (td, *J* = 22.0 and 4.0 Hz); HRMS(EI) Calcd for C<sub>16</sub>H<sub>14</sub>F<sub>5</sub>O<sub>2</sub> [M + H]<sup>+</sup> : 333.0914, Found 333.0907; IR (film) ν(cm<sup>-1</sup>): 2931, 1770, 1657, 1498, 1300, 1211, 1119, 985.

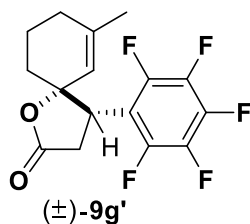

**(±)-9g':** White solid; mp 122.5-122.8 °C; <sup>1</sup>H NMR (600 MHz, CDCl<sub>3</sub>) δ 5.47 (s, 1H),

3.92 (dd,  $J = 9.2$  and  $7.4$  Hz, 1H), 3.11 – 3.02 (m, 2H), 2.00 – 1.96 (m, 1H), 1.89 – 1.80 (m, 2H), 1.75 (s, 3H), 1.62-1.60 (m, 1H), 1.28 – 1.23 (m, 2H);  $^{13}\text{C}$  NMR (150 MHz,  $\text{CDCl}_3$ )  $\delta$  174.2, 146.5-144.6 (m, 1C), 143.8, 141.5-139.6 (m, 1C), 138.7-136.8 (m, 1C), 121.8, 111.6-111.4 (m, 1C), 85.6, 41.3, 33.3, 30.5, 29.5, 23.7, 18.9;  $^{19}\text{F}$  NMR (565MHz,  $\text{CDCl}_3$ )  $\delta$  -138.91, -153.53 (t,  $J = 20.9$  Hz), -160.73 (td,  $J = 21.0$  and  $6.0$  Hz); HRMS(EI) Calcd for  $\text{C}_{16}\text{H}_{13}\text{F}_5\text{O}_2$  [ $\text{M}^+$ ]: 332.0836, Found 332.0844; IR (film)  $\nu(\text{cm}^{-1})$ : 2935, 1774, 1529, 1499, 1426, 1245, 1211, 1192, 1120, 993, 967, 938, 893, 805.

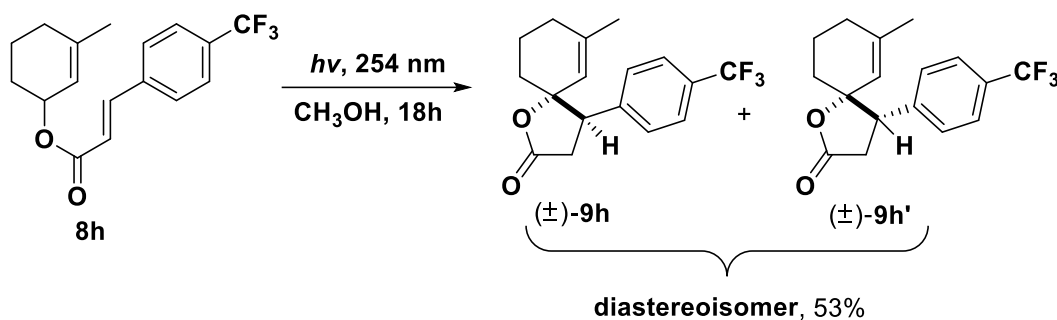

**7-Methyl-4-(4-(trifluoromethyl)phenyl)-1-oxaspiro[4.5]dec-6-en-2-one (±)-9h and (±)-9h'**: To a quartz Schlenk tube (15 mL) was added **8h** (31.0 mg, 0.1 mmol) and  $\text{CH}_3\text{CN}$  (10 mL), the Schlenk tube was refilled with  $\text{N}_2$ , and then the reaction mixture was exposed to ultraviolet light (254 nm). The reaction was monitored by TLC. When the starting material was completely consumed, the solvent was removed under reduced pressure, and the residue was purified by column chromatography on silica gel (petroleum ether/ethyl acetate = 20/1) to give product **(±)-9h and (±)-9h'** (16.4 mg, 53% yield).

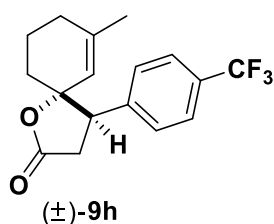

**(±)-9h**: White solid; 75.9-76.1 °C;  $^1\text{H}$  NMR (600 MHz,  $\text{CDCl}_3$ )  $\delta$  7.59 (d,  $J = 8.1$  Hz, 2H), 7.30 (d,  $J = 8.1$  Hz, 2H), 5.09 (s, 1H), 3.55 (t,  $J = 8.4$  Hz, 1H), 3.05 – 2.94 (m, 2H), 2.07-2.04 (m, 1H), 1.96-1.92 (m, 1H), 1.88 – 1.85 (m, 2H), 1.84-1.80 (m, 1H), 1.73 – 1.68 (m, 1H), 1.56 (s, 3H);  $^{13}\text{C}$  NMR (150 MHz,  $\text{CDCl}_3$ )  $\delta$  175.2, 143.0, 141.6, 129.8 (q,  $J_{\text{C-F}} = 32.3$  Hz), 128.6, 125.5 (q,  $J_{\text{C-F}} = 3.6$  Hz), 124.2 (q,  $J_{\text{C-F}} = 270.5$  Hz),

118.9, 87.1, 50.8, 35.3, 34.5, 29.5, 23.8, 19.6;  $^{19}\text{F}$  NMR (565 MHz,  $\text{CDCl}_3$ )  $\delta$  -62.55; HRMS(EI) Calcd for  $\text{C}_{17}\text{H}_{18}\text{F}_3\text{O}_2$   $[\text{M} + \text{H}]^+$  : 311.1259, Found 311.1252; IR (KBr)  $\nu(\text{cm}^{-1})$  : 2924, 1770, 1620, 1429, 1327, 1124, 1070, 939.

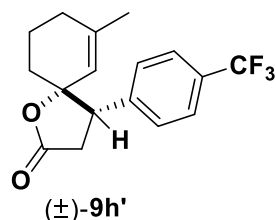

(±)-9h': White solid; 84.5-84.7 °C;  $^1\text{H}$  NMR (600 MHz,  $\text{CDCl}_3$ )  $\delta$  7.59 (d,  $J = 8.2$  Hz, 2H), 7.29 (d,  $J = 8.2$  Hz, 2H), 5.54 (s, 1H), 3.64 (t,  $J = 9.0$  Hz, 1H), 3.02-2.94 (m, 2H), 1.95 (dt,  $J = 17.6$  and 4.1 Hz, 1H), 1.78 (s, 3H), 1.72-1.66 (m, 1H), 1.63 – 1.59 (m, 2H), 1.44-1.39 (m, 1H), 1.18-1.11 (m, 1H);  $^{13}\text{C}$  NMR (150 MHz,  $\text{CDCl}_3$ )  $\delta$  175.0, 144.5, 141.0, 129.9 (q,  $J_{\text{C-F}} = 32.5$  Hz), 128.5, 128.2, 125.5 (q,  $J_{\text{C-F}} = 3.7$  Hz), 123.9 (q,  $J_{\text{C-F}} = 270.3$  Hz), 122.4, 111.6, 86.7, 50.8, 34.1, 29.8, 29.6, 23.8, 18.6;  $^{19}\text{F}$  NMR (565 MHz,  $\text{CDCl}_3$ )  $\delta$  -62.58 ; HRMS(EI) Calcd for  $\text{C}_{17}\text{H}_{18}\text{F}_3\text{O}_2$   $[\text{M} + \text{H}]^+$  : 311.1259, Found 311.1252; IR (KBr)  $\nu(\text{cm}^{-1})$  : 2941, 1770, 1620, 1439, 1332, 1120, 1070, 935.

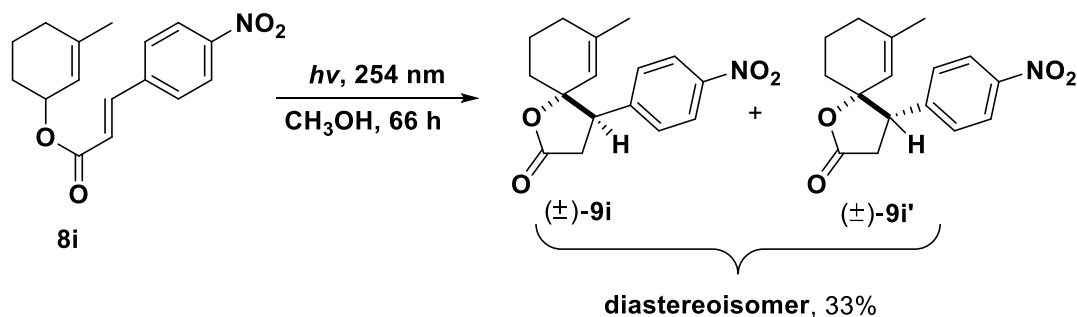

**7-Methyl-4-(4-nitrophenyl)-1-oxaspiro[4.5]dec-6-en-2-one (±)-9i and (±)-9i'**: To a quartz Schlenk tube (15 mL) was added 8i (28.7 mg, 0.1 mmol) and  $\text{CH}_3\text{OH}$  (10 mL), the Schlenk tube was refilled with  $\text{N}_2$ , and then the reaction mixture was exposed to ultraviolet light (254 nm). The reaction was monitored by TLC. When the starting material was completely consumed, the solvent was removed under reduced pressure, and the residue was purified by column chromatography on silica gel (petroleum ether/ethyl acetate = 20/1) to give product (±)-9i and (±)-9i' (9.5 mg, 33% yield). Colorless oil;  $^1\text{H}$  NMR (600 MHz,  $\text{CDCl}_3$ )  $\delta$  8.21 – 7.19 (m, 3.01 H), 7.37-7.35 (m, 3.16 H), 5.55 (s, 0.49 H), 5.04 (s, 1.00 H), 3.69 (t,  $J = 9.0$  Hz, 0.51 H), 3.61 (t,  $J = 8.2$



Hz, 1.04 H), 3.09 – 2.95 (m, 3.23 H), 2.08 – 2.05 (m, 1.16 H), 1.98 – 1.94 (m, 1.80 H), 1.91-1.86 (m, 2.22 H), 1.84-1.81 (m, 0.82 H), 1.79 (s, 3.28 H), 1.72-1.68 (m, 2.00 H), 1.63-1.60 (m, 3.33 H), 1.56 (s, 3.60 H), 1.42-1.39 (m, 0.93 H), 1.15-1.10 (m, 0.81H);  $^{13}\text{C}$  NMR (150 MHz,  $\text{CDCl}_3$ )  $\delta$  174.9, 174.5, 147.4, 147.3, 145.2, 144.9, 144.4, 143.5, 129.1, 128.7, 123.8, 123.7, 122.1, 118.8, 87.0, 86.6, 50.9, 50.8, 35.3, 34.5, 34.0, 29.9, 29.6, 29.5, 23.84, 23.77, 19.6, 18.6; HRMS(EI) Calcd for  $\text{C}_{16}\text{H}_{17}\text{NO}_4$  [ $\text{M}^+$ ]: 287.1158, Found 287.1164; IR (film)  $\nu(\text{cm}^{-1})$ : 3433, 2924, 1759, 1632, 1604, 1519, 1350, 1229, 1109, 1077, 936.

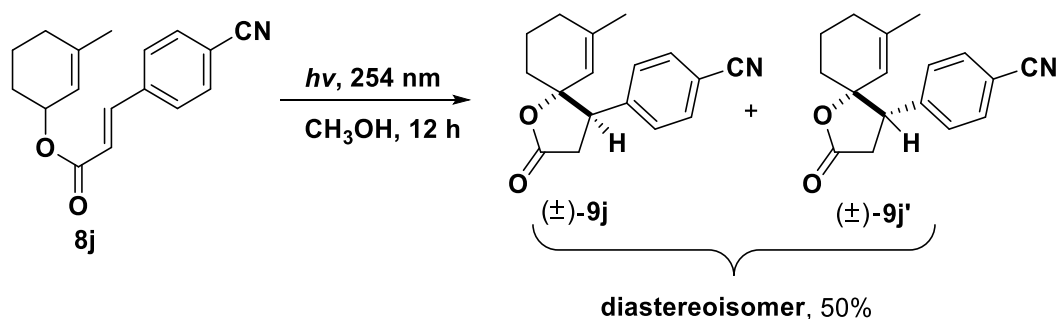

**4-(7-Methyl-2-oxo-1-oxaspiro[4.5]dec-6-en-4-yl)benzonitrile (±)-9j and (±)-9j'**: To a quartz Schlenk tube (15 mL) was added 8j (26.7 mg, 0.1 mmol) and  $\text{CH}_3\text{OH}$  (10 mL), the Schlenk tube was refilled with  $\text{N}_2$ , and then the reaction mixture was exposed to ultraviolet light (254 nm). The reaction was monitored by TLC. When the starting material was completely consumed, the solvent was removed under reduced pressure, and the residue was purified by column chromatography on silica gel (petroleum ether/ethyl acetate = 20/1) to give product (±)-9j and (±)-9j' (13.4 mg, 50% yield).

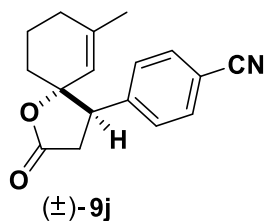

**(±)-9j** : White solid; mp 125.5-125.6 °C;  $^1\text{H}$  NMR (600 MHz,  $\text{CDCl}_3$ )  $\delta$  7.63 (d,  $J = 8.2$  Hz, 2H), 7.29 (d,  $J = 8.2$  Hz, 2H), 5.02 (s, 1H), 3.54 (t,  $J = 8.2$  Hz, 1H), 3.04 (dd,  $J = 17.7$  and 8.4 Hz, 1H), 2.93 (dd,  $J = 17.6$  and 8.0 Hz, 1H), 2.06-2.03 (m, 1H), 1.96-1.93 (m, 1H), 1.88-1.85 (m, 2H), 1.83 – 1.78 (m, 1H), 1.71 – 1.66 (m, 1H), 1.56 (s, 3H);  $^{13}\text{C}$

NMR (150 MHz, CDCl<sub>3</sub>)  $\delta$  174.9, 143.3, 143.1, 132.3, 129.0, 118.9, 118.4, 111.6, 87.0, 50.9, 35.2, 34.5, 29.5, 23.8, 19.6; HRMS(EI) Calcd for C<sub>17</sub>H<sub>17</sub>NO<sub>2</sub> [M<sup>+</sup>] : 267.1259, Found 267.1263; IR (KBr)  $\nu$ (cm<sup>-1</sup>) : 2945, 2225, 1766, 1608, 1431, 1232, 1074, 933.

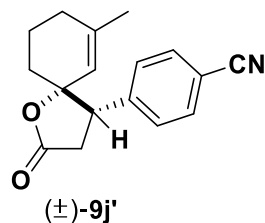

(±)-**9j'** : White solid; mp 139.0-139.2 °C; <sup>1</sup>H NMR (600 MHz, CDCl<sub>3</sub>)  $\delta$  7.64 (d, *J* = 8.3 Hz, 2H), 7.30 (d, *J* = 8.3 Hz, 2H), 5.53 (s, 1H), 3.63 (t, *J* = 9.0 Hz, 1H), 2.97 (dd, *J* = 9.0 and 1.5 Hz, 2H), 1.98 – 1.94 (m, 1H), 1.85-1.74 (m, 4H), 1.72 – 1.65 (m, 1H), 1.61 – 1.58 (m, 1H), 1.43 – 1.38 (m, 1H), 1.14 – 1.09 (m, 1H); <sup>13</sup>C NMR (150 MHz, CDCl<sub>3</sub>)  $\delta$  174.6, 144.7, 142.4, 132.4, 128.6, 122.2, 118.4, 111.6, 86.6, 51.0, 33.9, 29.9, 29.6, 23.8, 18.6; HRMS(EI) Calcd for C<sub>17</sub>H<sub>17</sub>NO<sub>2</sub> [M<sup>+</sup>]: 267.1259, Found 267.1258; IR (KBr)  $\nu$ (cm<sup>-1</sup>) : 3430, 2943, 2917, 2226, 1762, 1668, 1609, 1508, 1429, 1233, 1076, 959, 934.

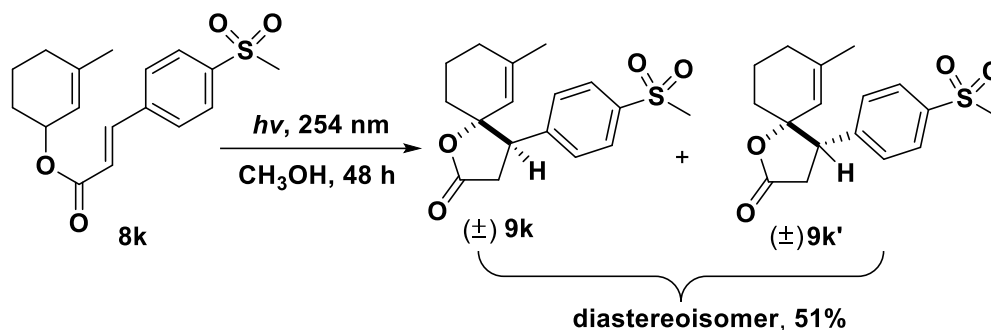

**7-Methyl-4-(4-(methylsulfonyl)phenyl)-1-oxaspiro[4.5]dec-6-en-2-one (9k)** : To a quartz Schlenk tube (15 mL) was added **8k** (32.0 mg, 0.1 mmol) and CH<sub>3</sub>OH (10 mL), the Schlenk tube was refilled with N<sub>2</sub>, and then the reaction mixture was exposed to ultraviolet light (254 nm). The reaction was monitored by TLC. When the starting material was completely consumed, the solvent was removed under reduced pressure, and the residue was purified by column chromatography on silica gel (petroleum ether/ethyl acetate = 10/1) to give product **(±)-9k and (±)-9k'** (15.4 mg, 51% yield). Colorless oil; <sup>1</sup>H NMR (400 MHz, CDCl<sub>3</sub>)  $\delta$  7.90 (dd, *J* = 8.4 and 2.8 Hz, 3.54 H), 7.39 (dd, *J* = 8.4 and 2.5 Hz, 3.70 H), 5.54 (s, 1.02 H), 5.06 (s, 1 H), 3.66 (t, *J* = 9.0 Hz, 1.18

H), 3.58 (t,  $J = 8.3$  Hz, 1.16 H), 3.06 (s, 5.37 H), 3.07 – 2.92 (m, 3.42 H), 2.06-2.03 (m, 1H), 1.97-1.90 (m, 2.13 H), 1.89 – 1.82 (m, 2.72 H), 1.78 (s, 3.31 H), 1.72-1.59 (m, 3.79 H), 1.55 (s, 2.75 H), 1.44-1.38 (m, 1.5 H), 1.58-1.09 (m, 1.27 H);  $^{13}\text{C}$  NMR (100 MHz,  $\text{CDCl}_3$ )  $\delta$  174.8, 174.5, 144.7, 144.1, 143.4, 143.3, 139.9, 139.8, 129.2, 128.8, 127.7, 127.6, 122.3, 118.8, 87.0, 86.6, 50.94, 50.88, 44.4, 35.4, 34.5, 34.1, 29.9, 29.6, 29.5, 23.8, 23.7, 19.6, 18.6; HRMS(EI) Calcd for  $\text{C}_{17}\text{H}_{20}\text{O}_4\text{S}$   $[\text{M} + \text{H}]^+$  : 321.1161, Found 321.1151; IR (KBr) ( $\text{cm}^{-1}$ ): 1760, 1305, 1233, 1092, 933, 912, 728.

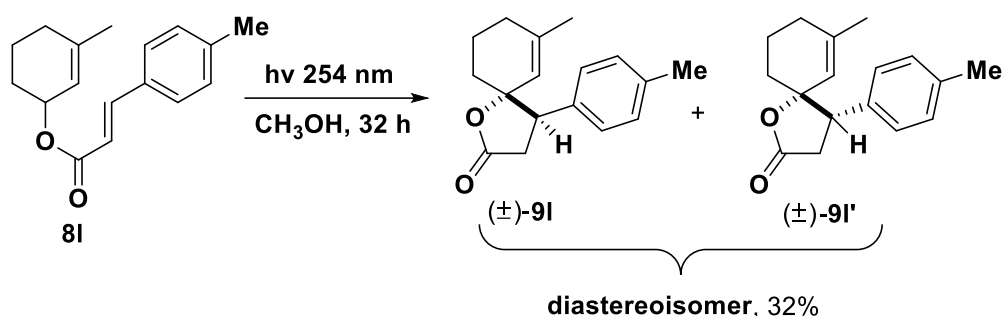

**7-Methyl-4-(p-tolyl)-1-oxaspiro[4.5]dec-6-en-2-one (±)-9I and (±)-9I'**: To a quartz schlenk tube (15 mL) was added **81** (25.6 mg, 0.1 mmol) and  $\text{CH}_3\text{OH}$  (10 mL), the schlenk tube was refilled with  $\text{N}_2$ , and then the reaction mixture was exposed to ultraviolet light (254 nm). The reaction was monitored by TLC. When the starting material was completely consumed, the solvent was removed under reduced pressure, and the residue was purified by column chromatography on silica gel (petroleum ether/ethyl acetate = 20/1) to give product **(±)-9I and (±)-9I'** (8.2 mg, 32% yield). Colorless oil;  $^1\text{H}$  NMR (600 MHz,  $\text{CDCl}_3$ )  $\delta$  7.14-7.11 (m, 4.07 H), 7.06 – 7.05 (m, 4.28 H), 5.52 (s, 1.00 H), 5.17 (s, 0.86 H), 3.54 (t,  $J = 9.1$  Hz, 1.03 H), 3.45 (t,  $J = 8.7$  Hz, 1.01H), 2.99-2.88 (m, 4.30 H), 2.33 (s, 6.33 H), 2.03-1.99 (m, 1.12 H), 1.93 – 1.83 (m, 4.17 H), 1.82-1.78 (m, 1.36 H), 1.76 (s, 3.85 H), 1.70-1.62 (m, 2.62 H), 1.61-1.58 (m, 1.20 H), 1.55 (s, 3.00 H), 1.421– 1.36 (m, 1.21 H), 1.25 – 1.19 (m, 1.80 H);  $^{13}\text{C}$  NMR (150 MHz,  $\text{CDCl}_3$ )  $\delta$  175.9, 175.8, 143.6, 142.1, 137.2, 137.1, 134.1, 133.7, 129.2, 129.1, 128.0, 127.6, 122.9, 119.3, 87.4, 87.2, 50.6, 35.4, 34.3, 34.2, 29.7, 29.6, 29.5, 23.8, 23.7, 21.0, 19.6, 18.7; HRMS(EI) Calcd for  $\text{C}_{17}\text{H}_{21}\text{O}_2$   $[\text{M} + \text{H}]^+$  : 257.1542, Found 257.1534; IR (film)  $\nu$  ( $\text{cm}^{-1}$ ): 2934, 1771, 1518, 1233, 934.

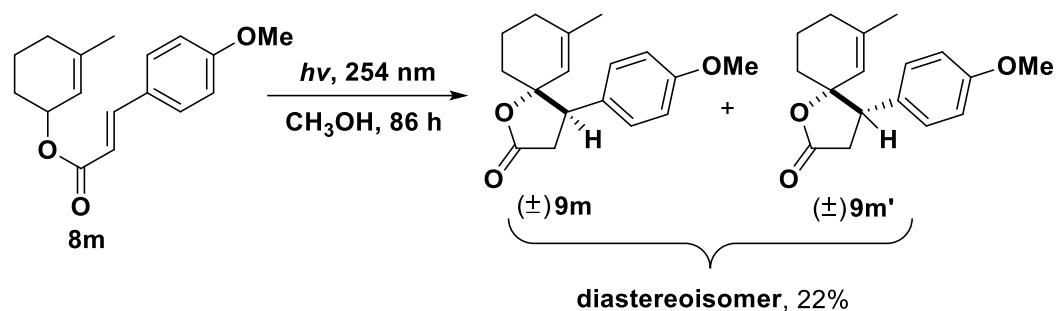

**(4R,5R)-4-(4-methoxyphenyl)-7-methyl-1-oxaspiro[4.5]dec-6-en-2-one (±)-9m and (±)-9m'**: To a quartz Schlenk tube (15 mL) was added **8m** (27.2 mg, 0.1 mmol) and CH<sub>3</sub>OH (10 mL), the Schlenk tube was refilled with N<sub>2</sub>, and then the reaction mixture was exposed to ultraviolet light (254 nm). The reaction was monitored by TLC. When the starting material was completely consumed, the solvent was removed under reduced pressure, and the residue was purified by column chromatography on silica gel (petroleum ether/ethyl acetate = 20/1) to give product (±)-**9m** and (±)-**9m'** (6.0 mg, 22% yield). Colorless oil; <sup>1</sup>H NMR (600 MHz, , CDCl<sub>3</sub>) δ 7.10-7.08 (m, 2.66 H), 6.86-6.84 (m, 2.81H), 5.51 (s, 1H), 5.16 (s, 0.59 H), 3.86-3.74 (m, 3.78 H), 3.53 (t, *J* = 9.2 Hz, 0.88 H), 3.44 (t, *J* = 8.7 Hz, 0.51 H), 2.97 – 2.88 (m, 2.53 H), 2.03-1.98 (m, 0.55 H), 1.94 – 1.91 (m, 1.3 H), 1.87 – 1.83 (m, 0.91 H), 1.81- 1.79 (m, 0.72 H), 1.76 (s, 3.21 H), 1.70-1.64 (m, 1.57 H), 1.63-1.61 (m, 1.56 H), 1.59-1.58 (s, 0.66 H), 1.56 (s, 1.27 H), 1.41-1.35 (m, 1.05 H), 1.25 – 1.20 (m, 1.68 H); <sup>13</sup>C NMR (150 MHz, CDCl<sub>3</sub>) δ 175.9, 175.8, 143.6, 142.1, 137.2, 137.1, 134.1, 133.7, 129.2, 129.1, 128.0, 127.6, 122.9, 119.3, 87.4, 87.2, 50.6, 35.4, 34.3, 34.2, 29.7, 29.6, 29.5, 23.8, 23.7, 21.0, 19.6, 18.7; HRMS(EI) Calcd for C<sub>17</sub>H<sub>21</sub>O<sub>3</sub> [M + H]<sup>+</sup> : 273.1491, Found 273.1485; IR (film) ν (cm<sup>-1</sup>): 2933, 1770, 1612, 1516, 1442, 1250, 1034, 933, 833.

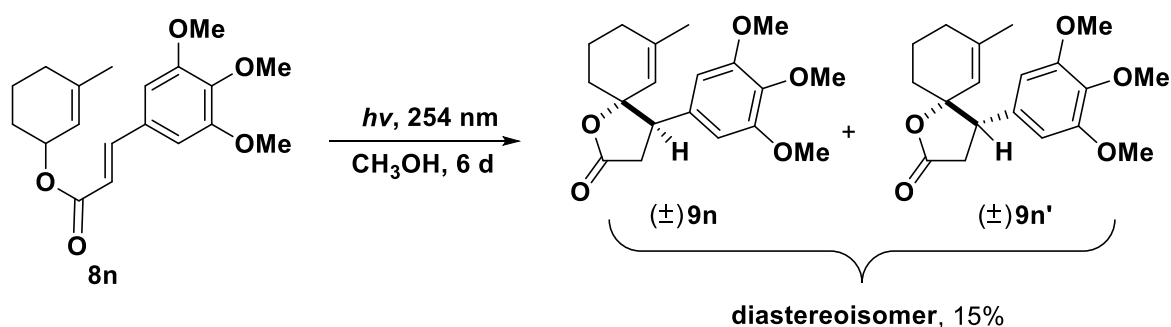

**7-Methyl-4-(3,4,5-trimethoxyphenyl)-1-oxaspiro[4.5]dec-6-en-2-one (±)-9n and**

(±)-**9n'**: To a quartz Schlenk tube (15 mL) was added **8n** (33.2 mg, 0.1 mmol) and CH<sub>3</sub>OH (10 mL), the Schlenk tube was refilled with N<sub>2</sub>, and then the reaction mixture was exposed to ultraviolet light (254 nm). The reaction was monitored by TLC. When the starting material was completely consumed, the solvent was removed under reduced pressure, and the residue was purified by column chromatography on silica gel (petroleum ether/ethyl acetate = 20/1) to give product (±)-**9n** and (±)-**9n'** (5.0 mg, 15% yield). Colorless oil; <sup>1</sup>H NMR (600 MHz, CDCl<sub>3</sub>) δ 6.35 (s, 2.79 H), 5.53 (s, 1.0 H), 5.17 (s, 0.73 H), 3.84 – 3.83 (m, 11.7 H), 3.50 (t, *J* = 8.9 Hz, 0.96 H), 3.39 (t, *J* = 8.2 Hz, 0.65 H), 3.02 – 2.88 (m, 3.00 H), 2.04 – 1.94 (m, 2.20 H), 1.87-1.81 (m, 2.38 H), 1.78 (s, 3.05 H), 1.72-1.63 (m, 3.83 H), 1.59 (s, 2.19 H), 1.49-1.41 (s, 1.27 H), 1.29-1.24 (s, 2.20 H); <sup>13</sup>C NMR (150 MHz, CDCl<sub>3</sub>) δ 175.8, 175.5, 153.15, 153.07, 143.7, 142.4, 137.29, 137.25, 133.3, 132.7, 122.9, 119.4, 105.2, 104.7, 87.4, 87.1, 60.9, 56.2, 56.1, 51.3, 51.0, 35.8, 34.5, 34.3, 29.71, 29.67, 29.56, 23.9, 23.8, 19.6, 18.8; HRMS(EI) Calcd for C<sub>19</sub>H<sub>25</sub>O<sub>5</sub> [M + H]<sup>+</sup> : 333.1702, Found 333.1694; IR (film) ν (cm<sup>-1</sup>): 2935, 1770, 1589, 1508, 1460, 1240, 1128, 1009, 924.

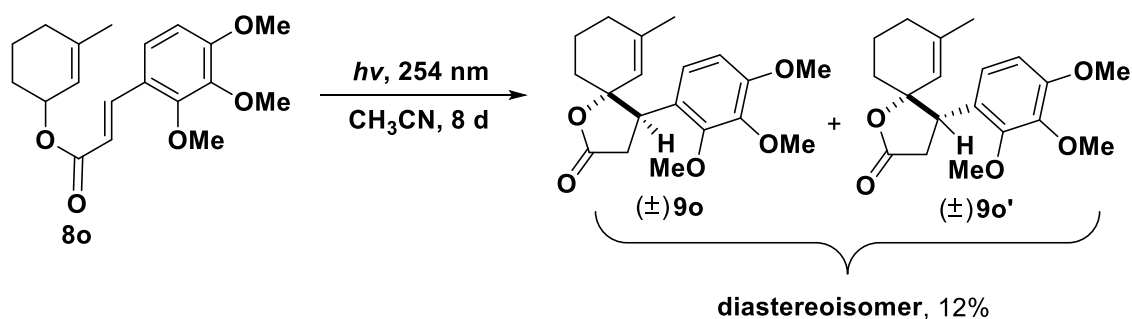

**7-Methyl-4-(2,3,4-trimethoxyphenyl)-1-oxaspiro[4.5]dec-6-en-2-one** (±)-**9o** and (±)-**9o'**: To a quartz Schlenk tube (15 mL) was added **8o** (33.2 mg, 0.1 mmol) and CH<sub>3</sub>CN (10 mL), the Schlenk tube was refilled with N<sub>2</sub>, and then the reaction mixture was exposed to ultraviolet light (254 nm). The reaction was monitored by TLC. When the starting material was completely consumed, the solvent was removed under reduced pressure, and the residue was purified by column chromatography on silica gel (petroleum ether/ethyl acetate = 20/1) to give product (±)-**9o** and (±)-**9o'** (4.0 mg, 12% yield). Colorless oil; <sup>1</sup>H NMR (600 MHz, CDCl<sub>3</sub>) δ 6.79-6.75 (m, 2.04 H), 6.62- 6.60 (m, 2.15 H), 5.53 (s, 1.00 H), 4.94 (s, 1.14 H), 3.86-3.85 (m, 8.53 H), 3.84-3.82 (m,

8.23 H), 3.79-3.77 (m, 2.37 H), 3.07-2.99 (m, 2.22 H), 2.80-2.71 (m, 2.30 H), 1.97 – 1.94 (m, 2.23 H), 1.90-1.83 (m, 4.13 H), 1.73 (s, 3.26 H), 1.67-1.60 (s, 3.23 H), 1.53 (s, 3.13 H), 1.50-1.48 (m, 1.02 H), 1.27-1.23 (m, 2.13 H);  $^{13}\text{C}$  NMR (150 MHz,  $\text{CDCl}_3$ )  $\delta$  176.9, 176.4, 153.1, 152.9, 152.1, 151.8, 141.9, 141.8, 141.4, 141.2, 124.9, 123.63, 123.55, 123.2, 122.4, 120.8, 106.7, 106.6, 87.9, 87.0, 60.9, 60.59, 60.58, 60.55, 55.89, 55.87, 44.9, 43.9, 35.9, 35.6, 34.9, 30.5, 29.591, 29.585, 23.74, 23.71, 19.7, 19.1; HRMS(EI) Calcd for  $\text{C}_{19}\text{H}_{25}\text{O}_5$   $[\text{M} + \text{H}]^+$ : 333.1702, Found 333.1694; IR (film)  $\nu$  ( $\text{cm}^{-1}$ ): 1759, 1601, 1466, 1101, 926.

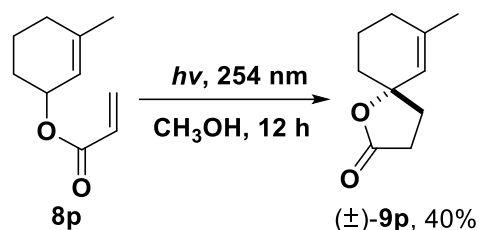

**7-Methyl-1-oxaspiro[4.5]dec-6-en-2-one (±)-9p:** To a quartz Schlenk tube (15 mL) was added **8p** (16.6 mg, 0.1 mmol) and  $\text{CH}_3\text{OH}$  (10 mL). The Schlenk tube was refilled with  $\text{N}_2$ , and then the reaction mixture was exposed to ultraviolet light (254 nm). The reaction was monitored by TLC. When the starting material was completely consumed, the solvent was removed under reduced pressure, and the residue was purified by column chromatography on silica gel (petroleum ether/ethyl acetate = 20/1) to give product (±)-**9p** (6.6 mg, 40% yield). Colorless oil;  $^1\text{H}$  NMR (400 MHz,  $\text{CDCl}_3$ )  $\delta$  5.36 (s, 1H), 2.59 (t,  $J = 8.2$  Hz, 2H), 2.07 (t,  $J = 8.2$  Hz, 2H), 1.99-1.87 (m, 3H), 1.83-1.79 (m, 1H), 1.70 (s, 3H), 1.67-1.61 (m, 2H);  $^{13}\text{C}$  NMR (100 MHz,  $\text{CDCl}_3$ )  $\delta$  176.7, 141.2, 123.1, 84.6, 34.3, 29.6, 28.9, 23.5, 19.6; HRMS(EI) Calcd for  $\text{C}_{10}\text{H}_{14}\text{O}_2$   $[\text{M}^+]$ : 166.0994, Found 166.0995; IR (film)  $\nu$  ( $\text{cm}^{-1}$ ): 3436, 2937, 1769, 1451, 1238, 1193, 1164, 941, 914.

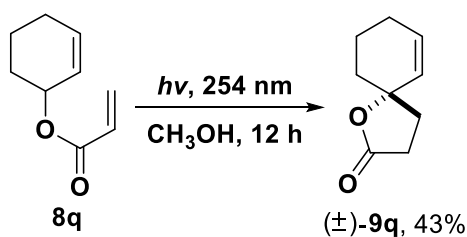

**Oxaspiro[4.5]dec-6-en-2-one (±)-9q:** To a quartz Schlenk tube (15 mL) was added **8q**

(15.2 mg, 0.1 mmol) and CH<sub>3</sub>OH (10 mL). The Schlenk tube was refilled with N<sub>2</sub>, and then the reaction mixture was exposed to ultraviolet light (254 nm). The reaction was monitored by TLC. When the starting material was completely consumed, the solvent was removed under reduced pressure, and the residue was purified by column chromatography on silica gel (petroleum ether/ethyl acetate = 20/1) to give product (±)-**9q** (6.5 mg, 43% yield). Colorless oil; <sup>1</sup>H NMR (600 MHz, CDCl<sub>3</sub>) δ 5.96 (dt, *J* = 10.0 and 3.7 Hz, 1H), 5.64 (d, *J* = 10.0 Hz, 1H), 2.62 (t, *J* = 8.2 Hz, 2H), 2.11 (t, *J* = 8.2 Hz, 2H), 2.03 – 1.97 (m, 3H), 1.87-1.80 (m, 1H), 1.76-1.72 (m, 1H), 1.68-1.64 (m, 1H); <sup>13</sup>C NMR (150 MHz, CDCl<sub>3</sub>) δ 176.8, 132.6, 128.4, 83.7, 34.5, 34.0, 28.8, 24.6, 19.3; HRMS(EI) Calcd for C<sub>9</sub>H<sub>12</sub>O<sub>2</sub> [M<sup>+</sup>]: 152.0837, Found 152.0834; IR (KBr) ν(cm<sup>-1</sup>): 2936, 1771, 1728, 1455, 1242, 1188, 1162, 1072, 1043, 1010.

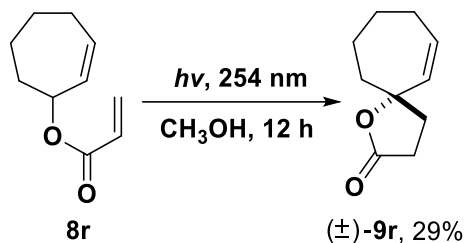

**1-Oxaspiro[4.6]undec-6-en-2-one (±)-9r:** To a quartz Schlenk (15 mL) tube was added **8r** (16.6 mg, 0.1 mmol) and CH<sub>3</sub>OH (10 mL). The Schlenk tube was refilled with N<sub>2</sub>, and then the reaction mixture was exposed to ultraviolet light (254 nm). The reaction was monitored by TLC. When the starting material was completely consumed, the solvent was removed under reduced pressure, and the residue was purified by column chromatography on silica gel (petroleum ether/ethyl acetate = 20/1) to give product (±)-**9r** (4.8 mg, 29% yield). Colorless oil; <sup>1</sup>H NMR (600 MHz, CDCl<sub>3</sub>) δ 5.86-5.82 (m, 1H), 5.71 (d, *J* = 11.9 Hz, 1H), 2.63-2.52 (m, 2H), 2.27-2.17 (m, 2H), 2.15-2.09 (m, 1H), 2.06-2.01 (m, 1H), 1.95-1.90 (m, 1H), 1.86-1.82 (m, 1H), 1.71-1.64 (m, 2H), 1.63-1.57 (m, 2H); <sup>13</sup>C NMR (150 MHz, CDCl<sub>3</sub>) δ 176.8, 135.1, 132.9, 89.4, 37.4, 33.8, 29.1, 27.8, 26.9, 24.1; HRMS(EI) Calcd for C<sub>10</sub>H<sub>14</sub>O<sub>2</sub> [M<sup>+</sup>]: 166.0994, Found 166.0993; IR (KBr) ν(cm<sup>-1</sup>): 2931, 2860, 1773, 1451, 1263, 1223, 1181, 1160, 1020, 971, 916.

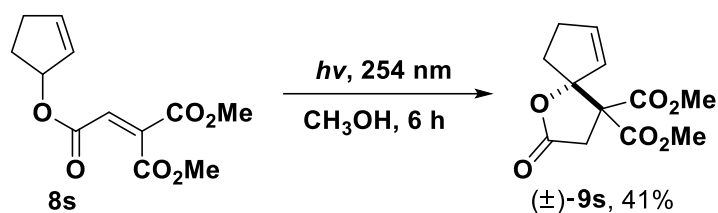

**Dimethyl 2-oxo-1-oxaspiro[4.4]non-6-ene-4,4-dicarboxylate (±)-9s:** To a quartz Schlenk tube (15 mL) was added 8s (25.4 mg, 0.1 mmol) and CH<sub>3</sub>OH (10 mL). The Schlenk tube was refilled with N<sub>2</sub>, and then the reaction mixture was exposed to ultraviolet light (254 nm). The reaction was monitored by TLC. When the starting material was completely consumed, the solvent was removed under reduced pressure, and the residue was purified by column chromatography on silica gel (petroleum ether/ethyl acetate = 20/1) to give product (±)-9s (10.4 mg, 41% yield). Colorless oil; <sup>1</sup>H NMR (600 MHz, CDCl<sub>3</sub>) δ 6.36 – 6.08 (m, 1H), 5.77 – 5.40 (m, 1H), 3.79 (s, 3H), 3.74 (s, 3H), 3.27 (d, *J* = 17.7 Hz, 1H), 2.97 (d, *J* = 17.7 Hz, 1H), 2.62 – 2.57 (m, 1H), 2.46 – 2.41 (m, 1H), 2.40 – 2.28 (m, 2H); <sup>13</sup>C NMR (150 MHz, CDCl<sub>3</sub>) δ 172.0, 168.6, 167.4, 140.3, 127.5, 98.5, 63.2, 53.2, 53.1, 37.3, 32.8, 31.5; HRMS(EI) Calcd for C<sub>12</sub>H<sub>15</sub>O<sub>6</sub> [M + H]<sup>+</sup> : 255.0869, Found 255.0863; IR (KBr) ν(cm<sup>-1</sup>) : 1766, 1739, 1437, 1267, 1038, 937.

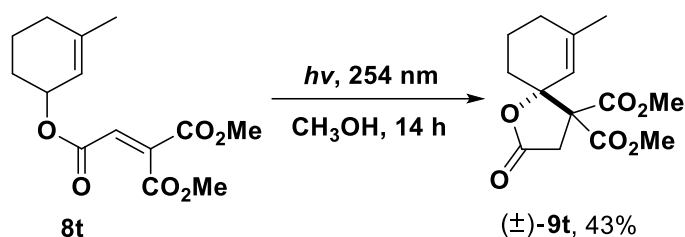

**Dimethyl 7-methyl-2-oxo-1-oxaspiro[4.5]dec-6-ene-4,4-dicarboxylate (±)-9t:** To a quartz Schlenk tube (15 mL) was added 8t (28.2 mg, 0.1 mmol) and CH<sub>3</sub>OH (10 mL). The Schlenk tube was refilled with N<sub>2</sub>, and then the reaction mixture was exposed to ultraviolet light (254 nm). The reaction was monitored by TLC. When the starting material was completely consumed, the solvent was removed under reduced pressure, and the residue was purified by column chromatography on silica gel (petroleum ether/ethyl acetate = 20/1) to give product (±)-9t (12.1mg, 43% yield). Colorless oil; <sup>1</sup>H NMR (600 MHz, CDCl<sub>3</sub>) δ 5.21 (s, 1H), 3.76 (s, 3H), 3.71 (s, 3H), 3.25 (d, *J* = 17.7 Hz,



1H), 2.92 (d,  $J = 17.7$  Hz, 1H), 2.03-1.98 (m, 1H), 1.95-1.91 (m, 3H), 1.77-1.75 (m, 2H), 1.69 (s, 3H);  $^{13}\text{C}$  NMR (150 MHz,  $\text{CDCl}_3$ )  $\delta$  172.3, 168.5, 167.4, 144.5, 117.6, 85.0, 63.5, 53.1, 52.8, 36.3, 29.9, 29.3, 23.8, 19.1; HRMS(EI) Calcd for  $\text{C}_{14}\text{H}_{19}\text{O}_6$  [ $\text{M} + \text{H}$ ] $^+$ : 283.1182, Found 283.1174; IR (KBr)  $\nu(\text{cm}^{-1})$ : 2954, 1776, 1739, 1437, 1267, 1070, 945, 768, 650, 550.

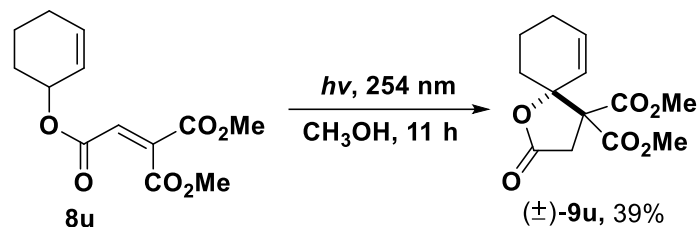

**Dimethyl 2-oxo-1-oxaspiro[4.5]dec-6-ene-4,4-dicarboxylate (±)-9u:** To a quartz Schlenk tube (15 mL) was added **8u** (26.8 mg, 0.1 mmol) and  $\text{CH}_3\text{OH}$  (10 mL). The Schlenk tube was refilled with  $\text{N}_2$ , and then the reaction mixture was exposed to ultraviolet light (254 nm). The reaction was monitored by TLC. When the starting material was completely consumed, the solvent was removed under reduced pressure, and the residue was purified by column chromatography on silica gel (petroleum ether/ethyl acetate = 20/1) to give product (±)-**9u** (10.5 mg, 39% yield). Colorless oil;  $^1\text{H}$  NMR (600 MHz,  $\text{CDCl}_3$ )  $\delta$  6.16- 6.08 (m, 1H), 5.51 (d,  $J = 10.0$  Hz, 1H), 3.80 (s, 3H), 3.76 (s, 3H), 3.26 (d,  $J = 17.7$  Hz, 1H), 2.98 (d,  $J = 17.7$  Hz, 1H), 2.16 – 2.11 (m, 2H), 2.04 – 1.98 (m, 2H), 1.80 – 1.75 (m, 2H);  $^{13}\text{C}$  NMR (150 MHz,  $\text{CDCl}_3$ )  $\delta$  172.2, 168.5, 167.3, 135.7, 123.1, 83.9, 63.5, 53.2, 53.1, 36.3, 30.4, 24.3, 18.8; HRMS(EI) Calcd for  $\text{C}_{13}\text{H}_{17}\text{O}_6$  [ $\text{M} + \text{H}$ ] $^+$ : 269.1025, Found 269.1018 ; IR (KBr)  $\nu(\text{cm}^{-1})$ : 2956, 1739, 1437, 1265, 1068, 945, 756.

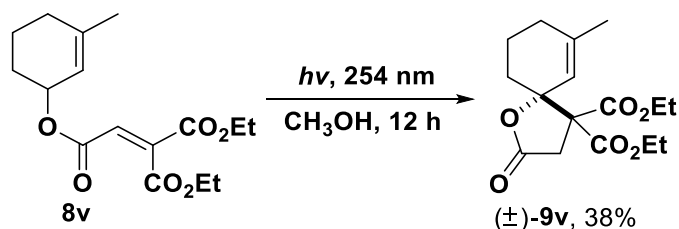

**Diethyl 7-methyl-2-oxo-1-oxaspiro[4.5]dec-6-ene-4,4-dicarboxylate (±)-9v:** To a quartz Schlenk tube (15 mL) was added **8v** (31.0 mg, 0.1 mmol) and  $\text{CH}_3\text{OH}$  (10 mL). The Schlenk tube was refilled with  $\text{N}_2$ , and then the reaction mixture was exposed to

ultraviolet light (254 nm). The reaction was monitored by TLC. When the starting material was completely consumed, the solvent was removed under reduced pressure, and the residue was purified by column chromatography on silica gel (petroleum ether/ethyl acetate = 20/1) to give product ( $\pm$ )-**9v** (11.8 mg, 38% yield). Colorless oil;  $^1\text{H}$  NMR (600 MHz,  $\text{CDCl}_3$ )  $\delta$  5.25 (s, 1H), 4.29-4.22 (m, 3H), 4.20 – 4.14 (m, 1H), 3.29 (d,  $J = 18.5$  Hz, 1H), 2.93 (d,  $J = 17.7$  Hz, 1H), 2.10 – 2.02 (m, 2H), 1.98 – 1.91 (m, 2H), 1.81 – 1.79 (m, 2H), 1.72 (s, 3H), 1.29 (td,  $J = 7.6$  and 0.8 Hz, 3H), 1.23 (td,  $J = 7.5$  and 0.8 Hz, 3H);  $^{13}\text{C}$  NMR (150 MHz,  $\text{CDCl}_3$ )  $\delta$  172.6, 168.2, 167.1, 144.2, 118.0, 85.1, 63.6, 62.5, 62.0, 36.5, 30.0, 29.5, 23.9, 19.3, 13.94, 13.92; HRMS(EI) Calcd for  $\text{C}_{16}\text{H}_{22}\text{O}_6$  [ $\text{M}^+$ ]: 310.1416, Found 310.1409; IR (KBr)  $\nu(\text{cm}^{-1})$  : 2937, 1790, 1736, 1444, 1370, 1303, 1258, 1233, 1172, 932, 906, 858.

#### X-ray data of ( $\pm$ )-**9f'** (CCDC 1911404)

Crystal data for mo\_( $\pm$ )-**9f'**:  $\text{C}_{16}\text{H}_{13}\text{F}_3\text{O}_2$ ,  $M = 296.28$ ,  $a = 10.5914(10)$  Å,  $b = 16.4477(16)$  Å,  $c = 7.9363(8)$  Å,  $\alpha = 90^\circ$ ,  $\beta = 96.959(2)^\circ$ ,  $\gamma = 90^\circ$ ,  $V = 1372.4(2)$  Å<sup>3</sup>,  $T = 100(2)$  K, space group  $P21/c$ ,  $Z = 4$ ,  $\mu(\text{MoK}\alpha) = 0.120$  mm<sup>-1</sup>, 15271 reflections measured, 4091 independent reflections ( $R_{int} = 0.0359$ ). The final  $R_I$  values were 0.0452 ( $I > 2\sigma(I)$ ). The final  $wR(F^2)$  values were 0.1209 ( $I > 2\sigma(I)$ ). The final  $R_I$  values were 0.0654 (all data). The final  $wR(F^2)$  values were 0.1335 (all data). The goodness of fit on  $F^2$  was 1.049.

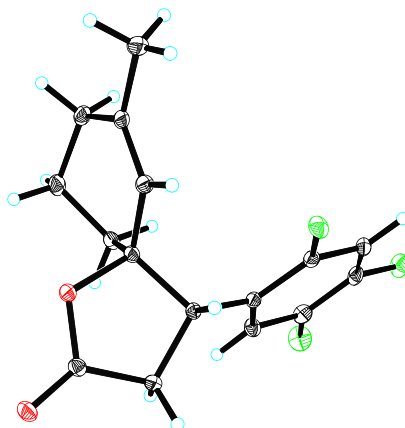

View of a molecule of ( $\pm$ )-**9f'** with the atom-labelling scheme.  
 Displacement ellipsoids are drawn at the 30% probability level.+

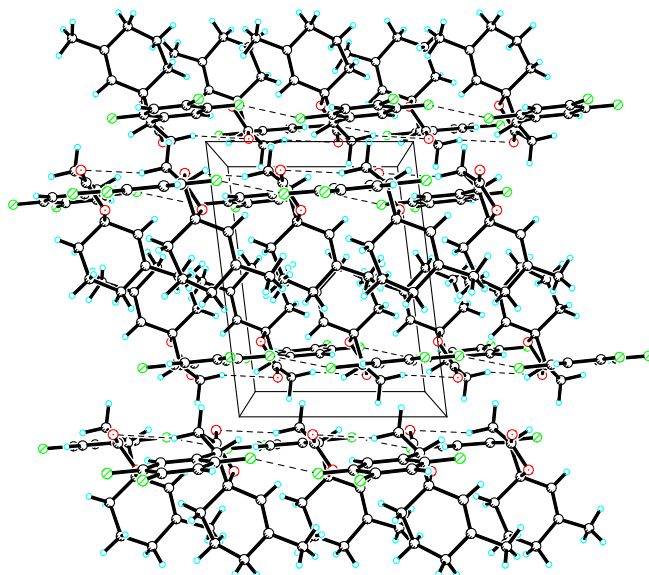

View of the pack drawing of ( $\pm$ )-**9f'**.  
 Hydrogen-bonds are shown as dashed lines.

Table 1. Crystal data and structure refinement for mo\_ $(\pm)$ -**9f'**\_0m.

|                                 |                                                               |                             |
|---------------------------------|---------------------------------------------------------------|-----------------------------|
| Identification code             | mo_ $(\pm)$ - <b>9f'</b> _0m                                  |                             |
| Empirical formula               | C <sub>16</sub> H <sub>15</sub> F <sub>3</sub> O <sub>2</sub> |                             |
| Formula weight                  | 296.28                                                        |                             |
| Temperature                     | 100(2) K                                                      |                             |
| Wavelength                      | 0.71073 Å                                                     |                             |
| Crystal system                  | Monoclinic                                                    |                             |
| Space group                     | P2 <sub>1</sub> /c                                            |                             |
| Unit cell dimensions            | a = 10.5914(10) Å                                             | $\alpha = 90^\circ$ .       |
|                                 | b = 16.4477(16) Å                                             | $\beta = 96.959(2)^\circ$ . |
|                                 | c = 7.9363(8) Å                                               | $\gamma = 90^\circ$ .       |
| Volume                          | 1372.4(2) Å <sup>3</sup>                                      |                             |
| Z                               | 4                                                             |                             |
| Density (calculated)            | 1.434 Mg/m <sup>3</sup>                                       |                             |
| Absorption coefficient          | 0.120 mm <sup>-1</sup>                                        |                             |
| F(000)                          | 616                                                           |                             |
| Crystal size                    | 0.300 x 0.220 x 0.150 mm <sup>3</sup>                         |                             |
| Theta range for data collection | 1.937 to 30.986°.                                             |                             |

|                                   |                                             |
|-----------------------------------|---------------------------------------------|
| Index ranges                      | -15<=h<=14, -22<=k<=23, -11<=l<=11          |
| Reflections collected             | 15271                                       |
| Independent reflections           | 4091 [R(int) = 0.0359]                      |
| Completeness to theta = 25.242°   | 99.7 %                                      |
| Absorption correction             | Semi-empirical from equivalents             |
| Refinement method                 | Full-matrix least-squares on F <sup>2</sup> |
| Data / restraints / parameters    | 4091 / 0 / 191                              |
| Goodness-of-fit on F <sup>2</sup> | 1.049                                       |
| Final R indices [I>2sigma(I)]     | R1 = 0.0452, wR2 = 0.1209                   |
| R indices (all data)              | R1 = 0.0654, wR2 = 0.1335                   |
| Extinction coefficient            | n/a                                         |
| Largest diff. peak and hole       | 0.390 and -0.231 e.Å <sup>-3</sup>          |

Table 2. Atomic coordinates ( $\times 10^4$ ) and equivalent isotropic displacement parameters ( $\text{\AA}^2 \times 10^3$ ) for mo\_(-)-9f'\_0m. U(eq) is defined as one third of the trace of the orthogonalized  $U^{ij}$  tensor.

|       | x       | y        | z        | U(eq) |
|-------|---------|----------|----------|-------|
| F(1)  | 8020(1) | 12041(1) | 5435(1)  | 34(1) |
| F(2)  | 8052(1) | 10703(1) | 3489(1)  | 38(1) |
| F(3)  | 8557(1) | 10418(1) | 10335(1) | 25(1) |
| O(1)  | 7655(1) | 7674(1)  | 9131(1)  | 21(1) |
| O(2)  | 9123(1) | 6826(1)  | 8366(1)  | 25(1) |
| C(1)  | 8155(1) | 11305(1) | 6188(2)  | 23(1) |
| C(2)  | 8291(1) | 11244(1) | 7924(2)  | 22(1) |
| C(3)  | 8418(1) | 10473(1) | 8618(2)  | 18(1) |
| C(4)  | 8423(1) | 9763(1)  | 7672(2)  | 16(1) |
| C(5)  | 8545(1) | 8946(1)  | 8555(2)  | 16(1) |
| C(6)  | 7259(1) | 8539(1)  | 8848(2)  | 17(1) |
| C(7)  | 6771(1) | 8823(1)  | 10440(2) | 20(1) |
| C(8)  | 5532(1) | 8875(1)  | 10622(2) | 21(1) |
| C(9)  | 4506(1) | 8643(1)  | 9228(2)  | 26(1) |
| C(10) | 8165(1) | 10618(1) | 5191(2)  | 24(1) |
| C(11) | 8303(1) | 9851(1)  | 5908(2)  | 21(1) |
| C(12) | 8708(1) | 7508(1)  | 8383(2)  | 19(1) |
| C(13) | 9217(1) | 8277(1)  | 7679(2)  | 19(1) |
| C(14) | 6235(1) | 8548(1)  | 7322(2)  | 21(1) |
| C(15) | 5011(1) | 8167(1)  | 7797(2)  | 27(1) |
| C(16) | 5104(2) | 9186(1)  | 12241(2) | 29(1) |

Table 3. Bond lengths [Å] and angles [°] for mo\_(±)-9f'\_0m.

---

|             |            |
|-------------|------------|
| F(1)-C(1)   | 1.3506(15) |
| F(2)-C(10)  | 1.3487(16) |
| F(3)-C(3)   | 1.3560(15) |
| O(1)-C(12)  | 1.3525(16) |
| O(1)-C(6)   | 1.4923(15) |
| O(2)-C(12)  | 1.2054(16) |
| C(1)-C(2)   | 1.372(2)   |
| C(1)-C(10)  | 1.381(2)   |
| C(2)-C(3)   | 1.3829(18) |
| C(2)-H(2)   | 0.9500     |
| C(3)-C(4)   | 1.3887(17) |
| C(4)-C(11)  | 1.3983(17) |
| C(4)-C(5)   | 1.5124(17) |
| C(5)-C(13)  | 1.5246(17) |
| C(5)-C(6)   | 1.5604(18) |
| C(5)-H(3)   | 1.0000     |
| C(6)-C(7)   | 1.4964(18) |
| C(6)-C(14)  | 1.5243(19) |
| C(7)-C(8)   | 1.3402(19) |
| C(7)-H(6)   | 0.9500     |
| C(8)-C(9)   | 1.503(2)   |
| C(8)-C(16)  | 1.503(2)   |
| C(9)-C(15)  | 1.528(2)   |
| C(9)-H(1)   | 0.9900     |
| C(9)-H(10)  | 0.9900     |
| C(10)-C(11) | 1.3832(19) |
| C(11)-H(15) | 0.9500     |
| C(12)-C(13) | 1.5077(19) |
| C(13)-H(5)  | 0.9900     |
| C(13)-H(4)  | 0.9900     |
| C(14)-C(15) | 1.528(2)   |
| C(14)-H(14) | 0.9900     |
| C(14)-H(13) | 0.9900     |
| C(15)-H(11) | 0.9900     |
| C(15)-H(12) | 0.9900     |
| C(16)-H(7)  | 0.9800     |

|                 |            |
|-----------------|------------|
| C(16)-H(8)      | 0.9800     |
| C(16)-H(9)      | 0.9800     |
| C(12)-O(1)-C(6) | 111.00(10) |
| F(1)-C(1)-C(2)  | 120.16(13) |
| F(1)-C(1)-C(10) | 119.23(13) |
| C(2)-C(1)-C(10) | 120.61(12) |
| C(1)-C(2)-C(3)  | 117.37(12) |
| C(1)-C(2)-H(2)  | 121.3      |
| C(3)-C(2)-H(2)  | 121.3      |
| F(3)-C(3)-C(2)  | 117.06(11) |
| F(3)-C(3)-C(4)  | 118.67(11) |
| C(2)-C(3)-C(4)  | 124.27(12) |
| C(3)-C(4)-C(11) | 116.60(11) |
| C(3)-C(4)-C(5)  | 120.13(11) |
| C(11)-C(4)-C(5) | 123.27(11) |
| C(4)-C(5)-C(13) | 116.66(11) |
| C(4)-C(5)-C(6)  | 115.05(10) |
| C(13)-C(5)-C(6) | 102.83(10) |
| C(4)-C(5)-H(3)  | 107.2      |
| C(13)-C(5)-H(3) | 107.2      |
| C(6)-C(5)-H(3)  | 107.2      |
| O(1)-C(6)-C(7)  | 106.83(10) |
| O(1)-C(6)-C(14) | 106.76(10) |
| C(7)-C(6)-C(14) | 112.53(11) |
| O(1)-C(6)-C(5)  | 101.35(9)  |
| C(7)-C(6)-C(5)  | 112.89(11) |
| C(14)-C(6)-C(5) | 115.28(11) |
| C(8)-C(7)-C(6)  | 123.61(13) |
| C(8)-C(7)-H(6)  | 118.2      |
| C(6)-C(7)-H(6)  | 118.2      |
| C(7)-C(8)-C(9)  | 122.31(13) |
| C(7)-C(8)-C(16) | 120.99(14) |
| C(9)-C(8)-C(16) | 116.69(13) |
| C(8)-C(9)-C(15) | 112.97(12) |
| C(8)-C(9)-H(1)  | 109.0      |
| C(15)-C(9)-H(1) | 109.0      |
| C(8)-C(9)-H(10) | 109.0      |

|                   |            |
|-------------------|------------|
| C(15)-C(9)-H(10)  | 109.0      |
| H(1)-C(9)-H(10)   | 107.8      |
| F(2)-C(10)-C(1)   | 118.89(12) |
| F(2)-C(10)-C(11)  | 119.90(13) |
| C(1)-C(10)-C(11)  | 121.20(12) |
| C(10)-C(11)-C(4)  | 119.94(12) |
| C(10)-C(11)-H(15) | 120.0      |
| C(4)-C(11)-H(15)  | 120.0      |
| O(2)-C(12)-O(1)   | 120.94(12) |
| O(2)-C(12)-C(13)  | 128.91(13) |
| O(1)-C(12)-C(13)  | 110.14(11) |
| C(12)-C(13)-C(5)  | 103.23(10) |
| C(12)-C(13)-H(5)  | 111.1      |
| C(5)-C(13)-H(5)   | 111.1      |
| C(12)-C(13)-H(4)  | 111.1      |
| C(5)-C(13)-H(4)   | 111.1      |
| H(5)-C(13)-H(4)   | 109.1      |
| C(6)-C(14)-C(15)  | 110.08(11) |
| C(6)-C(14)-H(14)  | 109.6      |
| C(15)-C(14)-H(14) | 109.6      |
| C(6)-C(14)-H(13)  | 109.6      |
| C(15)-C(14)-H(13) | 109.6      |
| H(14)-C(14)-H(13) | 108.2      |
| C(9)-C(15)-C(14)  | 110.96(11) |
| C(9)-C(15)-H(11)  | 109.4      |
| C(14)-C(15)-H(11) | 109.4      |
| C(9)-C(15)-H(12)  | 109.4      |
| C(14)-C(15)-H(12) | 109.4      |
| H(11)-C(15)-H(12) | 108.0      |
| C(8)-C(16)-H(7)   | 109.5      |
| C(8)-C(16)-H(8)   | 109.5      |
| H(7)-C(16)-H(8)   | 109.5      |
| C(8)-C(16)-H(9)   | 109.5      |
| H(7)-C(16)-H(9)   | 109.5      |
| H(8)-C(16)-H(9)   | 109.5      |

---

Symmetry transformations used to generate equivalent atoms:



Table 4. Anisotropic displacement parameters ( $\text{\AA}^2 \times 10^3$ ) for mo\_(±)-9f'\_0m. The anisotropic displacement factor exponent takes the form:  $-2\pi^2 [ h^2 a^{*2} U^{11} + \dots + 2 h k a^* b^* U^{12} ]$

|       | U <sup>11</sup> | U <sup>22</sup> | U <sup>33</sup> | U <sup>23</sup> | U <sup>13</sup> | U <sup>12</sup> |
|-------|-----------------|-----------------|-----------------|-----------------|-----------------|-----------------|
| F(1)  | 35(1)           | 20(1)           | 45(1)           | 14(1)           | 1(1)            | -1(1)           |
| F(2)  | 53(1)           | 40(1)           | 20(1)           | 10(1)           | 2(1)            | 0(1)            |
| F(3)  | 33(1)           | 24(1)           | 18(1)           | -5(1)           | 3(1)            | -3(1)           |
| O(1)  | 18(1)           | 15(1)           | 29(1)           | 3(1)            | 5(1)            | 2(1)            |
| O(2)  | 24(1)           | 18(1)           | 32(1)           | 1(1)            | 2(1)            | 5(1)            |
| C(1)  | 19(1)           | 16(1)           | 34(1)           | 8(1)            | 2(1)            | -1(1)           |
| C(2)  | 20(1)           | 16(1)           | 30(1)           | -2(1)           | 3(1)            | -2(1)           |
| C(3)  | 16(1)           | 19(1)           | 19(1)           | -1(1)           | 2(1)            | -2(1)           |
| C(4)  | 15(1)           | 15(1)           | 18(1)           | 1(1)            | 2(1)            | -1(1)           |
| C(5)  | 15(1)           | 14(1)           | 18(1)           | 0(1)            | 2(1)            | 0(1)            |
| C(6)  | 16(1)           | 13(1)           | 23(1)           | 1(1)            | 2(1)            | 2(1)            |
| C(7)  | 19(1)           | 18(1)           | 22(1)           | 2(1)            | 3(1)            | 1(1)            |
| C(8)  | 20(1)           | 13(1)           | 31(1)           | 4(1)            | 6(1)            | 1(1)            |
| C(9)  | 16(1)           | 21(1)           | 42(1)           | 2(1)            | 4(1)            | -2(1)           |
| C(10) | 25(1)           | 28(1)           | 19(1)           | 6(1)            | 3(1)            | -1(1)           |
| C(11) | 25(1)           | 20(1)           | 18(1)           | -1(1)           | 2(1)            | -2(1)           |
| C(12) | 17(1)           | 18(1)           | 20(1)           | -1(1)           | -1(1)           | 2(1)            |
| C(13) | 18(1)           | 17(1)           | 23(1)           | 0(1)            | 5(1)            | 2(1)            |
| C(14) | 19(1)           | 17(1)           | 24(1)           | -4(1)           | -1(1)           | 2(1)            |
| C(15) | 19(1)           | 21(1)           | 39(1)           | -4(1)           | -2(1)           | -3(1)           |
| C(16) | 28(1)           | 24(1)           | 38(1)           | 1(1)            | 14(1)           | 3(1)            |

Table 5. Hydrogen coordinates ( $\times 10^4$ ) and isotropic displacement parameters ( $\text{\AA}^2 \times 10^{-3}$ ) for  $\text{mo}_-(\pm)\text{-9f}_0\text{m}$ .

|       | x     | y     | z     | U(eq) |
|-------|-------|-------|-------|-------|
| H(2)  | 8298  | 11714 | 8623  | 27    |
| H(3)  | 9037  | 9035  | 9696  | 19    |
| H(6)  | 7373  | 8973  | 11374 | 24    |
| H(1)  | 4080  | 9143  | 8752  | 31    |
| H(10) | 3862  | 8309  | 9714  | 31    |
| H(15) | 8317  | 9386  | 5202  | 26    |
| H(5)  | 9004  | 8304  | 6431  | 23    |
| H(4)  | 10152 | 8314  | 7964  | 23    |
| H(14) | 6534  | 8239  | 6375  | 25    |
| H(13) | 6068  | 9114  | 6938  | 25    |
| H(11) | 4361  | 8162  | 6790  | 32    |
| H(12) | 5178  | 7598  | 8162  | 32    |
| H(7)  | 5846  | 9355  | 13020 | 43    |
| H(8)  | 4650  | 8754  | 12769 | 43    |
| H(9)  | 4535  | 9652  | 11989 | 43    |

Table 6. Torsion angles [°] for mo\_(±)-9f'\_0m.

---

|                       |             |
|-----------------------|-------------|
| F(1)-C(1)-C(2)-C(3)   | 179.69(12)  |
| C(10)-C(1)-C(2)-C(3)  | -0.9(2)     |
| C(1)-C(2)-C(3)-F(3)   | 179.79(12)  |
| C(1)-C(2)-C(3)-C(4)   | 0.3(2)      |
| F(3)-C(3)-C(4)-C(11)  | -178.73(11) |
| C(2)-C(3)-C(4)-C(11)  | 0.7(2)      |
| F(3)-C(3)-C(4)-C(5)   | 1.64(19)    |
| C(2)-C(3)-C(4)-C(5)   | -178.90(13) |
| C(3)-C(4)-C(5)-C(13)  | -148.82(13) |
| C(11)-C(4)-C(5)-C(13) | 31.57(18)   |
| C(3)-C(4)-C(5)-C(6)   | 90.58(15)   |
| C(11)-C(4)-C(5)-C(6)  | -89.02(15)  |
| C(12)-O(1)-C(6)-C(7)  | -143.33(11) |
| C(12)-O(1)-C(6)-C(14) | 96.06(12)   |
| C(12)-O(1)-C(6)-C(5)  | -24.96(13)  |
| C(4)-C(5)-C(6)-O(1)   | 160.81(10)  |
| C(13)-C(5)-C(6)-O(1)  | 32.90(12)   |
| C(4)-C(5)-C(6)-C(7)   | -85.27(13)  |
| C(13)-C(5)-C(6)-C(7)  | 146.82(11)  |
| C(4)-C(5)-C(6)-C(14)  | 45.97(15)   |
| C(13)-C(5)-C(6)-C(14) | -81.94(13)  |
| O(1)-C(6)-C(7)-C(8)   | -100.60(14) |
| C(14)-C(6)-C(7)-C(8)  | 16.26(18)   |
| C(5)-C(6)-C(7)-C(8)   | 148.86(13)  |
| C(6)-C(7)-C(8)-C(9)   | 0.6(2)      |
| C(6)-C(7)-C(8)-C(16)  | -178.36(12) |
| C(7)-C(8)-C(9)-C(15)  | 13.43(19)   |
| C(16)-C(8)-C(9)-C(15) | -167.54(12) |
| F(1)-C(1)-C(10)-F(2)  | 0.6(2)      |
| C(2)-C(1)-C(10)-F(2)  | -178.76(13) |
| F(1)-C(1)-C(10)-C(11) | 179.85(13)  |
| C(2)-C(1)-C(10)-C(11) | 0.5(2)      |
| F(2)-C(10)-C(11)-C(4) | 179.87(13)  |
| C(1)-C(10)-C(11)-C(4) | 0.6(2)      |
| C(3)-C(4)-C(11)-C(10) | -1.2(2)     |
| C(5)-C(4)-C(11)-C(10) | 178.42(13)  |

|                       |             |
|-----------------------|-------------|
| C(6)-O(1)-C(12)-O(2)  | -174.67(12) |
| C(6)-O(1)-C(12)-C(13) | 6.38(14)    |
| O(2)-C(12)-C(13)-C(5) | -163.22(14) |
| O(1)-C(12)-C(13)-C(5) | 15.63(14)   |
| C(4)-C(5)-C(13)-C(12) | -156.63(11) |
| C(6)-C(5)-C(13)-C(12) | -29.74(13)  |
| O(1)-C(6)-C(14)-C(15) | 70.89(13)   |
| C(7)-C(6)-C(14)-C(15) | -46.00(14)  |
| C(5)-C(6)-C(14)-C(15) | -177.42(11) |
| C(8)-C(9)-C(15)-C(14) | -43.69(17)  |
| C(6)-C(14)-C(15)-C(9) | 60.68(15)   |

---

Symmetry transformations used to generate equivalent atoms:

Table 7. Hydrogen bonds for mo\_(±)-**9f'**\_0m [Å and °].

| D-H...A             | d(D-H) | d(H...A) | d(D...A)   | <(DHA) |
|---------------------|--------|----------|------------|--------|
| C(13)-H(5)...O(2)#1 | 0.99   | 2.46     | 3.4169(17) | 162.2  |
| C(7)-H(6)...O(2)#2  | 0.95   | 2.64     | 3.3665(18) | 133.9  |
| C(2)-H(2)...F(1)#3  | 0.95   | 2.54     | 3.4848(16) | 173.0  |
| C(13)-H(5)...O(2)#1 | 0.99   | 2.46     | 3.4169(17) | 162.2  |
| C(7)-H(6)...O(2)#2  | 0.95   | 2.64     | 3.3665(18) | 133.9  |
| C(2)-H(2)...F(1)#3  | 0.95   | 2.54     | 3.4848(16) | 173.0  |
| C(2)-H(2)...F(1)#3  | 0.95   | 2.54     | 3.4848(16) | 173.0  |
| C(7)-H(6)...O(2)#2  | 0.95   | 2.64     | 3.3665(18) | 133.9  |
| C(13)-H(5)...O(2)#1 | 0.99   | 2.46     | 3.4169(17) | 162.2  |
| C(2)-H(2)...F(1)#3  | 0.95   | 2.54     | 3.4848(16) | 173.0  |
| C(7)-H(6)...O(2)#2  | 0.95   | 2.64     | 3.3665(18) | 133.9  |
| C(13)-H(5)...O(2)#1 | 0.99   | 2.46     | 3.4169(17) | 162.2  |
| C(2)-H(2)...F(1)#3  | 0.95   | 2.54     | 3.4848(16) | 173.0  |
| C(7)-H(6)...O(2)#2  | 0.95   | 2.64     | 3.3665(18) | 133.9  |
| C(13)-H(5)...O(2)#1 | 0.99   | 2.46     | 3.4169(17) | 162.2  |

Symmetry transformations used to generate equivalent atoms:

#1  $x, -y+3/2, z-1/2$     #2  $x, -y+3/2, z+1/2$     #3  $x, -y+5/2, z+1/2$

X-ray data of ( $\pm$ )-**9j'** (CCDC 1911403)

Original name: **\_mo\_9j'\_0m-data\_mo\_bwsx1094\_0m\_a\_file002**

Crystal data for mo\_bwsx1094\_0m\_a: C<sub>17</sub>H<sub>17</sub>NO<sub>2</sub>,  $M = 267.31$ ,  $a = 13.9466(16)$  Å,  $b = 23.367(3)$  Å,  $c = 8.8425(10)$  Å,  $\alpha = 90^\circ$ ,  $\beta = 90^\circ$ ,  $\gamma = 90^\circ$ ,  $V = 2881.7(6)$  Å<sup>3</sup>,  $T = 100(2)$  K, space group *Pba2*,  $Z = 8$ ,  $\mu(\text{MoK}\alpha) = 0.081$  mm<sup>-1</sup>, 31450 reflections measured, 8481 independent reflections ( $R_{int} = 0.0361$ ). The final  $R_I$  values were 0.0406 ( $I > 2\sigma(I)$ ). The final  $wR(F^2)$  values were 0.0968 ( $I > 2\sigma(I)$ ). The final  $R_I$  values were 0.0528 (all data). The final  $wR(F^2)$  values were 0.1036 (all data). The goodness of fit on  $F^2$  was 1.016. Flack parameter = 0.2(4).

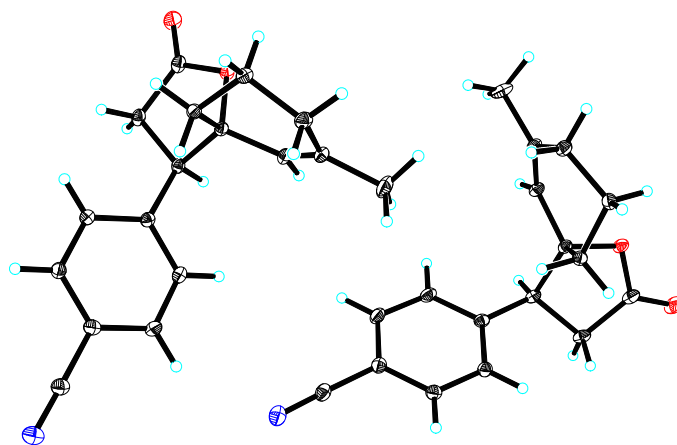

View of the molecules in an asymmetric unit.

Displacement ellipsoids are drawn at the 30% probability level.

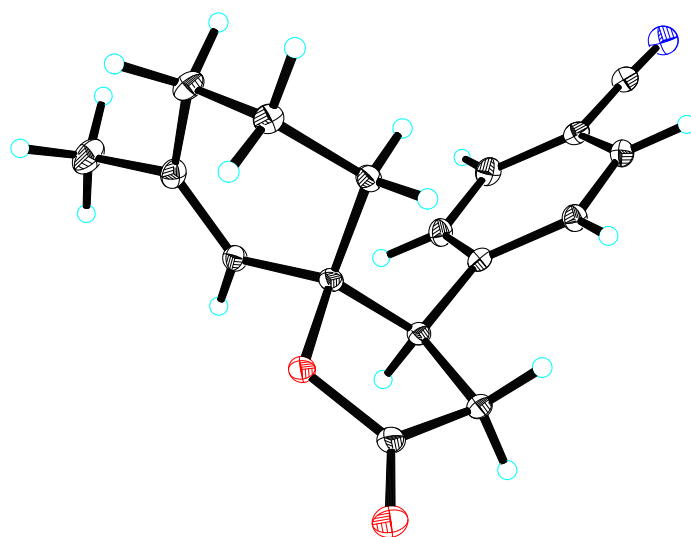

View of a molecule of (±)-**9j'** with the atom-labelling scheme.  
 Displacement ellipsoids are drawn at the 30% probability level.

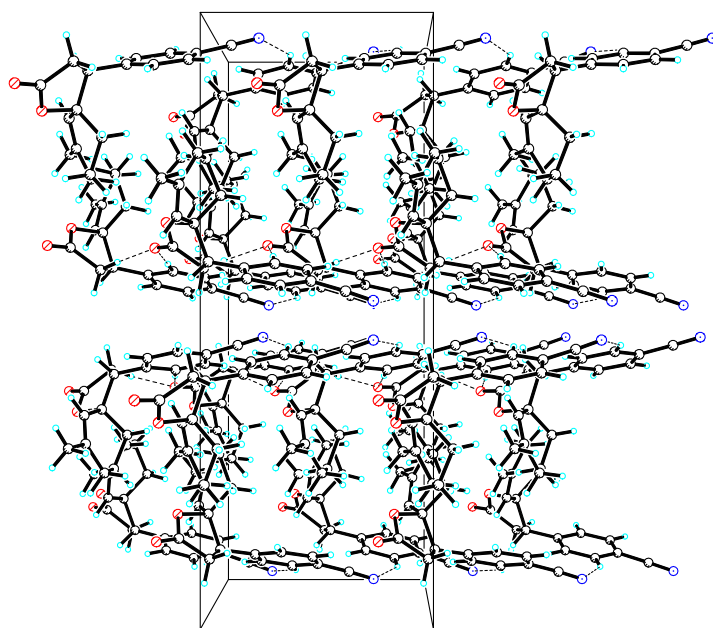

View of the pack drawing of (±)-**9j'**  
 Hydrogen-bonds are shown as dashed lines.

Table 1. Crystal data and structure refinement for (±)-**9j'** (mo\_bwsx1094\_0m\_a.)

|                     |                  |
|---------------------|------------------|
| Identification code | mo_bwsx1094_0m_a |
|---------------------|------------------|

|                                   |                                             |          |
|-----------------------------------|---------------------------------------------|----------|
| Empirical formula                 | C17 H17 N O2                                |          |
| Formula weight                    | 267.31                                      |          |
| Temperature                       | 100(2) K                                    |          |
| Wavelength                        | 0.71073 Å                                   |          |
| Crystal system                    | Orthorhombic                                |          |
| Space group                       | Pba2                                        |          |
| Unit cell dimensions              | a = 13.9466(16) Å                           | α = 90°. |
|                                   | b = 23.367(3) Å                             | β = 90°. |
|                                   | c = 8.8425(10) Å                            | γ = 90°. |
| Volume                            | 2881.7(6) Å <sup>3</sup>                    |          |
| Z                                 | 8                                           |          |
| Density (calculated)              | 1.232 Mg/m <sup>3</sup>                     |          |
| Absorption coefficient            | 0.081 mm <sup>-1</sup>                      |          |
| F(000)                            | 1136                                        |          |
| Crystal size                      | 1.800 x 0.320 x 0.100 mm <sup>3</sup>       |          |
| Theta range for data collection   | 1.700 to 31.054°.                           |          |
| Index ranges                      | -19 ≤ h ≤ 19, -31 ≤ k ≤ 33, -12 ≤ l ≤ 12    |          |
| Reflections collected             | 31450                                       |          |
| Independent reflections           | 8481 [R(int) = 0.0361]                      |          |
| Completeness to theta = 25.242°   | 99.9 %                                      |          |
| Absorption correction             | Semi-empirical from equivalents             |          |
| Refinement method                 | Full-matrix least-squares on F <sup>2</sup> |          |
| Data / restraints / parameters    | 8481 / 1 / 363                              |          |
| Goodness-of-fit on F <sup>2</sup> | 1.016                                       |          |
| Final R indices [I > 2σ(I)]       | R1 = 0.0406, wR2 = 0.0968                   |          |
| R indices (all data)              | R1 = 0.0528, wR2 = 0.1036                   |          |
| Absolute structure parameter      | 0.2(4)                                      |          |
| Extinction coefficient            | n/a                                         |          |
| Largest diff. peak and hole       | 0.274 and -0.208 e.Å <sup>-3</sup>          |          |



Table 2. Atomic coordinates ( $\times 10^4$ ) and equivalent isotropic displacement parameters ( $\text{\AA}^2 \times 10^3$ )

for  $(\pm)\text{-9j}^{\text{a}}$  (mo\_bwsx1094\_0m\_a). U (eq) is defined as one third of the trace of the orthogonalized  $U^{\text{ij}}$  tensor.

|        | x        | y       | z        | U(eq) |
|--------|----------|---------|----------|-------|
| O(001) | 4460(1)  | 6630(1) | 3362(1)  | 20(1) |
| O(002) | 10938(1) | 6621(1) | -1618(1) | 22(1) |
| O(003) | 3042(1)  | 6292(1) | 2627(2)  | 31(1) |
| O(004) | 12314(1) | 6232(1) | -2360(2) | 35(1) |
| N(005) | 8818(1)  | 5319(1) | 7421(2)  | 30(1) |
| N(006) | 6514(1)  | 5283(1) | 12368(2) | 31(1) |
| C(007) | 4642(1)  | 5874(1) | 8064(2)  | 20(1) |
| C(008) | 9410(1)  | 5638(1) | 4774(2)  | 21(1) |
| C(009) | 6120(1)  | 6645(1) | 4098(2)  | 19(1) |
| C(00A) | 5237(1)  | 5820(1) | 6798(2)  | 17(1) |
| C(00B) | 5928(1)  | 5585(1) | 9703(2)  | 20(1) |
| C(00C) | 9276(1)  | 6674(1) | -889(2)  | 19(1) |
| C(00D) | 6633(1)  | 7123(1) | 4287(2)  | 21(1) |
| C(00E) | 4981(1)  | 5761(1) | 9504(2)  | 20(1) |
| C(00F) | 10455(1) | 5968(1) | 280(2)   | 18(1) |
| C(00G) | 10691(1) | 5941(1) | 3140(2)  | 20(1) |
| C(00H) | 10110(1) | 5860(1) | 1868(2)  | 18(1) |
| C(00I) | 9073(1)  | 5472(1) | 6251(2)  | 24(1) |
| C(00J) | 11520(1) | 5880(1) | -75(2)   | 22(1) |
| C(00K) | 4904(1)  | 5948(1) | 5210(2)  | 17(1) |
| C(00L) | 3834(1)  | 5886(1) | 4855(2)  | 20(1) |

|        |          |         |          |       |
|--------|----------|---------|----------|-------|
| C(00M) | 10271(1) | 6589(1) | -302(2)  | 18(1) |
| C(00N) | 10346(1) | 5835(1) | 4582(2)  | 21(1) |
| C(00O) | 5121(1)  | 6571(1) | 4678(2)  | 16(1) |
| C(00P) | 6262(1)  | 5423(1) | 11184(2) | 23(1) |
| C(00Q) | 3700(1)  | 6274(1) | 3508(2)  | 22(1) |
| C(00R) | 10563(1) | 7057(1) | 808(2)   | 18(1) |
| C(00S) | 11666(1) | 6246(1) | -1456(2) | 24(1) |
| C(00T) | 8814(1)  | 5562(1) | 3519(2)  | 24(1) |
| C(00U) | 8784(1)  | 7159(1) | -727(2)  | 21(1) |
| C(00V) | 6538(1)  | 5533(1) | 8458(2)  | 24(1) |
| C(00W) | 5149(1)  | 7621(1) | 5248(2)  | 20(1) |
| C(00X) | 10285(1) | 7646(1) | 201(2)   | 21(1) |
| C(00Y) | 6188(1)  | 5650(1) | 7022(2)  | 22(1) |
| C(00Z) | 4852(1)  | 7032(1) | 5820(2)  | 18(1) |
| C(010) | 9168(1)  | 5675(1) | 2088(2)  | 24(1) |
| C(011) | 9199(1)  | 7680(1) | 10(2)    | 23(1) |
| C(012) | 6235(1)  | 7644(1) | 5055(2)  | 23(1) |
| C(013) | 7656(1)  | 7166(1) | 3754(3)  | 33(1) |
| C(014) | 7765(1)  | 7211(1) | -1260(3) | 34(1) |

---

Table 3. Bond lengths [ $\text{\AA}$ ] and angles [ $^\circ$ ] for ( $\pm$ )-**9j'** (mo\_bwsx1094\_0m\_a).

---

|               |          |
|---------------|----------|
| O(001)-C(00Q) | 1.354(2) |
| O(001)-C(00O) | 1.491(2) |
| O(002)-C(00S) | 1.348(2) |
| O(002)-C(00M) | 1.491(2) |
| O(003)-C(00Q) | 1.204(2) |
| O(004)-C(00S) | 1.208(2) |
| N(005)-C(00I) | 1.151(3) |
| N(006)-C(00P) | 1.152(3) |
| C(007)-C(00E) | 1.383(2) |
| C(007)-C(00A) | 1.399(2) |
| C(007)-H(007) | 0.9500   |
| C(008)-C(00N) | 1.394(3) |
| C(008)-C(00T) | 1.398(3) |
| C(008)-C(00I) | 1.442(3) |
| C(009)-C(00D) | 1.337(2) |
| C(009)-C(00O) | 1.494(2) |
| C(009)-H(009) | 0.9500   |
| C(00A)-C(00Y) | 1.398(2) |
| C(00A)-C(00K) | 1.509(2) |
| C(00B)-C(00E) | 1.394(2) |
| C(00B)-C(00V) | 1.397(3) |
| C(00B)-C(00P) | 1.441(3) |
| C(00C)-C(00U) | 1.333(2) |
| C(00C)-C(00M) | 1.495(2) |
| C(00C)-H(00C) | 0.9500   |
| C(00D)-C(012) | 1.501(3) |
| C(00D)-C(013) | 1.505(3) |

|               |          |
|---------------|----------|
| C(00E)-H(00E) | 0.9500   |
| C(00F)-C(00H) | 1.506(2) |
| C(00F)-C(00J) | 1.532(2) |
| C(00F)-C(00M) | 1.560(2) |
| C(00F)-H(00F) | 1.0000   |
| C(00G)-C(00N) | 1.386(3) |
| C(00G)-C(00H) | 1.399(2) |
| C(00G)-H(00G) | 0.9500   |
| C(00H)-C(010) | 1.397(3) |
| C(00J)-C(00S) | 1.505(3) |
| C(00J)-H(00A) | 0.9900   |
| C(00J)-H(00B) | 0.9900   |
| C(00K)-C(00L) | 1.532(2) |
| C(00K)-C(00O) | 1.558(2) |
| C(00K)-H(00K) | 1.0000   |
| C(00L)-C(00Q) | 1.509(3) |
| C(00L)-H(00D) | 0.9900   |
| C(00L)-H(00H) | 0.9900   |
| C(00M)-C(00R) | 1.526(2) |
| C(00N)-H(00N) | 0.9500   |
| C(00O)-C(00Z) | 1.524(2) |
| C(00R)-C(00X) | 1.527(2) |
| C(00R)-H(00J) | 0.9900   |
| C(00R)-H(00L) | 0.9900   |
| C(00T)-C(010) | 1.384(3) |
| C(00T)-H(00T) | 0.9500   |
| C(00U)-C(011) | 1.497(3) |
| C(00U)-C(014) | 1.501(3) |
| C(00V)-C(00Y) | 1.387(3) |

|                      |            |
|----------------------|------------|
| C(00V)-H(00V)        | 0.9500     |
| C(00W)-C(00Z)        | 1.524(2)   |
| C(00W)-C(012)        | 1.525(3)   |
| C(00W)-H(00M)        | 0.9900     |
| C(00W)-H(00O)        | 0.9900     |
| C(00X)-C(011)        | 1.526(3)   |
| C(00X)-H(00Q)        | 0.9900     |
| C(00X)-H(00R)        | 0.9900     |
| C(00Y)-H(00Y)        | 0.9500     |
| C(00Z)-H(00S)        | 0.9900     |
| C(00Z)-H(00U)        | 0.9900     |
| C(010)-H(010)        | 0.9500     |
| C(011)-H(01A)        | 0.9900     |
| C(011)-H(01B)        | 0.9900     |
| C(012)-H(01C)        | 0.9900     |
| C(012)-H(01D)        | 0.9900     |
| C(013)-H(01E)        | 0.9800     |
| C(013)-H(01F)        | 0.9800     |
| C(013)-H(01G)        | 0.9800     |
| C(014)-H(01H)        | 0.9800     |
| C(014)-H(01I)        | 0.9800     |
| C(014)-H(01J)        | 0.9800     |
| C(00Q)-O(001)-C(00O) | 110.70(13) |
| C(00S)-O(002)-C(00M) | 110.71(13) |
| C(00E)-C(007)-C(00A) | 121.10(16) |
| C(00E)-C(007)-H(007) | 119.5      |
| C(00A)-C(007)-H(007) | 119.5      |
| C(00N)-C(008)-C(00T) | 120.16(17) |

|                      |            |
|----------------------|------------|
| C(00N)-C(008)-C(00I) | 120.29(17) |
| C(00T)-C(008)-C(00I) | 119.39(16) |
| C(00D)-C(009)-C(00O) | 123.59(16) |
| C(00D)-C(009)-H(009) | 118.2      |
| C(00O)-C(009)-H(009) | 118.2      |
| C(00Y)-C(00A)-C(007) | 118.36(16) |
| C(00Y)-C(00A)-C(00K) | 118.70(16) |
| C(007)-C(00A)-C(00K) | 122.93(15) |
| C(00E)-C(00B)-C(00V) | 120.22(16) |
| C(00E)-C(00B)-C(00P) | 119.90(17) |
| C(00V)-C(00B)-C(00P) | 119.76(16) |
| C(00U)-C(00C)-C(00M) | 123.75(16) |
| C(00U)-C(00C)-H(00C) | 118.1      |
| C(00M)-C(00C)-H(00C) | 118.1      |
| C(009)-C(00D)-C(012) | 122.39(16) |
| C(009)-C(00D)-C(013) | 121.60(17) |
| C(012)-C(00D)-C(013) | 116.01(16) |
| C(007)-C(00E)-C(00B) | 119.73(17) |
| C(007)-C(00E)-H(00E) | 120.1      |
| C(00B)-C(00E)-H(00E) | 120.1      |
| C(00H)-C(00F)-C(00J) | 118.59(15) |
| C(00H)-C(00F)-C(00M) | 114.27(14) |
| C(00J)-C(00F)-C(00M) | 102.47(14) |
| C(00H)-C(00F)-H(00F) | 106.9      |
| C(00J)-C(00F)-H(00F) | 106.9      |
| C(00M)-C(00F)-H(00F) | 106.9      |
| C(00N)-C(00G)-C(00H) | 120.91(16) |
| C(00N)-C(00G)-H(00G) | 119.5      |
| C(00H)-C(00G)-H(00G) | 119.5      |

|                      |            |
|----------------------|------------|
| C(010)-C(00H)-C(00G) | 118.39(17) |
| C(010)-C(00H)-C(00F) | 118.83(16) |
| C(00G)-C(00H)-C(00F) | 122.78(15) |
| N(005)-C(00I)-C(008) | 177.5(2)   |
| C(00S)-C(00J)-C(00F) | 102.75(14) |
| C(00S)-C(00J)-H(00A) | 111.2      |
| C(00F)-C(00J)-H(00A) | 111.2      |
| C(00S)-C(00J)-H(00B) | 111.2      |
| C(00F)-C(00J)-H(00B) | 111.2      |
| H(00A)-C(00J)-H(00B) | 109.1      |
| C(00A)-C(00K)-C(00L) | 118.16(14) |
| C(00A)-C(00K)-C(00O) | 113.95(13) |
| C(00L)-C(00K)-C(00O) | 102.49(13) |
| C(00A)-C(00K)-H(00K) | 107.2      |
| C(00L)-C(00K)-H(00K) | 107.2      |
| C(00O)-C(00K)-H(00K) | 107.2      |
| C(00Q)-C(00L)-C(00K) | 103.05(14) |
| C(00Q)-C(00L)-H(00D) | 111.2      |
| C(00K)-C(00L)-H(00D) | 111.2      |
| C(00Q)-C(00L)-H(00H) | 111.2      |
| C(00K)-C(00L)-H(00H) | 111.2      |
| H(00D)-C(00L)-H(00H) | 109.1      |
| O(002)-C(00M)-C(00C) | 107.48(14) |
| O(002)-C(00M)-C(00R) | 107.38(13) |
| C(00C)-C(00M)-C(00R) | 112.02(14) |
| O(002)-C(00M)-C(00F) | 101.68(12) |
| C(00C)-C(00M)-C(00F) | 113.08(14) |
| C(00R)-C(00M)-C(00F) | 114.28(14) |
| C(00G)-C(00N)-C(008) | 119.78(17) |

|                      |            |
|----------------------|------------|
| C(00G)-C(00N)-H(00N) | 120.1      |
| C(008)-C(00N)-H(00N) | 120.1      |
| O(001)-C(00O)-C(009) | 107.31(14) |
| O(001)-C(00O)-C(00Z) | 107.37(13) |
| C(009)-C(00O)-C(00Z) | 112.03(13) |
| O(001)-C(00O)-C(00K) | 101.65(12) |
| C(009)-C(00O)-C(00K) | 113.15(14) |
| C(00Z)-C(00O)-C(00K) | 114.37(14) |
| N(006)-C(00P)-C(00B) | 178.4(2)   |
| O(003)-C(00Q)-O(001) | 120.93(17) |
| O(003)-C(00Q)-C(00L) | 128.80(16) |
| O(001)-C(00Q)-C(00L) | 110.27(14) |
| C(00M)-C(00R)-C(00X) | 110.63(14) |
| C(00M)-C(00R)-H(00J) | 109.5      |
| C(00X)-C(00R)-H(00J) | 109.5      |
| C(00M)-C(00R)-H(00L) | 109.5      |
| C(00X)-C(00R)-H(00L) | 109.5      |
| H(00J)-C(00R)-H(00L) | 108.1      |
| O(004)-C(00S)-O(002) | 120.78(18) |
| O(004)-C(00S)-C(00J) | 128.50(17) |
| O(002)-C(00S)-C(00J) | 110.72(15) |
| C(010)-C(00T)-C(008) | 119.27(16) |
| C(010)-C(00T)-H(00T) | 120.4      |
| C(008)-C(00T)-H(00T) | 120.4      |
| C(00C)-C(00U)-C(011) | 122.54(16) |
| C(00C)-C(00U)-C(014) | 121.55(18) |
| C(011)-C(00U)-C(014) | 115.91(16) |
| C(00Y)-C(00V)-C(00B) | 119.34(16) |
| C(00Y)-C(00V)-H(00V) | 120.3      |



|                      |            |
|----------------------|------------|
| C(00B)-C(00V)-H(00V) | 120.3      |
| C(00Z)-C(00W)-C(012) | 109.84(14) |
| C(00Z)-C(00W)-H(00M) | 109.7      |
| C(012)-C(00W)-H(00M) | 109.7      |
| C(00Z)-C(00W)-H(00O) | 109.7      |
| C(012)-C(00W)-H(00O) | 109.7      |
| H(00M)-C(00W)-H(00O) | 108.2      |
| C(011)-C(00X)-C(00R) | 109.78(14) |
| C(011)-C(00X)-H(00Q) | 109.7      |
| C(00R)-C(00X)-H(00Q) | 109.7      |
| C(011)-C(00X)-H(00R) | 109.7      |
| C(00R)-C(00X)-H(00R) | 109.7      |
| H(00Q)-C(00X)-H(00R) | 108.2      |
| C(00V)-C(00Y)-C(00A) | 121.24(17) |
| C(00V)-C(00Y)-H(00Y) | 119.4      |
| C(00A)-C(00Y)-H(00Y) | 119.4      |
| C(00W)-C(00Z)-C(00O) | 110.63(14) |
| C(00W)-C(00Z)-H(00S) | 109.5      |
| C(00O)-C(00Z)-H(00S) | 109.5      |
| C(00W)-C(00Z)-H(00U) | 109.5      |
| C(00O)-C(00Z)-H(00U) | 109.5      |
| H(00S)-C(00Z)-H(00U) | 108.1      |
| C(00T)-C(010)-C(00H) | 121.47(17) |
| C(00T)-C(010)-H(010) | 119.3      |
| C(00H)-C(010)-H(010) | 119.3      |
| C(00U)-C(011)-C(00X) | 112.96(15) |
| C(00U)-C(011)-H(01A) | 109.0      |
| C(00X)-C(011)-H(01A) | 109.0      |
| C(00U)-C(011)-H(01B) | 109.0      |

|                      |            |
|----------------------|------------|
| C(00X)-C(011)-H(01B) | 109.0      |
| H(01A)-C(011)-H(01B) | 107.8      |
| C(00D)-C(012)-C(00W) | 112.97(15) |
| C(00D)-C(012)-H(01C) | 109.0      |
| C(00W)-C(012)-H(01C) | 109.0      |
| C(00D)-C(012)-H(01D) | 109.0      |
| C(00W)-C(012)-H(01D) | 109.0      |
| H(01C)-C(012)-H(01D) | 107.8      |
| C(00D)-C(013)-H(01E) | 109.5      |
| C(00D)-C(013)-H(01F) | 109.5      |
| H(01E)-C(013)-H(01F) | 109.5      |
| C(00D)-C(013)-H(01G) | 109.5      |
| H(01E)-C(013)-H(01G) | 109.5      |
| H(01F)-C(013)-H(01G) | 109.5      |
| C(00U)-C(014)-H(01H) | 109.5      |
| C(00U)-C(014)-H(01I) | 109.5      |
| H(01H)-C(014)-H(01I) | 109.5      |
| C(00U)-C(014)-H(01J) | 109.5      |
| H(01H)-C(014)-H(01J) | 109.5      |
| H(01I)-C(014)-H(01J) | 109.5      |

---

Symmetry transformations used to generate equivalent atoms:

Table 4. Anisotropic displacement parameters ( $\text{\AA}^2 \times 10^3$ ) for  $(\pm)\text{-9j}'$  (mo\_bwsx1094\_0m\_a).

The anisotropic

displacement factor exponent takes the form:  $-2\pi^2 [ h^2 a^{*2} U^{11} + \dots + 2 h k a^* b^* U^{12} ]$

|        | $U^{11}$ | $U^{22}$ | $U^{33}$ | $U^{23}$ | $U^{13}$ | $U^{12}$ |
|--------|----------|----------|----------|----------|----------|----------|
| O(001) | 16(1)    | 29(1)    | 16(1)    | 1(1)     | -3(1)    | -5(1)    |
| O(002) | 16(1)    | 34(1)    | 16(1)    | 0(1)     | 2(1)     | 5(1)     |
| O(003) | 22(1)    | 47(1)    | 26(1)    | 2(1)     | -8(1)    | -9(1)    |
| O(004) | 21(1)    | 58(1)    | 26(1)    | -2(1)    | 6(1)     | 11(1)    |
| N(005) | 26(1)    | 31(1)    | 33(1)    | 0(1)     | 5(1)     | -1(1)    |
| N(006) | 32(1)    | 30(1)    | 30(1)    | 3(1)     | -5(1)    | 2(1)     |
| C(007) | 17(1)    | 22(1)    | 20(1)    | 1(1)     | 1(1)     | 1(1)     |
| C(008) | 19(1)    | 16(1)    | 26(1)    | 0(1)     | 3(1)     | 2(1)     |
| C(009) | 14(1)    | 23(1)    | 18(1)    | -2(1)    | 2(1)     | -1(1)    |
| C(00A) | 16(1)    | 16(1)    | 21(1)    | 0(1)     | -1(1)    | -2(1)    |
| C(00B) | 21(1)    | 17(1)    | 23(1)    | 1(1)     | -4(1)    | -2(1)    |
| C(00C) | 14(1)    | 26(1)    | 18(1)    | -3(1)    | -2(1)    | 1(1)     |
| C(00D) | 13(1)    | 25(1)    | 23(1)    | 2(1)     | 0(1)     | -1(1)    |
| C(00E) | 19(1)    | 21(1)    | 21(1)    | 1(1)     | 2(1)     | 0(1)     |
| C(00F) | 14(1)    | 20(1)    | 20(1)    | -5(1)    | -3(1)    | 2(1)     |
| C(00G) | 18(1)    | 19(1)    | 23(1)    | 1(1)     | -2(1)    | -2(1)    |
| C(00H) | 18(1)    | 16(1)    | 22(1)    | -1(1)    | -2(1)    | 2(1)     |
| C(00I) | 19(1)    | 20(1)    | 31(1)    | -1(1)    | 4(1)     | 1(1)     |
| C(00J) | 18(1)    | 28(1)    | 20(1)    | -5(1)    | -3(1)    | 7(1)     |
| C(00K) | 15(1)    | 19(1)    | 16(1)    | -2(1)    | 1(1)     | -2(1)    |
| C(00L) | 15(1)    | 27(1)    | 19(1)    | -2(1)    | 0(1)     | -6(1)    |
| C(00M) | 14(1)    | 24(1)    | 15(1)    | -2(1)    | 0(1)     | 2(1)     |
| C(00N) | 21(1)    | 18(1)    | 23(1)    | 1(1)     | -3(1)    | -1(1)    |

|              |       |       |       |       |       |
|--------------|-------|-------|-------|-------|-------|
| C(00O) 13(1) | 22(1) | 14(1) | -1(1) | -2(1) | -1(1) |
| C(00P) 23(1) | 21(1) | 25(1) | 1(1)  | -3(1) | 0(1)  |
| C(00Q) 18(1) | 28(1) | 18(1) | -4(1) | 0(1)  | -4(1) |
| C(00R) 18(1) | 22(1) | 16(1) | 0(1)  | -1(1) | -1(1) |
| C(00S) 17(1) | 35(1) | 19(1) | -6(1) | -2(1) | 5(1)  |
| C(00T) 15(1) | 26(1) | 32(1) | 1(1)  | 0(1)  | -2(1) |
| C(00U) 14(1) | 28(1) | 22(1) | 1(1)  | 0(1)  | 2(1)  |
| C(00V) 16(1) | 27(1) | 28(1) | 3(1)  | -2(1) | 2(1)  |
| C(00W) 17(1) | 20(1) | 23(1) | 0(1)  | -1(1) | 1(1)  |
| C(00X) 21(1) | 21(1) | 20(1) | 1(1)  | 1(1)  | -2(1) |
| C(00Y) 17(1) | 26(1) | 24(1) | 1(1)  | 3(1)  | 1(1)  |
| C(00Z) 16(1) | 22(1) | 15(1) | 0(1)  | 0(1)  | 1(1)  |
| C(010) 16(1) | 25(1) | 29(1) | 0(1)  | -6(1) | -2(1) |
| C(011) 18(1) | 23(1) | 28(1) | 1(1)  | 3(1)  | 3(1)  |
| C(012) 18(1) | 20(1) | 30(1) | 1(1)  | -4(1) | -3(1) |
| C(013) 17(1) | 33(1) | 48(1) | -1(1) | 6(1)  | -6(1) |
| C(014) 18(1) | 39(1) | 46(1) | -3(1) | -9(1) | 9(1)  |

---

Table 5. Hydrogen coordinates ( $\times 10^4$ ) and isotropic displacement parameters ( $\text{\AA}^2 \times 10^{-3}$ ) for ( $\pm$ )-**9j**' (mo\_bwsx1094\_0m\_a).

|        | x     | y    | z     | U(eq) |
|--------|-------|------|-------|-------|
| H(007) | 3995  | 5990 | 7933  | 23    |
| H(009) | 6405  | 6335 | 3566  | 22    |
| H(00C) | 8979  | 6366 | -1408 | 23    |
| H(00E) | 4570  | 5804 | 10353 | 24    |
| H(00F) | 10088 | 5704 | -397  | 22    |
| H(00G) | 11332 | 6070 | 3013  | 24    |
| H(00A) | 11929 | 6011 | 773   | 27    |
| H(00B) | 11662 | 5473 | -292  | 27    |
| H(00K) | 5257  | 5684 | 4517  | 20    |
| H(00D) | 3670  | 5485 | 4602  | 24    |
| H(00H) | 3435  | 6012 | 5720  | 24    |
| H(00N) | 10745 | 5897 | 5437  | 25    |
| H(00J) | 11265 | 7043 | 973   | 22    |
| H(00L) | 10244 | 6992 | 1793  | 22    |
| H(00T) | 8172  | 5433 | 3647  | 29    |
| H(00V) | 7185  | 5418 | 8593  | 28    |
| H(00M) | 4943  | 7918 | 5979  | 24    |
| H(00O) | 4833  | 7700 | 4268  | 24    |
| H(00Q) | 10502 | 7946 | 912   | 25    |
| H(00R) | 10602 | 7712 | -786  | 25    |
| H(00Y) | 6603  | 5614 | 6175  | 27    |

|        |      |      |       |    |
|--------|------|------|-------|----|
| H(00S) | 4150 | 7026 | 5991  | 21 |
| H(00U) | 5173 | 6953 | 6796  | 21 |
| H(010) | 8761 | 5625 | 1236  | 28 |
| H(01A) | 8900 | 7731 | 1016  | 27 |
| H(01B) | 9040 | 8020 | -609  | 27 |
| H(01C) | 6404 | 7987 | 4454  | 27 |
| H(01D) | 6537 | 7683 | 6062  | 27 |
| H(01E) | 7837 | 6810 | 3240  | 49 |
| H(01F) | 8078 | 7227 | 4625  | 49 |
| H(01G) | 7718 | 7488 | 3051  | 49 |
| H(01H) | 7574 | 6856 | -1768 | 51 |
| H(01I) | 7713 | 7532 | -1970 | 51 |
| H(01J) | 7345 | 7279 | -391  | 51 |

---

-

Table 6. Torsion angles [°] for ( $\pm$ )-**9j**' (mo\_bwsx1094\_0m\_a).

---

|                             |             |
|-----------------------------|-------------|
| C(00E)-C(007)-C(00A)-C(00Y) | -0.2(3)     |
| C(00E)-C(007)-C(00A)-C(00K) | -178.93(16) |
| C(00O)-C(009)-C(00D)-C(012) | -2.5(3)     |
| C(00O)-C(009)-C(00D)-C(013) | 176.67(18)  |
| C(00A)-C(007)-C(00E)-C(00B) | -0.6(3)     |
| C(00V)-C(00B)-C(00E)-C(007) | 1.2(3)      |
| C(00P)-C(00B)-C(00E)-C(007) | -175.00(16) |
| C(00N)-C(00G)-C(00H)-C(010) | 0.6(2)      |
| C(00N)-C(00G)-C(00H)-C(00F) | -179.87(16) |
| C(00J)-C(00F)-C(00H)-C(010) | -150.34(17) |
| C(00M)-C(00F)-C(00H)-C(010) | 88.64(19)   |
| C(00J)-C(00F)-C(00H)-C(00G) | 30.1(2)     |
| C(00M)-C(00F)-C(00H)-C(00G) | -90.90(19)  |
| C(00H)-C(00F)-C(00J)-C(00S) | -157.22(14) |
| C(00M)-C(00F)-C(00J)-C(00S) | -30.36(17)  |
| C(00Y)-C(00A)-C(00K)-C(00L) | 154.72(16)  |
| C(007)-C(00A)-C(00K)-C(00L) | -26.6(2)    |
| C(00Y)-C(00A)-C(00K)-C(00O) | -84.87(19)  |
| C(007)-C(00A)-C(00K)-C(00O) | 93.85(19)   |
| C(00A)-C(00K)-C(00L)-C(00Q) | 156.16(14)  |
| C(00O)-C(00K)-C(00L)-C(00Q) | 29.99(16)   |
| C(00S)-O(002)-C(00M)-C(00C) | -143.44(15) |
| C(00S)-O(002)-C(00M)-C(00R) | 95.87(16)   |
| C(00S)-O(002)-C(00M)-C(00F) | -24.44(17)  |
| C(00U)-C(00C)-C(00M)-O(002) | -104.3(2)   |
| C(00U)-C(00C)-C(00M)-C(00R) | 13.4(3)     |
| C(00U)-C(00C)-C(00M)-C(00F) | 144.33(18)  |

|                             |             |
|-----------------------------|-------------|
| C(00H)-C(00F)-C(00M)-O(002) | 162.68(13)  |
| C(00J)-C(00F)-C(00M)-O(002) | 33.09(15)   |
| C(00H)-C(00F)-C(00M)-C(00C) | -82.39(18)  |
| C(00J)-C(00F)-C(00M)-C(00C) | 148.02(15)  |
| C(00H)-C(00F)-C(00M)-C(00R) | 47.35(19)   |
| C(00J)-C(00F)-C(00M)-C(00R) | -82.24(16)  |
| C(00H)-C(00G)-C(00N)-C(008) | 0.8(3)      |
| C(00T)-C(008)-C(00N)-C(00G) | -1.7(3)     |
| C(00I)-C(008)-C(00N)-C(00G) | 173.71(16)  |
| C(00Q)-O(001)-C(00O)-C(009) | 144.71(14)  |
| C(00Q)-O(001)-C(00O)-C(00Z) | -94.68(15)  |
| C(00Q)-O(001)-C(00O)-C(00K) | 25.72(16)   |
| C(00D)-C(009)-C(00O)-O(001) | 103.56(19)  |
| C(00D)-C(009)-C(00O)-C(00Z) | -14.1(2)    |
| C(00D)-C(009)-C(00O)-C(00K) | -145.15(17) |
| C(00A)-C(00K)-C(00O)-O(001) | -162.39(13) |
| C(00L)-C(00K)-C(00O)-O(001) | -33.54(15)  |
| C(00A)-C(00K)-C(00O)-C(009) | 82.87(18)   |
| C(00L)-C(00K)-C(00O)-C(009) | -148.28(15) |
| C(00A)-C(00K)-C(00O)-C(00Z) | -47.05(19)  |
| C(00L)-C(00K)-C(00O)-C(00Z) | 81.81(16)   |
| C(00O)-O(001)-C(00Q)-O(003) | 173.65(16)  |
| C(00O)-O(001)-C(00Q)-C(00L) | -6.81(19)   |
| C(00K)-C(00L)-C(00Q)-O(003) | 163.95(19)  |
| C(00K)-C(00L)-C(00Q)-O(001) | -15.54(18)  |
| O(002)-C(00M)-C(00R)-C(00X) | 72.60(16)   |
| C(00C)-C(00M)-C(00R)-C(00X) | -45.2(2)    |
| C(00F)-C(00M)-C(00R)-C(00X) | -175.45(14) |
| C(00M)-O(002)-C(00S)-O(004) | -175.40(17) |



|                             |             |
|-----------------------------|-------------|
| C(00M)-O(002)-C(00S)-C(00J) | 5.20(19)    |
| C(00F)-C(00J)-C(00S)-O(004) | -162.55(19) |
| C(00F)-C(00J)-C(00S)-O(002) | 16.80(19)   |
| C(00N)-C(008)-C(00T)-C(010) | 1.0(3)      |
| C(00I)-C(008)-C(00T)-C(010) | -174.39(17) |
| C(00M)-C(00C)-C(00U)-C(011) | 2.8(3)      |
| C(00M)-C(00C)-C(00U)-C(014) | -176.40(18) |
| C(00E)-C(00B)-C(00V)-C(00Y) | -0.9(3)     |
| C(00P)-C(00B)-C(00V)-C(00Y) | 175.30(17)  |
| C(00M)-C(00R)-C(00X)-C(011) | 61.65(18)   |
| C(00B)-C(00V)-C(00Y)-C(00A) | 0.0(3)      |
| C(007)-C(00A)-C(00Y)-C(00V) | 0.5(3)      |
| C(00K)-C(00A)-C(00Y)-C(00V) | 179.28(16)  |
| C(012)-C(00W)-C(00Z)-C(00O) | -61.94(18)  |
| O(001)-C(00O)-C(00Z)-C(00W) | -71.78(16)  |
| C(009)-C(00O)-C(00Z)-C(00W) | 45.80(19)   |
| C(00K)-C(00O)-C(00Z)-C(00W) | 176.26(14)  |
| C(008)-C(00T)-C(010)-C(00H) | 0.4(3)      |
| C(00G)-C(00H)-C(010)-C(00T) | -1.2(3)     |
| C(00F)-C(00H)-C(010)-C(00T) | 179.20(16)  |
| C(00C)-C(00U)-C(011)-C(00X) | 13.6(3)     |
| C(014)-C(00U)-C(011)-C(00X) | -167.11(17) |
| C(00R)-C(00X)-C(011)-C(00U) | -45.0(2)    |
| C(009)-C(00D)-C(012)-C(00W) | -13.5(3)    |
| C(013)-C(00D)-C(012)-C(00W) | 167.29(17)  |
| C(00Z)-C(00W)-C(012)-C(00D) | 44.8(2)     |

---

Symmetry transformations used to generate equivalent atoms:

Table 7. Hydrogen bonds for ( $\pm$ )-**9j**' (mo\_bwsx1094\_0m\_a) [ $\text{\AA}$  and  $^\circ$ ].

| D-H...A                  | d(D-H) | d(H...A) | d(D...A) | $\angle$ (DHA) |
|--------------------------|--------|----------|----------|----------------|
| C(00L)-H(00H)...O(004)#1 | 0.99   | 2.36     | 3.348(2) | 172.1          |
| C(00L)-H(00D)...N(006)#2 | 0.99   | 2.68     | 3.540(2) | 145.3          |
| C(00J)-H(00A)...O(003)#3 | 0.99   | 2.35     | 3.337(2) | 173.8          |
| C(00C)-H(00C)...N(005)#4 | 0.95   | 2.67     | 3.561(2) | 157.0          |
| C(009)-H(009)...N(006)#4 | 0.95   | 2.68     | 3.574(3) | 156.5          |
| C(00L)-H(00H)...O(004)#1 | 0.99   | 2.36     | 3.348(2) | 172.1          |
| C(00L)-H(00D)...N(006)#2 | 0.99   | 2.68     | 3.540(2) | 145.3          |
| C(00J)-H(00A)...O(003)#3 | 0.99   | 2.35     | 3.337(2) | 173.8          |
| C(00C)-H(00C)...N(005)#4 | 0.95   | 2.67     | 3.561(2) | 157.0          |
| C(009)-H(009)...N(006)#4 | 0.95   | 2.68     | 3.574(3) | 156.5          |
| C(009)-H(009)...N(006)#4 | 0.95   | 2.68     | 3.574(3) | 156.5          |
| C(00C)-H(00C)...N(005)#4 | 0.95   | 2.67     | 3.561(2) | 157.0          |
| C(00J)-H(00A)...O(003)#3 | 0.99   | 2.35     | 3.337(2) | 173.8          |
| C(00L)-H(00D)...N(006)#2 | 0.99   | 2.68     | 3.540(2) | 145.3          |
| C(00L)-H(00H)...O(004)#1 | 0.99   | 2.36     | 3.348(2) | 172.1          |

Symmetry transformations used to generate equivalent atoms:

#1  $x-1, y, z+1$     #2  $-x+1, -y+1, z-1$     #3  $x+1, y, z$

#4  $x, y, z-1$

**X-ray data of 9j —CCDC2111150 (Original name: mo\_bwsx01093\_0m)**

Crystal data for mo\_bwsx01093\_0m:  $C_{17}H_{17}NO_2$ ,  $M = 267.31$ ,  $a = 9.5290(10)$  Å,  $b = 17.7336(19)$  Å,  $c = 8.6854(9)$  Å,  $\alpha = 90^\circ$ ,  $\beta = 108.621(2)^\circ$ ,  $\gamma = 90^\circ$ ,  $V = 1390.9(3)$  Å<sup>3</sup>,  $T = 100(2)$  K, space group  $P21/c$ ,  $Z = 4$ ,  $\mu(\text{MoK}\alpha) = 0.084$  mm<sup>-1</sup>, 15426 reflections measured, 4108 independent reflections ( $R_{int} = 0.0263$ ). The final  $R_I$  values were 0.0398 ( $I > 2\sigma(I)$ ). The final  $wR(F^2)$  values were 0.1016 ( $I > 2\sigma(I)$ ). The final  $R_I$  values were 0.0489 (all data). The final  $wR(F^2)$  values were 0.1082 (all data). The goodness of fit on  $F^2$  was 1.042.

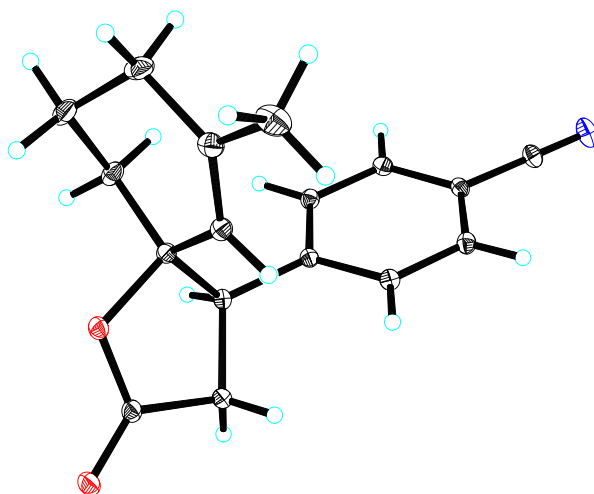

View of a molecule of **9j** (bwsx01093) with the atom-labelling scheme.

Displacement ellipsoids are drawn at the 30% probability level.

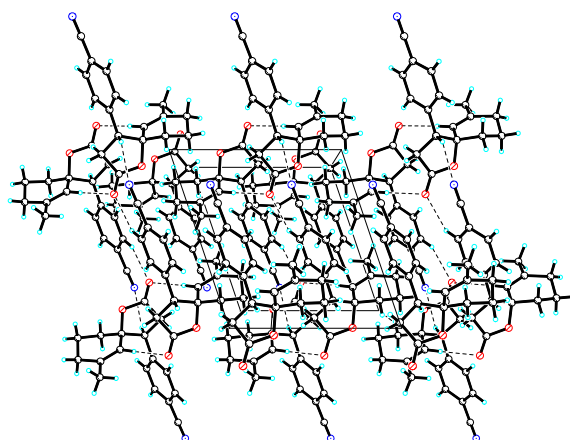

View of the pack drawing of **9j** (bwsx01093).

Hydrogen-bonds are shown as dashed lines.

Table 1. Crystal data and structure refinement for **9j** (mo\_bwsx01093\_0m).

|                                   |                                                  |                  |
|-----------------------------------|--------------------------------------------------|------------------|
| Identification code               | mo_bwsx01093_0m                                  |                  |
| Empirical formula                 | C <sub>17</sub> H <sub>17</sub> N O <sub>2</sub> |                  |
| Formula weight                    | 267.31                                           |                  |
| Temperature                       | 100(2) K                                         |                  |
| Wavelength                        | 0.71073 Å                                        |                  |
| Crystal system                    | Monoclinic                                       |                  |
| Space group                       | P2 <sub>1</sub> /c                               |                  |
| Unit cell dimensions              | a = 9.5290(10) Å                                 | α = 90°.         |
|                                   | b = 17.7336(19) Å                                | β = 108.621(2)°. |
|                                   | c = 8.6854(9) Å                                  | γ = 90°.         |
| Volume                            | 1390.9(3) Å <sup>3</sup>                         |                  |
| Z                                 | 4                                                |                  |
| Density (calculated)              | 1.277 Mg/m <sup>3</sup>                          |                  |
| Absorption coefficient            | 0.084 mm <sup>-1</sup>                           |                  |
| F(000)                            | 568                                              |                  |
| Crystal size                      | 0.870 x 0.350 x 0.260 mm <sup>3</sup>            |                  |
| Theta range for data collection   | 2.255 to 30.942°.                                |                  |
| Index ranges                      | -13 ≤ h ≤ 12, -25 ≤ k ≤ 24, -12 ≤ l ≤ 12         |                  |
| Reflections collected             | 15426                                            |                  |
| Independent reflections           | 4108 [R(int) = 0.0263]                           |                  |
| Completeness to theta = 25.242°   | 99.6 %                                           |                  |
| Absorption correction             | Semi-empirical from equivalents                  |                  |
| Refinement method                 | Full-matrix least-squares on F <sup>2</sup>      |                  |
| Data / restraints / parameters    | 4108 / 0 / 182                                   |                  |
| Goodness-of-fit on F <sup>2</sup> | 1.042                                            |                  |
| Final R indices [I > 2σ(I)]       | R1 = 0.0398, wR2 = 0.1016                        |                  |
| R indices (all data)              | R1 = 0.0489, wR2 = 0.1082                        |                  |
| Extinction coefficient            | n/a                                              |                  |
| Largest diff. peak and hole       | 0.391 and -0.237 e.Å <sup>-3</sup>               |                  |

Table 2. Atomic coordinates ( $\times 10^4$ ) and equivalent isotropic displacement parameters ( $\text{\AA}^2 \times 10^3$ ) for **9j** (mo\_bwsx01093\_0m).  $U(\text{eq})$  is defined as one third of the trace of the orthogonalized  $U^{ij}$  tensor.

|       | x        | y       | z        | U(eq) |
|-------|----------|---------|----------|-------|
| O(1)  | 10491(1) | 795(1)  | 7620(1)  | 18(1) |
| O(2)  | 12224(1) | 656(1)  | 10031(1) | 23(1) |
| N(1)  | 1776(1)  | 2509(1) | 8486(1)  | 29(1) |
| C(1)  | 7339(1)  | 393(1)  | 3686(1)  | 26(1) |
| C(2)  | 7297(1)  | 30(1)   | 5241(1)  | 21(1) |
| C(3)  | 8000(1)  | 328(1)  | 6697(1)  | 17(1) |
| C(4)  | 8910(1)  | 1033(1) | 6948(1)  | 15(1) |
| C(5)  | 8740(1)  | 1555(1) | 8322(1)  | 15(1) |
| C(6)  | 7168(1)  | 1695(1) | 8295(1)  | 14(1) |
| C(7)  | 6415(1)  | 1222(1) | 9062(1)  | 16(1) |
| C(8)  | 4998(1)  | 1399(1) | 9077(1)  | 17(1) |
| C(9)  | 4320(1)  | 2063(1) | 8330(1)  | 16(1) |
| C(10) | 2892(1)  | 2295(1) | 8411(1)  | 20(1) |
| C(11) | 6439(1)  | 2339(1) | 7498(1)  | 16(1) |
| C(12) | 5032(1)  | 2530(1) | 7517(1)  | 17(1) |
| C(13) | 10992(1) | 862(1)  | 9244(1)  | 17(1) |
| C(14) | 9814(1)  | 1202(1) | 9857(1)  | 17(1) |
| C(15) | 8646(1)  | 929(1)  | 3969(1)  | 25(1) |
| C(16) | 8736(1)  | 1460(1) | 5381(1)  | 21(1) |
| C(17) | 6438(1)  | -691(1) | 5089(2)  | 30(1) |

Table 3. Bond lengths [Å] and angles [°] for **9j** (mo\_bwsx01093\_0m).

---

|             |            |
|-------------|------------|
| O(1)-C(13)  | 1.3417(12) |
| O(1)-C(4)   | 1.4926(11) |
| O(2)-C(13)  | 1.2110(12) |
| N(1)-C(10)  | 1.1498(14) |
| C(1)-C(2)   | 1.5084(15) |
| C(1)-C(15)  | 1.5219(17) |
| C(1)-H(1)   | 0.9900     |
| C(1)-H(8)   | 0.9900     |
| C(2)-C(3)   | 1.3373(13) |
| C(2)-C(17)  | 1.5005(15) |
| C(3)-C(4)   | 1.4977(13) |
| C(3)-H(16)  | 0.9500     |
| C(4)-C(16)  | 1.5194(13) |
| C(4)-C(5)   | 1.5584(12) |
| C(5)-C(6)   | 1.5116(12) |
| C(5)-C(14)  | 1.5318(13) |
| C(5)-H(17)  | 1.0000     |
| C(6)-C(11)  | 1.3993(13) |
| C(6)-C(7)   | 1.4032(13) |
| C(7)-C(8)   | 1.3911(13) |
| C(7)-H(3)   | 0.9500     |
| C(8)-C(9)   | 1.3991(13) |
| C(8)-H(2)   | 0.9500     |
| C(9)-C(12)  | 1.3960(13) |
| C(9)-C(10)  | 1.4446(13) |
| C(11)-C(12) | 1.3878(13) |
| C(11)-H(5)  | 0.9500     |
| C(12)-H(4)  | 0.9500     |
| C(13)-C(14) | 1.5125(13) |
| C(14)-H(7)  | 0.9900     |
| C(14)-H(6)  | 0.9900     |
| C(15)-C(16) | 1.5272(14) |
| C(15)-H(9)  | 0.9900     |
| C(15)-H(10) | 0.9900     |
| C(16)-H(11) | 0.9900     |
| C(16)-H(12) | 0.9900     |

|                  |            |
|------------------|------------|
| C(17)-H(13)      | 0.9800     |
| C(17)-H(15)      | 0.9800     |
| C(17)-H(14)      | 0.9800     |
| C(13)-O(1)-C(4)  | 111.22(7)  |
| C(2)-C(1)-C(15)  | 112.13(9)  |
| C(2)-C(1)-H(1)   | 109.2      |
| C(15)-C(1)-H(1)  | 109.2      |
| C(2)-C(1)-H(8)   | 109.2      |
| C(15)-C(1)-H(8)  | 109.2      |
| H(1)-C(1)-H(8)   | 107.9      |
| C(3)-C(2)-C(17)  | 120.98(10) |
| C(3)-C(2)-C(1)   | 121.93(10) |
| C(17)-C(2)-C(1)  | 117.09(9)  |
| C(2)-C(3)-C(4)   | 124.07(9)  |
| C(2)-C(3)-H(16)  | 118.0      |
| C(4)-C(3)-H(16)  | 118.0      |
| O(1)-C(4)-C(3)   | 106.59(7)  |
| O(1)-C(4)-C(16)  | 107.45(7)  |
| C(3)-C(4)-C(16)  | 113.15(8)  |
| O(1)-C(4)-C(5)   | 101.97(7)  |
| C(3)-C(4)-C(5)   | 114.22(7)  |
| C(16)-C(4)-C(5)  | 112.41(7)  |
| C(6)-C(5)-C(14)  | 117.64(8)  |
| C(6)-C(5)-C(4)   | 115.48(7)  |
| C(14)-C(5)-C(4)  | 102.68(7)  |
| C(6)-C(5)-H(17)  | 106.8      |
| C(14)-C(5)-H(17) | 106.8      |
| C(4)-C(5)-H(17)  | 106.8      |
| C(11)-C(6)-C(7)  | 118.38(8)  |
| C(11)-C(6)-C(5)  | 118.30(8)  |
| C(7)-C(6)-C(5)   | 123.30(8)  |
| C(8)-C(7)-C(6)   | 120.89(8)  |
| C(8)-C(7)-H(3)   | 119.6      |
| C(6)-C(7)-H(3)   | 119.6      |
| C(7)-C(8)-C(9)   | 119.52(9)  |
| C(7)-C(8)-H(2)   | 120.2      |
| C(9)-C(8)-H(2)   | 120.2      |
| C(12)-C(9)-C(8)  | 120.38(8)  |

|                   |            |
|-------------------|------------|
| C(12)-C(9)-C(10)  | 118.33(9)  |
| C(8)-C(9)-C(10)   | 121.27(9)  |
| N(1)-C(10)-C(9)   | 177.20(11) |
| C(12)-C(11)-C(6)  | 121.43(9)  |
| C(12)-C(11)-H(5)  | 119.3      |
| C(6)-C(11)-H(5)   | 119.3      |
| C(11)-C(12)-C(9)  | 119.31(9)  |
| C(11)-C(12)-H(4)  | 120.3      |
| C(9)-C(12)-H(4)   | 120.3      |
| O(2)-C(13)-O(1)   | 121.46(9)  |
| O(2)-C(13)-C(14)  | 128.03(9)  |
| O(1)-C(13)-C(14)  | 110.50(8)  |
| C(13)-C(14)-C(5)  | 102.79(7)  |
| C(13)-C(14)-H(7)  | 111.2      |
| C(5)-C(14)-H(7)   | 111.2      |
| C(13)-C(14)-H(6)  | 111.2      |
| C(5)-C(14)-H(6)   | 111.2      |
| H(7)-C(14)-H(6)   | 109.1      |
| C(1)-C(15)-C(16)  | 110.38(8)  |
| C(1)-C(15)-H(9)   | 109.6      |
| C(16)-C(15)-H(9)  | 109.6      |
| C(1)-C(15)-H(10)  | 109.6      |
| C(16)-C(15)-H(10) | 109.6      |
| H(9)-C(15)-H(10)  | 108.1      |
| C(4)-C(16)-C(15)  | 111.94(8)  |
| C(4)-C(16)-H(11)  | 109.2      |
| C(15)-C(16)-H(11) | 109.2      |
| C(4)-C(16)-H(12)  | 109.2      |
| C(15)-C(16)-H(12) | 109.2      |
| H(11)-C(16)-H(12) | 107.9      |
| C(2)-C(17)-H(13)  | 109.5      |
| C(2)-C(17)-H(15)  | 109.5      |
| H(13)-C(17)-H(15) | 109.5      |
| C(2)-C(17)-H(14)  | 109.5      |
| H(13)-C(17)-H(14) | 109.5      |
| H(15)-C(17)-H(14) | 109.5      |

---

Symmetry transformations used to generate equivalent atoms:



Table 4. Anisotropic displacement parameters ( $\text{\AA}^2 \times 10^3$ ) for **9j** (mo\_bwsx01093\_0m). The anisotropic

displacement factor exponent takes the form:  $-2\pi^2 [ h^2 a^{*2} U^{11} + \dots + 2 h k a^* b^* U^{12} ]$

|       | U <sup>11</sup> | U <sup>22</sup> | U <sup>33</sup> | U <sup>23</sup> | U <sup>13</sup> | U <sup>12</sup> |
|-------|-----------------|-----------------|-----------------|-----------------|-----------------|-----------------|
| O(1)  | 16(1)           | 20(1)           | 20(1)           | 2(1)            | 8(1)            | 4(1)            |
| O(2)  | 16(1)           | 27(1)           | 27(1)           | 10(1)           | 7(1)            | 4(1)            |
| N(1)  | 19(1)           | 23(1)           | 46(1)           | 0(1)            | 13(1)           | 0(1)            |
| C(1)  | 29(1)           | 33(1)           | 16(1)           | -4(1)           | 5(1)            | 10(1)           |
| C(2)  | 19(1)           | 21(1)           | 21(1)           | -4(1)           | 5(1)            | 6(1)            |
| C(3)  | 18(1)           | 16(1)           | 17(1)           | 0(1)            | 6(1)            | 2(1)            |
| C(4)  | 16(1)           | 16(1)           | 15(1)           | 2(1)            | 6(1)            | 3(1)            |
| C(5)  | 14(1)           | 15(1)           | 16(1)           | -1(1)           | 6(1)            | 0(1)            |
| C(6)  | 14(1)           | 14(1)           | 14(1)           | -3(1)           | 5(1)            | -1(1)           |
| C(7)  | 16(1)           | 14(1)           | 18(1)           | 0(1)            | 6(1)            | 0(1)            |
| C(8)  | 17(1)           | 17(1)           | 19(1)           | -2(1)           | 7(1)            | -2(1)           |
| C(9)  | 13(1)           | 18(1)           | 17(1)           | -3(1)           | 4(1)            | -1(1)           |
| C(10) | 17(1)           | 18(1)           | 26(1)           | -1(1)           | 7(1)            | -2(1)           |
| C(11) | 17(1)           | 16(1)           | 17(1)           | -1(1)           | 6(1)            | -1(1)           |
| C(12) | 17(1)           | 16(1)           | 18(1)           | 0(1)            | 4(1)            | 1(1)            |
| C(13) | 16(1)           | 16(1)           | 20(1)           | 4(1)            | 7(1)            | 0(1)            |
| C(14) | 14(1)           | 21(1)           | 16(1)           | 0(1)            | 5(1)            | 1(1)            |
| C(15) | 32(1)           | 30(1)           | 17(1)           | 4(1)            | 13(1)           | 12(1)           |
| C(16) | 26(1)           | 21(1)           | 18(1)           | 5(1)            | 11(1)           | 7(1)            |
| C(17) | 27(1)           | 24(1)           | 32(1)           | -11(1)          | 3(1)            | -1(1)           |

Table 5. Hydrogen coordinates ( $\times 10^4$ ) and isotropic displacement parameters ( $\text{\AA}^2 \times 10^{-3}$ ) for **9j** (mo\_bwsx01093\_0m).

|       | x     | y     | z     | U(eq) |
|-------|-------|-------|-------|-------|
| H(1)  | 6407  | 675   | 3191  | 32    |
| H(8)  | 7405  | -4    | 2913  | 32    |
| H(16) | 7916  | 78    | 7631  | 20    |
| H(17) | 9162  | 2057  | 8178  | 18    |
| H(3)  | 6880  | 773   | 9579  | 19    |
| H(2)  | 4494  | 1072  | 9590  | 21    |
| H(5)  | 6918  | 2652  | 6931  | 20    |
| H(4)  | 4559  | 2973  | 6984  | 21    |
| H(7)  | 10239 | 1589  | 10699 | 21    |
| H(6)  | 9318  | 810   | 10309 | 21    |
| H(9)  | 8530  | 1227  | 2972  | 30    |
| H(10) | 9574  | 635   | 4214  | 30    |
| H(11) | 9588  | 1805  | 5545  | 25    |
| H(12) | 7825  | 1771  | 5107  | 25    |
| H(13) | 6400  | -842  | 6161  | 44    |
| H(15) | 6923  | -1087 | 4657  | 44    |
| H(14) | 5428  | -614  | 4351  | 44    |

Table 6. Torsion angles [°] for **9j** (mo\_bwsx01093\_0m).

---

|                        |             |
|------------------------|-------------|
| C(15)-C(1)-C(2)-C(3)   | 20.64(13)   |
| C(15)-C(1)-C(2)-C(17)  | -158.88(9)  |
| C(17)-C(2)-C(3)-C(4)   | 178.36(9)   |
| C(1)-C(2)-C(3)-C(4)    | -1.14(15)   |
| C(13)-O(1)-C(4)-C(3)   | -97.64(8)   |
| C(13)-O(1)-C(4)-C(16)  | 140.78(8)   |
| C(13)-O(1)-C(4)-C(5)   | 22.41(9)    |
| C(2)-C(3)-C(4)-O(1)    | -107.28(10) |
| C(2)-C(3)-C(4)-C(16)   | 10.61(13)   |
| C(2)-C(3)-C(4)-C(5)    | 140.93(9)   |
| O(1)-C(4)-C(5)-C(6)    | -160.99(7)  |
| C(3)-C(4)-C(5)-C(6)    | -46.44(11)  |
| C(16)-C(4)-C(5)-C(6)   | 84.24(10)   |
| O(1)-C(4)-C(5)-C(14)   | -31.64(8)   |
| C(3)-C(4)-C(5)-C(14)   | 82.90(9)    |
| C(16)-C(4)-C(5)-C(14)  | -146.42(8)  |
| C(14)-C(5)-C(6)-C(11)  | 144.18(9)   |
| C(4)-C(5)-C(6)-C(11)   | -94.22(10)  |
| C(14)-C(5)-C(6)-C(7)   | -34.21(12)  |
| C(4)-C(5)-C(6)-C(7)    | 87.40(11)   |
| C(11)-C(6)-C(7)-C(8)   | -2.02(13)   |
| C(5)-C(6)-C(7)-C(8)    | 176.37(8)   |
| C(6)-C(7)-C(8)-C(9)    | -0.64(14)   |
| C(7)-C(8)-C(9)-C(12)   | 2.59(14)    |
| C(7)-C(8)-C(9)-C(10)   | -175.76(9)  |
| C(7)-C(6)-C(11)-C(12)  | 2.82(13)    |
| C(5)-C(6)-C(11)-C(12)  | -175.64(8)  |
| C(6)-C(11)-C(12)-C(9)  | -0.94(14)   |
| C(8)-C(9)-C(12)-C(11)  | -1.81(14)   |
| C(10)-C(9)-C(12)-C(11) | 176.59(9)   |
| C(4)-O(1)-C(13)-O(2)   | 175.70(8)   |
| C(4)-O(1)-C(13)-C(14)  | -3.34(10)   |
| O(2)-C(13)-C(14)-C(5)  | 163.43(10)  |
| O(1)-C(13)-C(14)-C(5)  | -17.61(10)  |
| C(6)-C(5)-C(14)-C(13)  | 157.89(8)   |
| C(4)-C(5)-C(14)-C(13)  | 29.90(9)    |

|                       |            |
|-----------------------|------------|
| C(2)-C(1)-C(15)-C(16) | -48.52(11) |
| O(1)-C(4)-C(16)-C(15) | 78.13(10)  |
| C(3)-C(4)-C(16)-C(15) | -39.24(11) |
| C(5)-C(4)-C(16)-C(15) | -170.47(8) |
| C(1)-C(15)-C(16)-C(4) | 59.09(11)  |

---

Symmetry transformations used to generate equivalent atoms:

Table 7. Hydrogen bonds for **9j** (mo\_bwsx01093\_0m) [ $\text{\AA}$  and  $^\circ$ ].

| D-H...A             | d(D-H) | d(H...A) | d(D...A)   | $\angle(\text{DHA})$ |
|---------------------|--------|----------|------------|----------------------|
| C(5)-H(17)...N(1)#1 | 1.00   | 2.55     | 3.3143(13) | 133.3                |
| C(3)-H(16)...O(2)#2 | 0.95   | 2.45     | 3.3987(12) | 175.6                |
| C(5)-H(17)...N(1)#1 | 1.00   | 2.55     | 3.3143(13) | 133.3                |
| C(3)-H(16)...O(2)#2 | 0.95   | 2.45     | 3.3987(12) | 175.6                |
| C(5)-H(17)...N(1)#1 | 1.00   | 2.55     | 3.3143(13) | 133.3                |
| C(3)-H(16)...O(2)#2 | 0.95   | 2.45     | 3.3987(12) | 175.6                |
| C(5)-H(17)...N(1)#1 | 1.00   | 2.55     | 3.3143(13) | 133.3                |
| C(3)-H(16)...O(2)#2 | 0.95   | 2.45     | 3.3987(12) | 175.6                |
| C(3)-H(16)...O(2)#2 | 0.95   | 2.45     | 3.3987(12) | 175.6                |
| C(5)-H(17)...N(1)#1 | 1.00   | 2.55     | 3.3143(13) | 133.3                |
| C(3)-H(16)...O(2)#2 | 0.95   | 2.45     | 3.3987(12) | 175.6                |
| C(5)-H(17)...N(1)#1 | 1.00   | 2.55     | 3.3143(13) | 133.3                |
| C(3)-H(16)...O(2)#2 | 0.95   | 2.45     | 3.3987(12) | 175.6                |
| C(5)-H(17)...N(1)#1 | 1.00   | 2.55     | 3.3143(13) | 133.3                |
| C(3)-H(16)...O(2)#2 | 0.95   | 2.45     | 3.3987(12) | 175.6                |
| C(5)-H(17)...N(1)#1 | 1.00   | 2.55     | 3.3143(13) | 133.3                |
| C(3)-H(16)...O(2)#2 | 0.95   | 2.45     | 3.3987(12) | 175.6                |
| C(5)-H(17)...N(1)#1 | 1.00   | 2.55     | 3.3143(13) | 133.3                |
| C(3)-H(16)...O(2)#2 | 0.95   | 2.45     | 3.3987(12) | 175.6                |
| C(5)-H(17)...N(1)#1 | 1.00   | 2.55     | 3.3143(13) | 133.3                |

Symmetry transformations used to generate equivalent atoms:

#1  $x+1, y, z$  #2  $-x+2, -y, -z+2$

<sup>1</sup>H NMR of **8p1** (400 M, CDCl<sub>3</sub>)

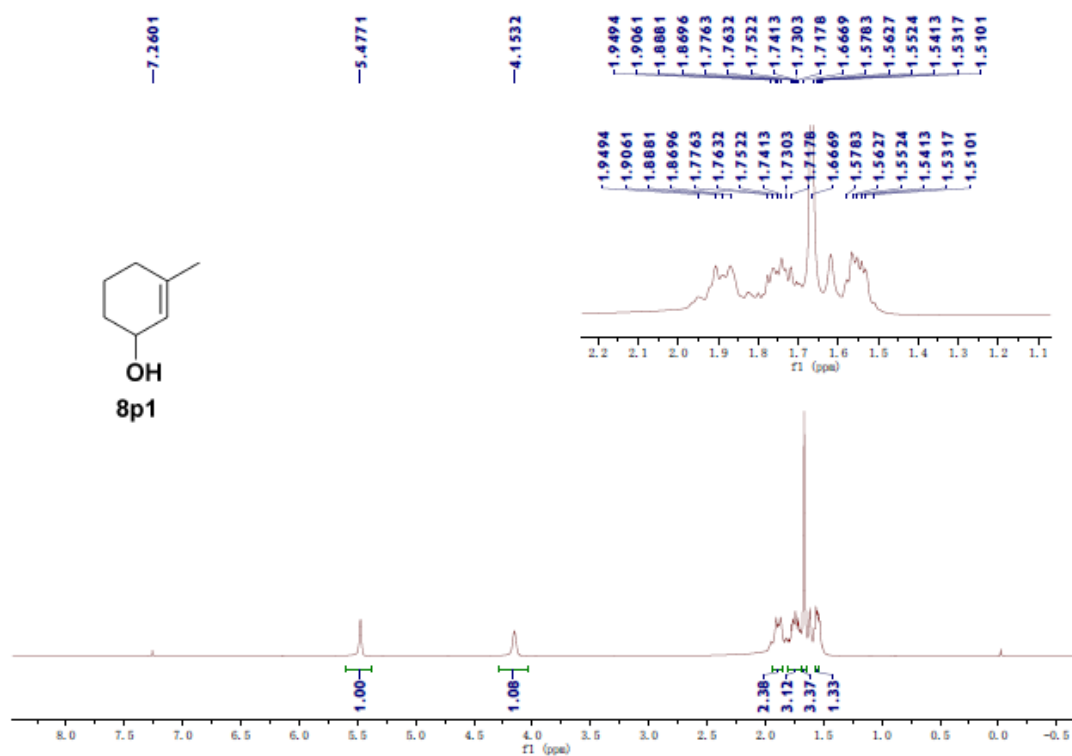

<sup>13</sup>C NMR of **8p1** (100 M, CDCl<sub>3</sub>)

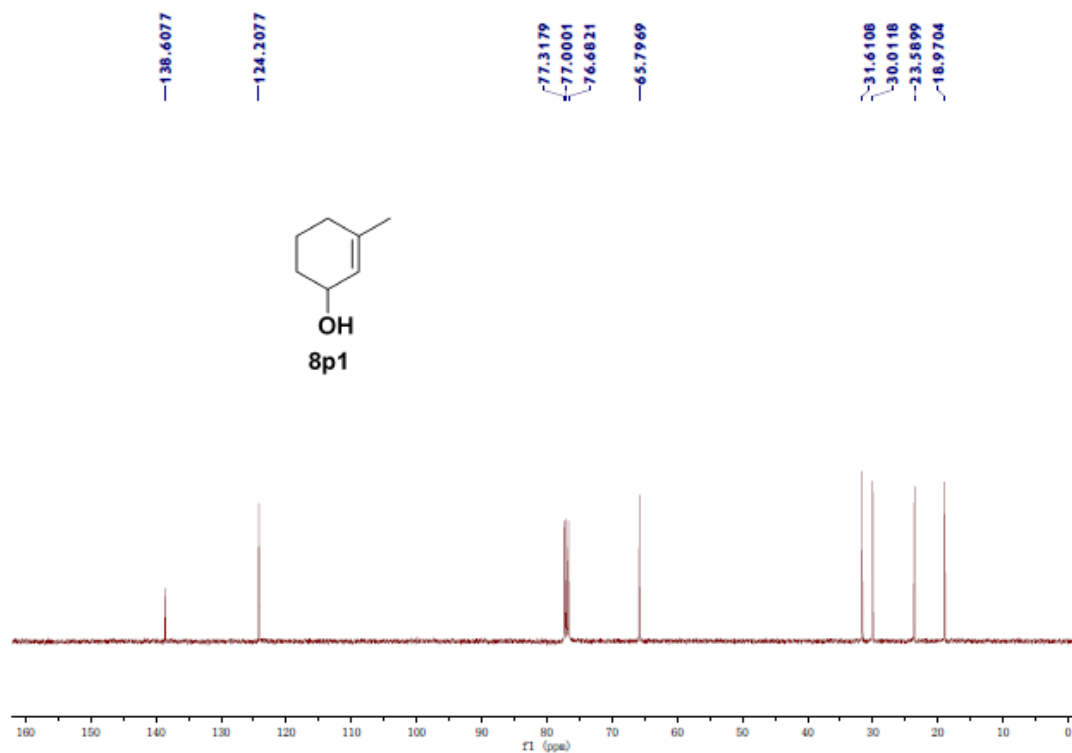

<sup>1</sup>H NMR of **8s1** (600 M, CDCl<sub>3</sub>)

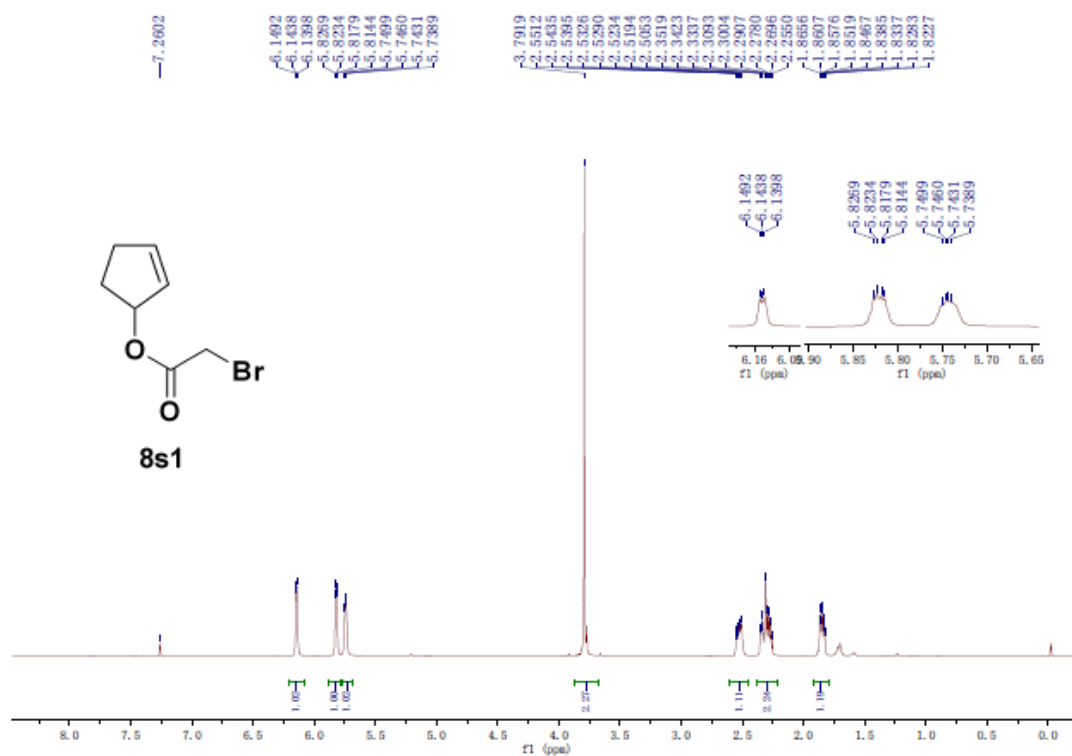

<sup>13</sup>C NMR of **8s1** (150 M, CDCl<sub>3</sub>)

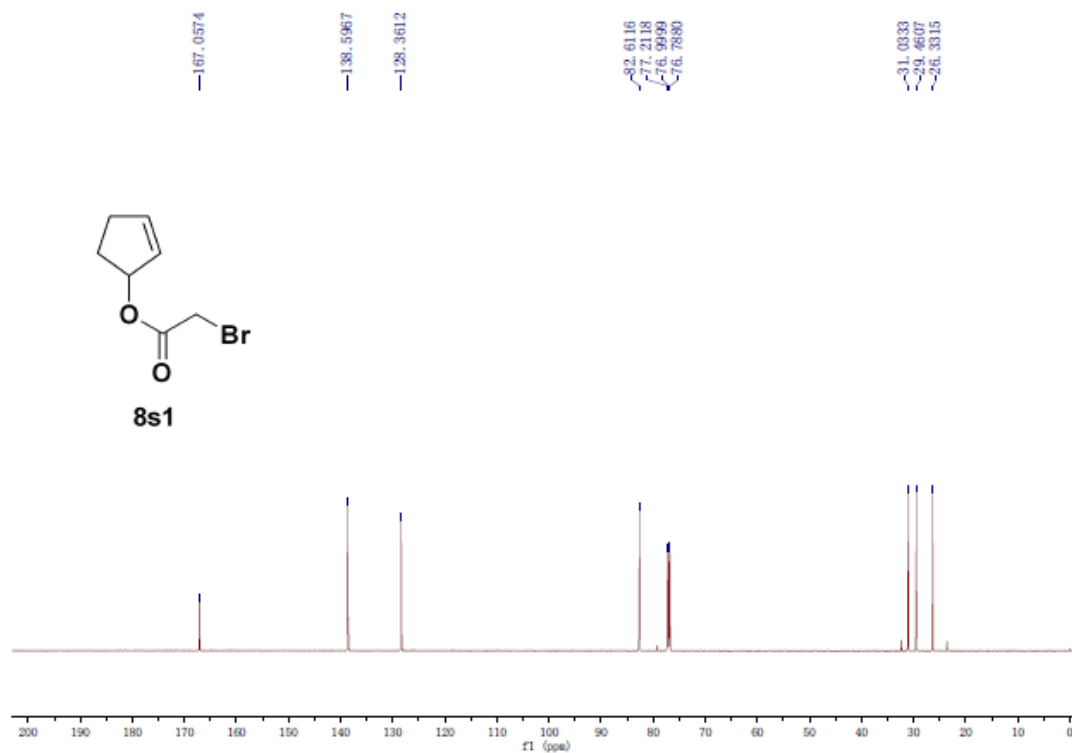

### <sup>1</sup>H NMR of **8s2** (600 M, CDCl<sub>3</sub>)

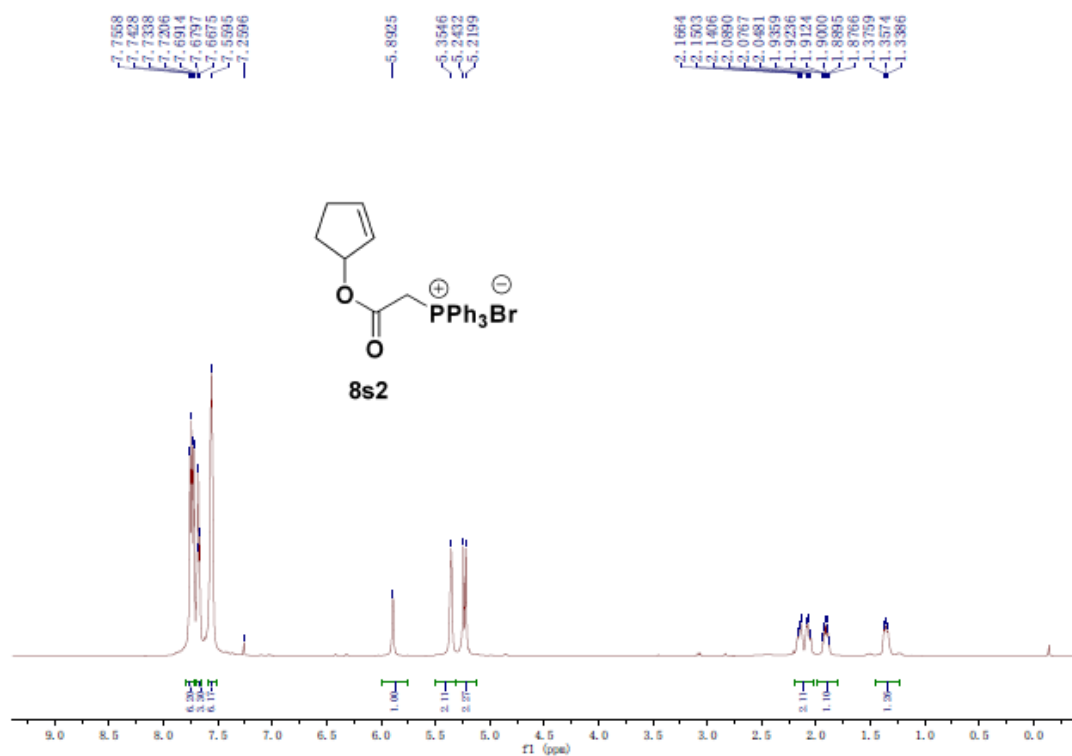

### <sup>13</sup>C NMR of **8s2** (150 M, CDCl<sub>3</sub>)

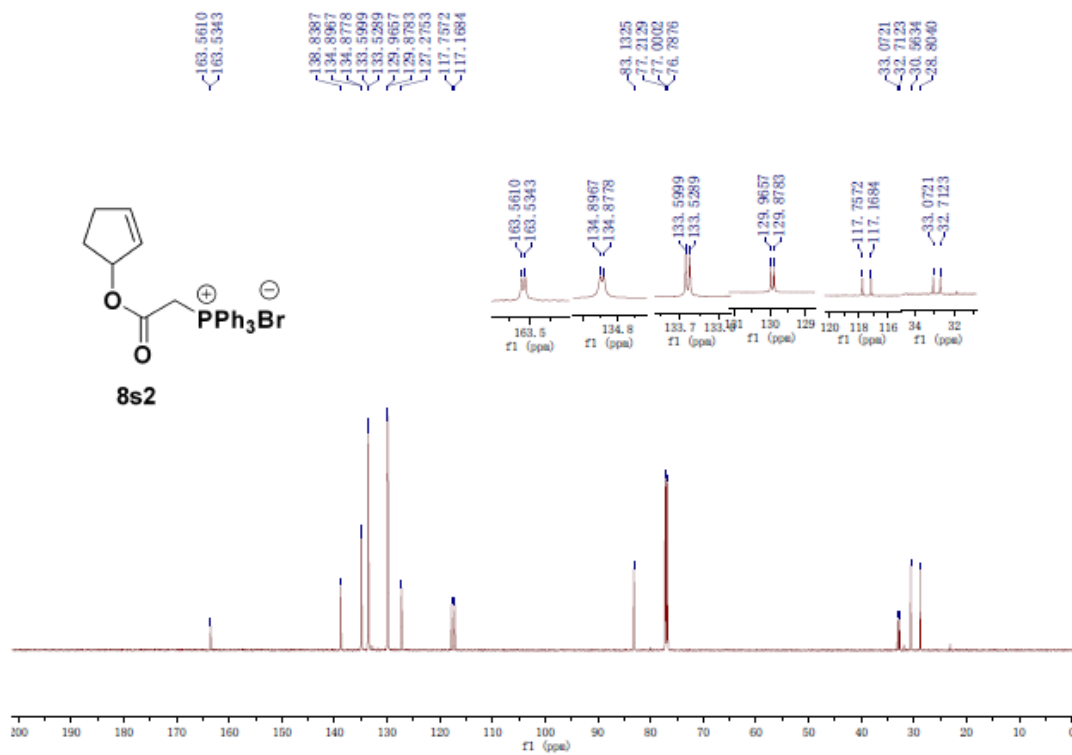



$^{31}\text{P}$  NMR of **8s2** (242 M,  $\text{CDCl}_3$ )

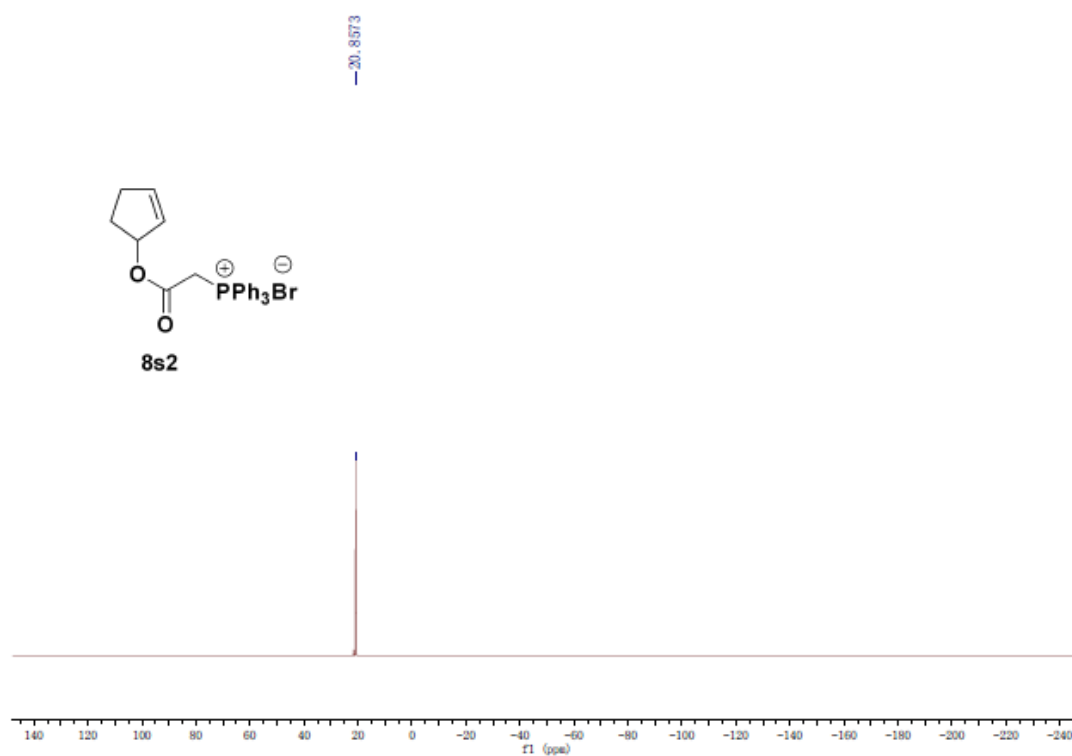

$^1\text{H}$  NMR of **8t1** (400 M,  $\text{CDCl}_3$ )

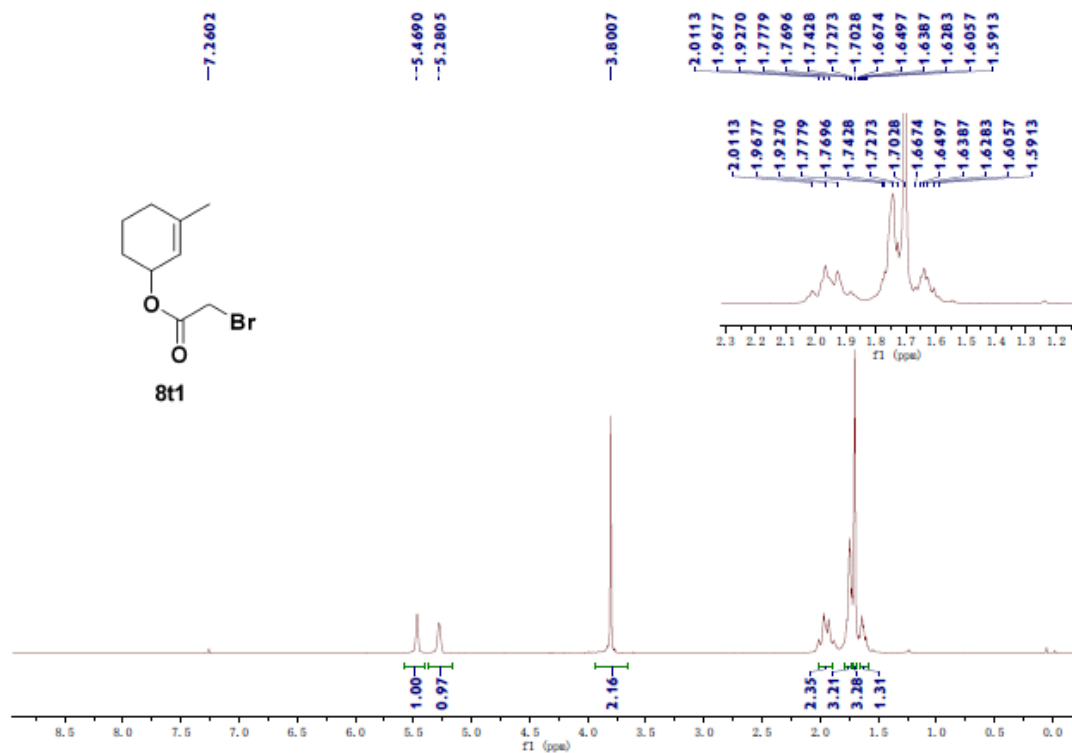

$^{13}\text{C}$  NMR of **8t1** (100 M,  $\text{CDCl}_3$ )

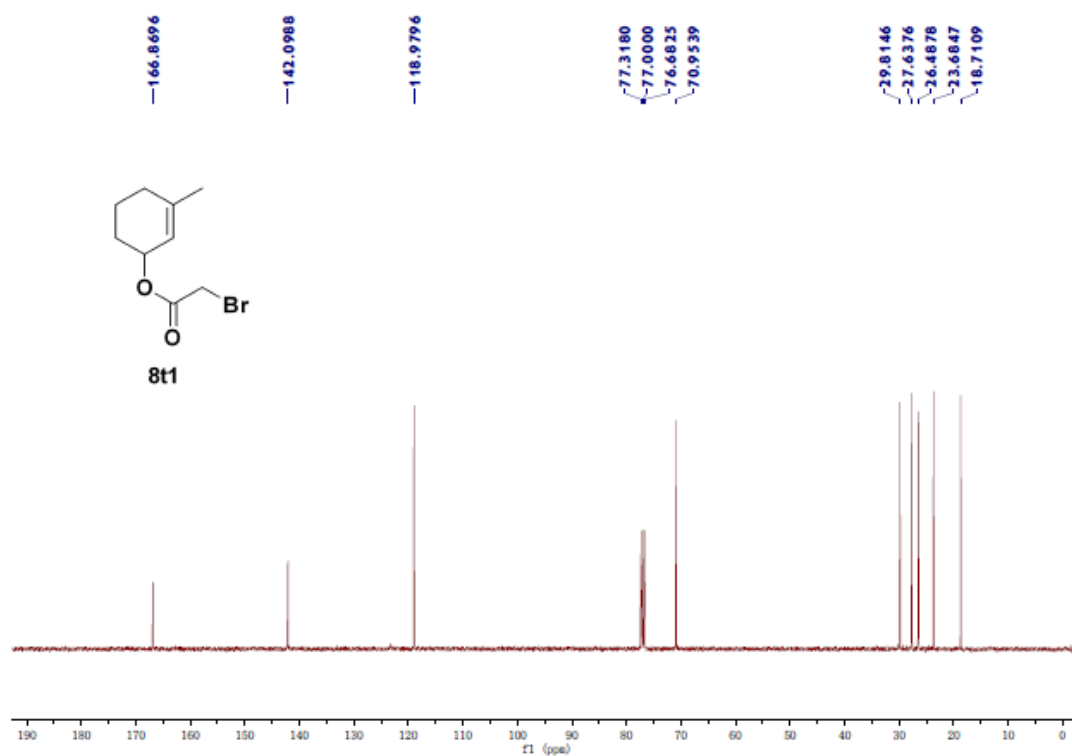

$^1\text{H}$  NMR of **8t2** (400 M,  $\text{CDCl}_3$ )

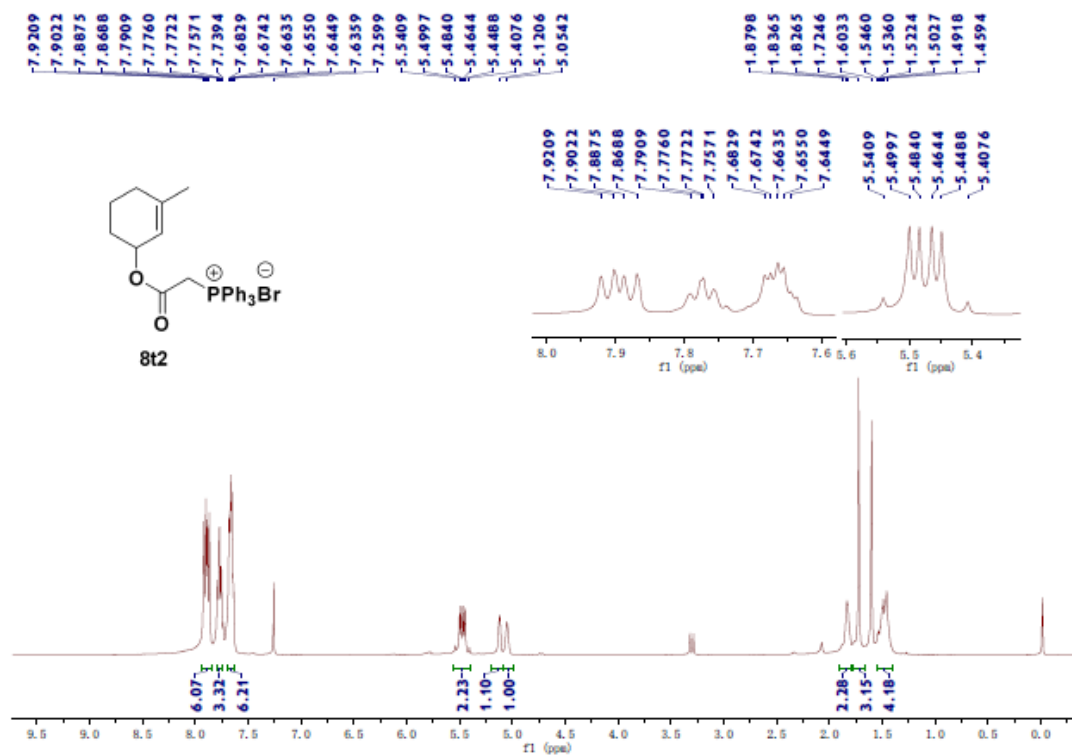

$^{13}\text{C}$  NMR of **8t2** (100 M,  $\text{CDCl}_3$ )

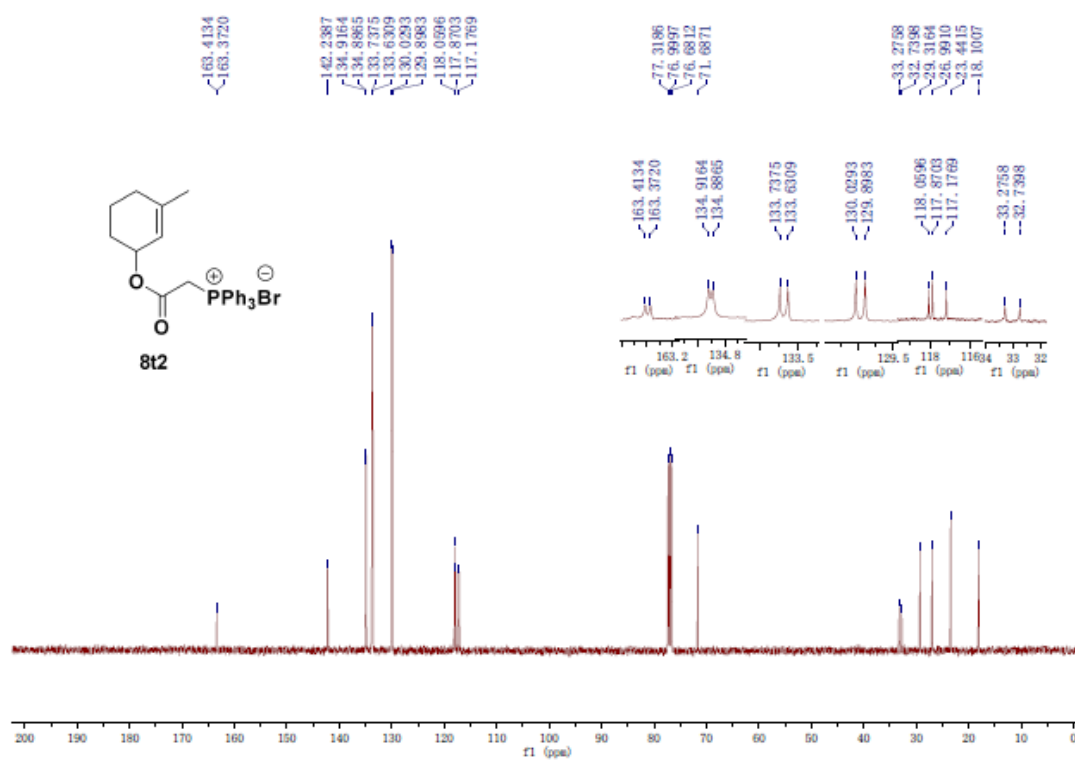

$^{31}\text{P}$  NMR of **8t2** (242 M,  $\text{CDCl}_3$ )

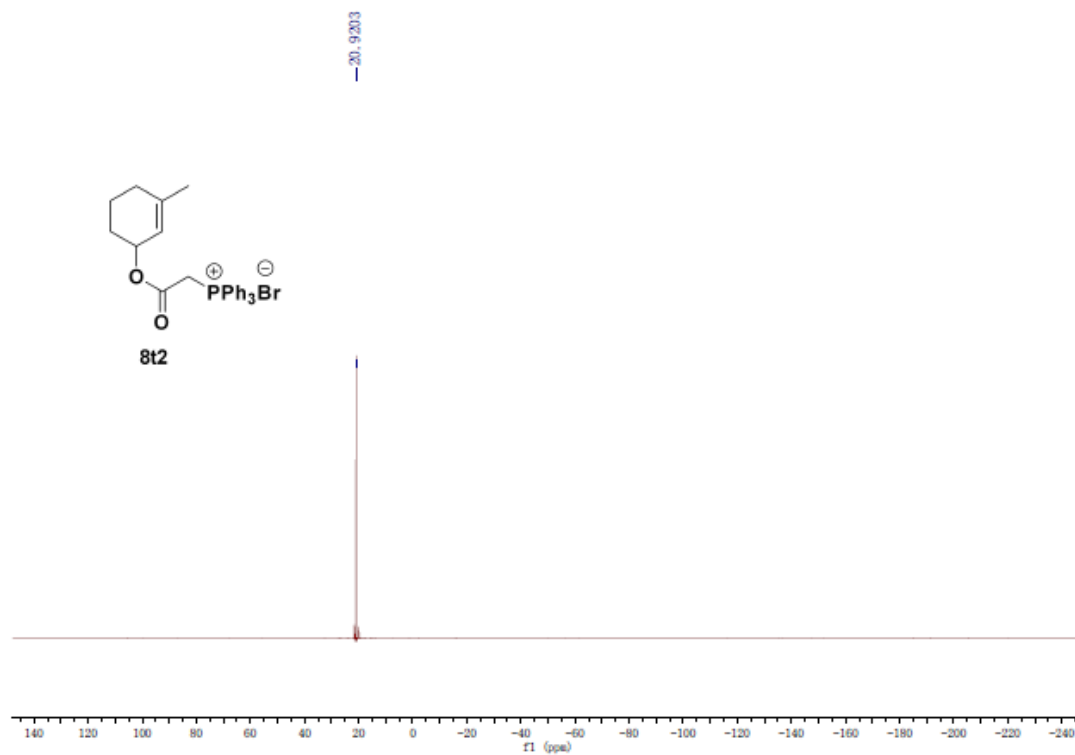





$^{31}\text{P}$  NMR of **8u2** (242 M,  $\text{CDCl}_3$ )

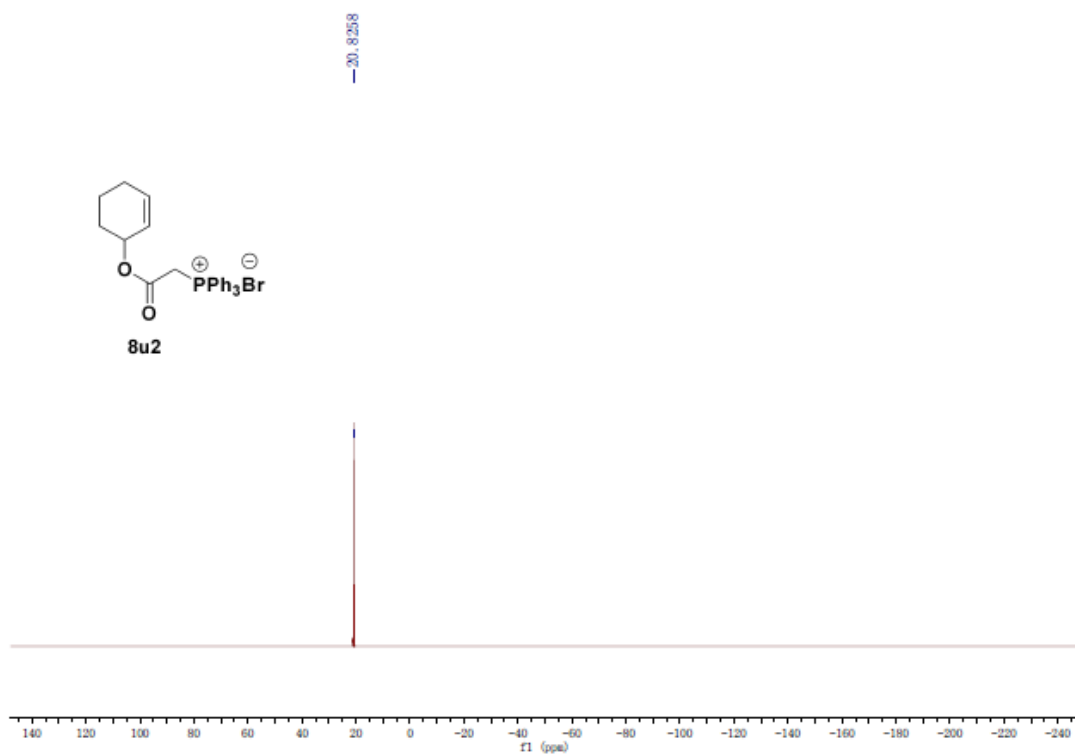

$^1\text{H}$  NMR of **8a** (400 M,  $\text{CDCl}_3$ )

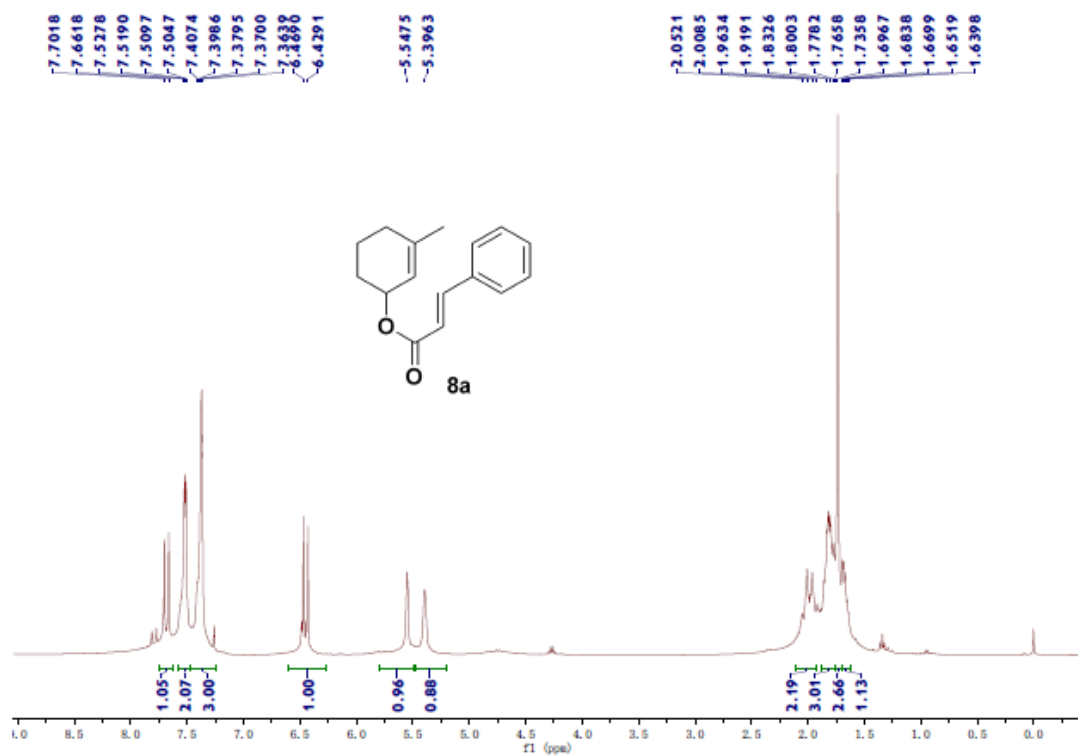

$^{13}\text{C}$  NMR of **8a** (100 M,  $\text{CDCl}_3$ )

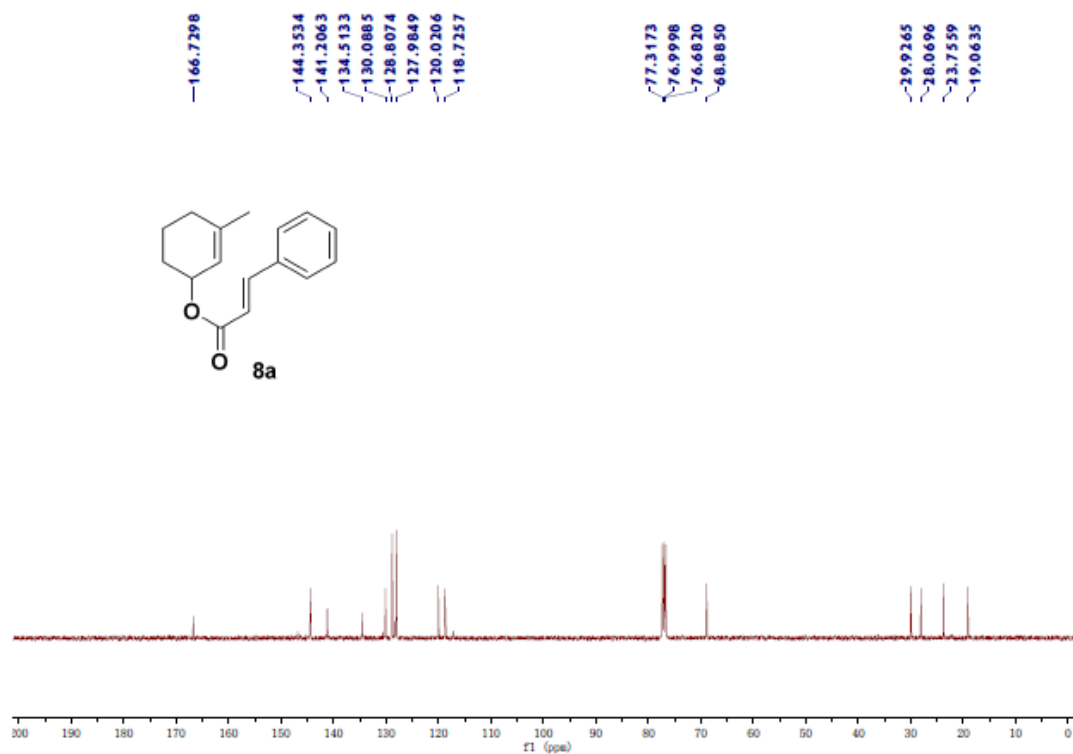

$^1\text{H}$  NMR of **8b** (400 M,  $\text{CDCl}_3$ )

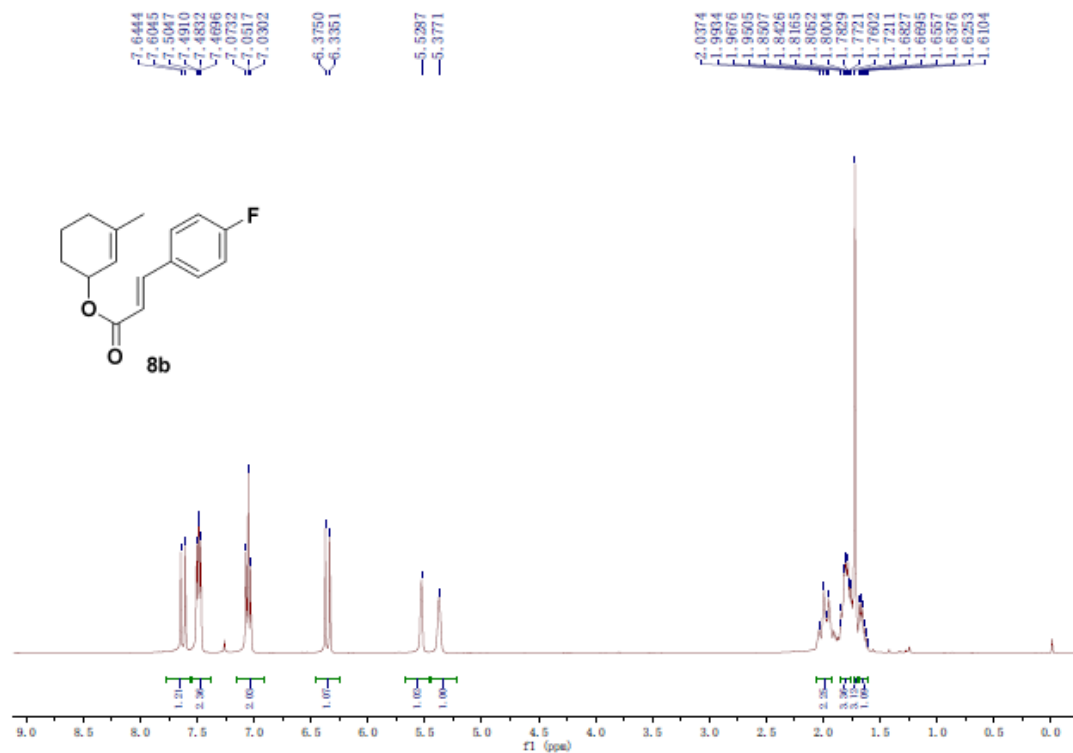

$^{13}\text{C}$  NMR of **8b** (100 M,  $\text{CDCl}_3$ )

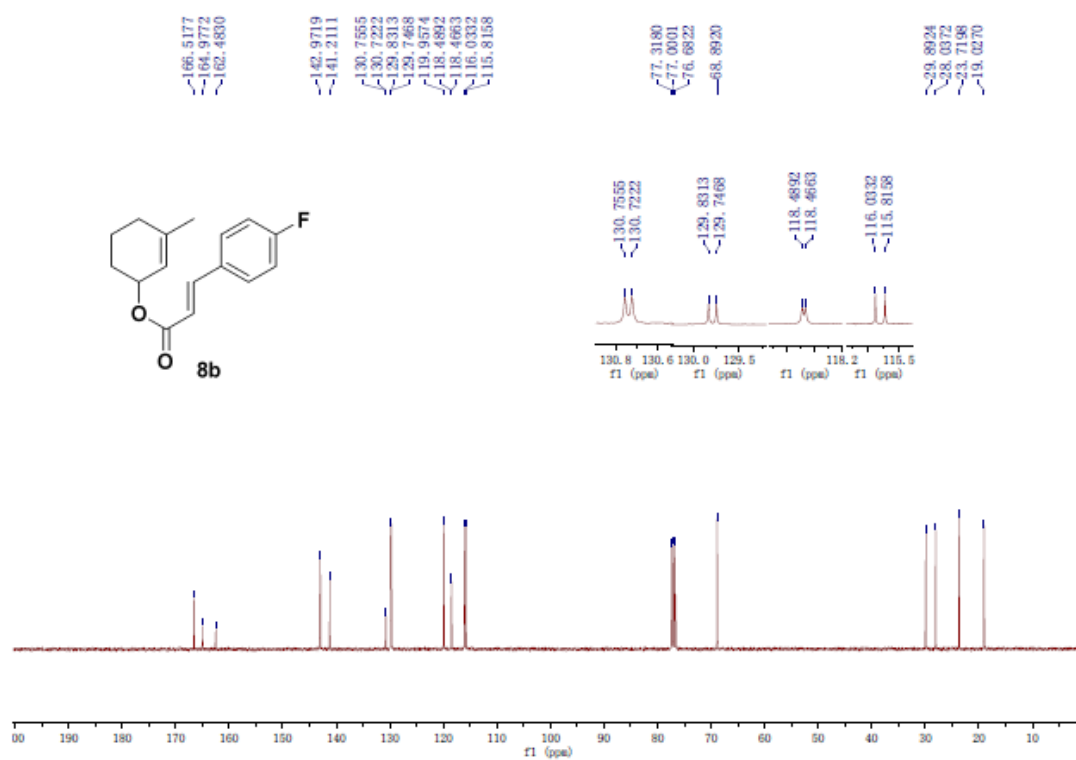

$^{19}\text{F}$  NMR of **8b** (376 M,  $\text{CDCl}_3$ )

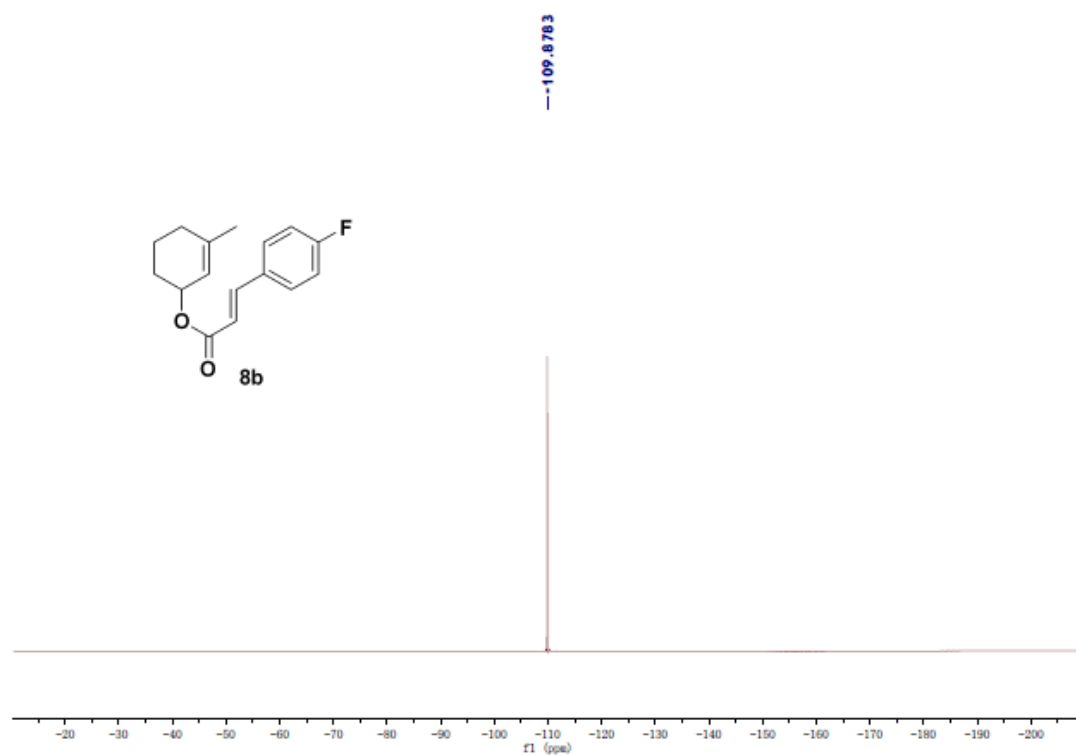



$^1\text{H}$  NMR of **8c** (400 M,  $\text{CDCl}_3$ )

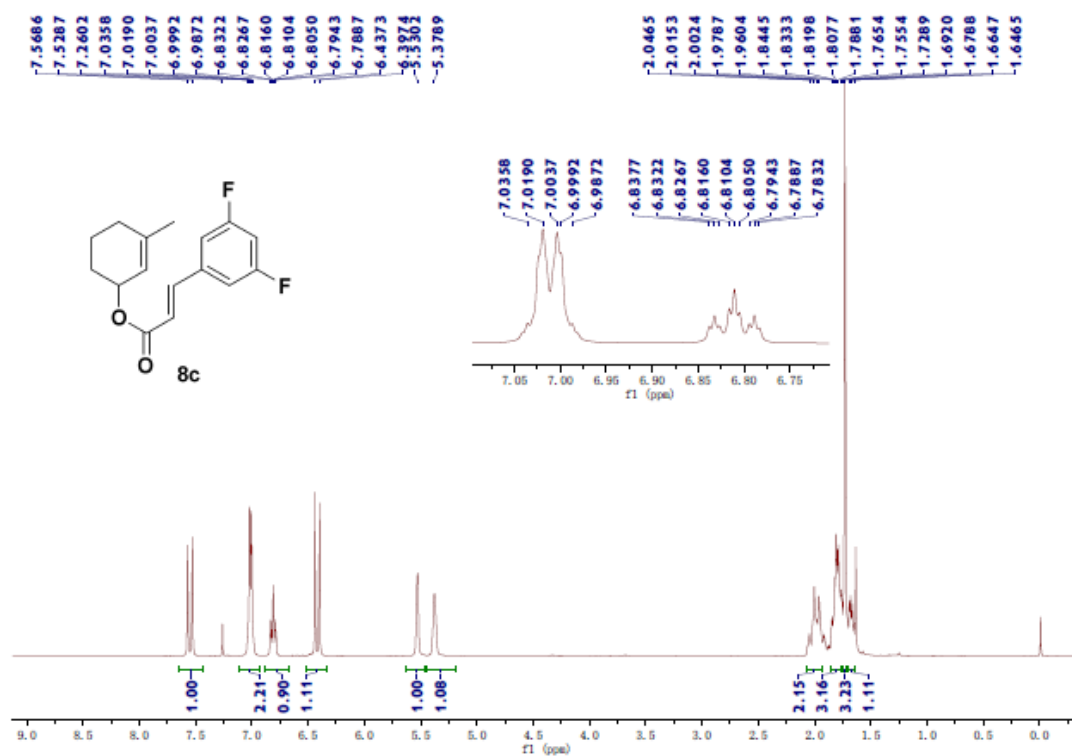

$^{13}\text{C}$  NMR of **8c** (100 M,  $\text{CDCl}_3$ )

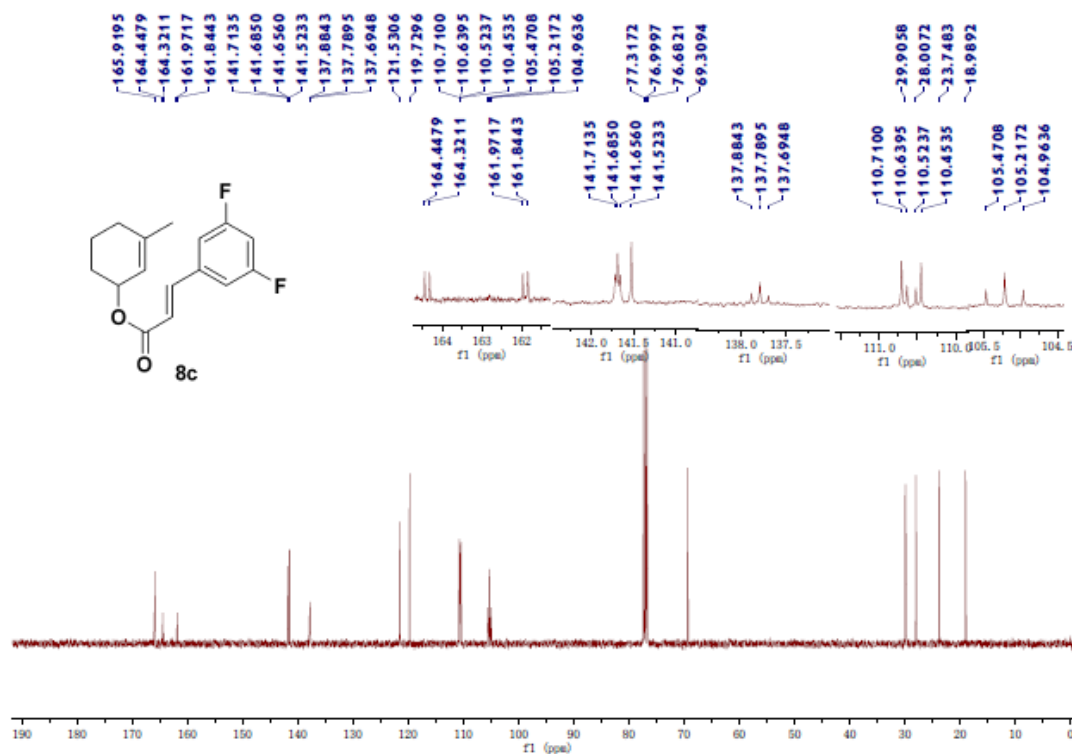

$^{19}\text{F}$  NMR of **8c** (376 M,  $\text{CDCl}_3$ )

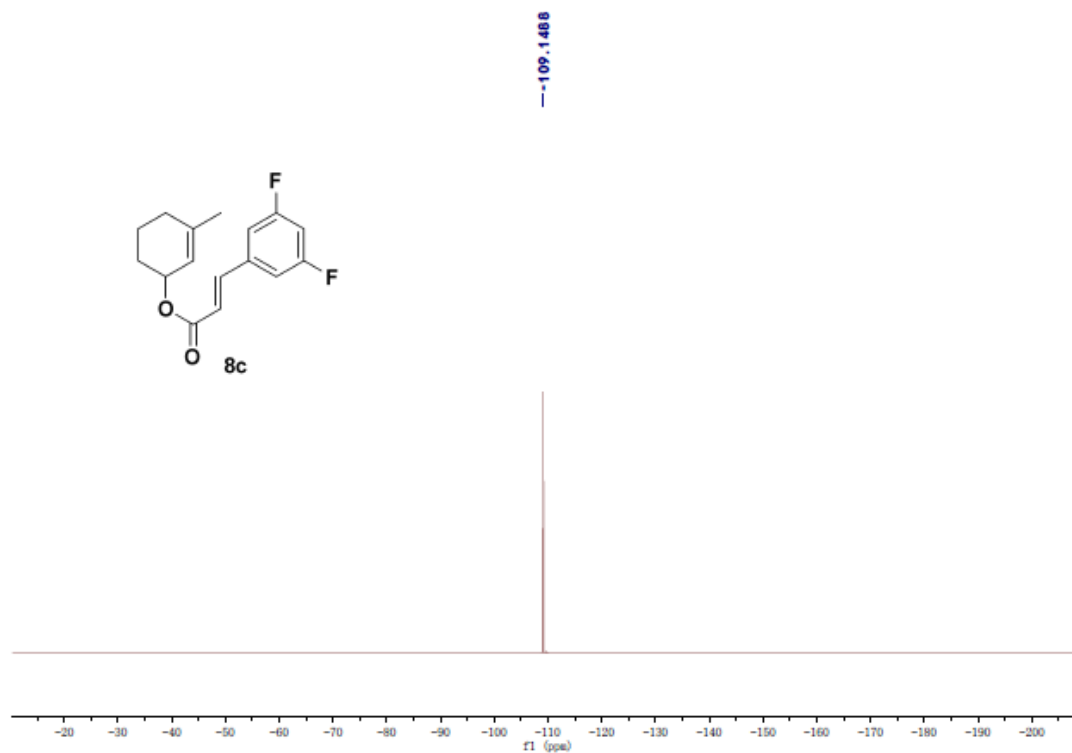

$^1\text{H}$  NMR of **8d** (400 M,  $\text{CDCl}_3$ )

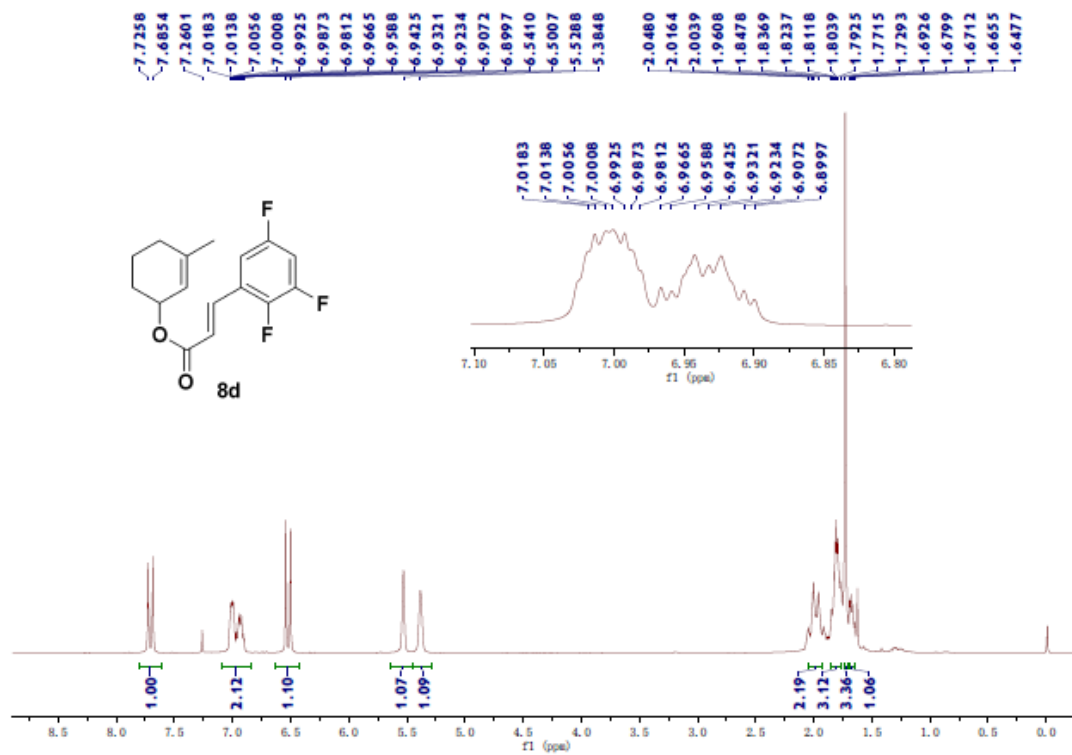

<sup>13</sup>C NMR of **8d** (100 M, CDCl<sub>3</sub>)

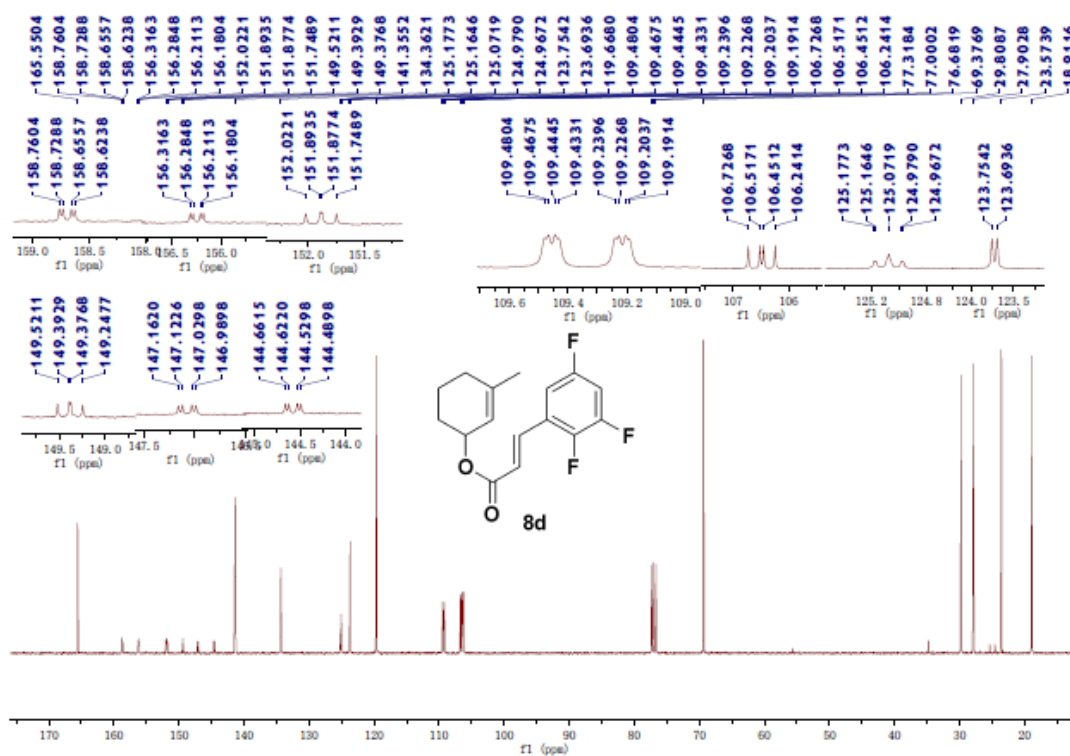

<sup>19</sup>F NMR of **8d** (376 M, CDCl<sub>3</sub>)

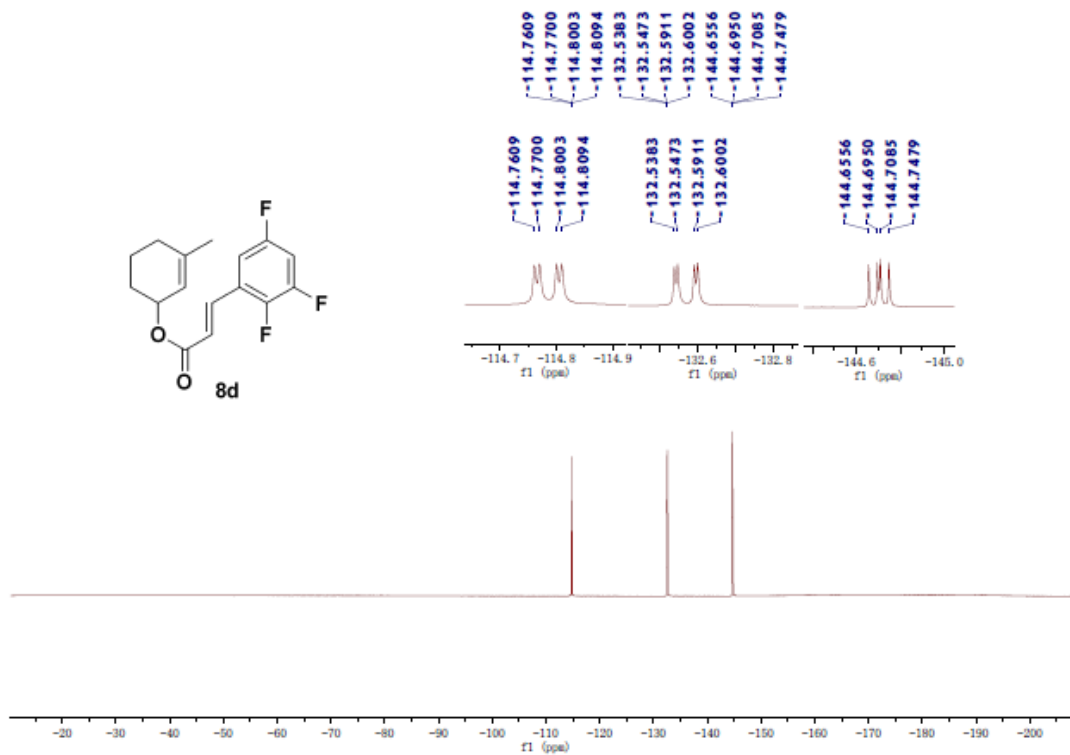

$^1\text{H}$  NMR of **8e** (400 M,  $\text{CDCl}_3$ )

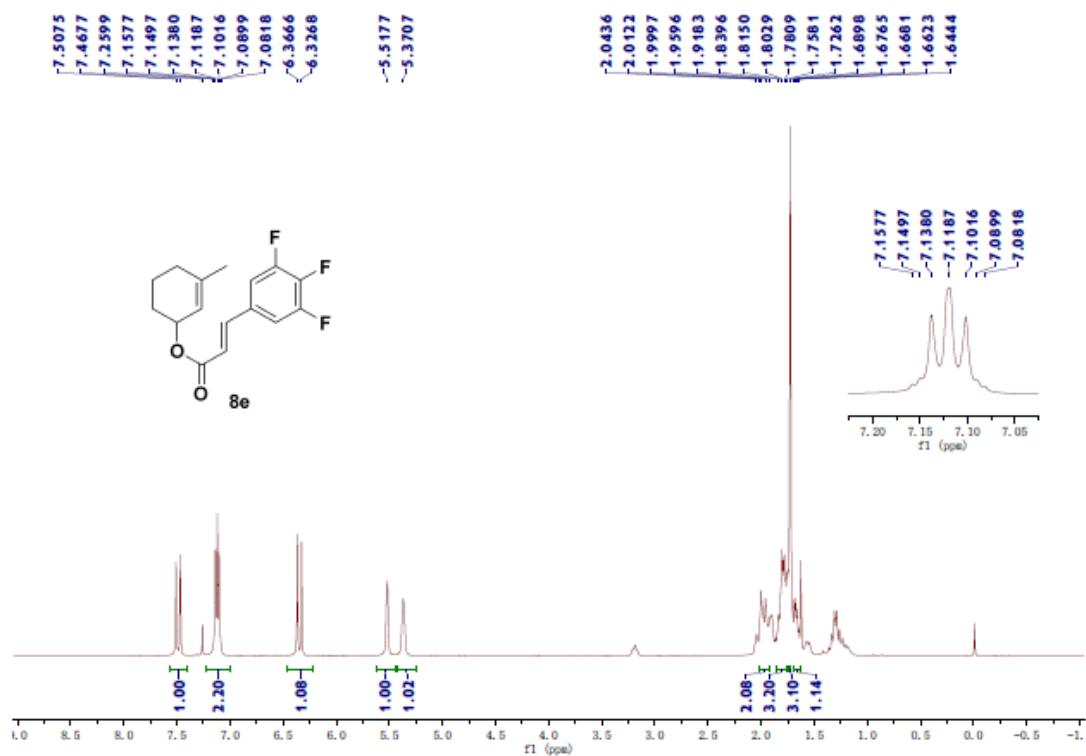

$^{13}\text{C}$  NMR of **8e** (100 M,  $\text{CDCl}_3$ )

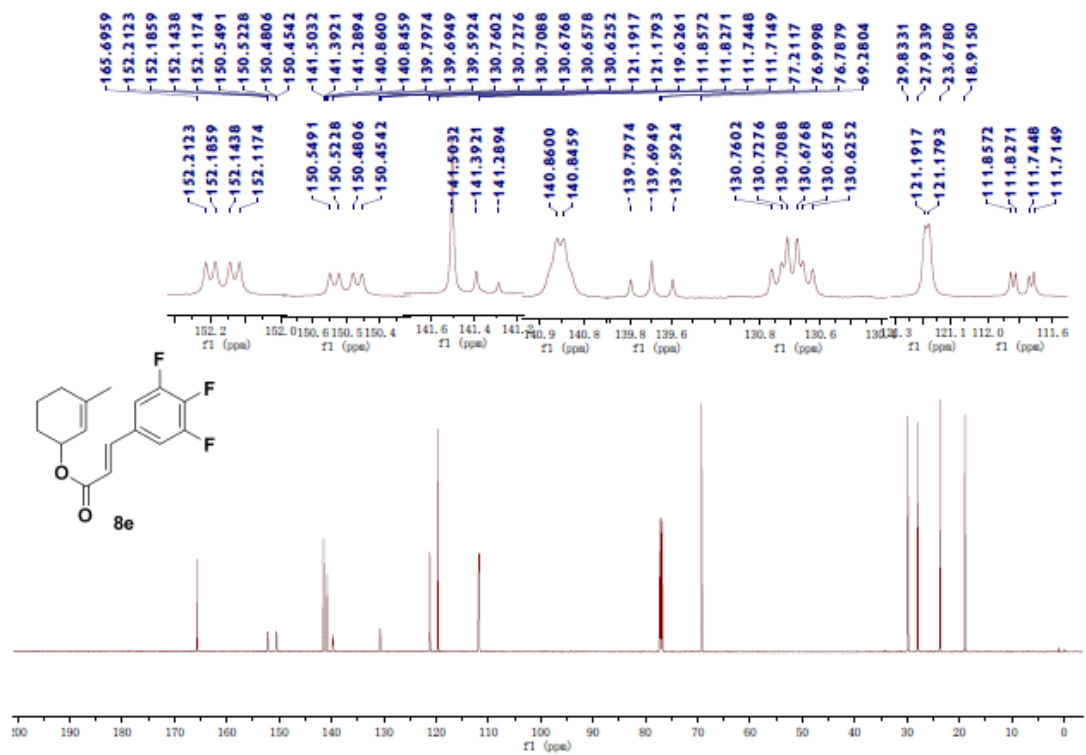

$^{19}\text{F}$  NMR of **8e** (376 M,  $\text{CDCl}_3$ )

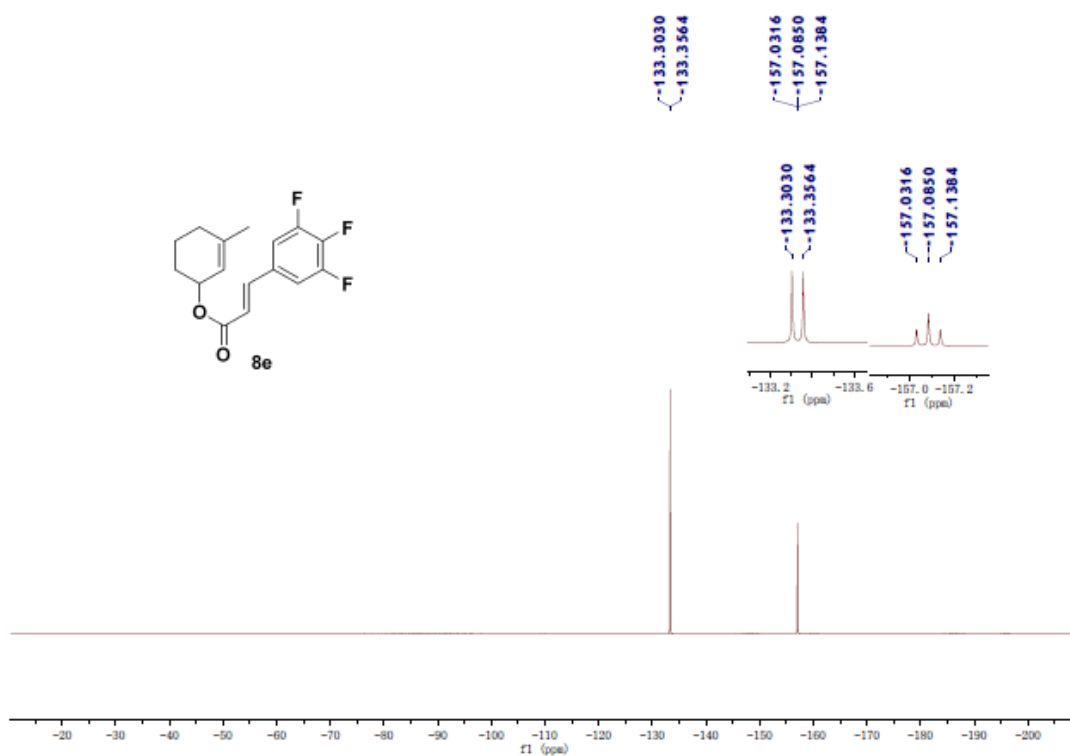

$^1\text{H}$  NMR of **8f** (400 M,  $\text{CDCl}_3$ )

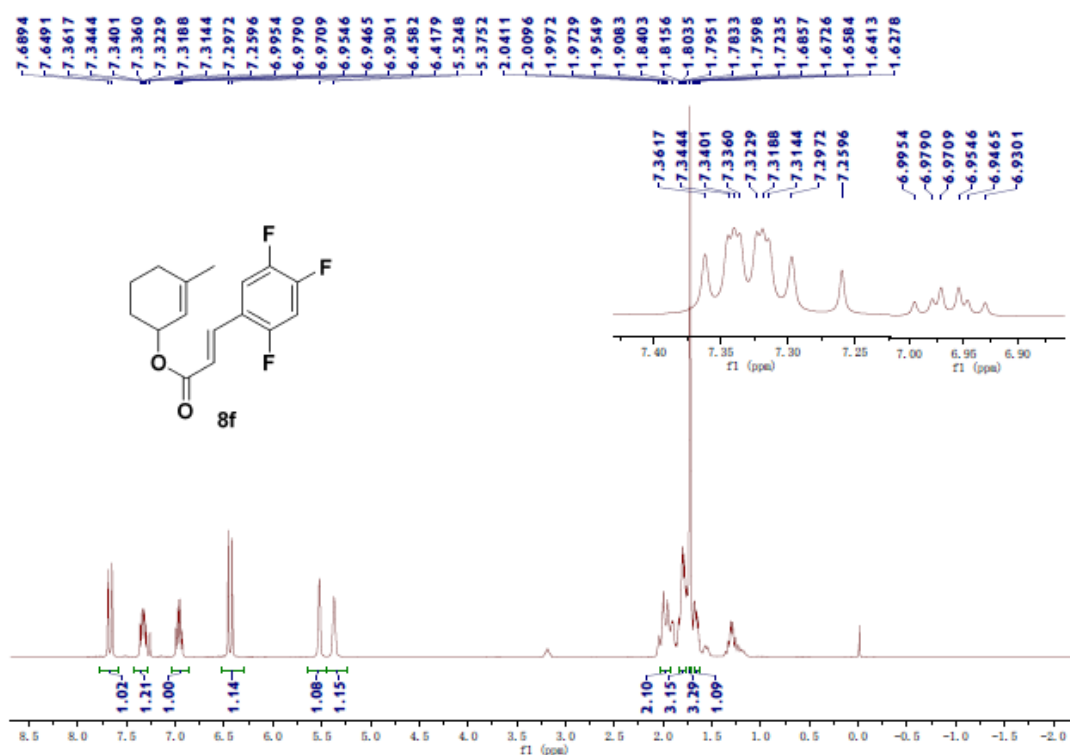

<sup>13</sup>C NMR of **8f** (100 M, CDCl<sub>3</sub>)

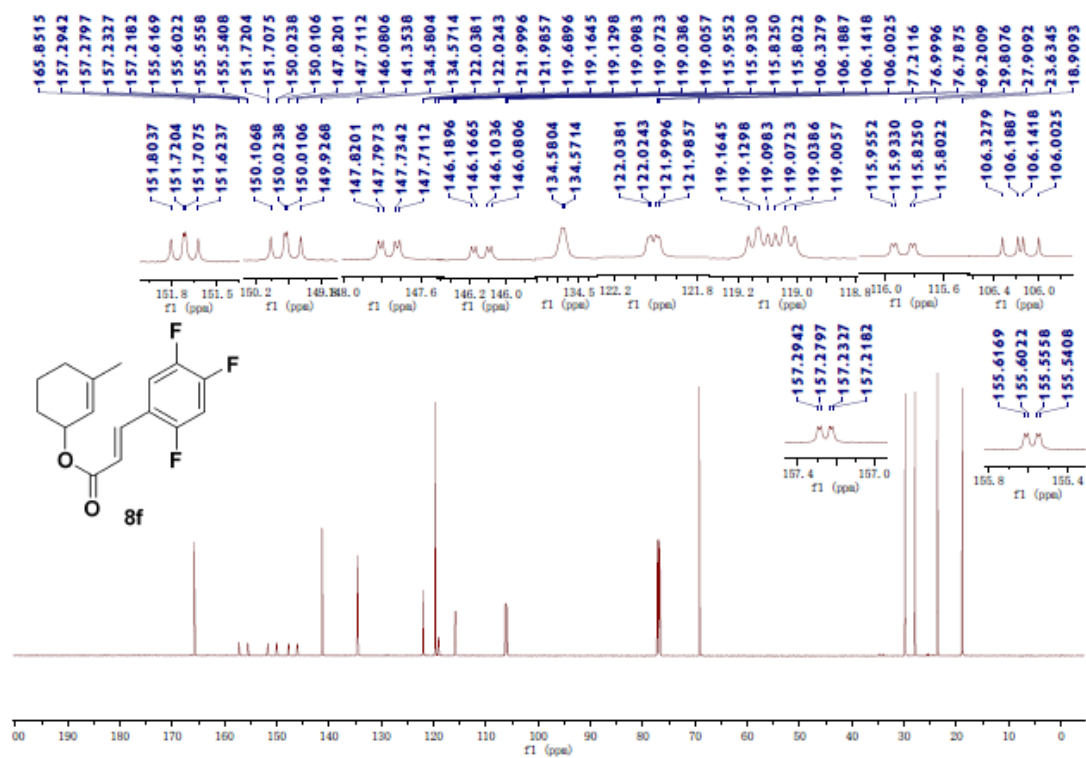

<sup>19</sup>F NMR of **8f** (376 M, CDCl<sub>3</sub>)

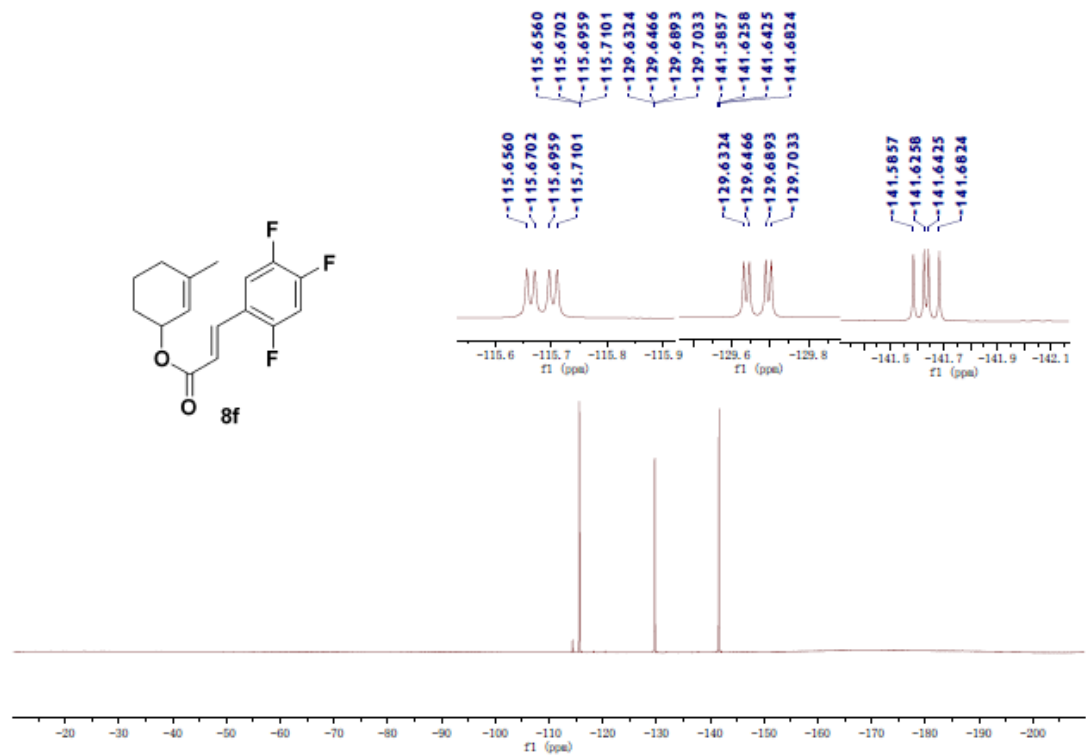

<sup>1</sup>H NMR of **8g** (400 M, CDCl<sub>3</sub>)

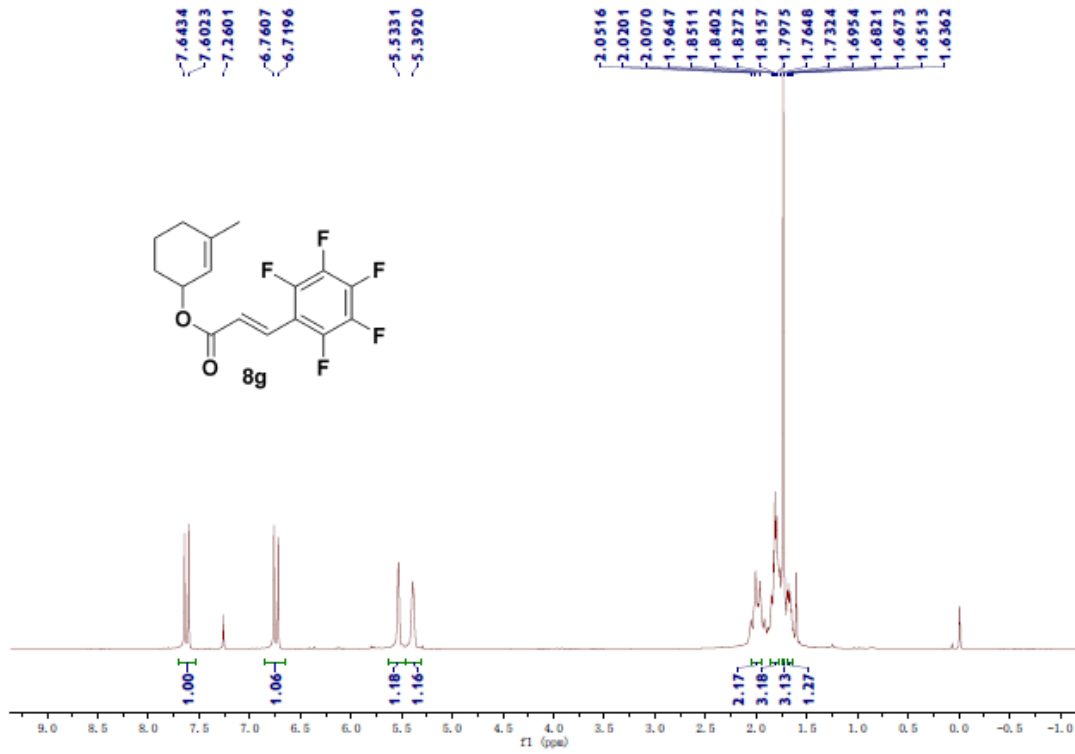

<sup>13</sup>C NMR of **8g** (100 M, CDCl<sub>3</sub>)

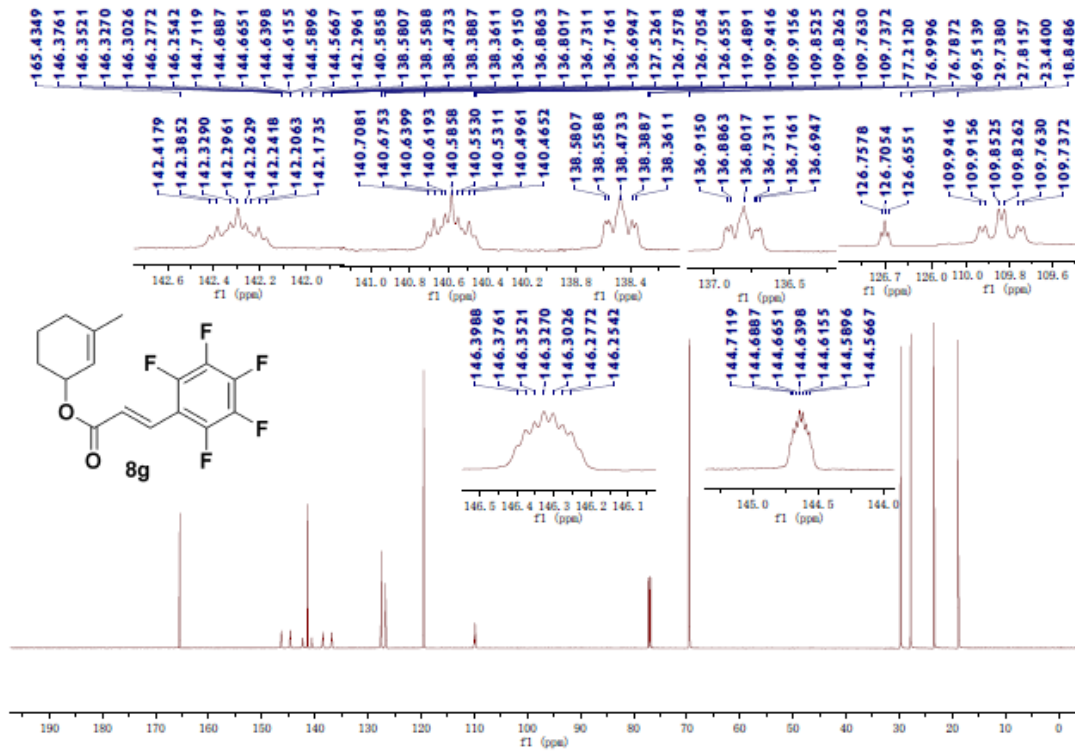

$^{19}\text{F}$  NMR of **8g** (376 M,  $\text{CDCl}_3$ )

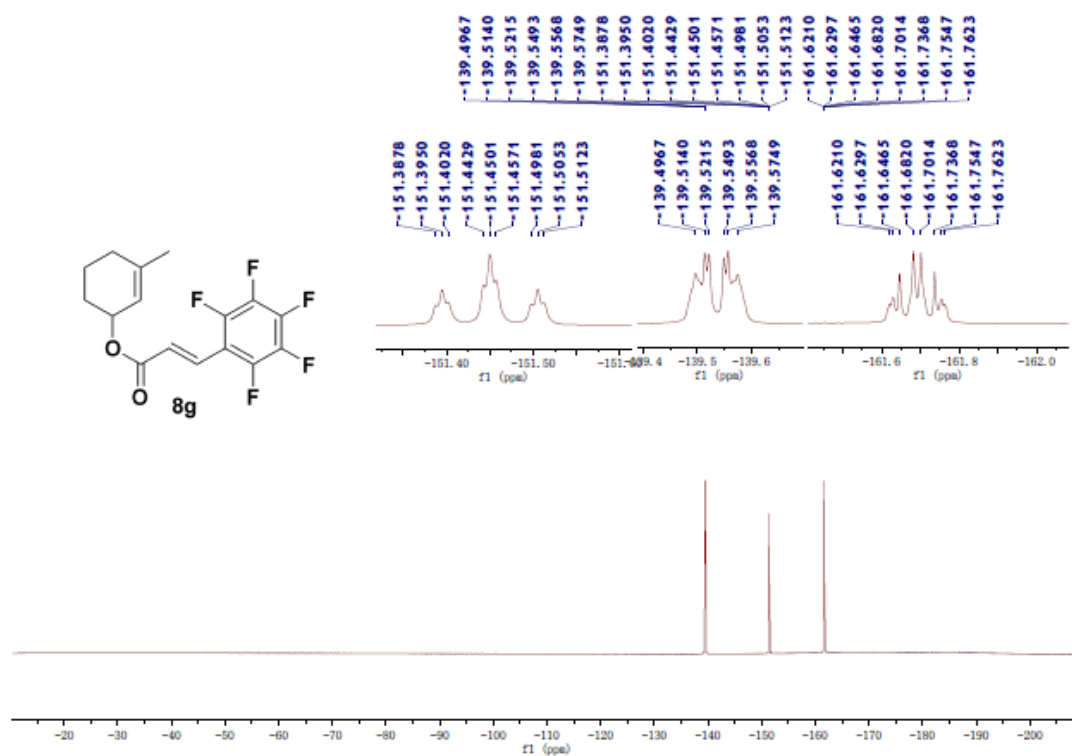

$^1\text{H}$  NMR of **8h** (400 M,  $\text{CDCl}_3$ )

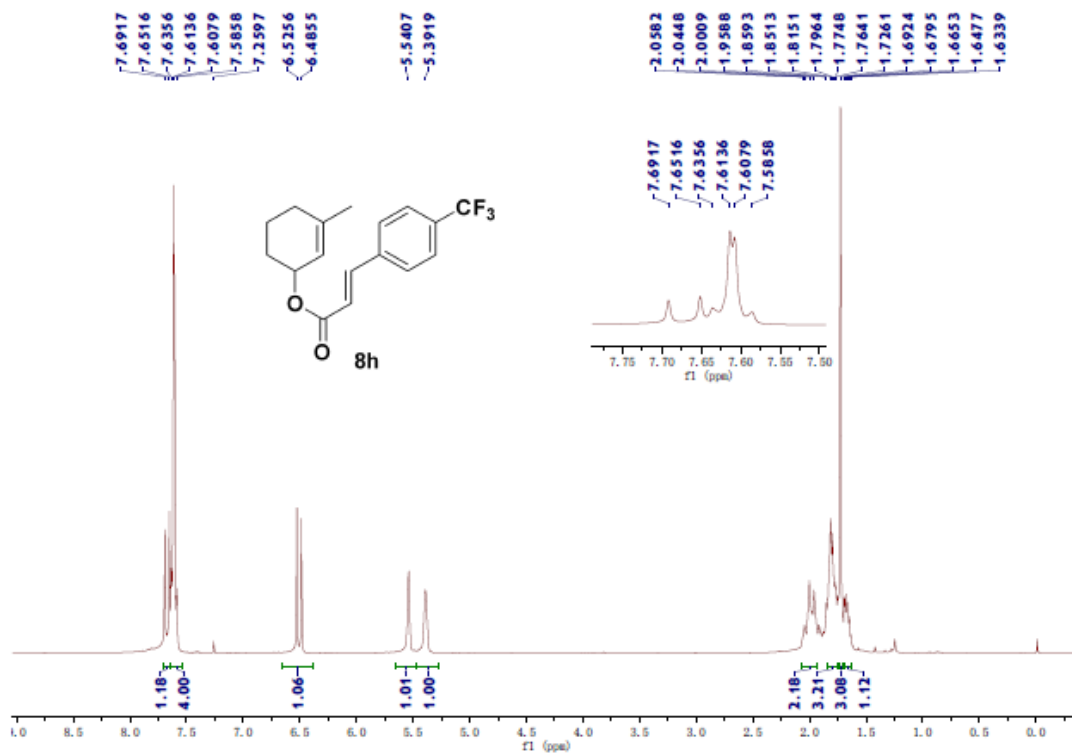



$^{13}\text{C}$  NMR of **8h** (100 M,  $\text{CDCl}_3$ )

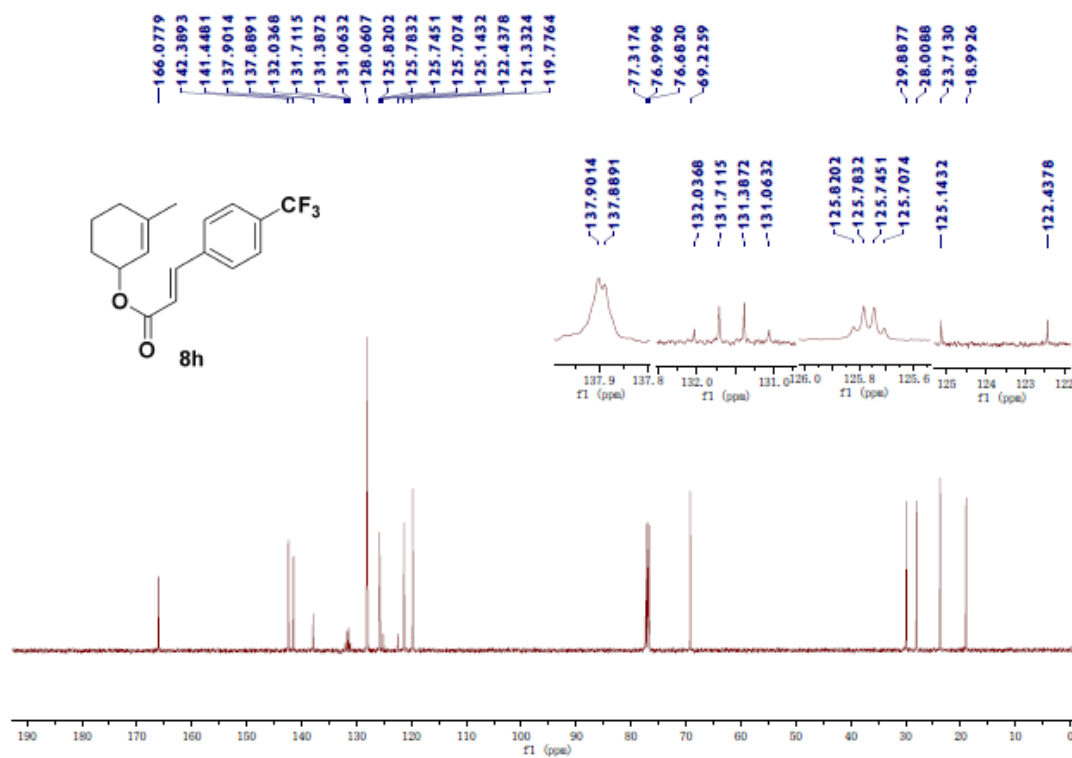

$^{19}\text{F}$  NMR of **8h** (376 M,  $\text{CDCl}_3$ )

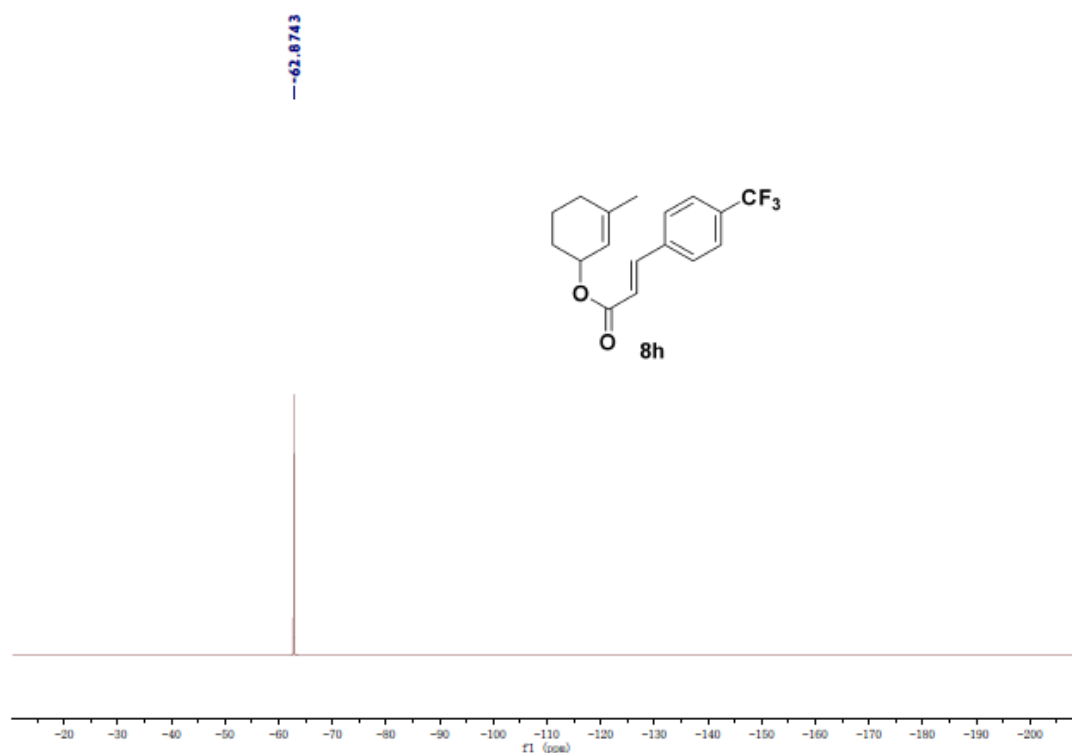

<sup>1</sup>H NMR of **8i** (400 M, CDCl<sub>3</sub>)

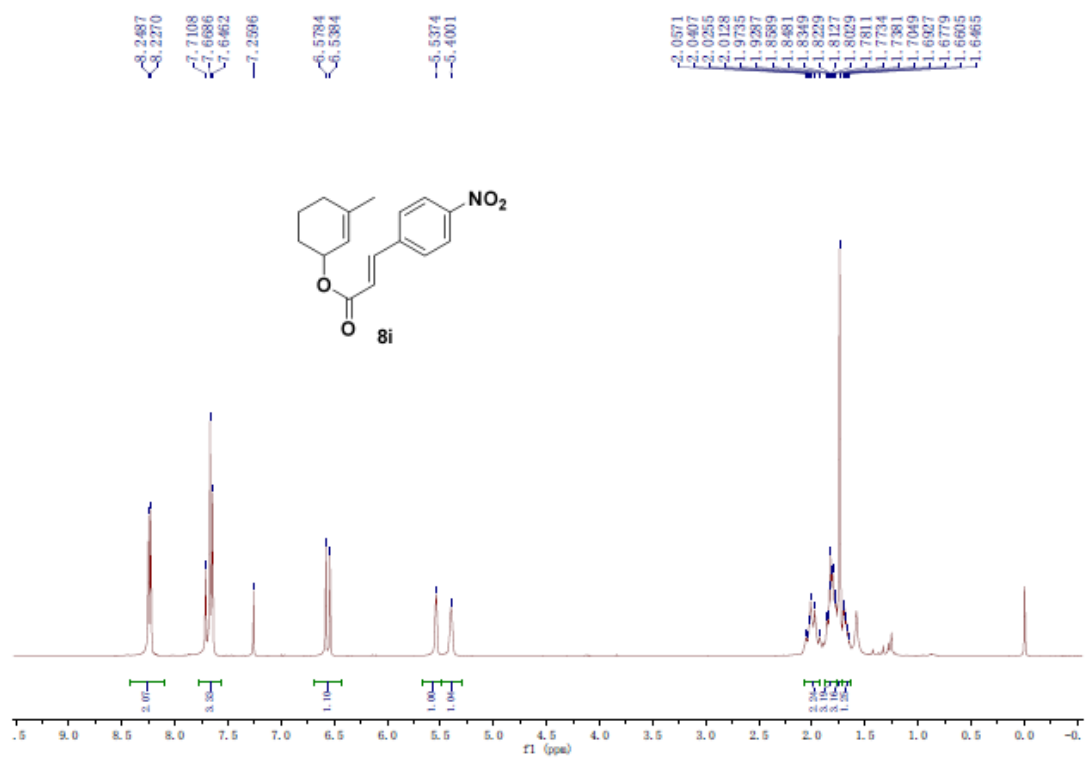

<sup>13</sup>C NMR of **8i** (100 M, CDCl<sub>3</sub>)

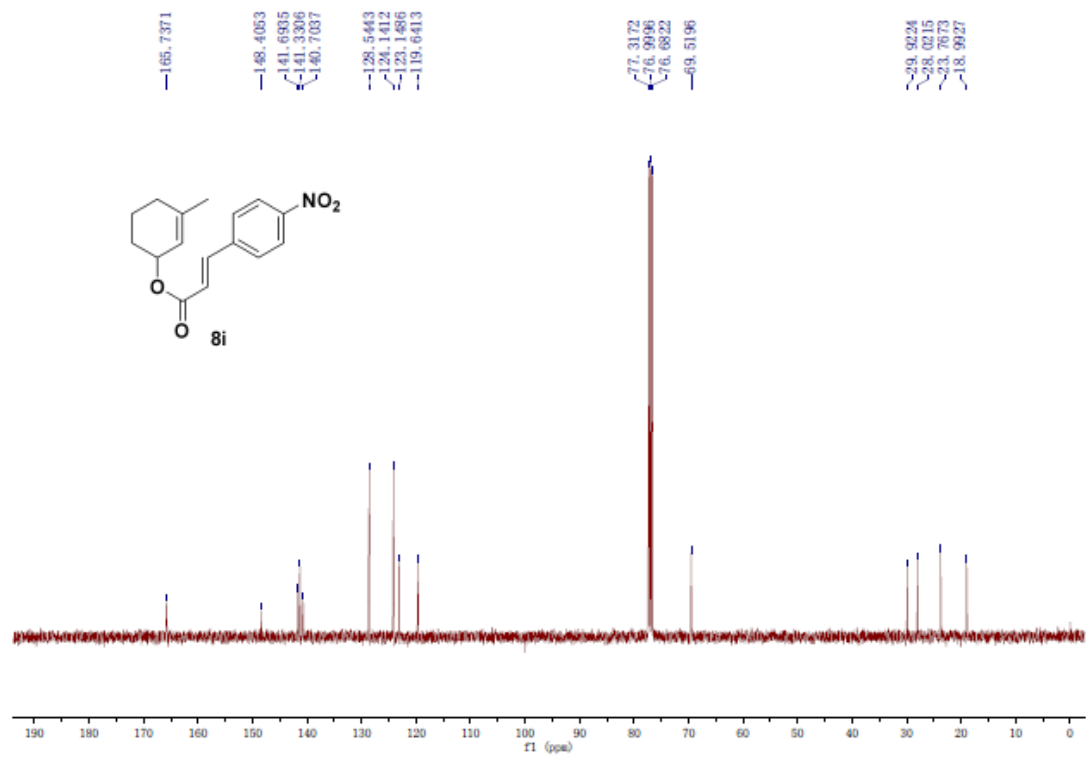

<sup>1</sup>H NMR of **8j** (400 M, CDCl<sub>3</sub>)

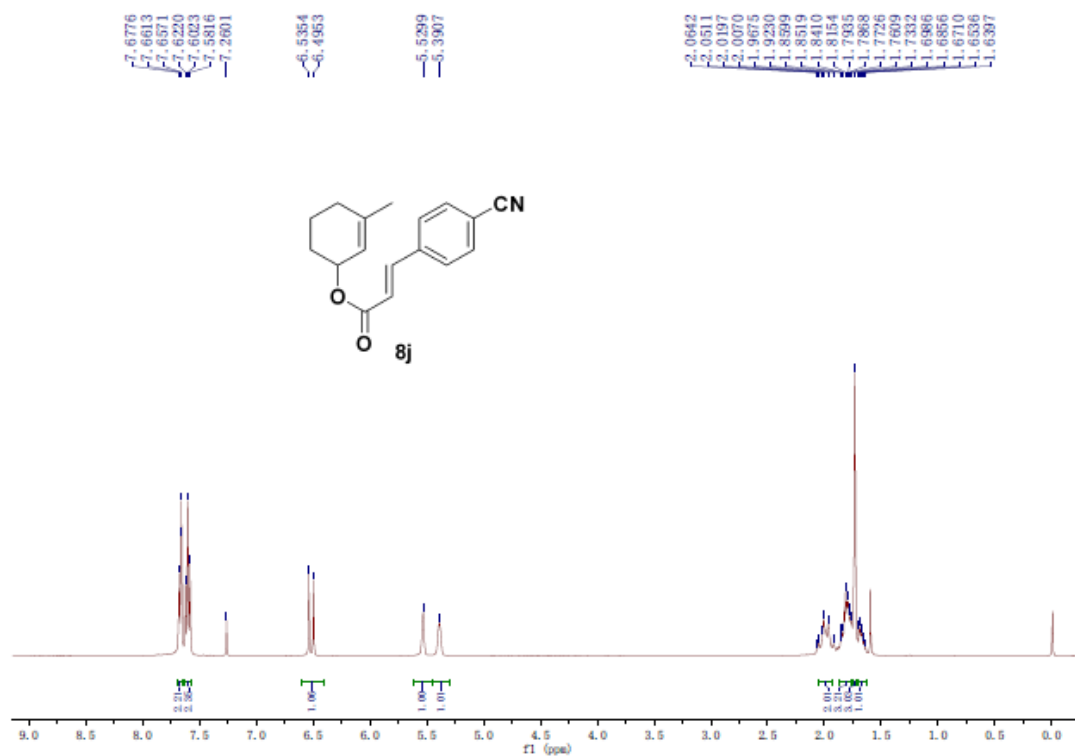

<sup>13</sup>C NMR of **8j** (150 M, CDCl<sub>3</sub>)

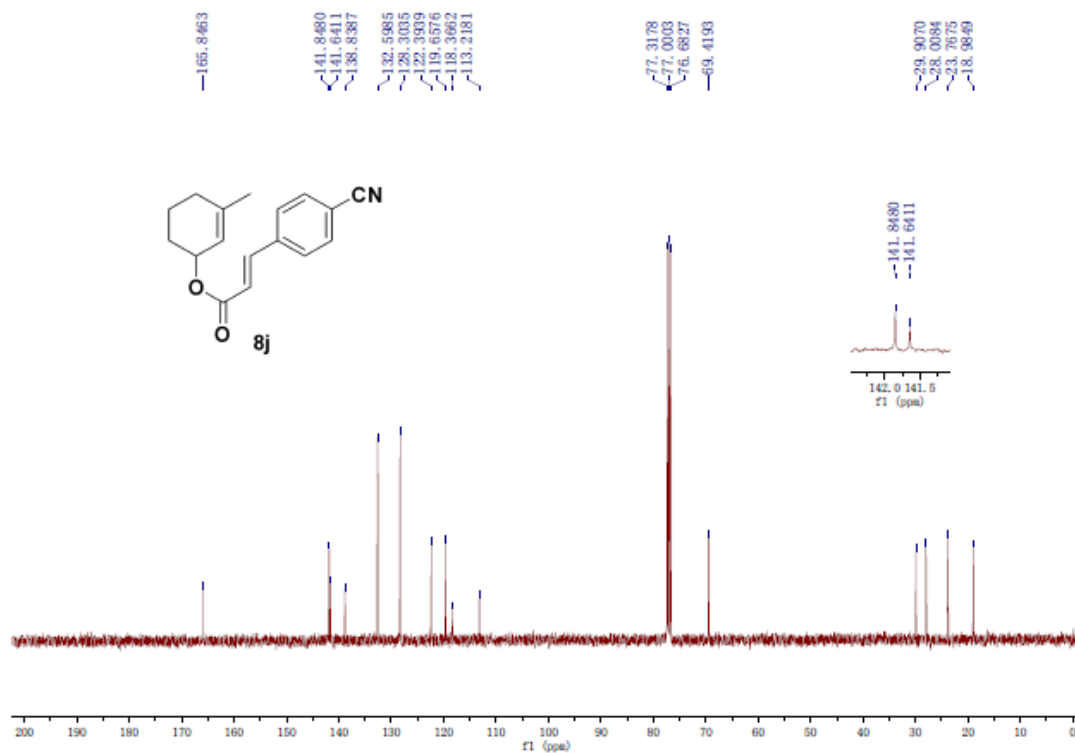

<sup>1</sup>H NMR of **8k** (400 M, CDCl<sub>3</sub>)

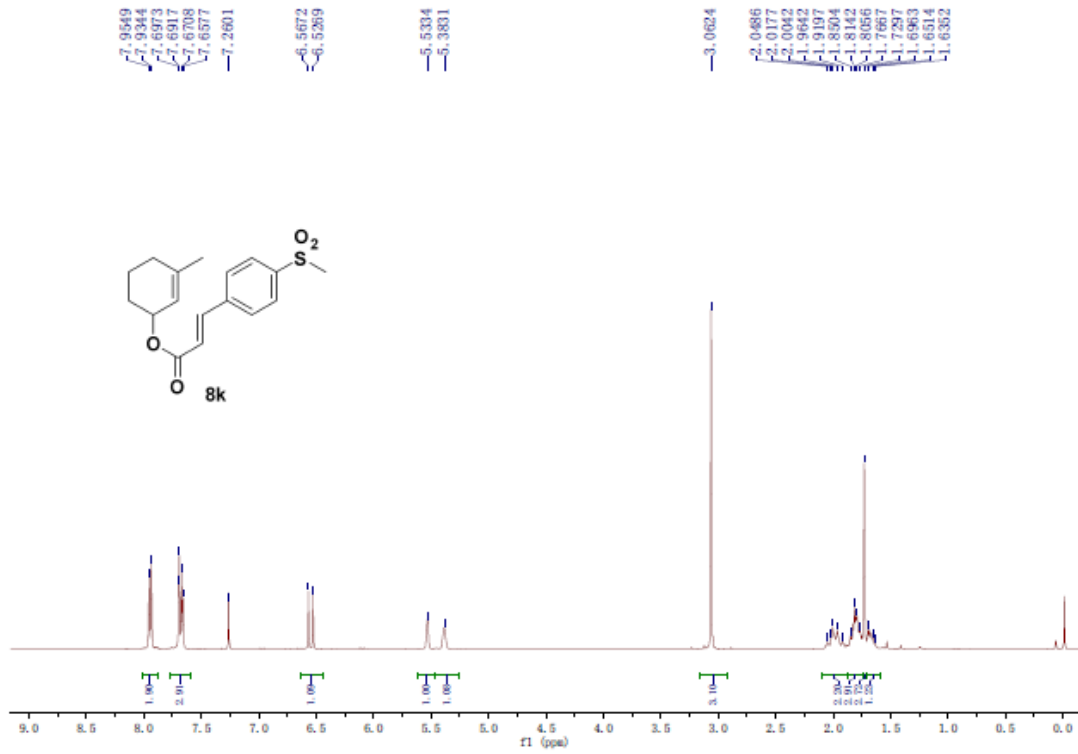

<sup>13</sup>C NMR of **8k** (100 M, CDCl<sub>3</sub>)

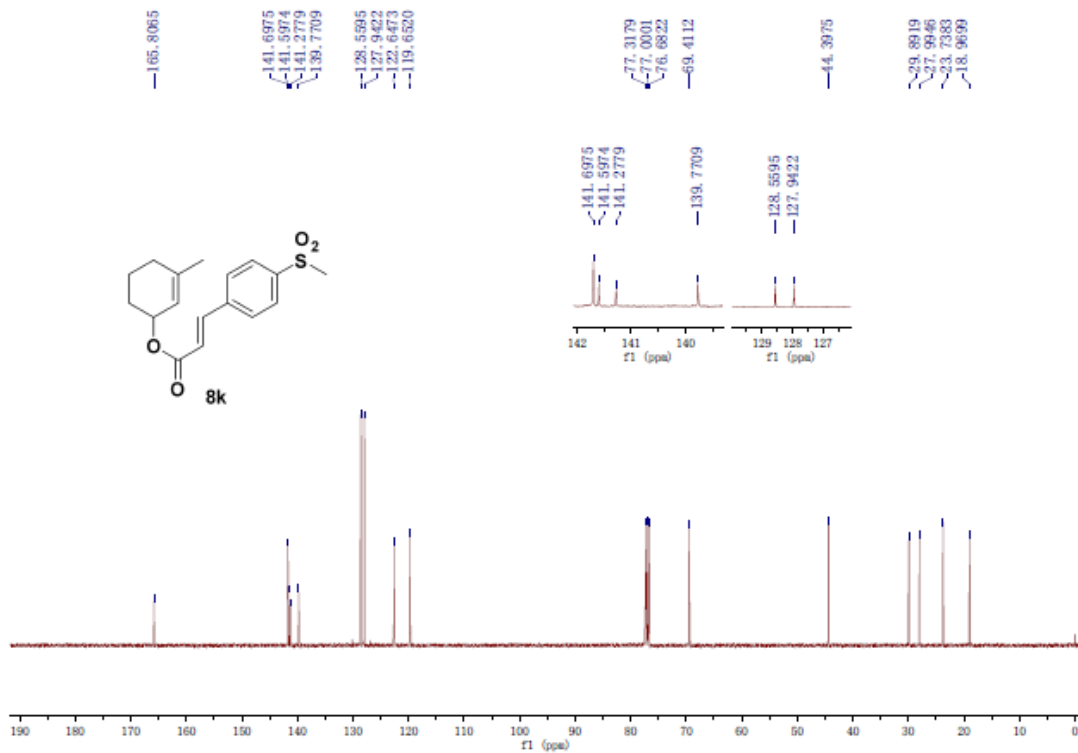

<sup>1</sup>H NMR of **8I** (400 M, CDCl<sub>3</sub>)

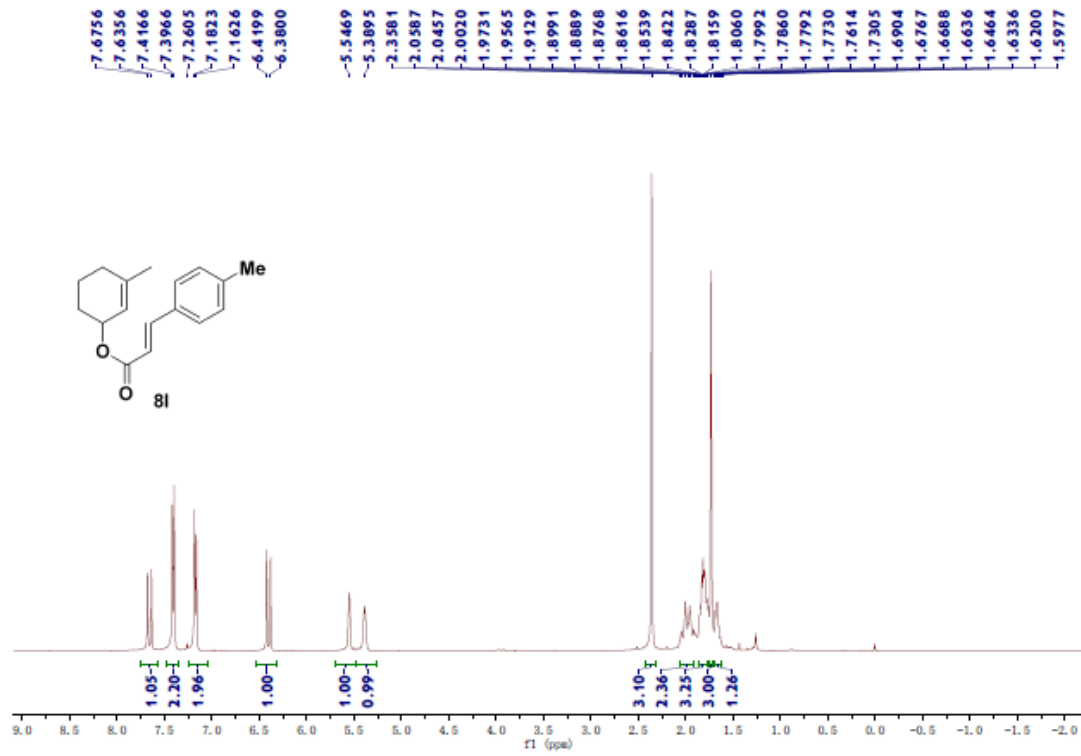

<sup>13</sup>C NMR of **8I** (100 M, CDCl<sub>3</sub>)

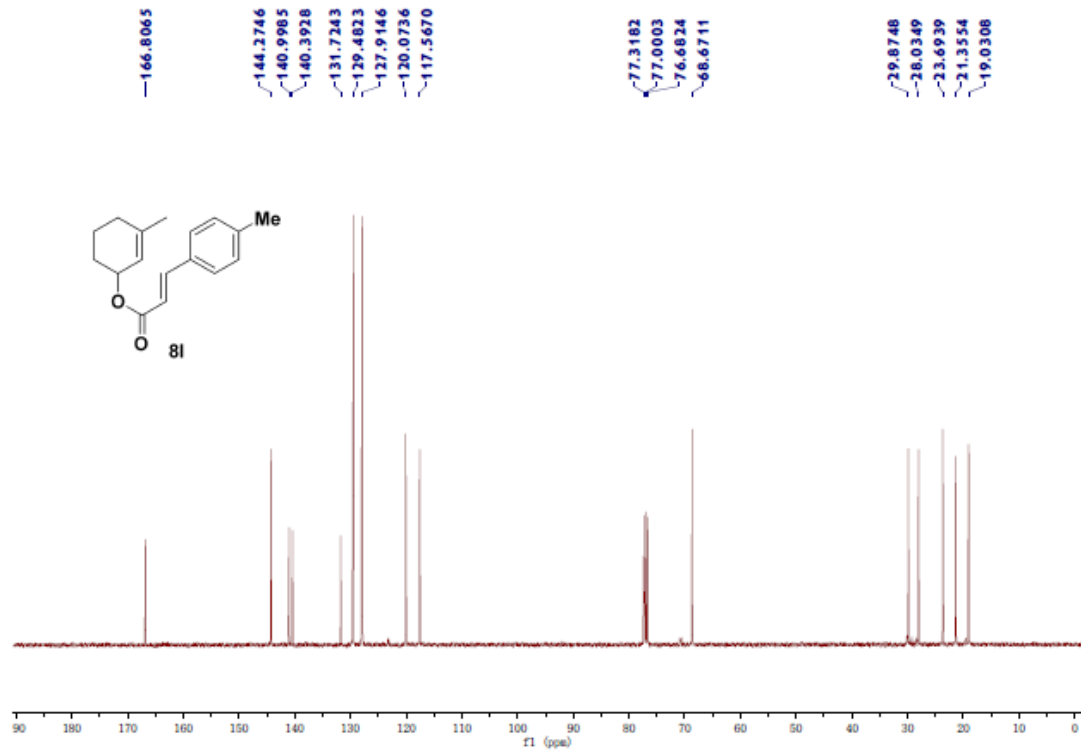

<sup>1</sup>H NMR of **8m** (400 M, CDCl<sub>3</sub>)

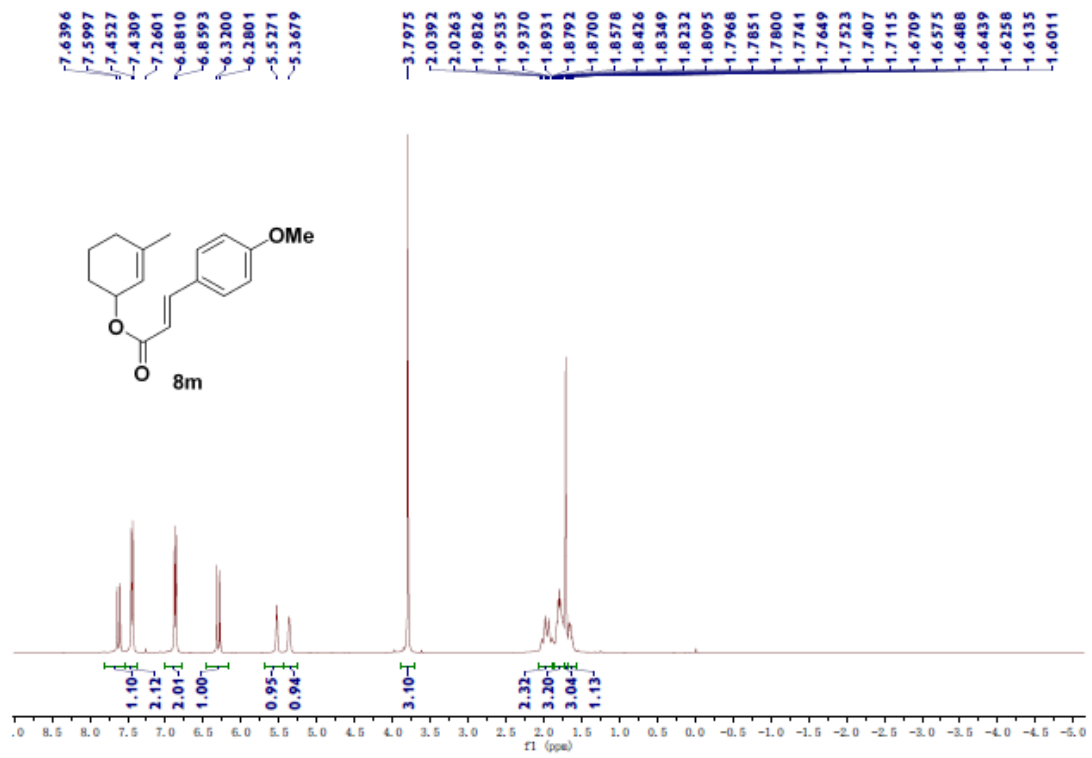

<sup>13</sup>C NMR of **8m** (150 M, CDCl<sub>3</sub>)

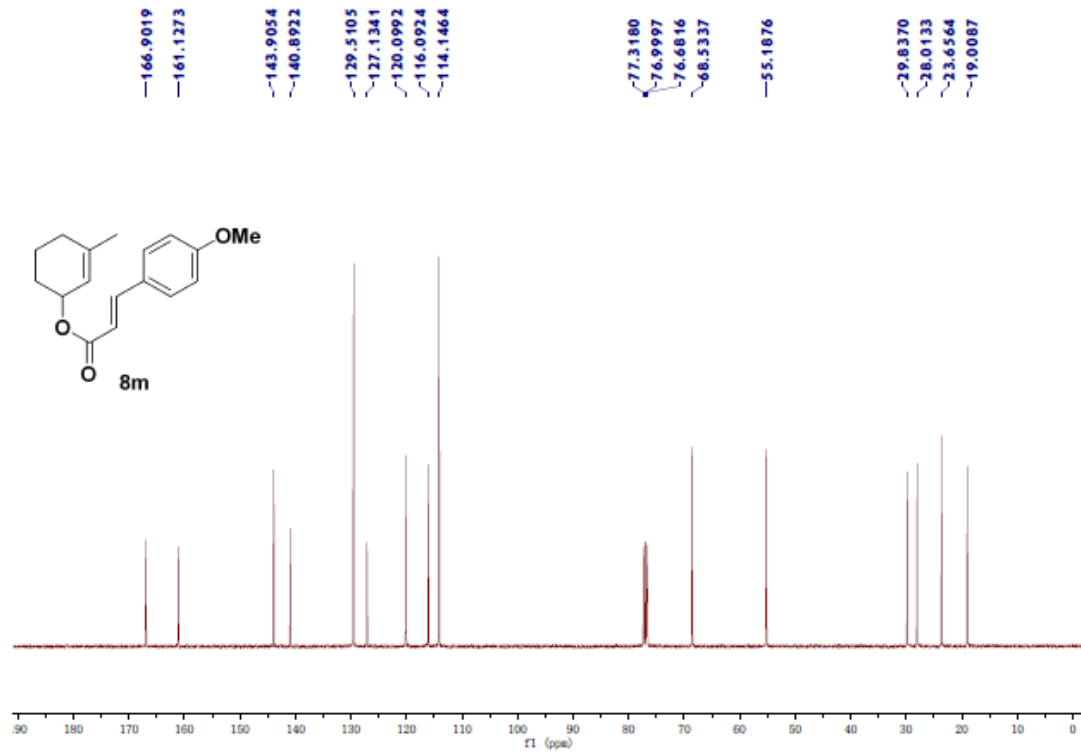



<sup>1</sup>H NMR of **8o** (400 M, CDCl<sub>3</sub>)

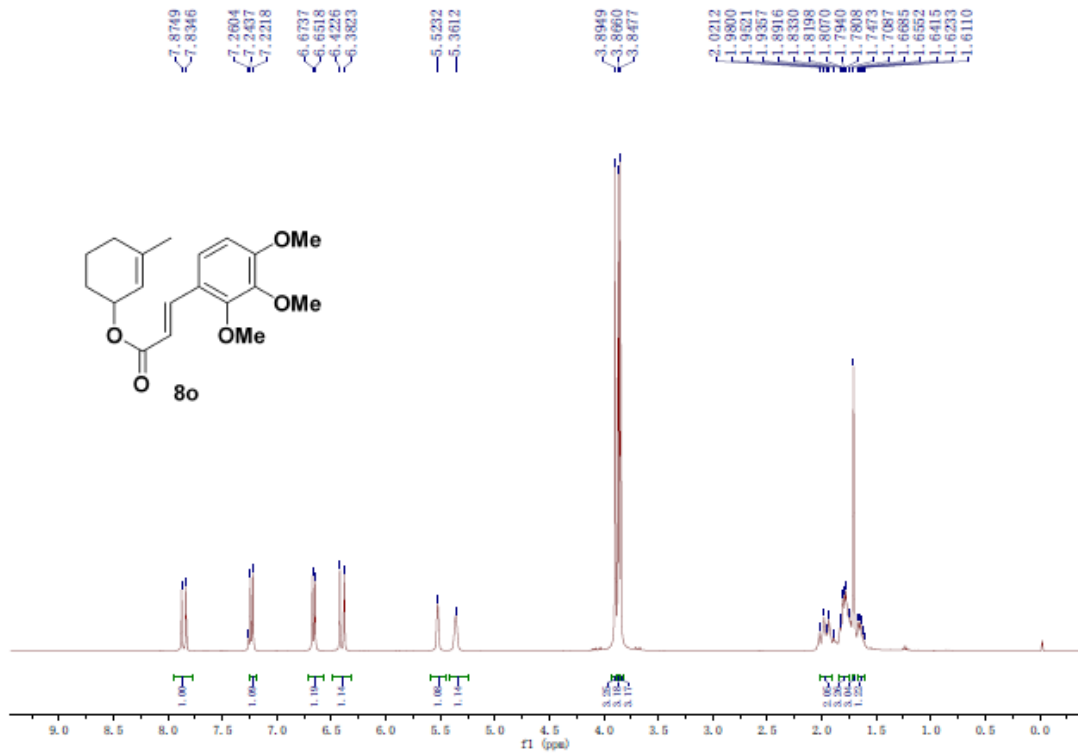

<sup>13</sup>C NMR of **8o** (100 M, CDCl<sub>3</sub>)

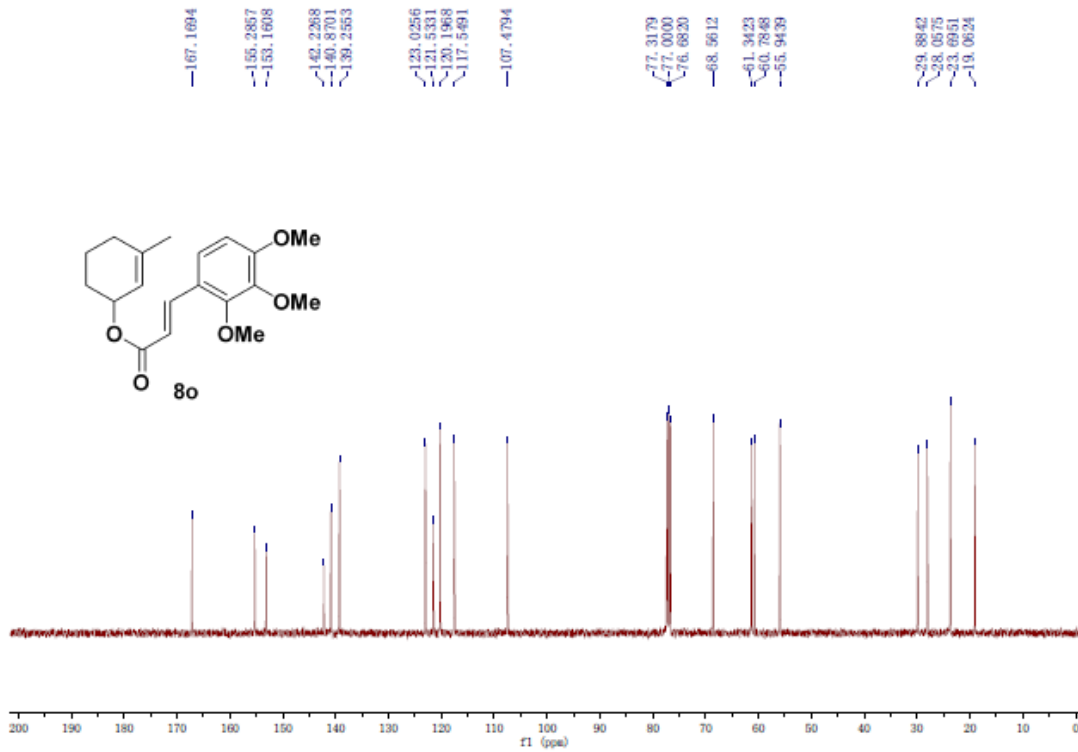



### $^1\text{H}$ NMR of **8p** (400 M, $\text{CDCl}_3$ )

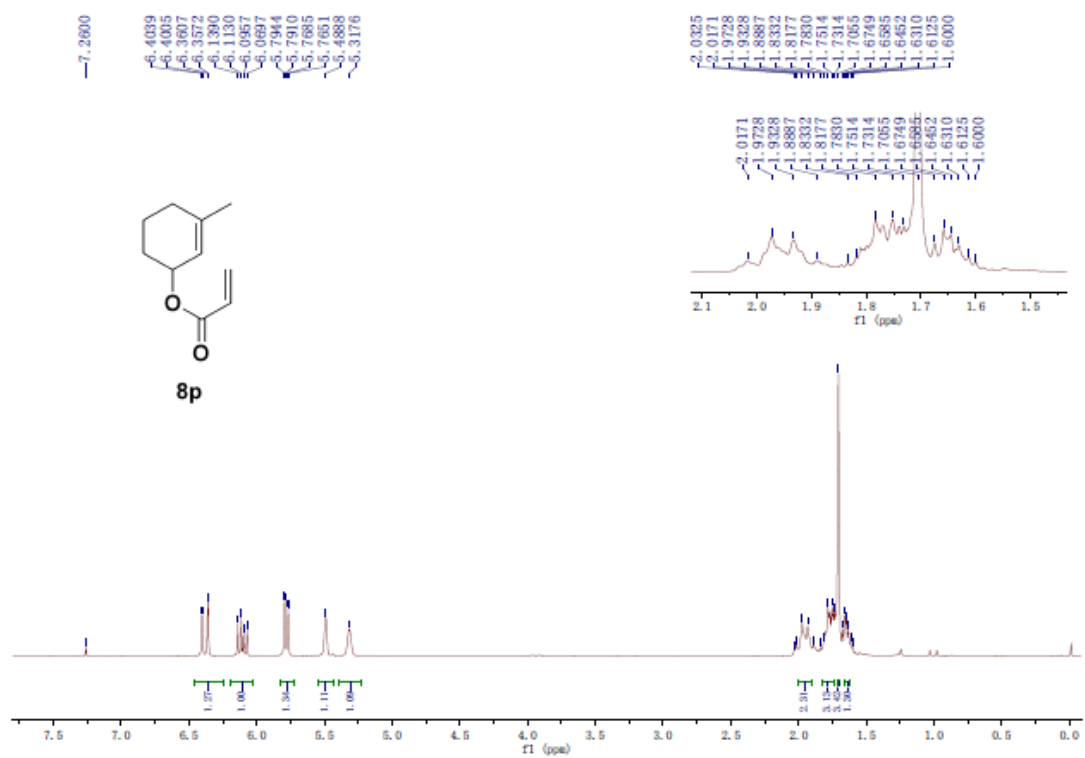



<sup>1</sup>H NMR of **8r** (400 M, CDCl<sub>3</sub>)

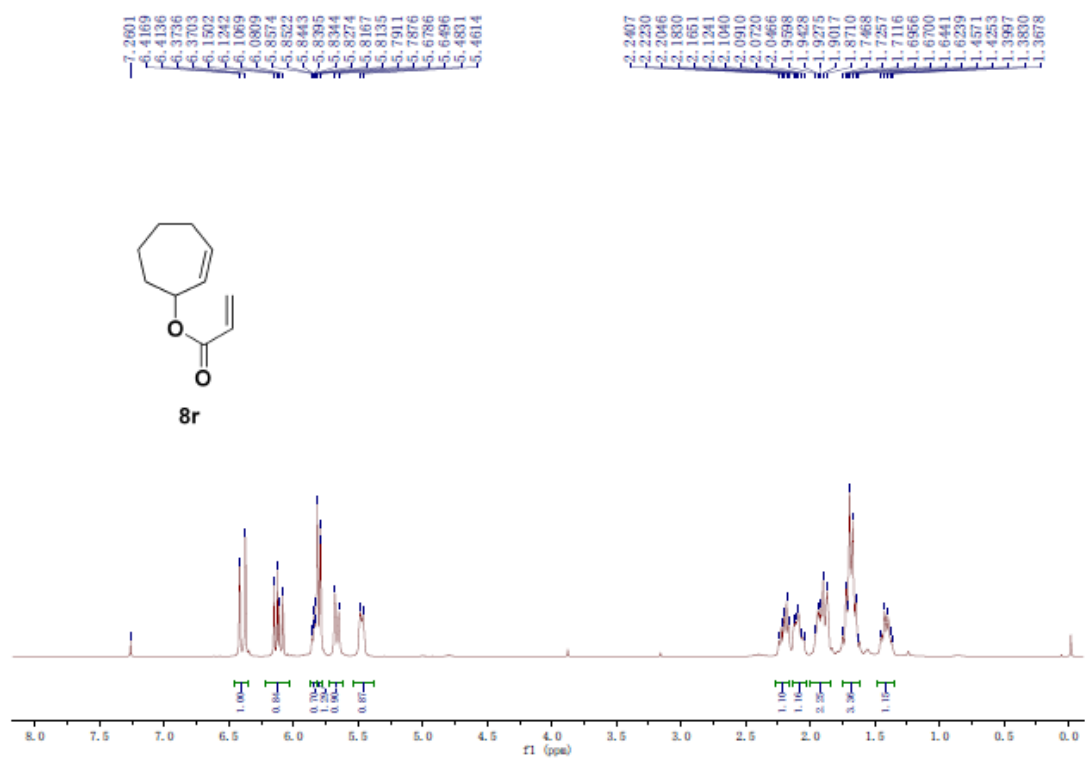

<sup>13</sup>C NMR of **8r** (100 M, CDCl<sub>3</sub>)

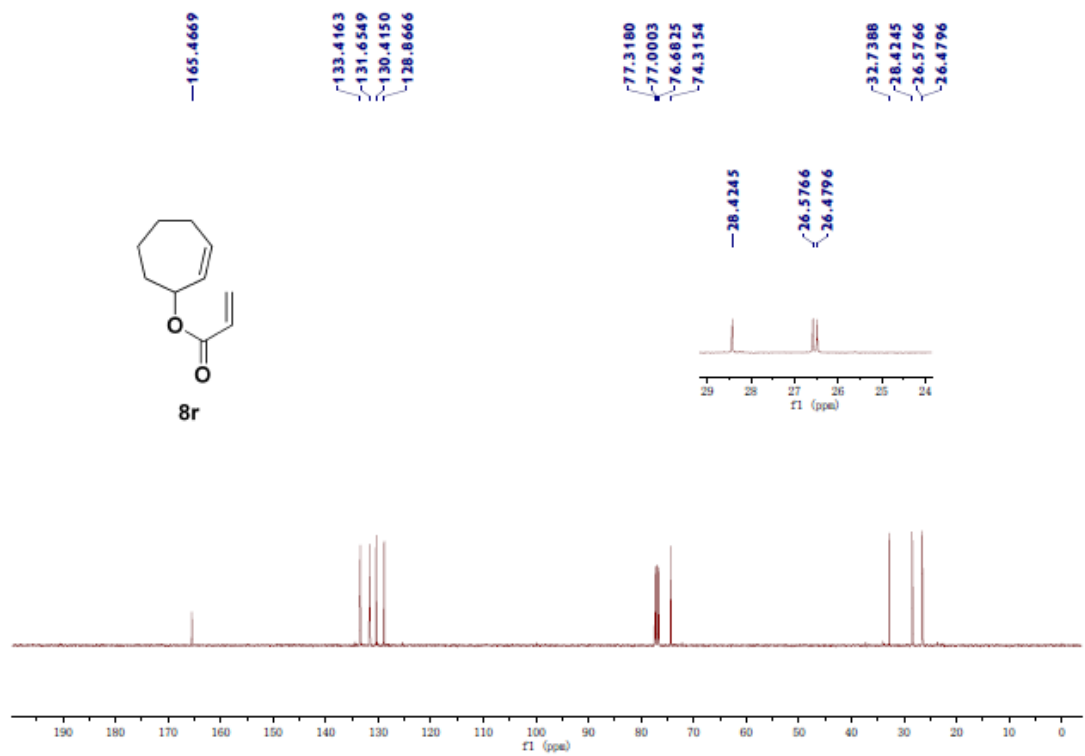

<sup>1</sup>H NMR of **8s** (600 M, CDCl<sub>3</sub>)

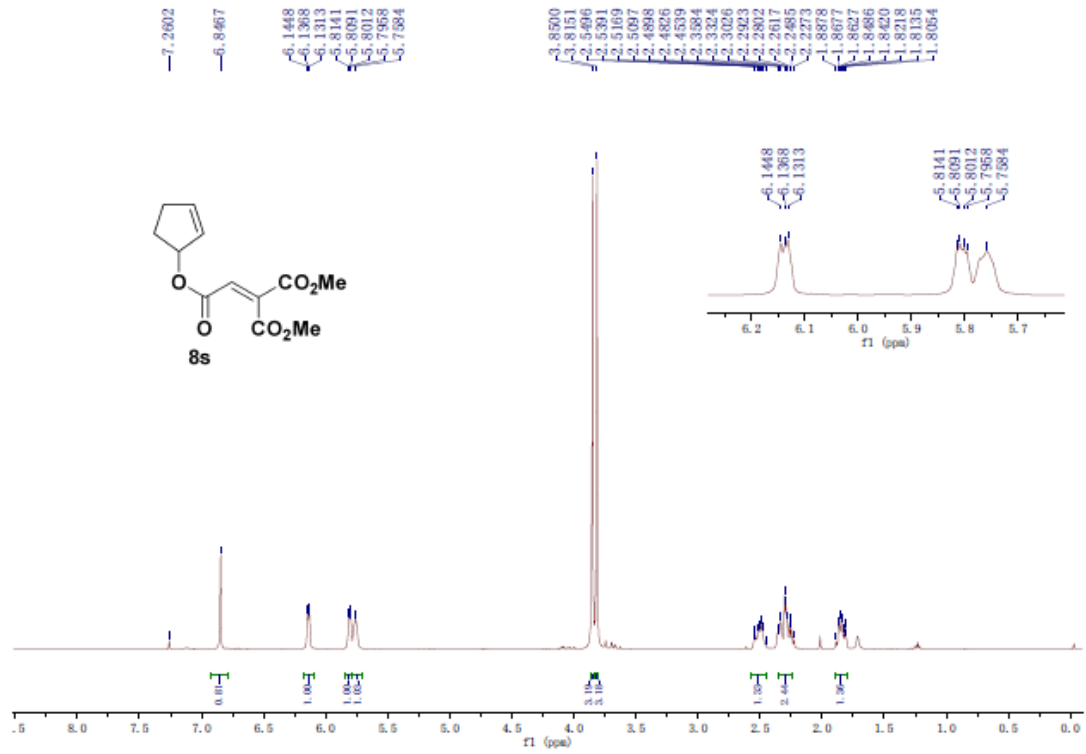

<sup>13</sup>C NMR of **8s** (150 M, CDCl<sub>3</sub>)

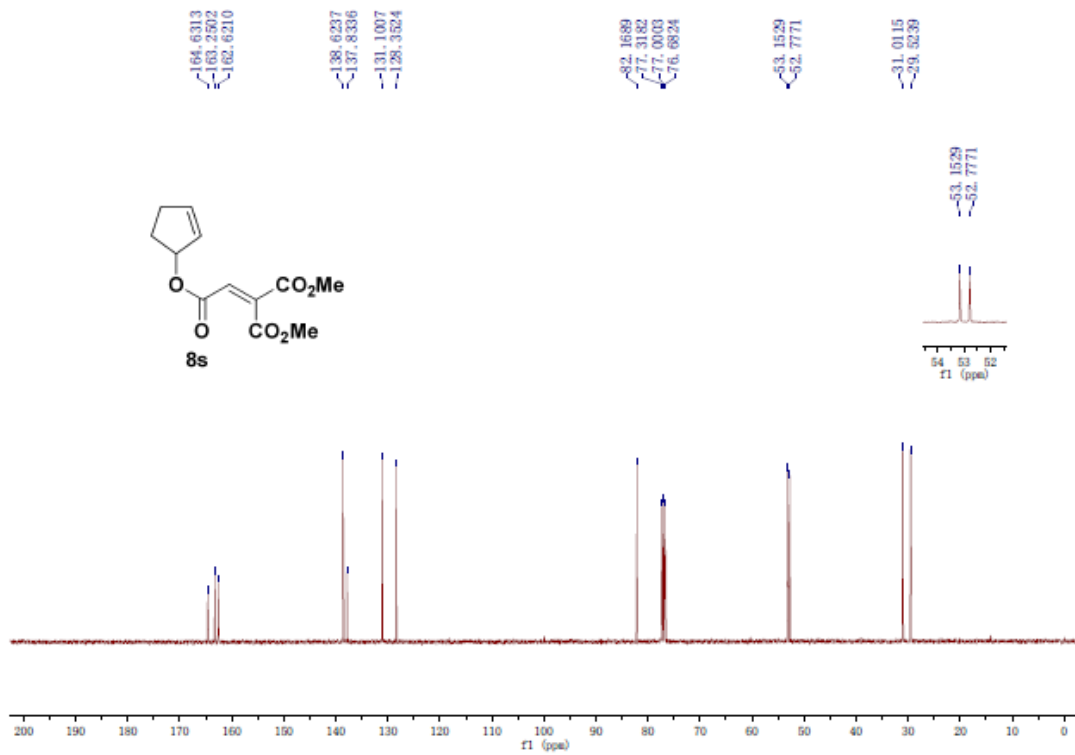

$^1\text{H}$  NMR of **8t** (400 M,  $\text{CDCl}_3$ )

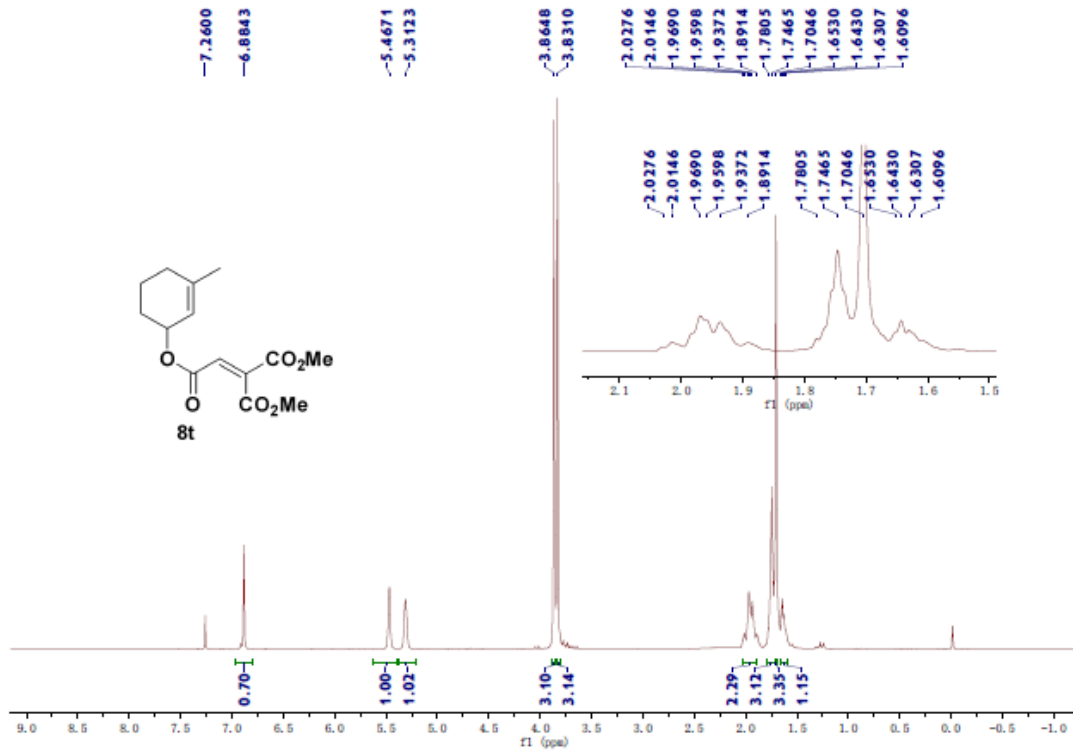

$^{13}\text{C}$  NMR of **8t** (100 M,  $\text{CDCl}_3$ )

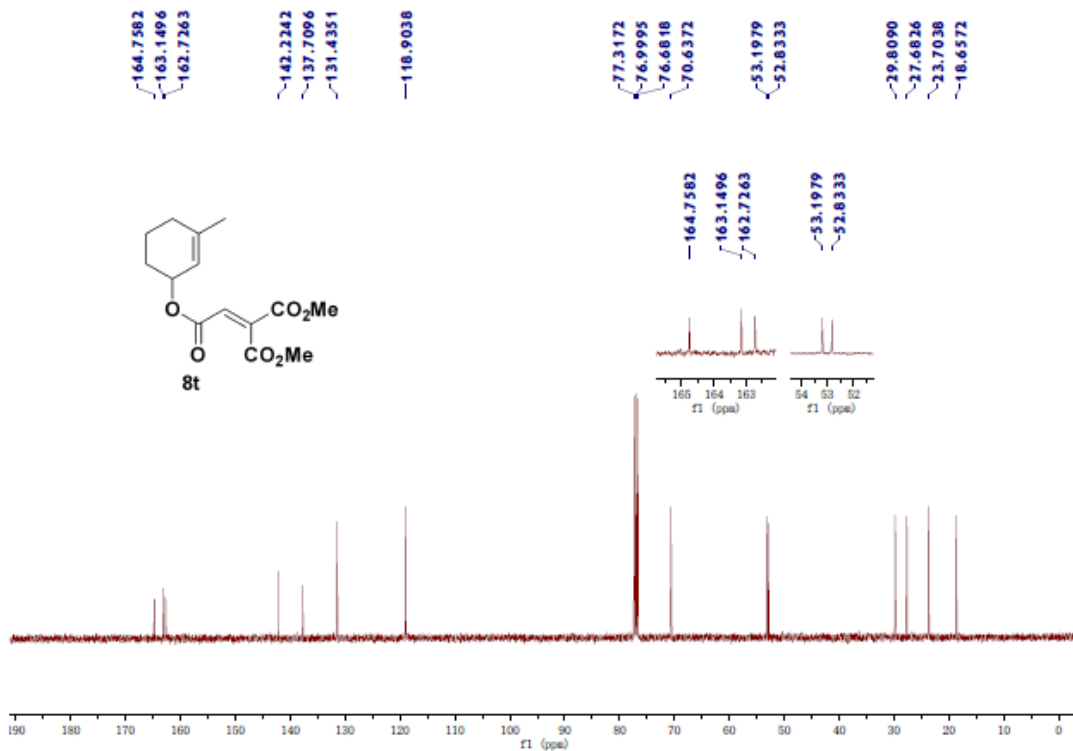



<sup>1</sup>H NMR of **8v** (400 M, CDCl<sub>3</sub>)

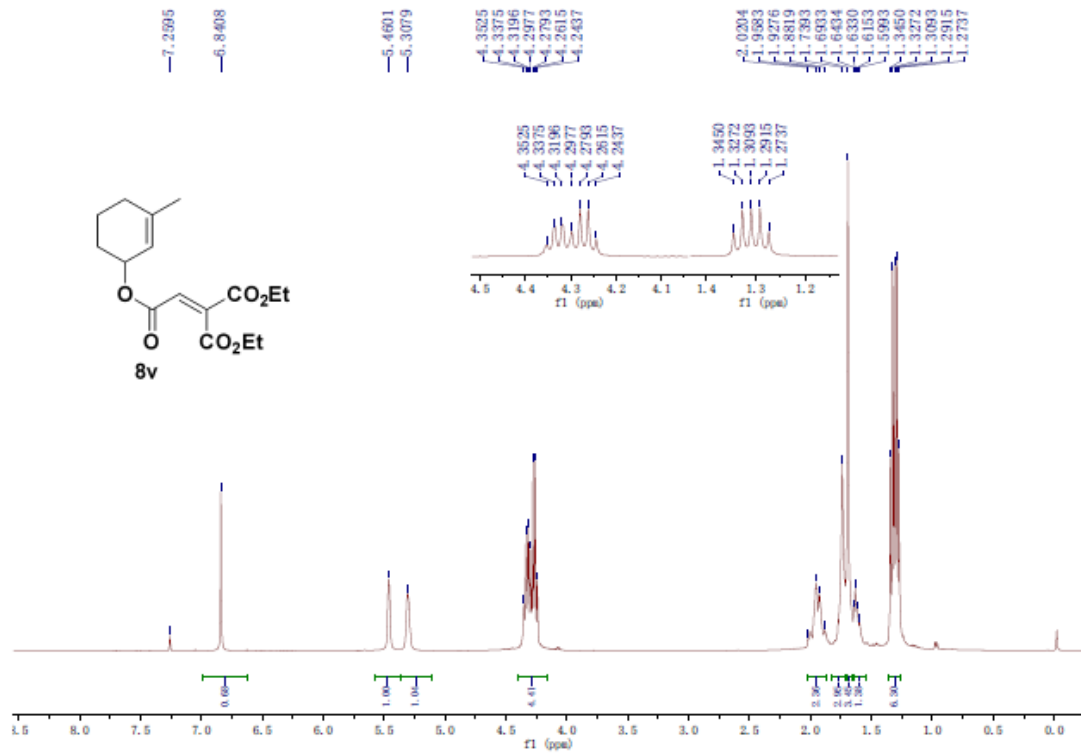

<sup>13</sup>C NMR of **8v** (100 M, CDCl<sub>3</sub>)

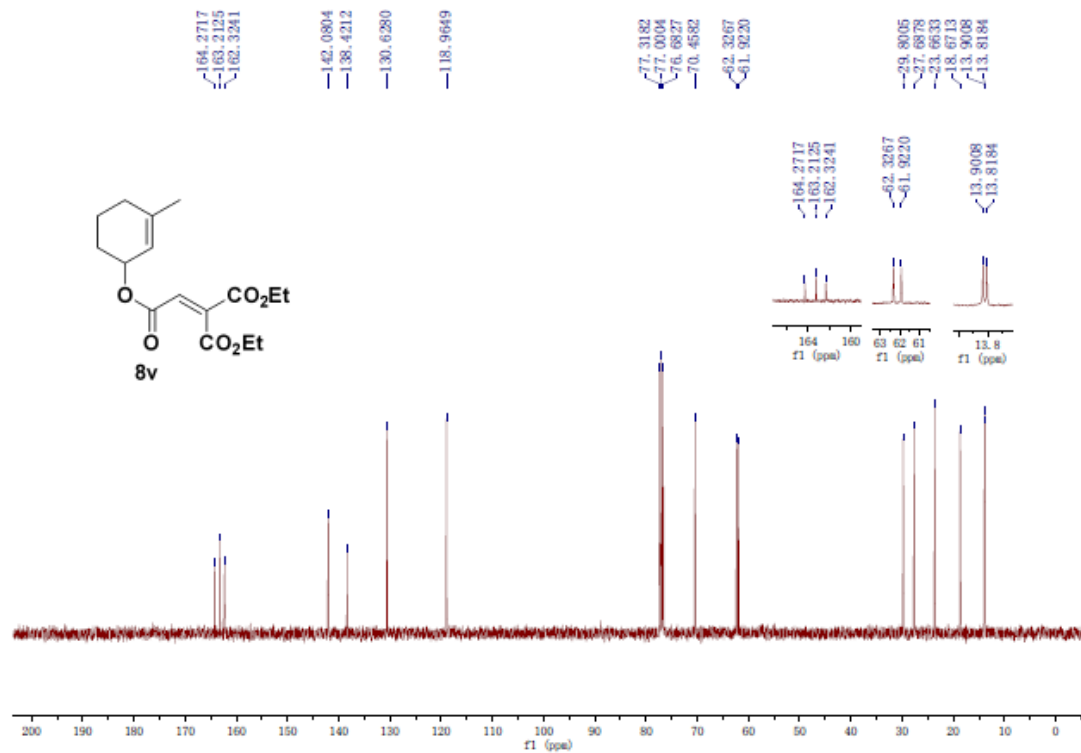

<sup>1</sup>H NMR of **D-8p1** (400 M, CDCl<sub>3</sub>)

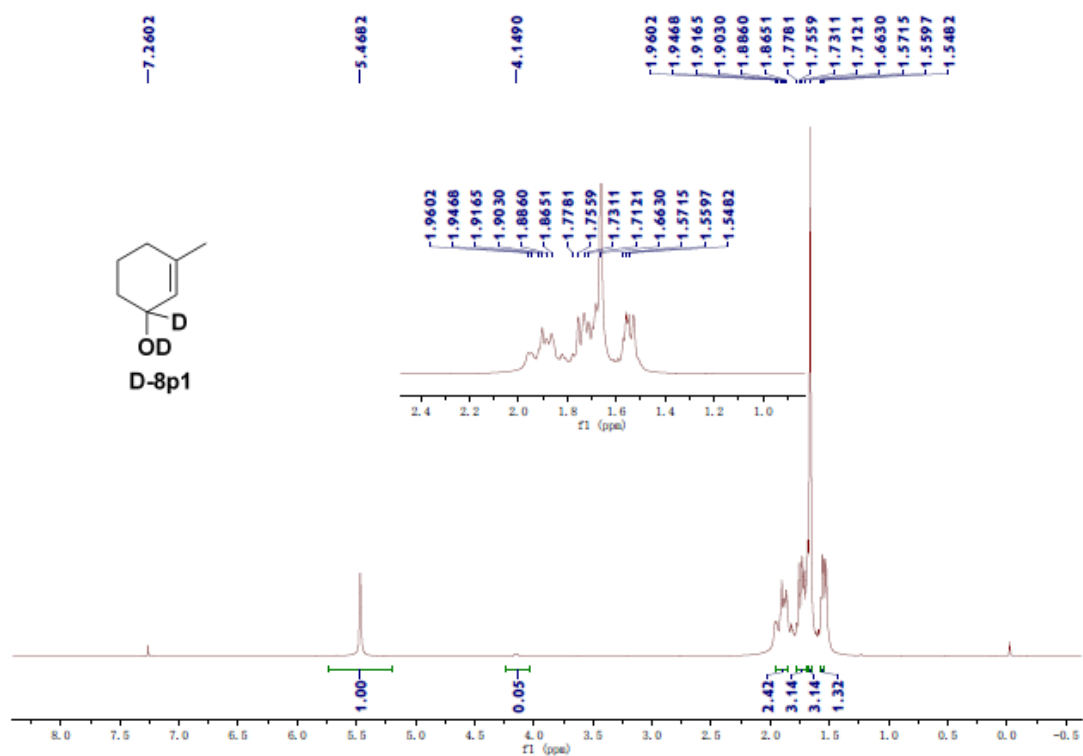

<sup>13</sup>C NMR of **D-8p1** (100 M, CDCl<sub>3</sub>)

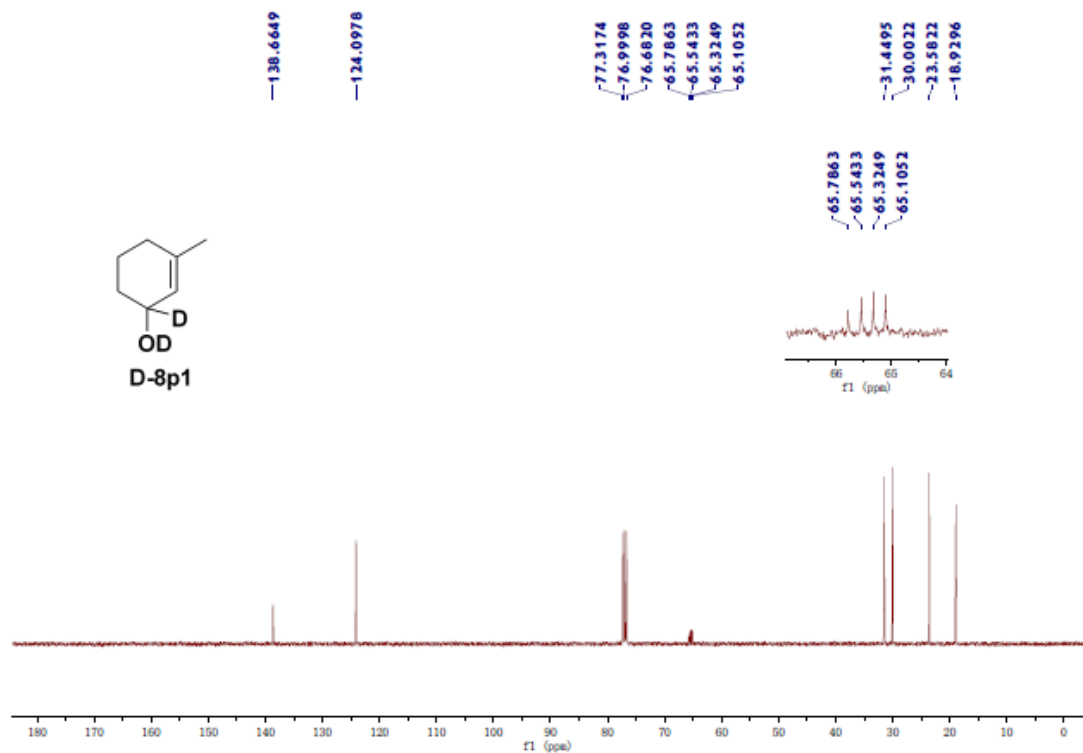



<sup>1</sup>H NMR of **D-8p** (400 M, CDCl<sub>3</sub>)

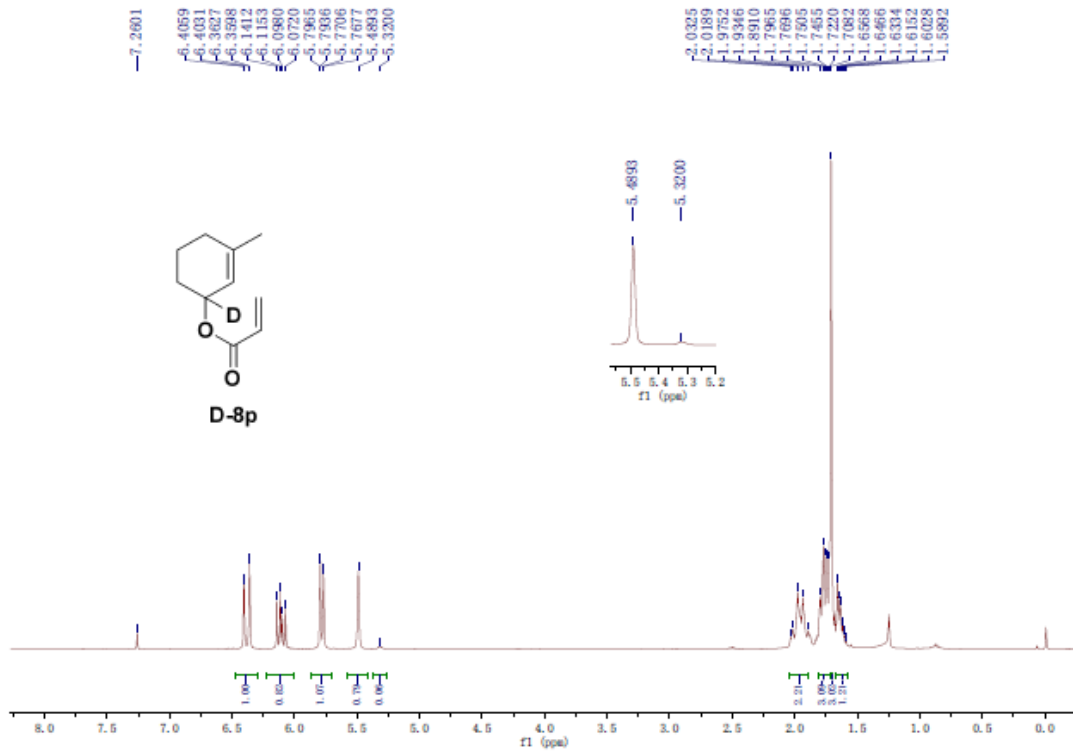

<sup>13</sup>C NMR of **D-8p** (100 M, CDCl<sub>3</sub>)

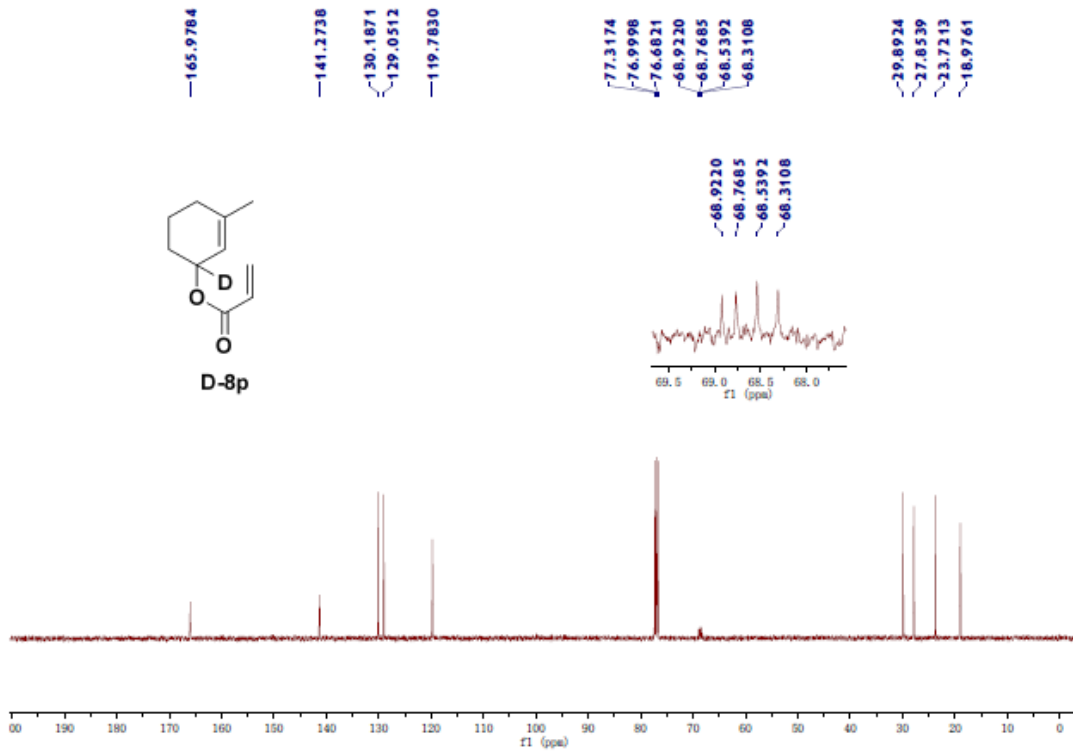

<sup>1</sup>H NMR of **D-8j** (400 M, CDCl<sub>3</sub>)

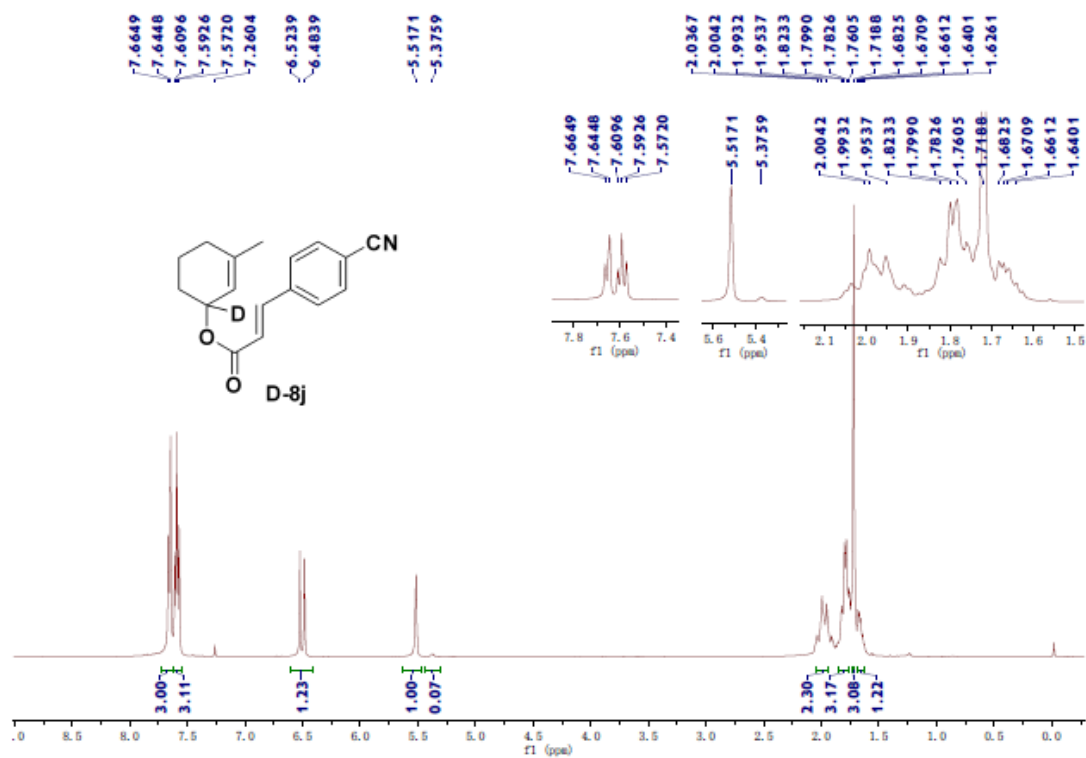

<sup>13</sup>C NMR of **D-8j** (100 M, CDCl<sub>3</sub>)

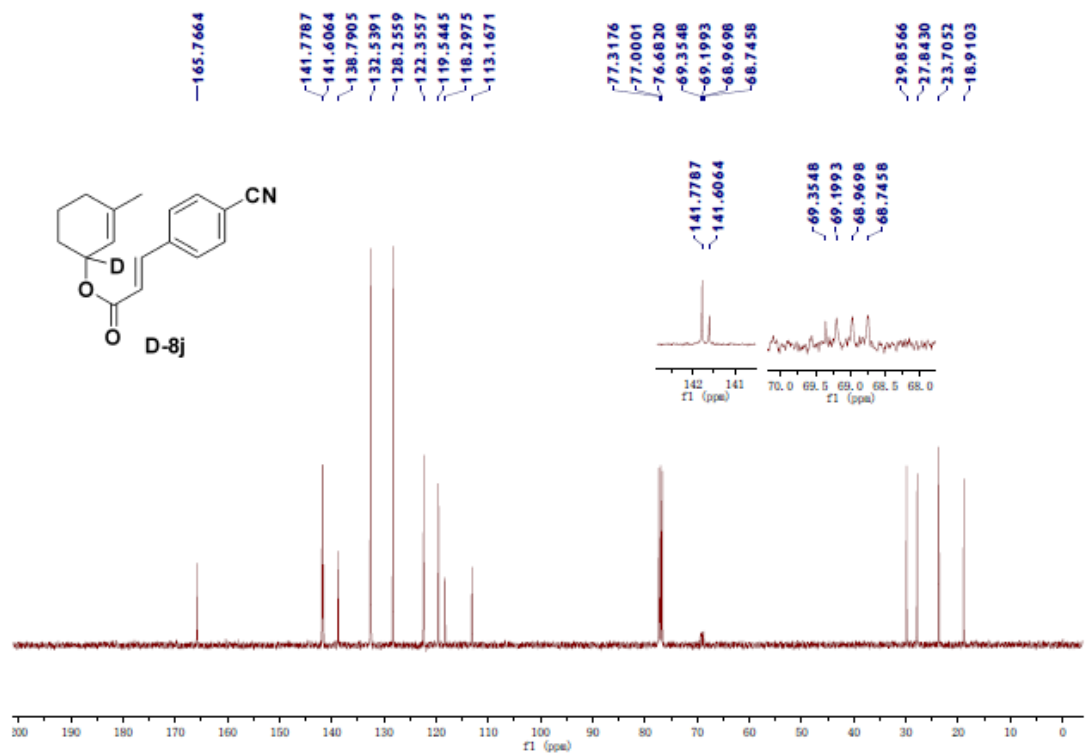

<sup>1</sup>H NMR of **10** (400 M, CDCl<sub>3</sub>)

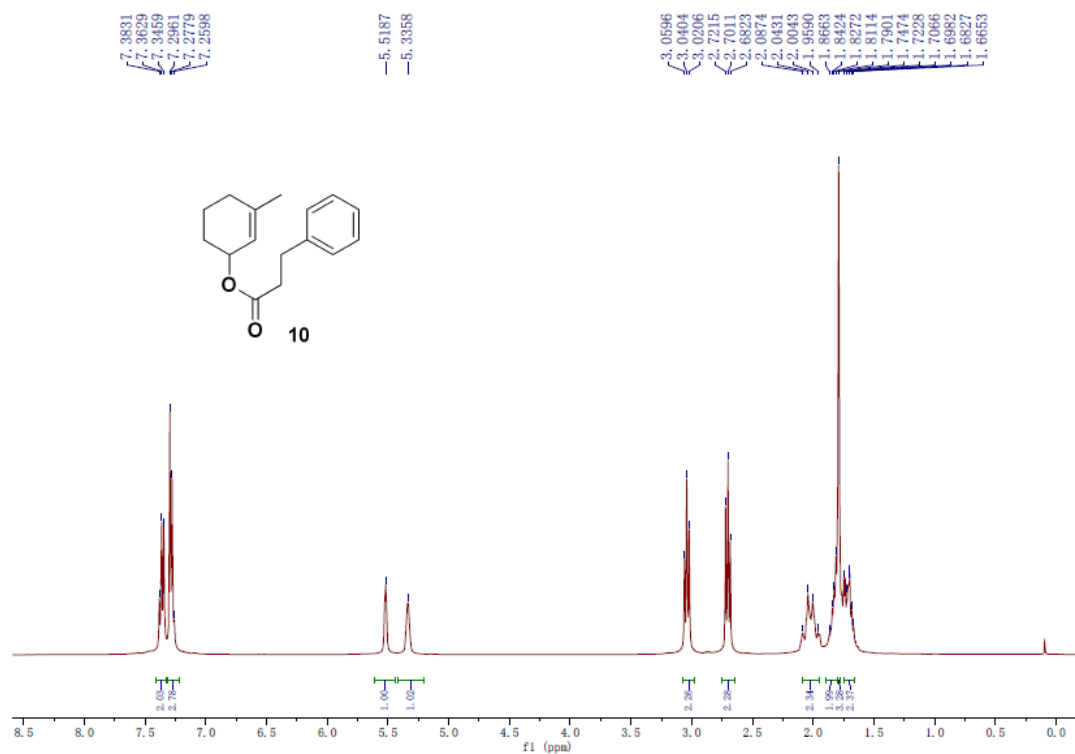

<sup>13</sup>C NMR of **10** (100 M, CDCl<sub>3</sub>)

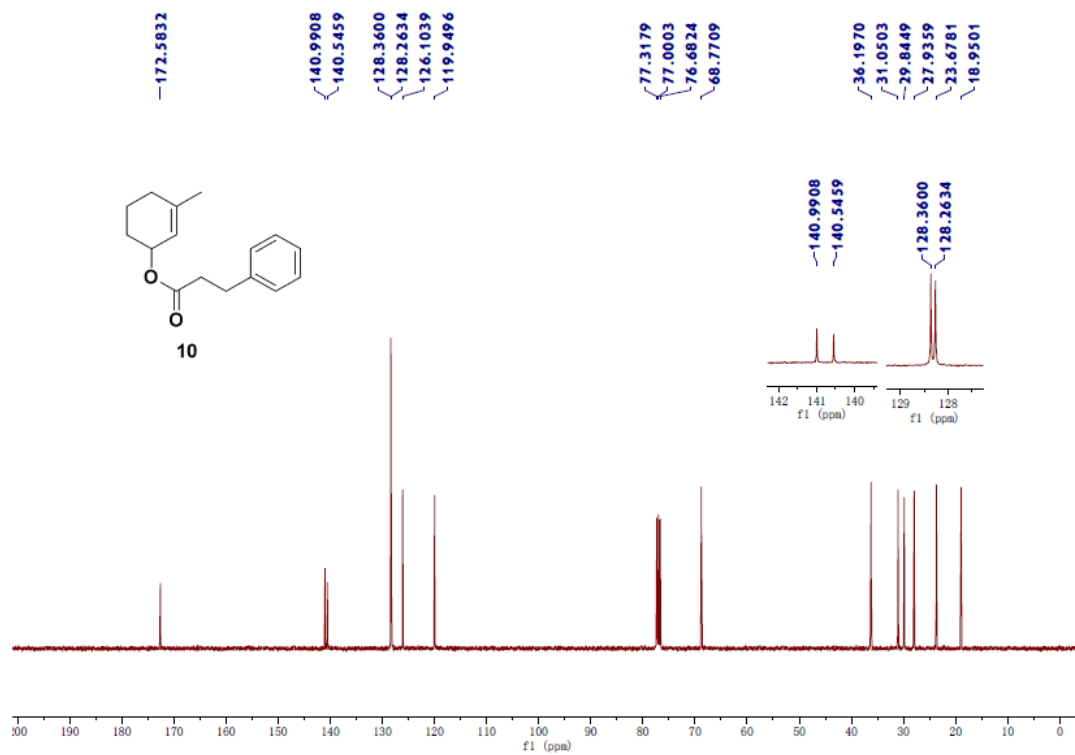

<sup>1</sup>H NMR of **11** (400 M, CDCl<sub>3</sub>)

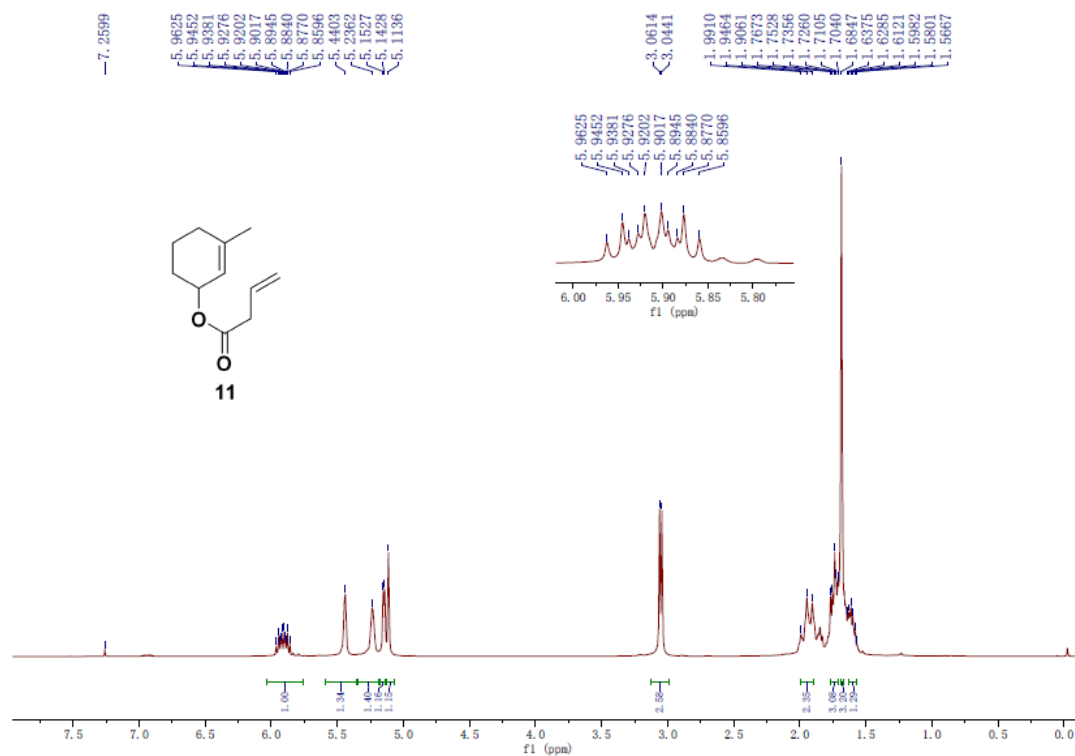

<sup>13</sup>C NMR of **11** (100 M, CDCl<sub>3</sub>)

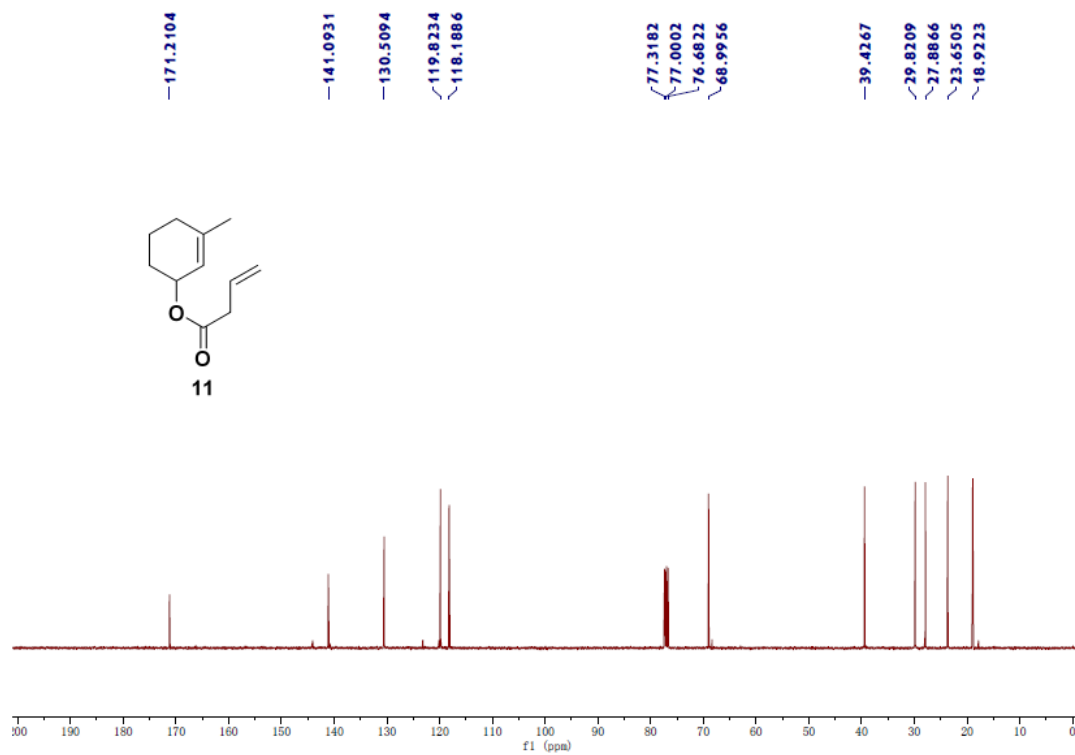

<sup>1</sup>H NMR of **12** (400 M, CDCl<sub>3</sub>)

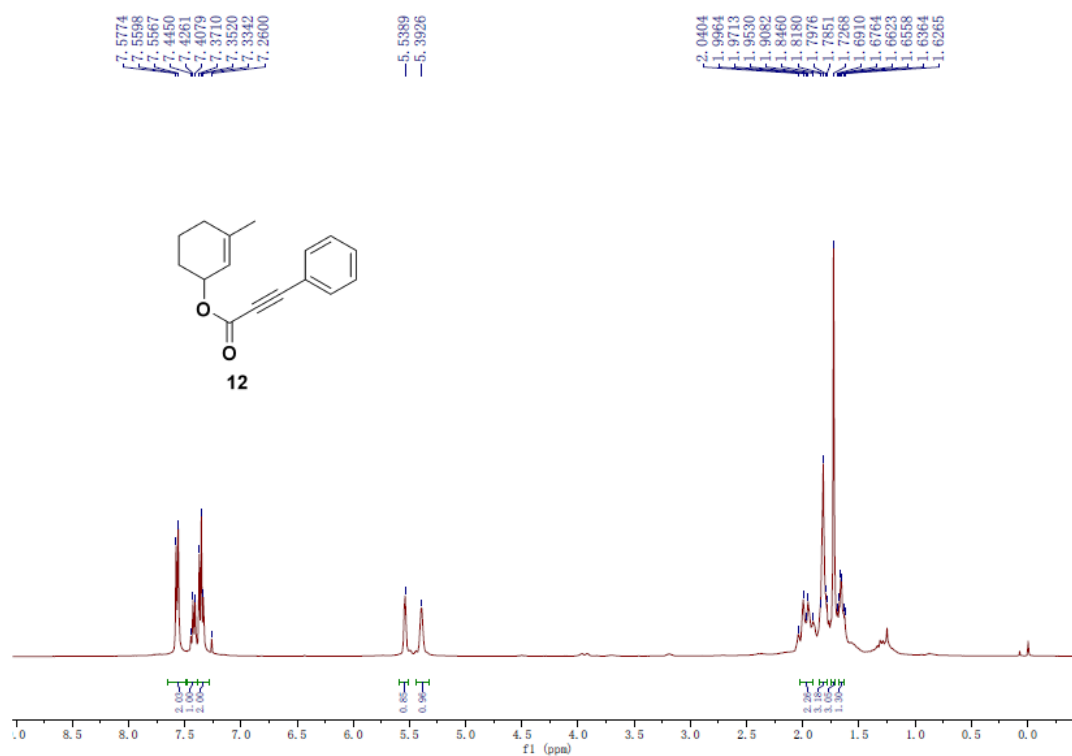

<sup>13</sup>C NMR of **12** (100 M, CDCl<sub>3</sub>)

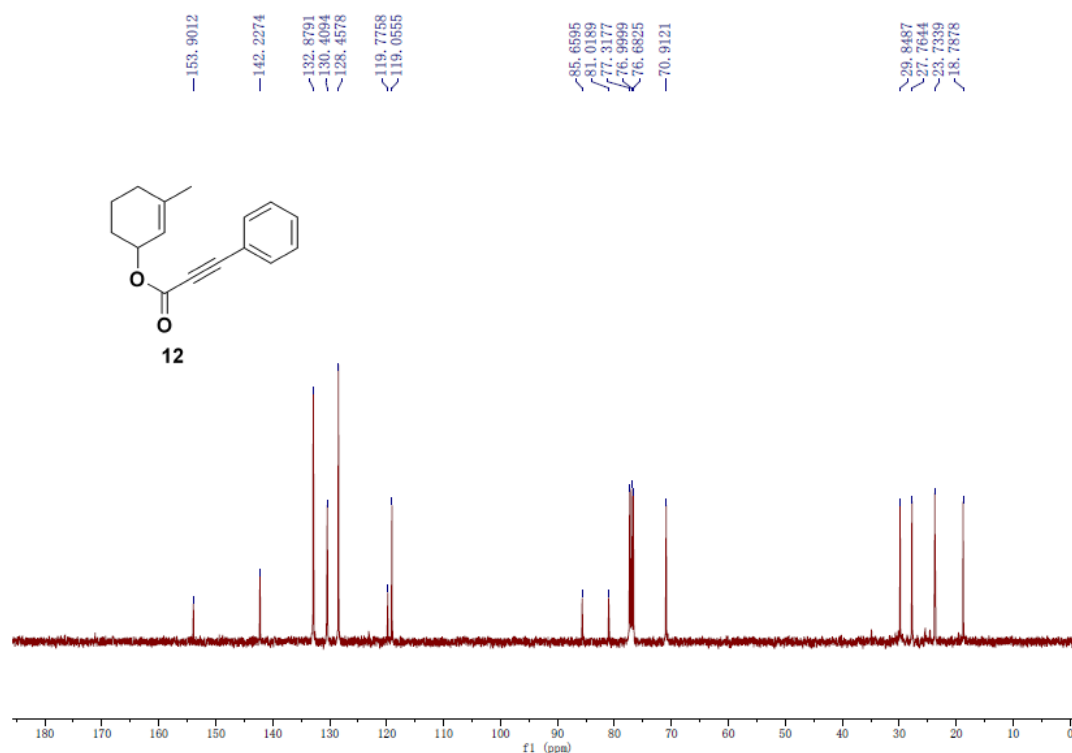

<sup>1</sup>H NMR of **13** (600 M, CDCl<sub>3</sub>)

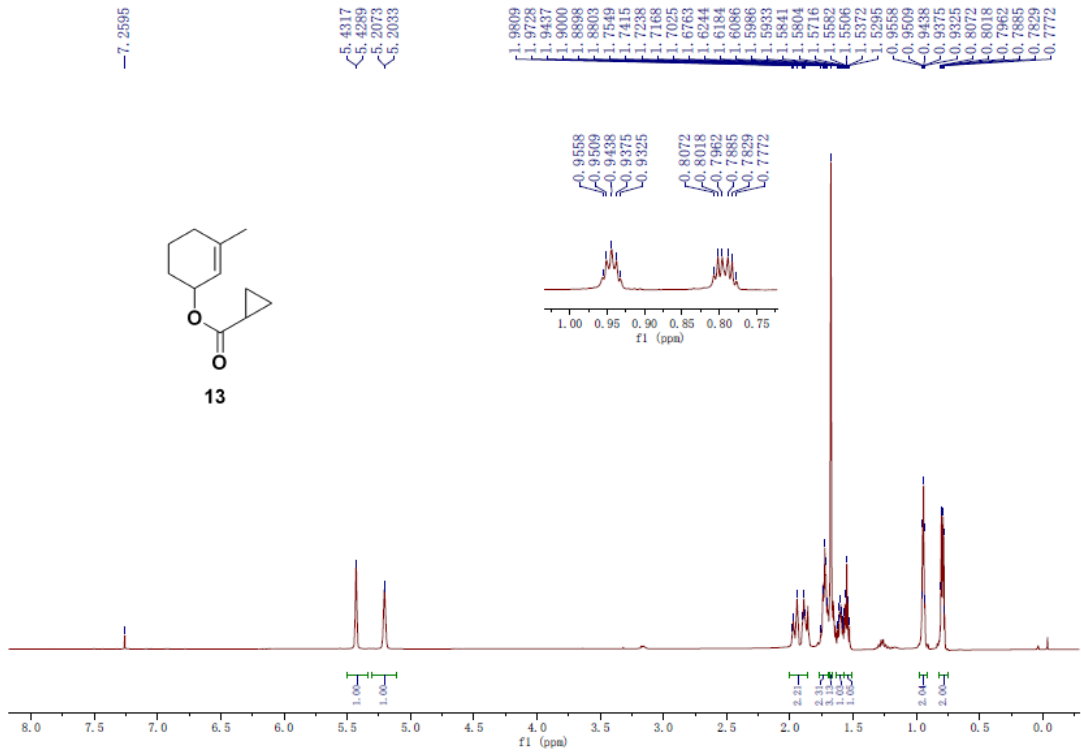

<sup>13</sup>C NMR of **13** (150 M, CDCl<sub>3</sub>)

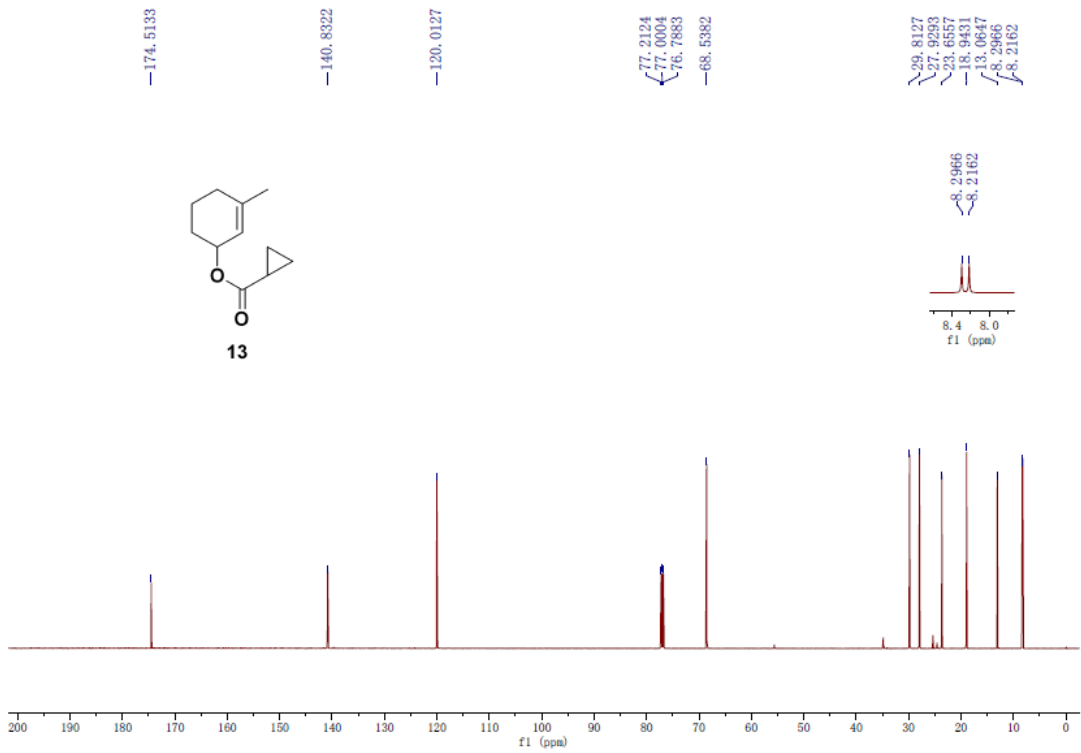

<sup>1</sup>H NMR of **14** (600 M, CDCl<sub>3</sub>)

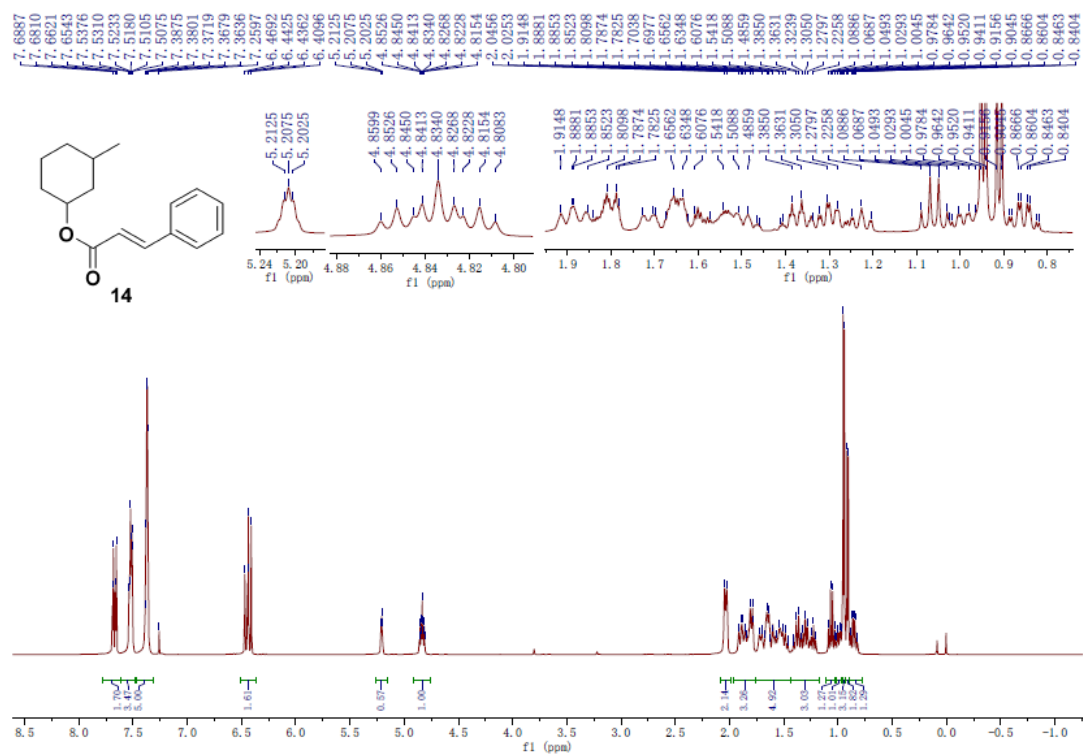

<sup>13</sup>C NMR of **14** (150 M, CDCl<sub>3</sub>)

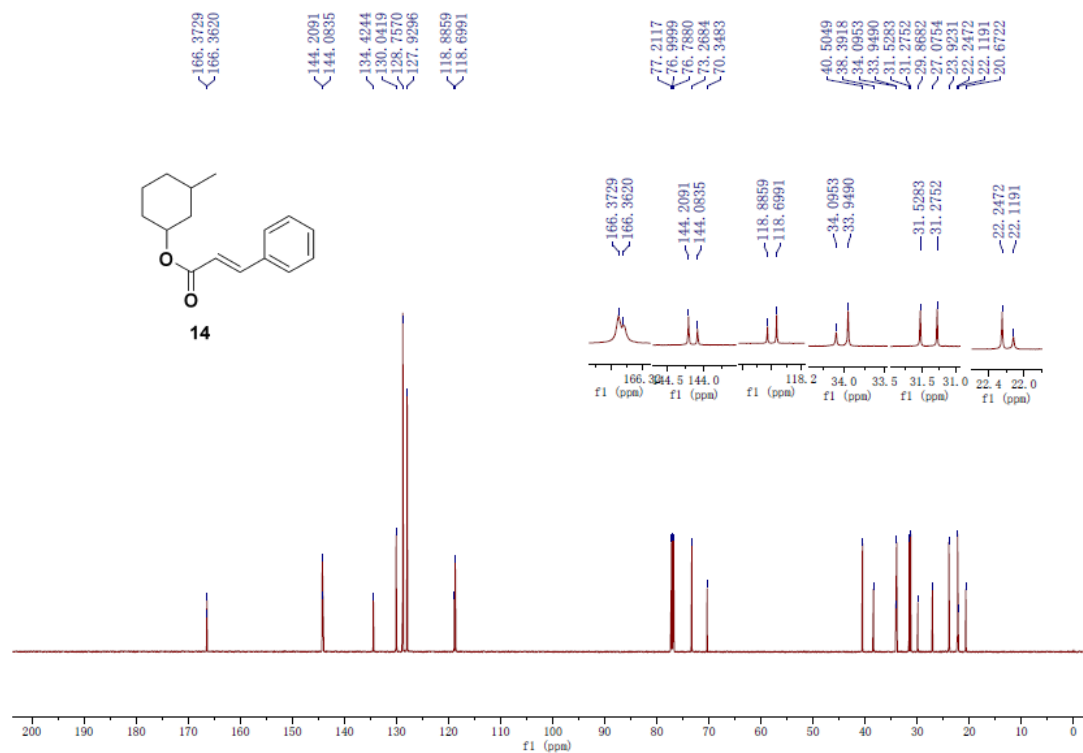





### <sup>1</sup>H NMR of **16** (400 M, CDCl<sub>3</sub>)

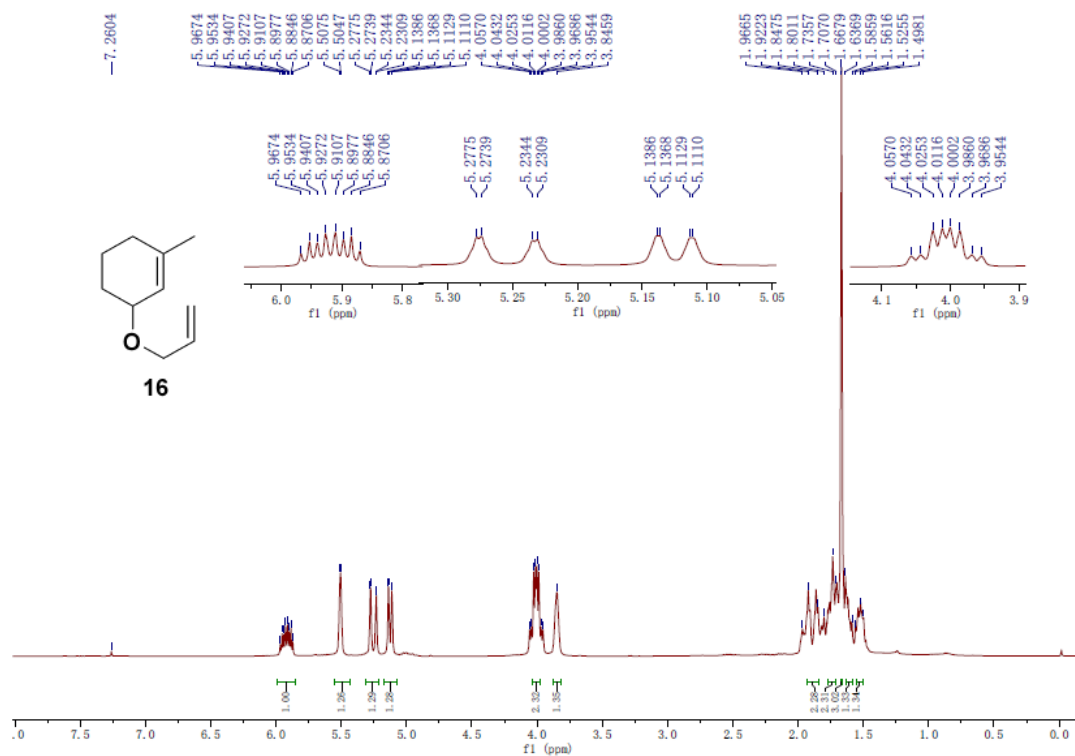

### $^1\text{H}$ NMR of **17** (400 M, $\text{CDCl}_3$ )

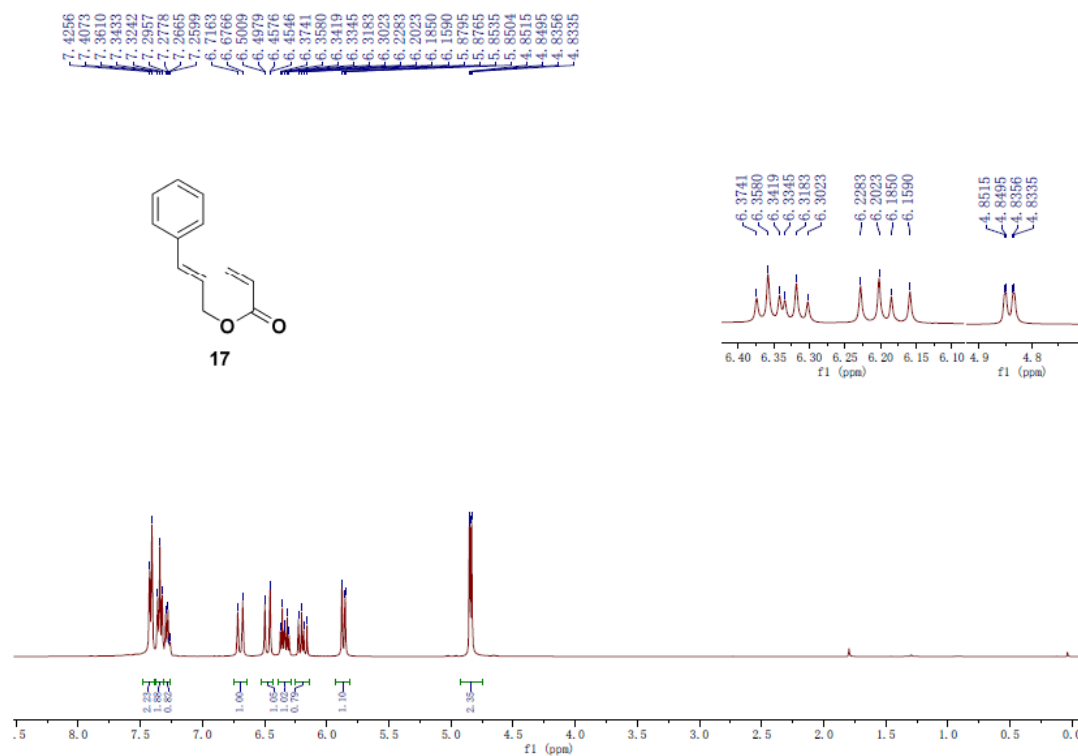

### $^{13}\text{C}$ NMR of **17** (100 M, $\text{CDCl}_3$ )

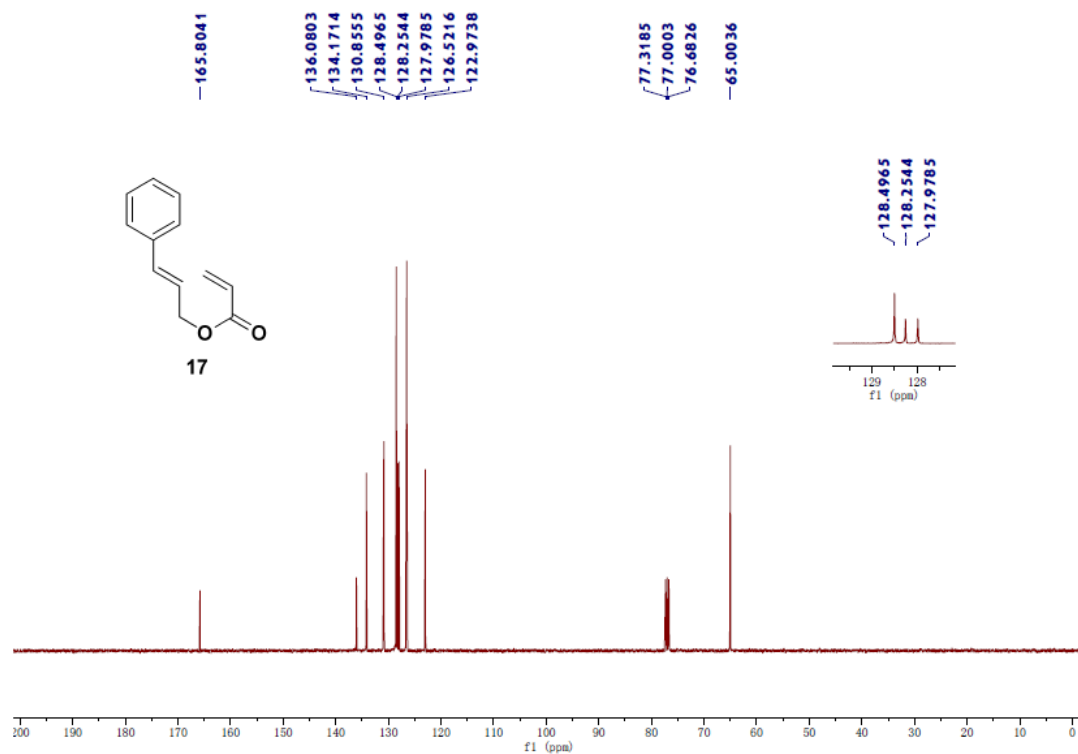



<sup>1</sup>H NMR of (±)-**9b** (600 M, CDCl<sub>3</sub>)

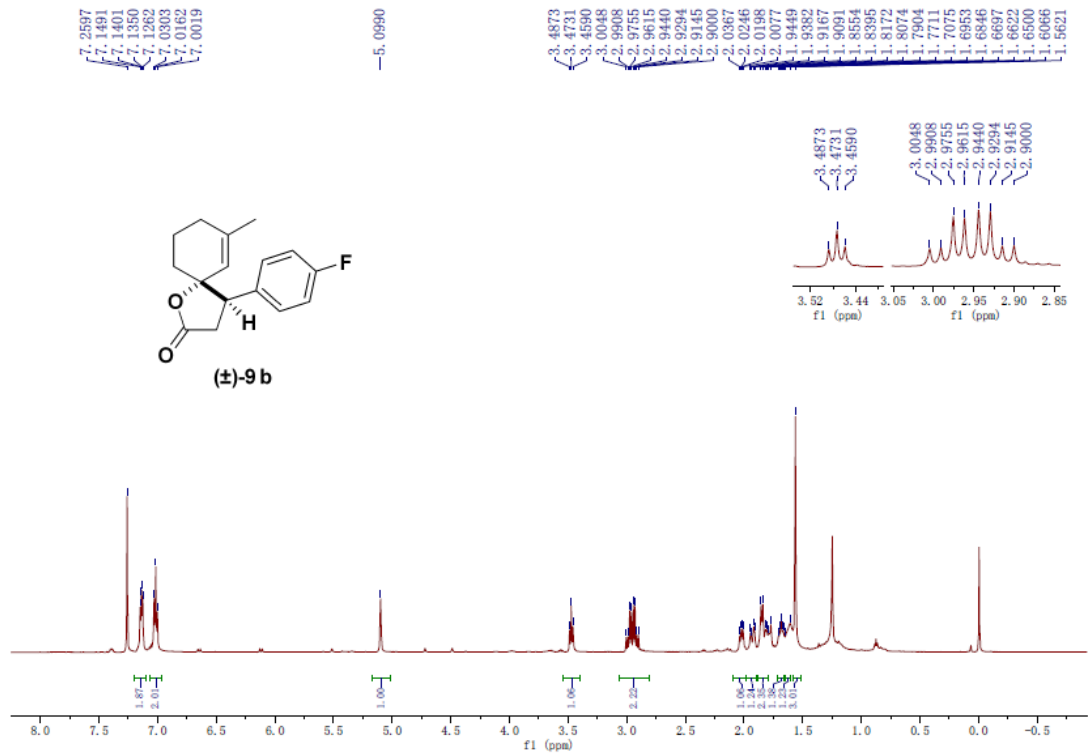

<sup>13</sup>C NMR of (±)-**9b** (150 M, CDCl<sub>3</sub>)

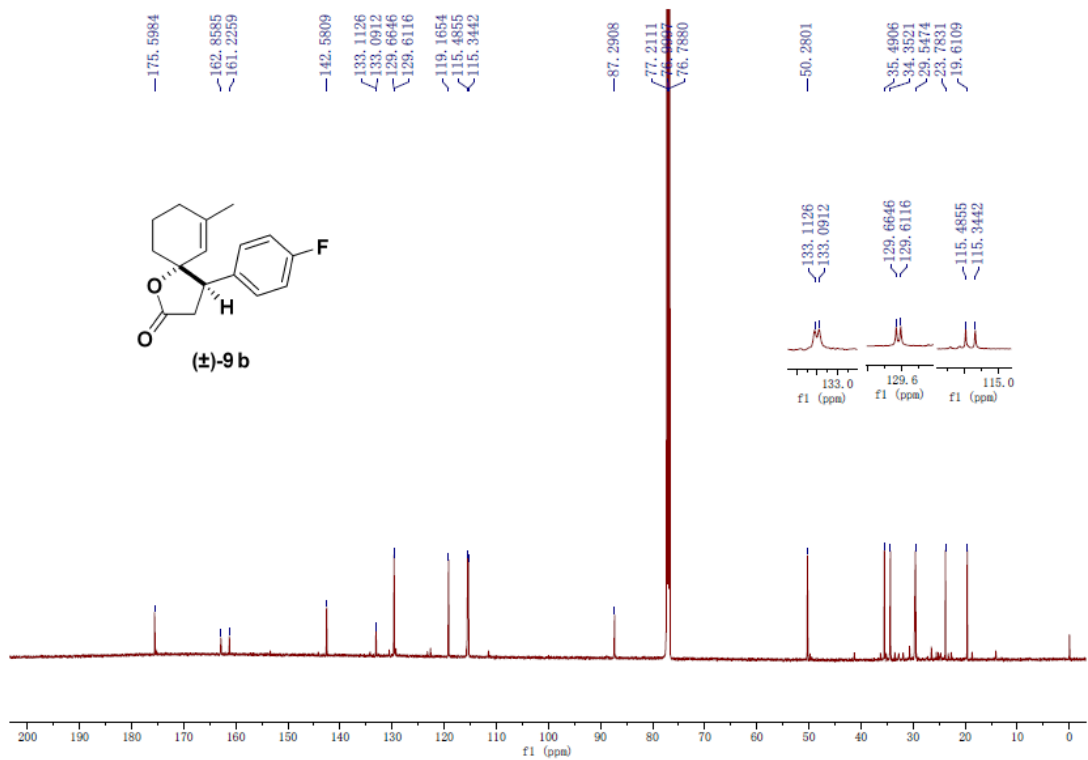

$^{19}\text{F}$  NMR of ( $\pm$ )-**9b** (565 M,  $\text{CDCl}_3$ )

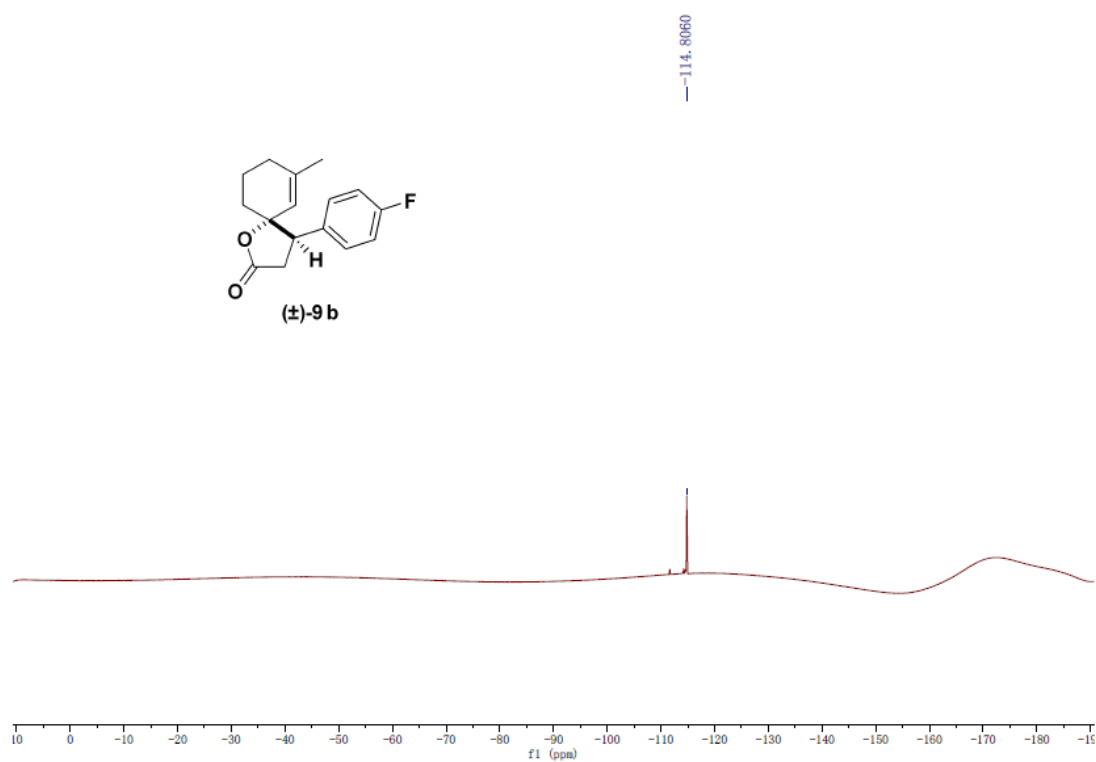

$^1\text{H}$  NMR of ( $\pm$ )-**9b'** (600 M,  $\text{CDCl}_3$ )

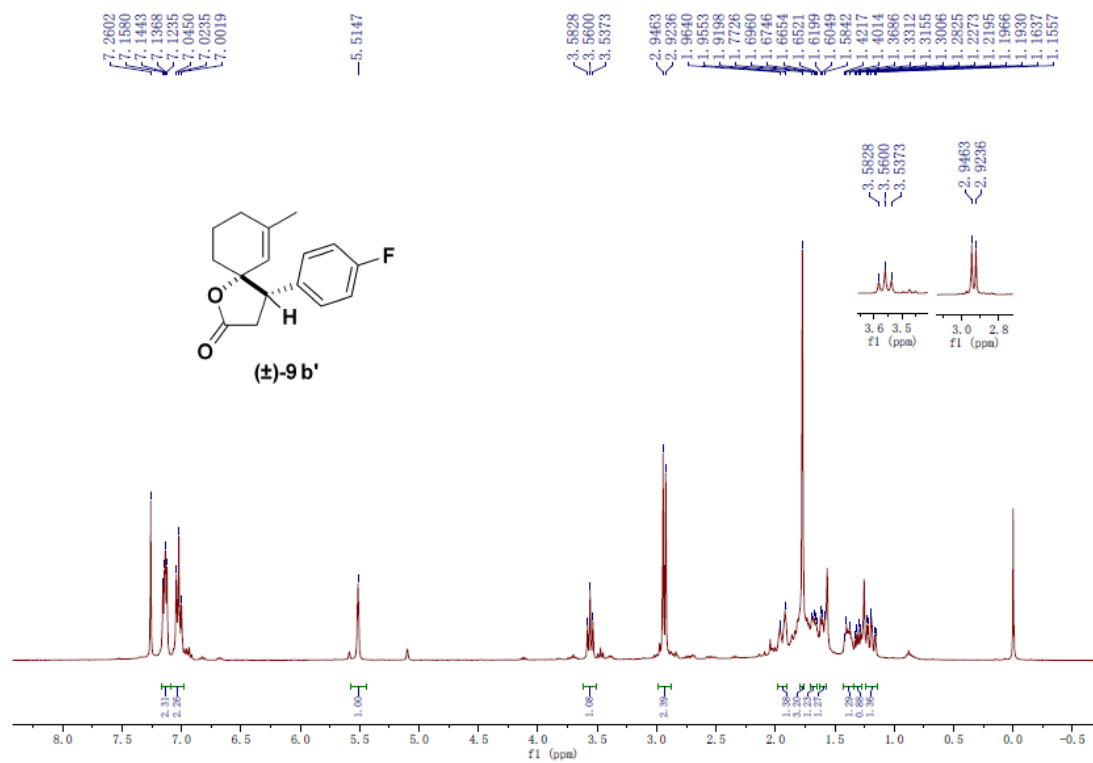

<sup>13</sup>C NMR of (±)-**9b'** (150 M, CDCl<sub>3</sub>)

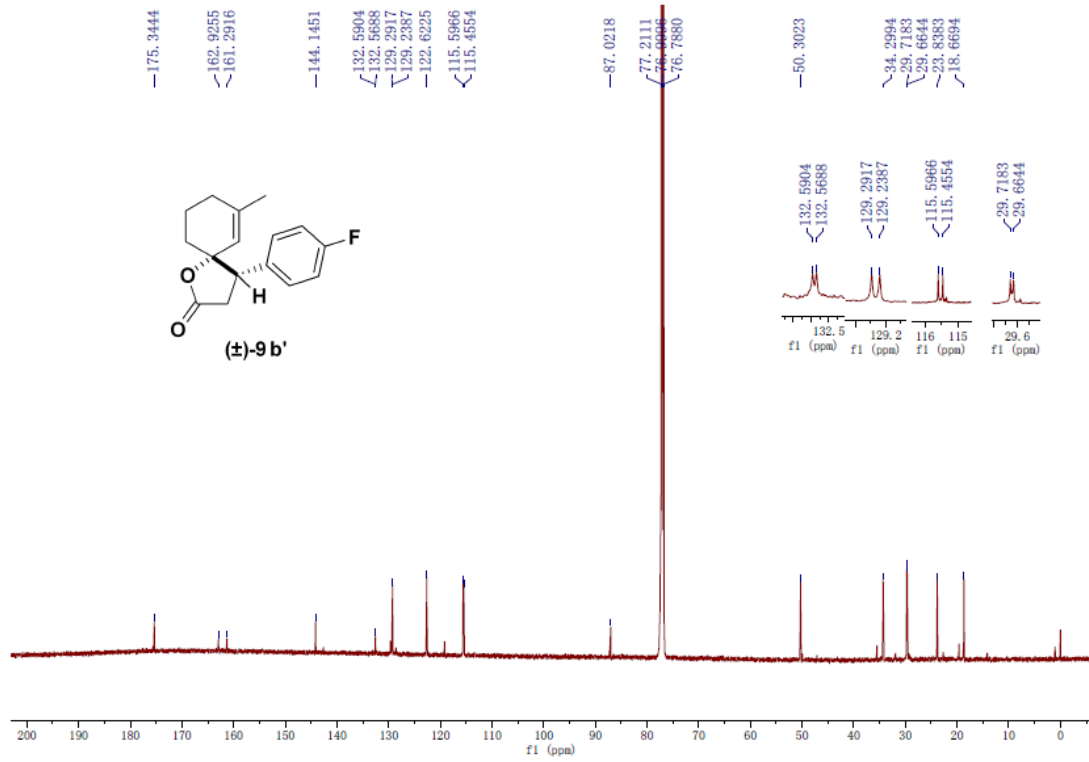

<sup>19</sup>F NMR of (±)-**9b'** (565 M, CDCl<sub>3</sub>)

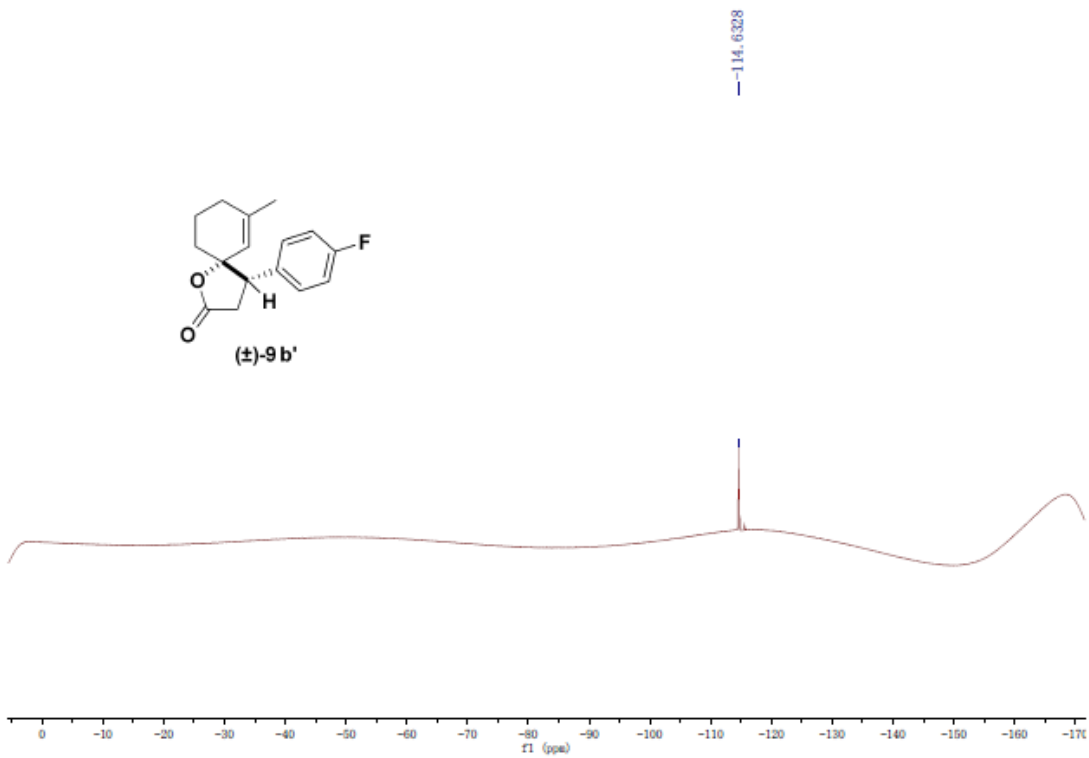







$^{13}\text{C}$  NMR of ( $\pm$ )-**9c'** (150 M,  $\text{CDCl}_3$ )

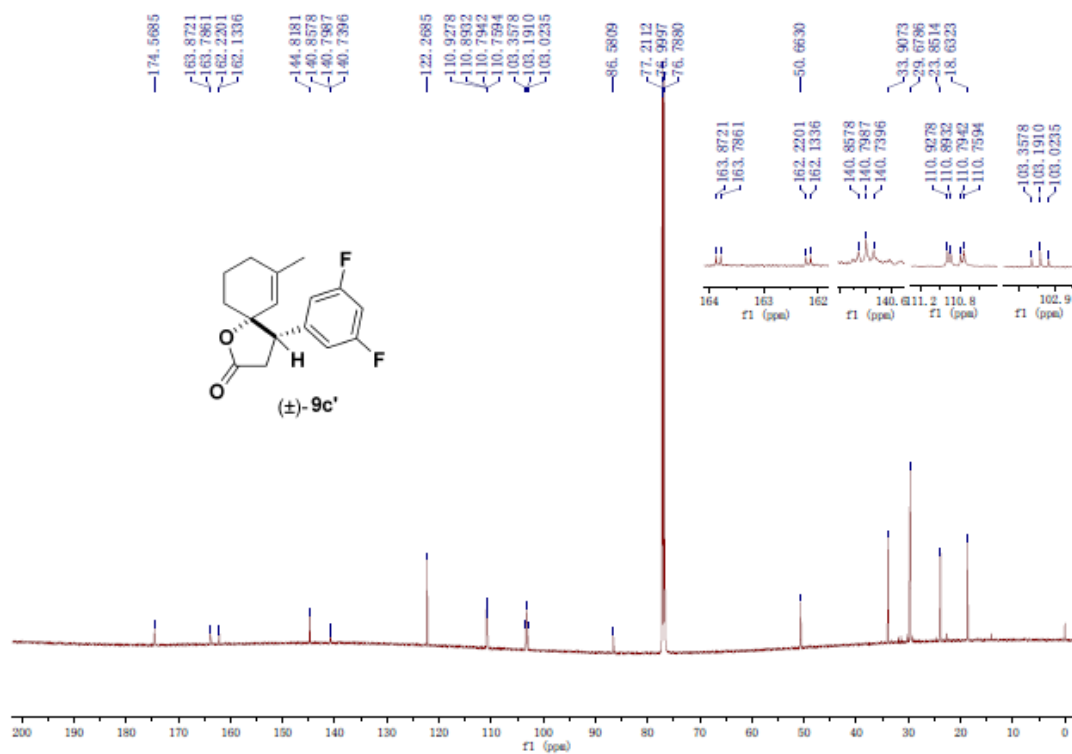

$^{19}\text{F}$  NMR of ( $\pm$ )-**9c'** (565 M,  $\text{CDCl}_3$ )

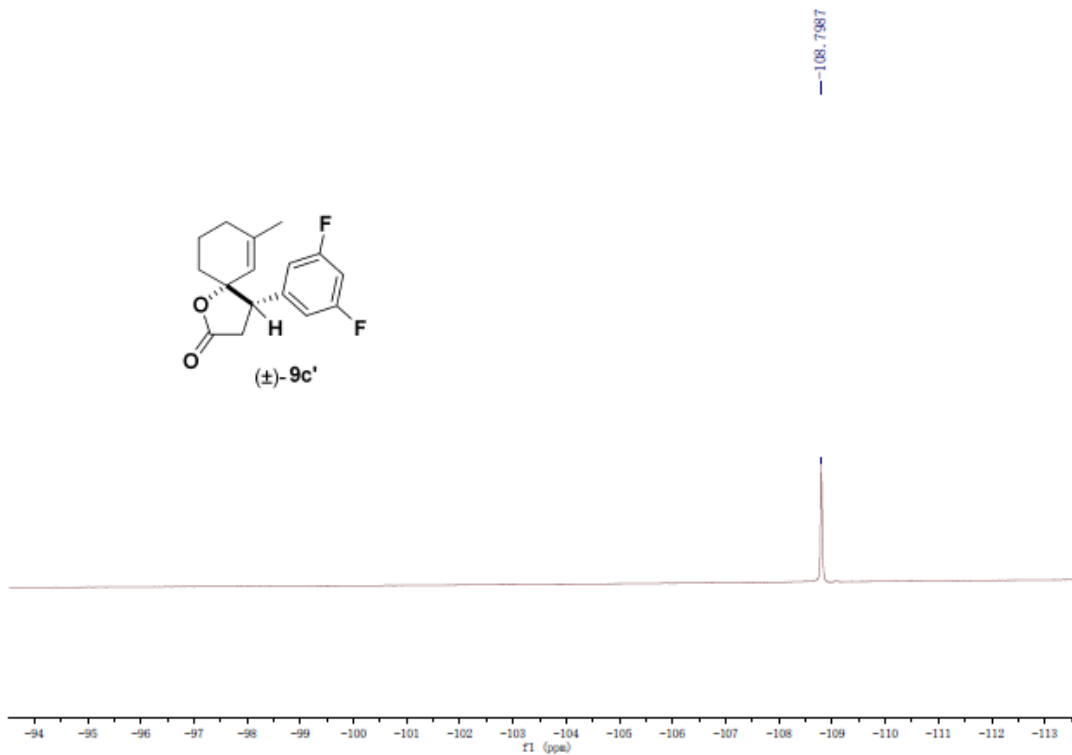

<sup>1</sup>H NMR of (±)-9d (600 M, CDCl<sub>3</sub>)

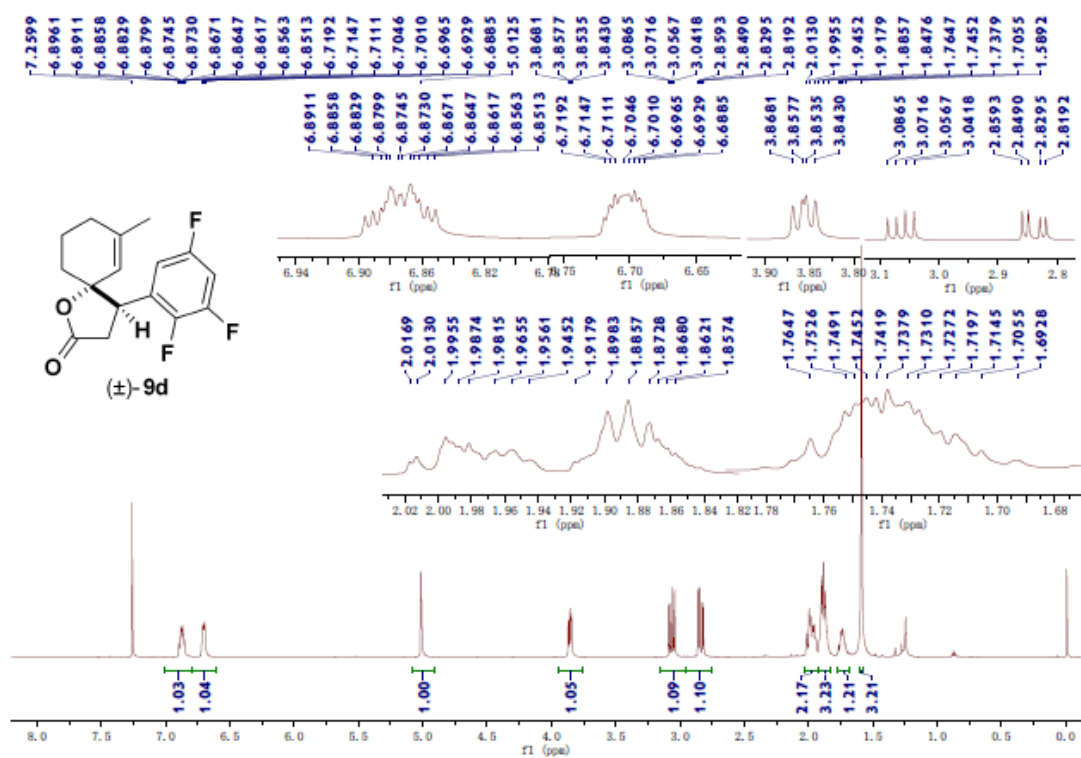

<sup>13</sup>C NMR of (±)-9d (150 M, CDCl<sub>3</sub>)

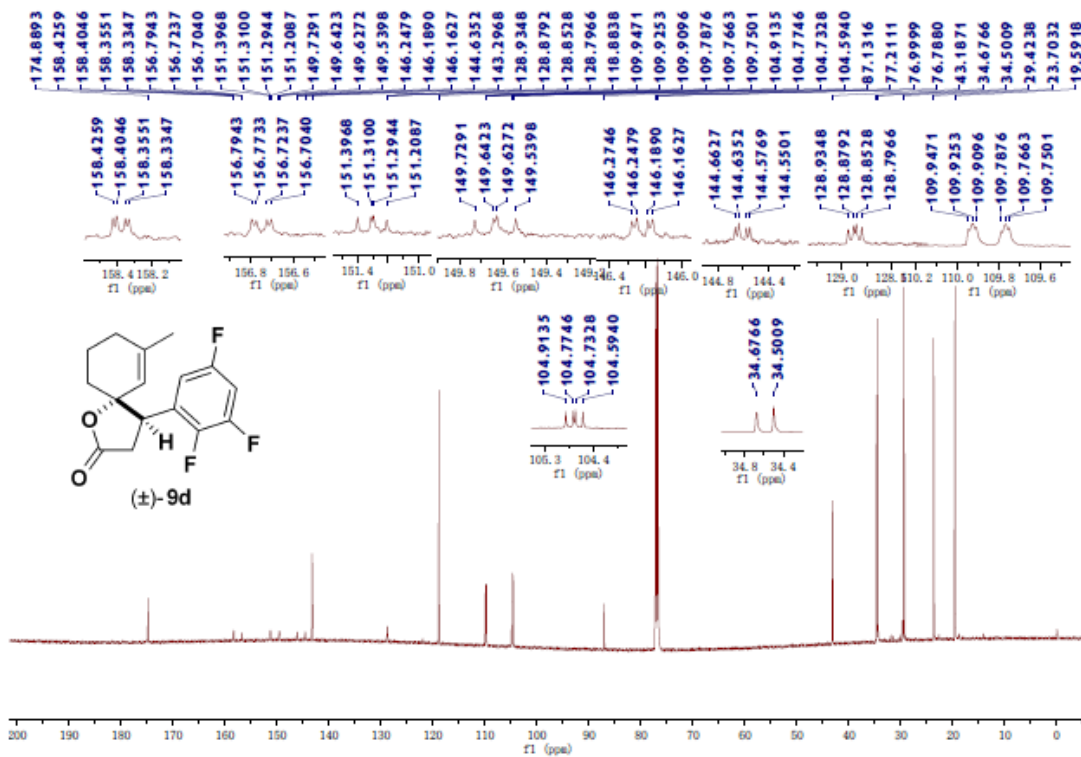

$^{19}\text{F}$  NMR of ( $\pm$ )-**9d** (565 M,  $\text{CDCl}_3$ )

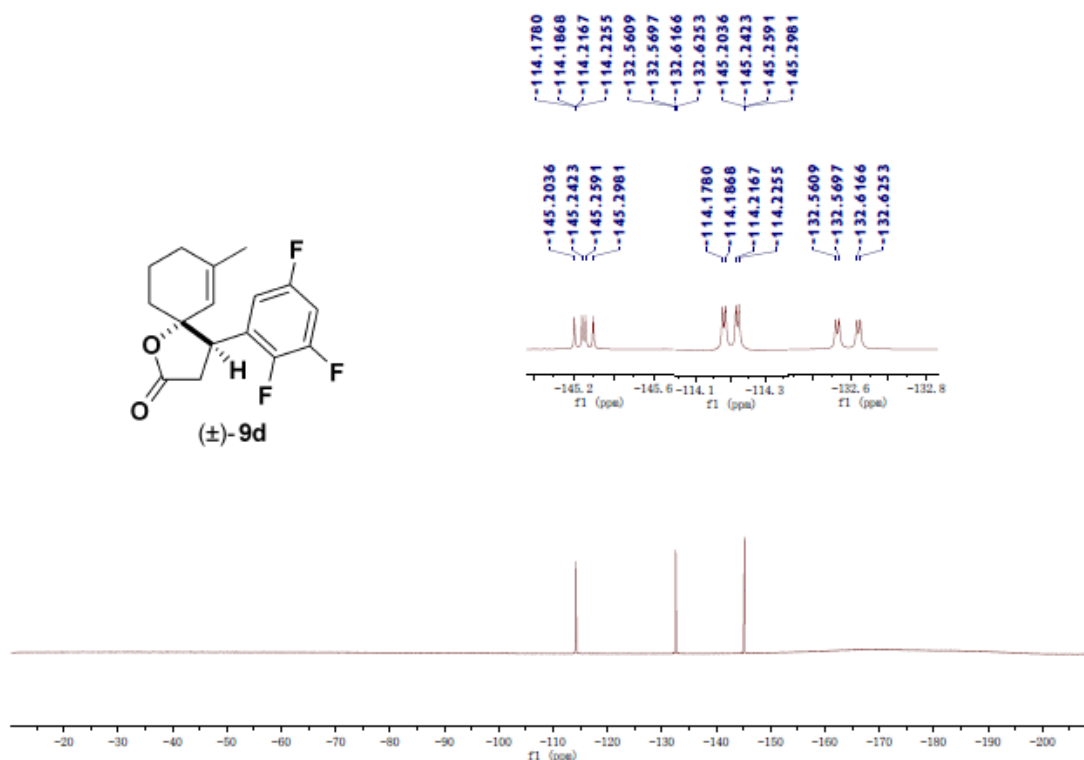

$^1\text{H}$  NMR of ( $\pm$ )-**9d'** (600 M,  $\text{CDCl}_3$ )

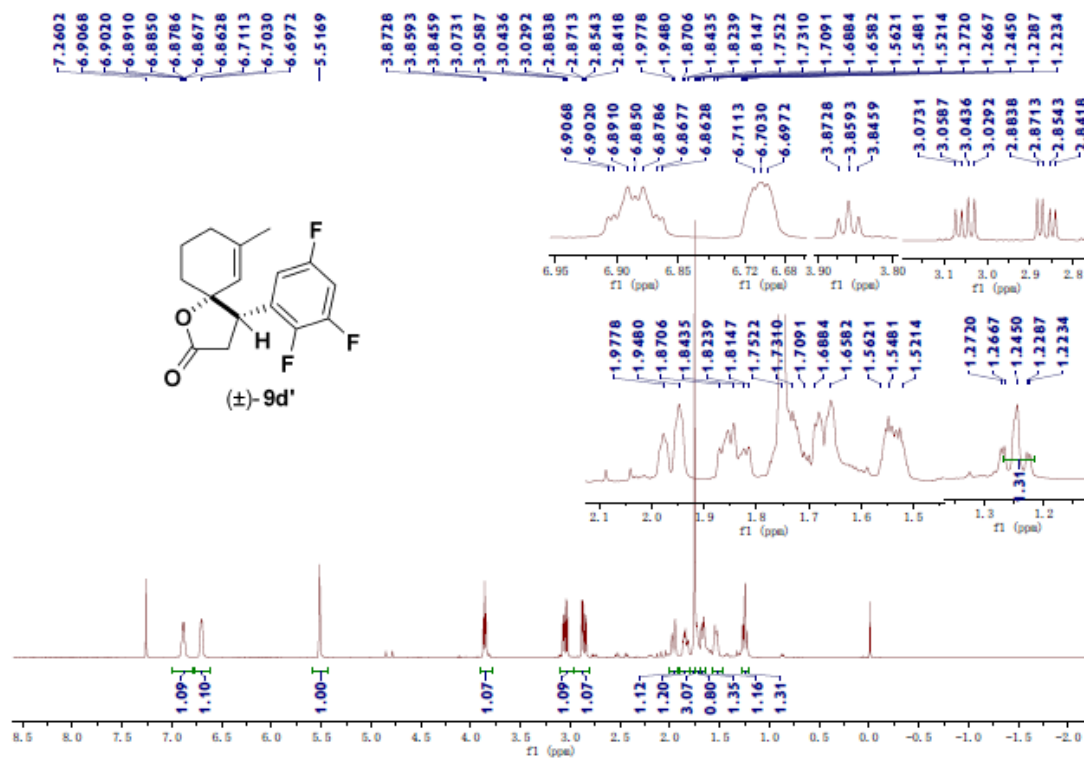

<sup>13</sup>C NMR of (±)-9d' (150 M, CDCl<sub>3</sub>)

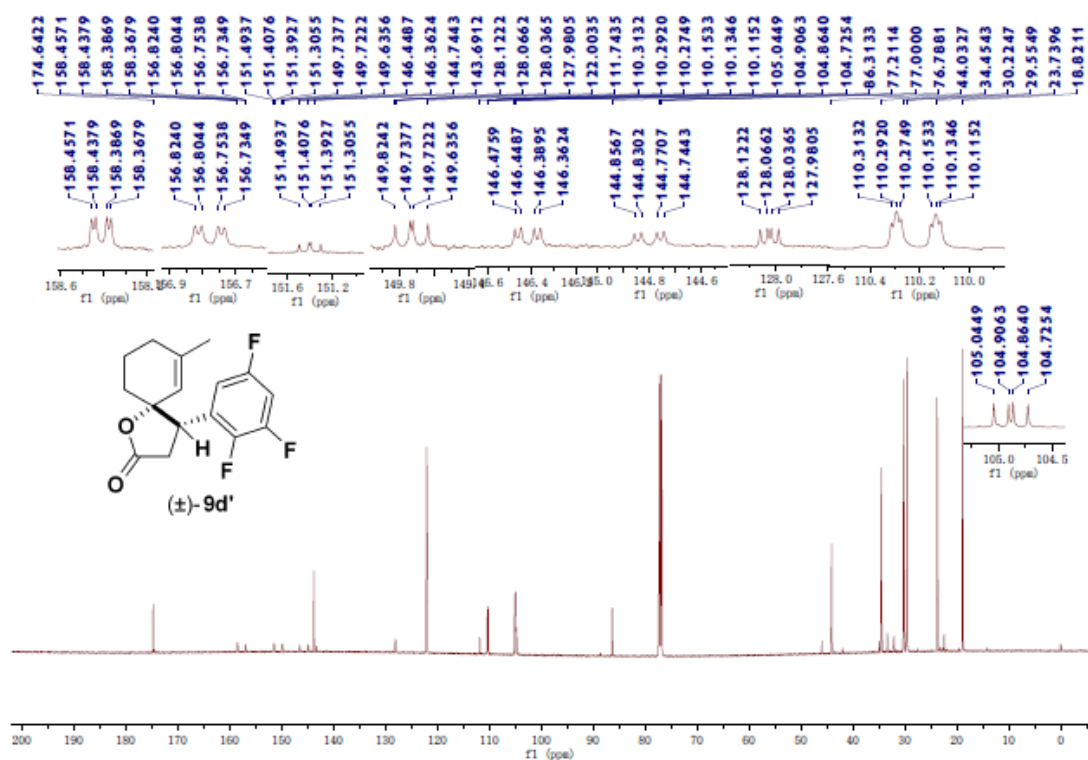

<sup>19</sup>F NMR of (±)-9d' (565 M, CDCl<sub>3</sub>)

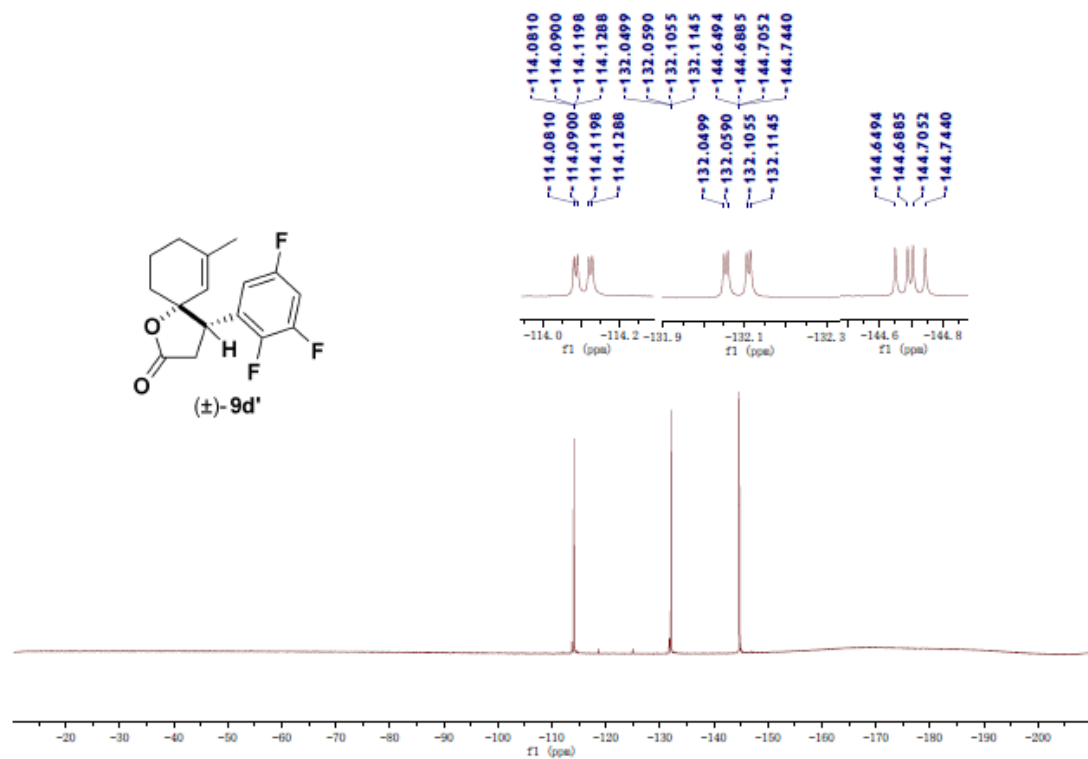

<sup>1</sup>H NMR of (±)-**9e** (600 M, CDCl<sub>3</sub>)

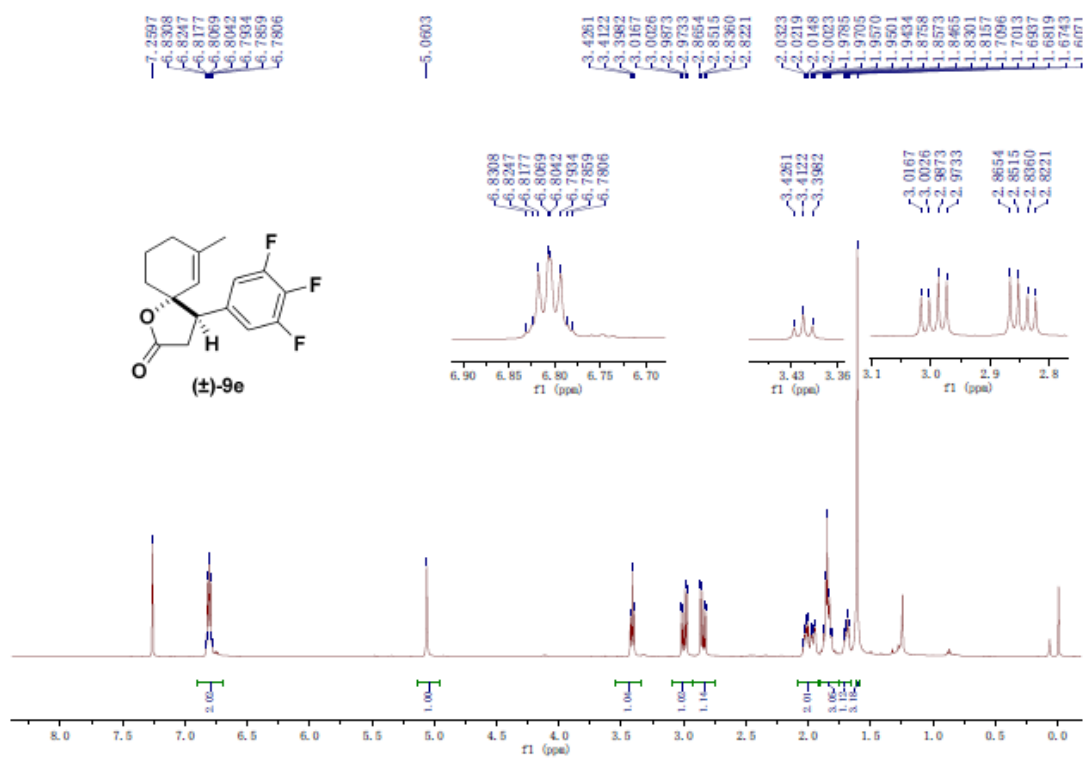

<sup>13</sup>C NMR of (±)-**9e** (150 M, CDCl<sub>3</sub>)

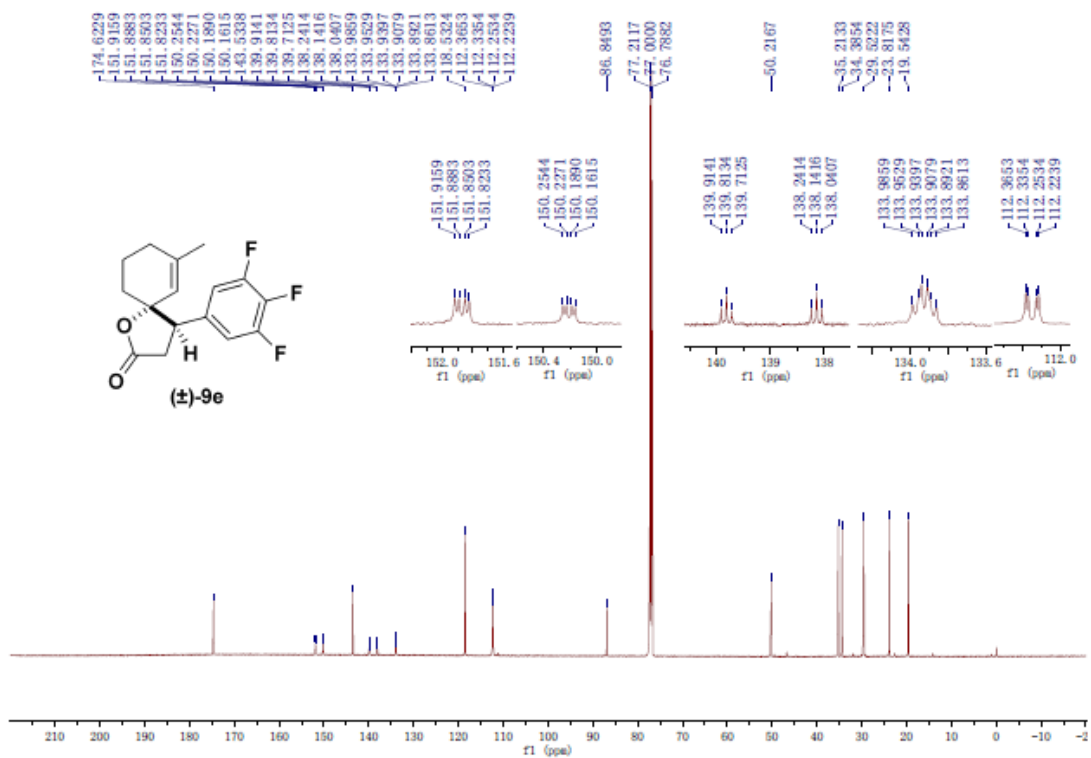

$^{19}\text{F}$  NMR of ( $\pm$ )-**9e** (376 M,  $\text{CDCl}_3$ )

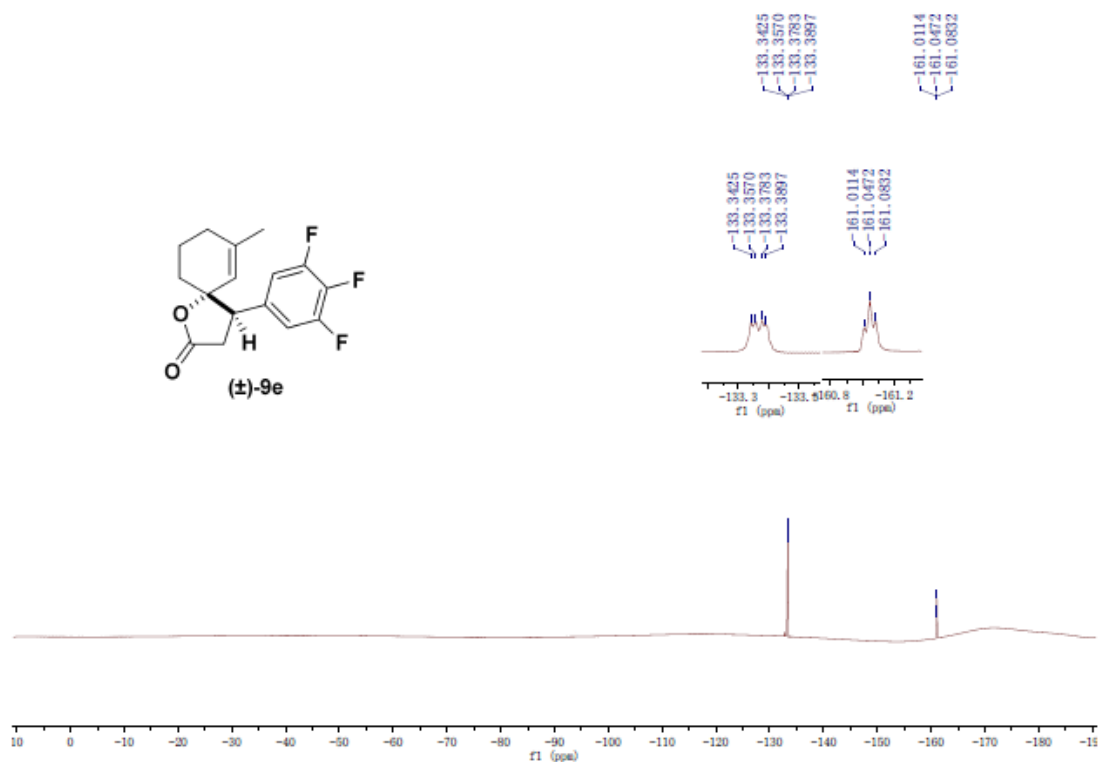

$^1\text{H}$  NMR of ( $\pm$ )-**9e'** (600 M,  $\text{CDCl}_3$ )

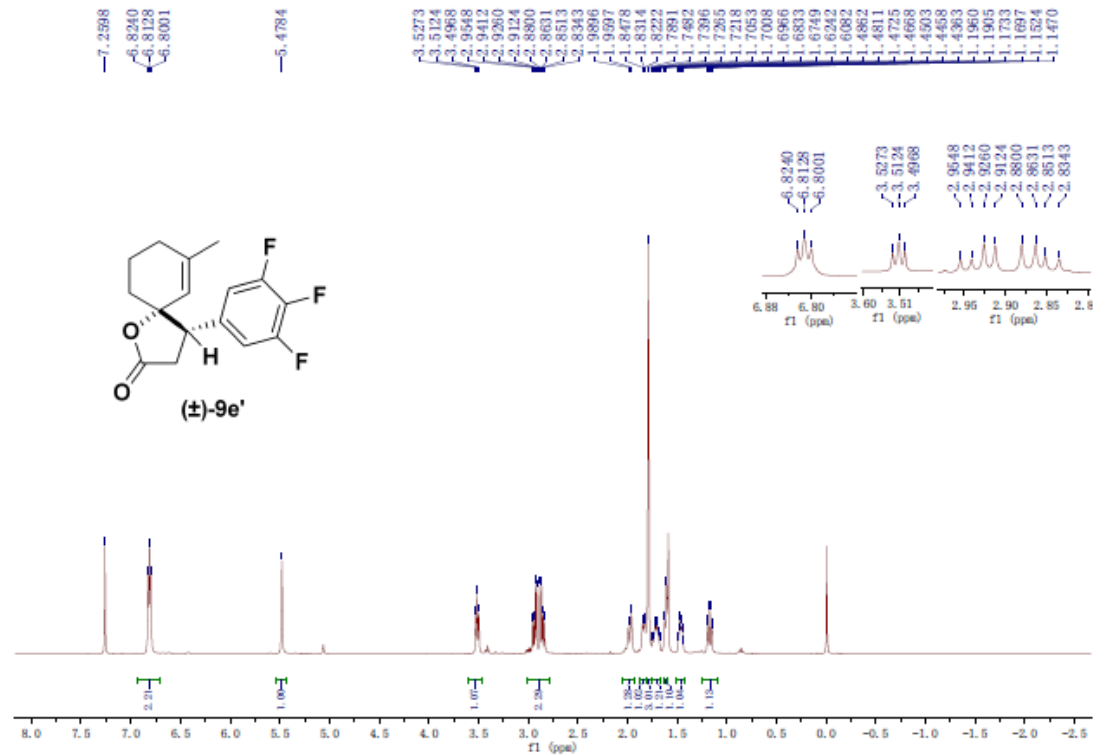

<sup>13</sup>C NMR of (±)-**9e'** (150 M, CDCl<sub>3</sub>)

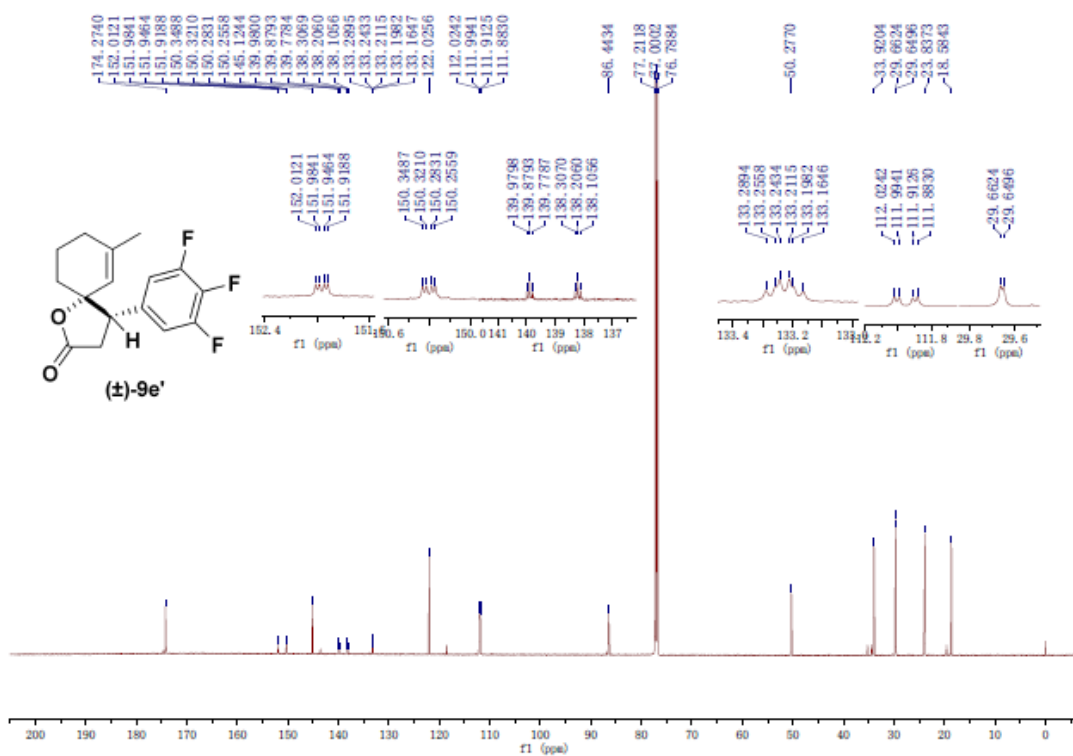

<sup>19</sup>F NMR of (±)-**9e'** (376 M, CDCl<sub>3</sub>)

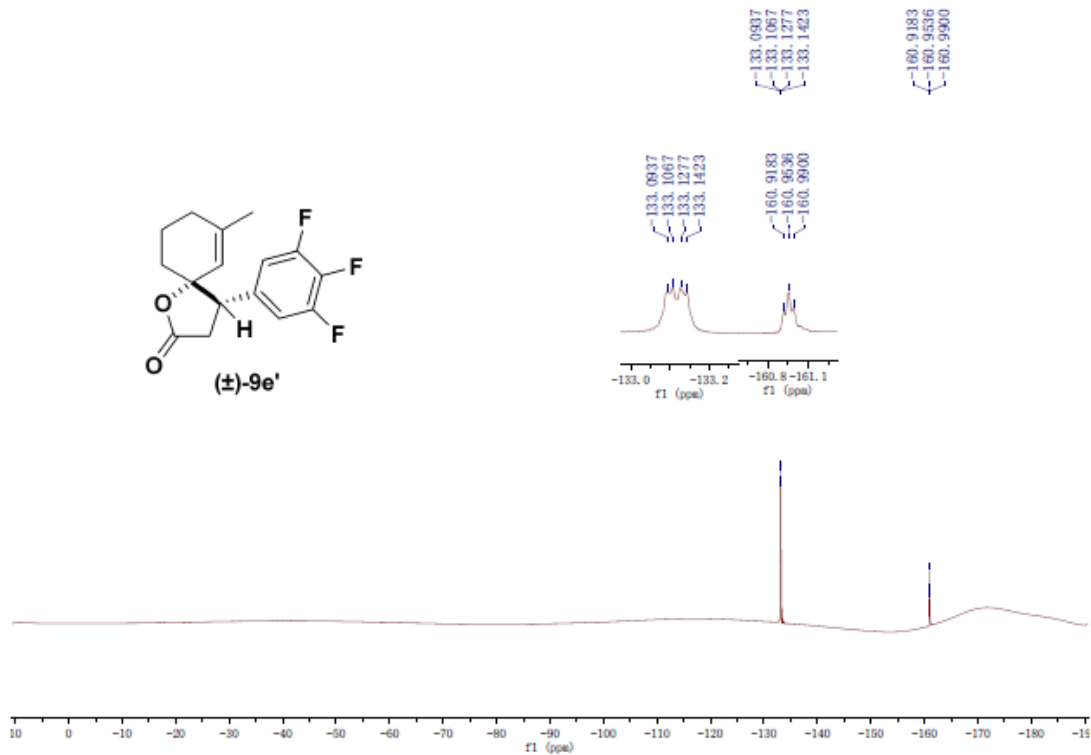

<sup>1</sup>H NMR of (±)-**9f** (600 M, CDCl<sub>3</sub>)

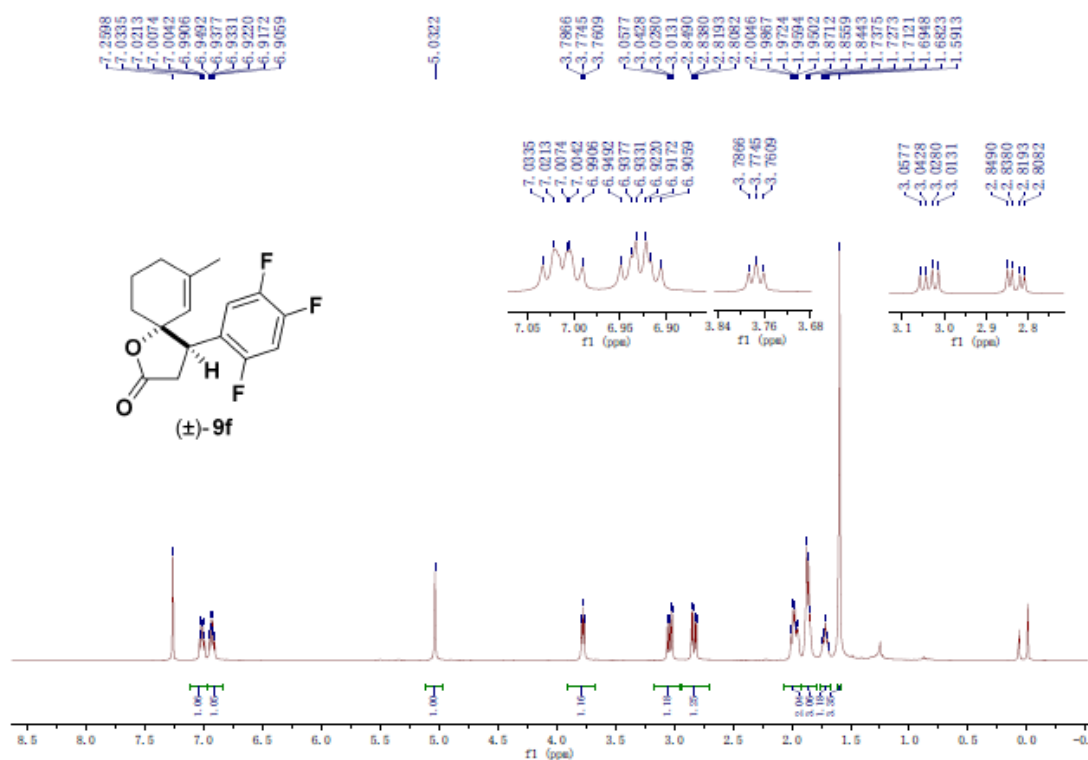

<sup>13</sup>C NMR of (±)-**9f** (150 M, CDCl<sub>3</sub>)

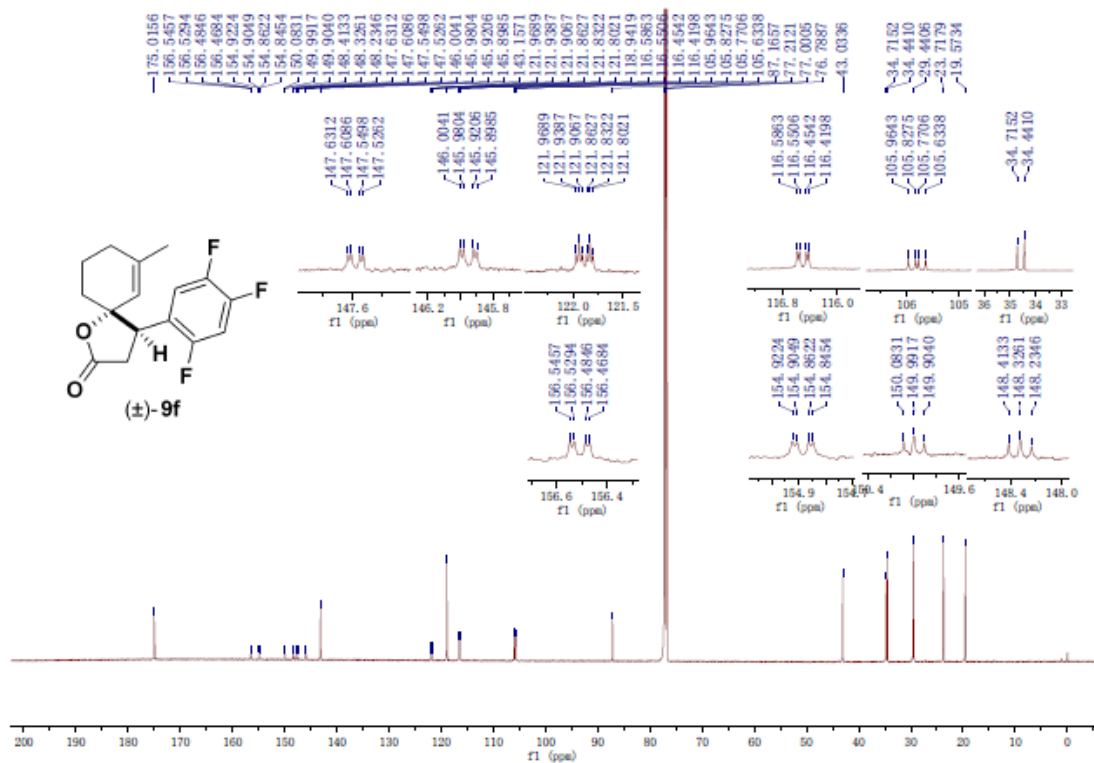



$^{19}\text{F}$  NMR of ( $\pm$ )-**9f** (565 M,  $\text{CDCl}_3$ )

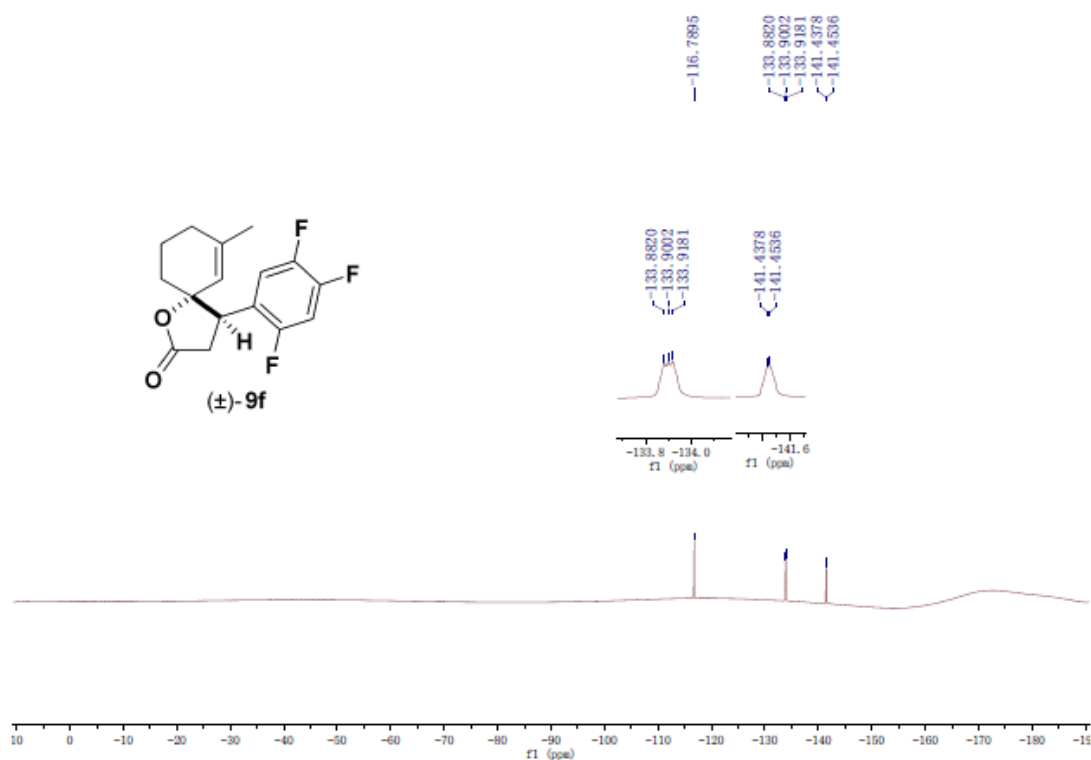

$^1\text{H}$  NMR of ( $\pm$ )-**9f'** (600 M,  $\text{CDCl}_3$ )

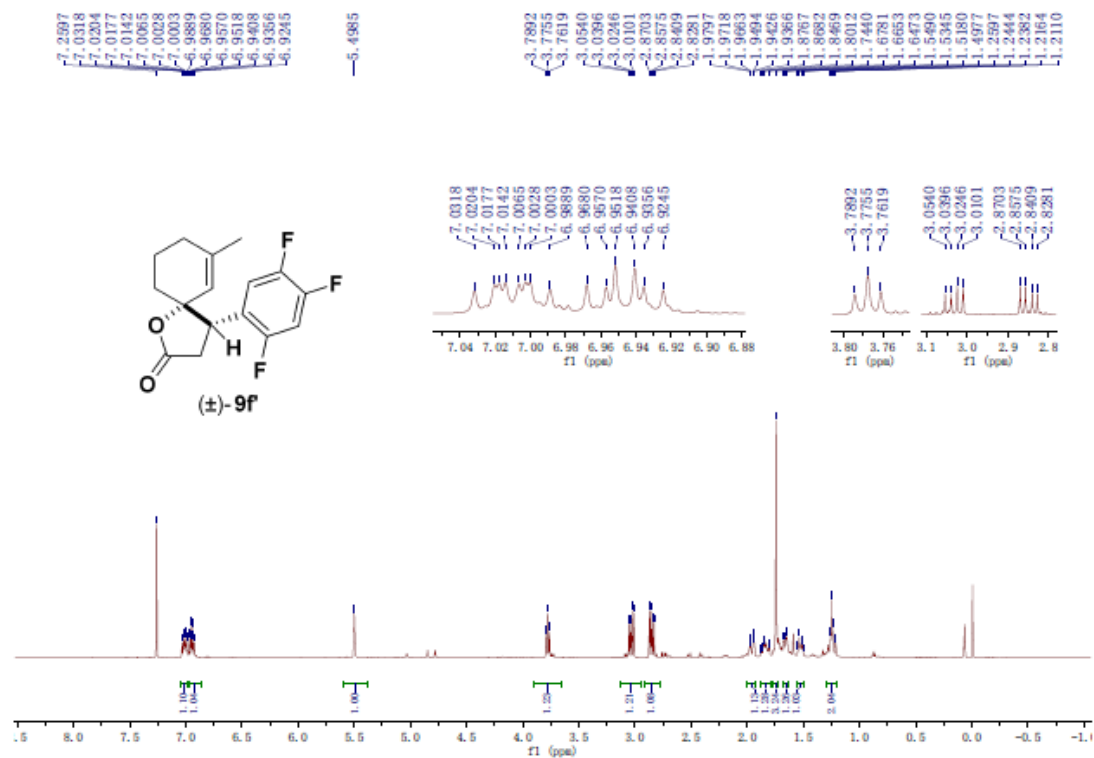

<sup>13</sup>C NMR of (±)-9f' (150 M, CDCl<sub>3</sub>)

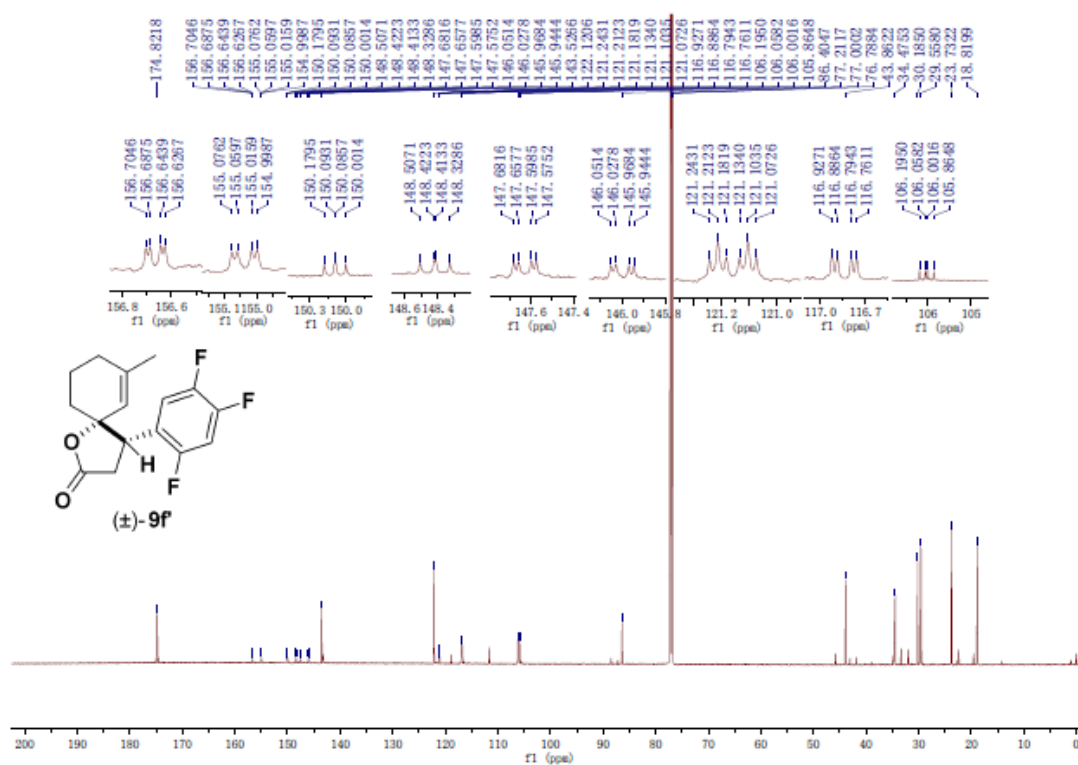

<sup>19</sup>F NMR of (±)-9f' (565 M, CDCl<sub>3</sub>)

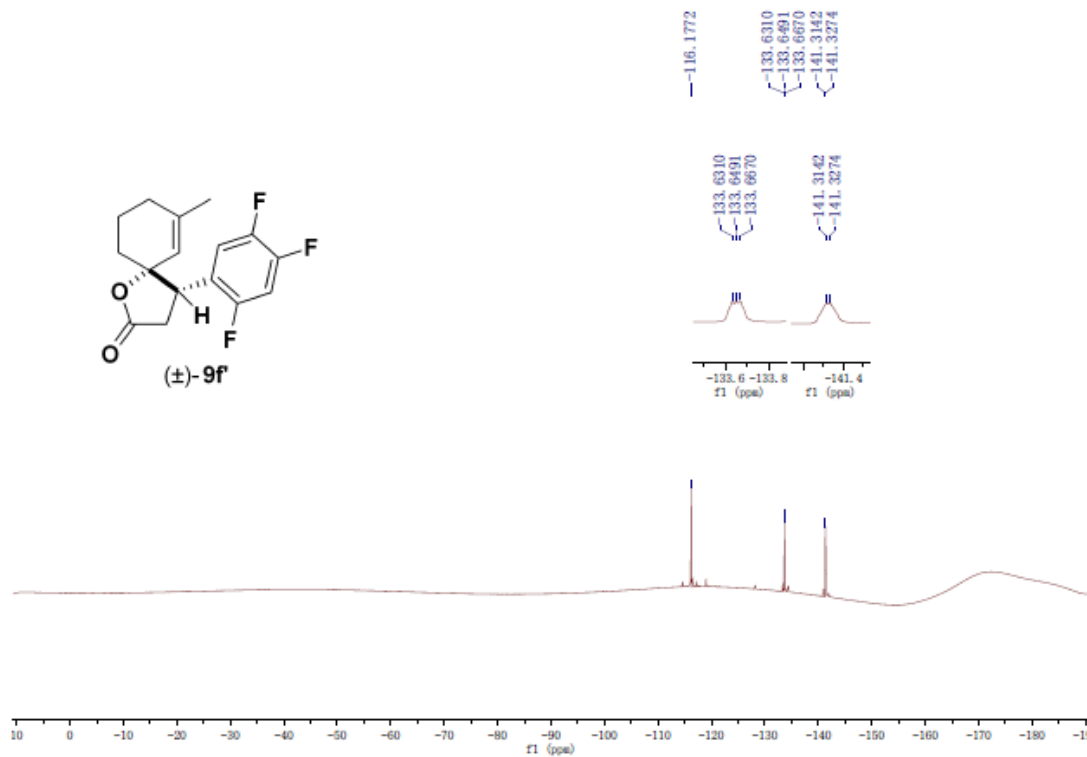











<sup>13</sup>C NMR of (±)-**9h'** (150 M, CDCl<sub>3</sub>)

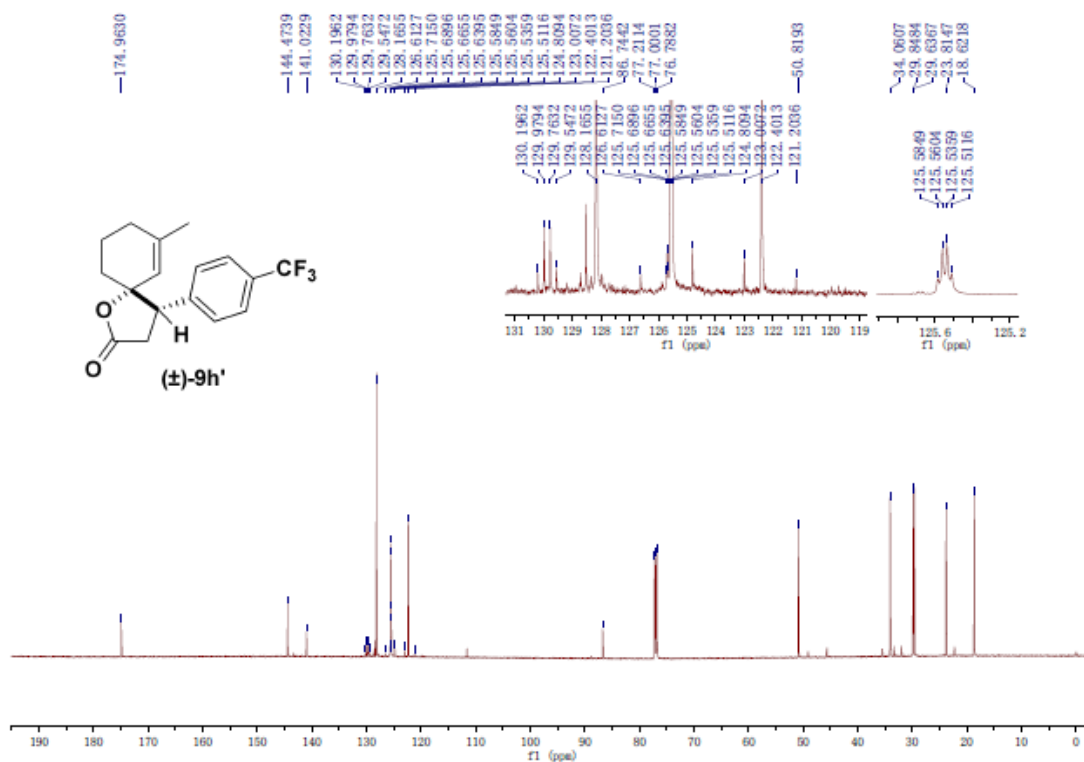

<sup>19</sup>F NMR of (±)-**9h'** (565 M, CDCl<sub>3</sub>)

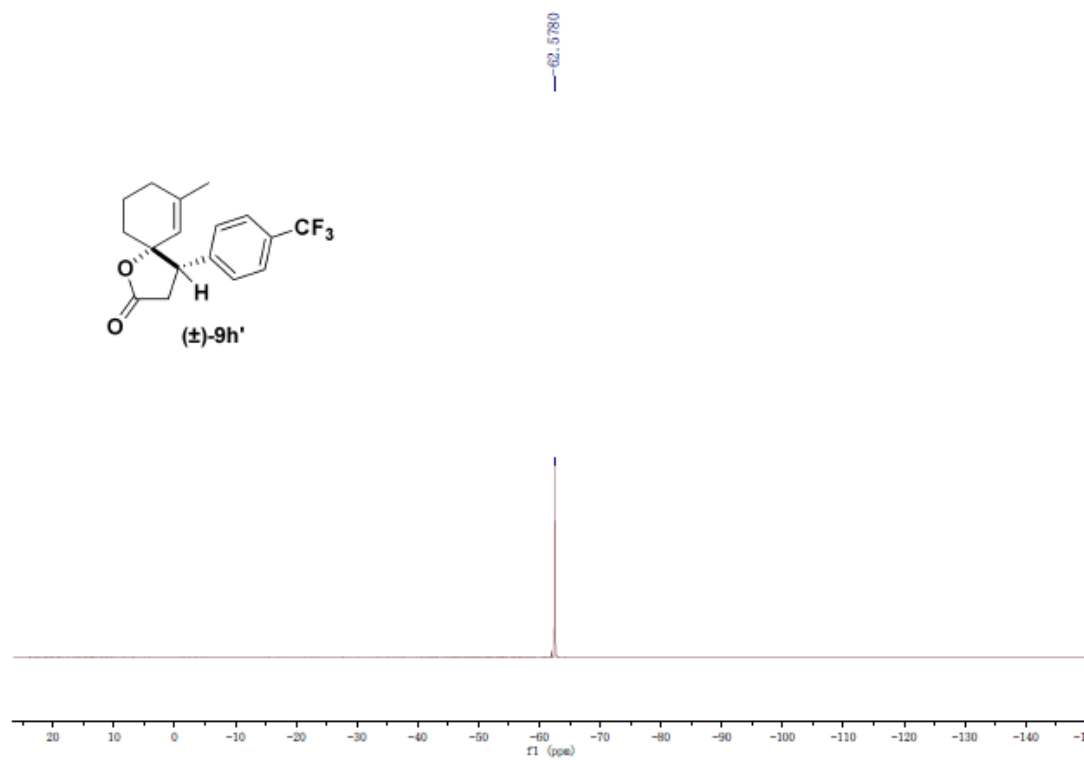





<sup>1</sup>H NMR of (±)-**9j** (600 M, CDCl<sub>3</sub>)

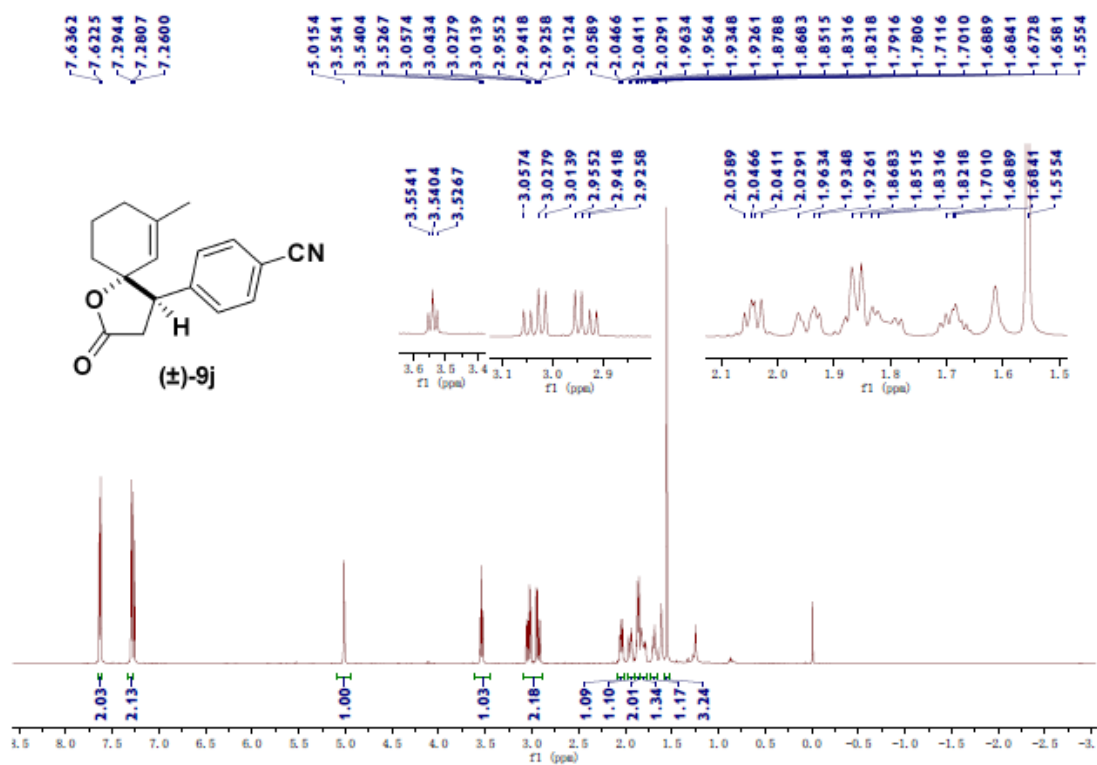

<sup>13</sup>C NMR of (±)-**9j** (150 M, CDCl<sub>3</sub>)

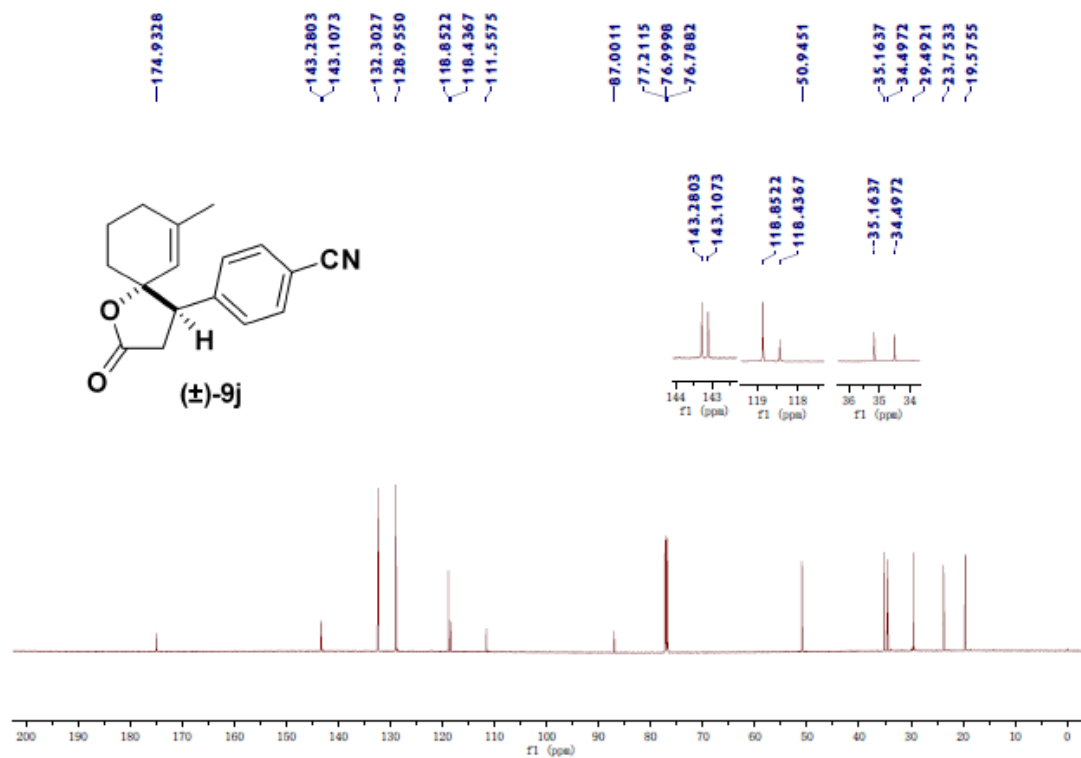

<sup>1</sup>H NMR of (±)-**9j'** (600 M, CDCl<sub>3</sub>)

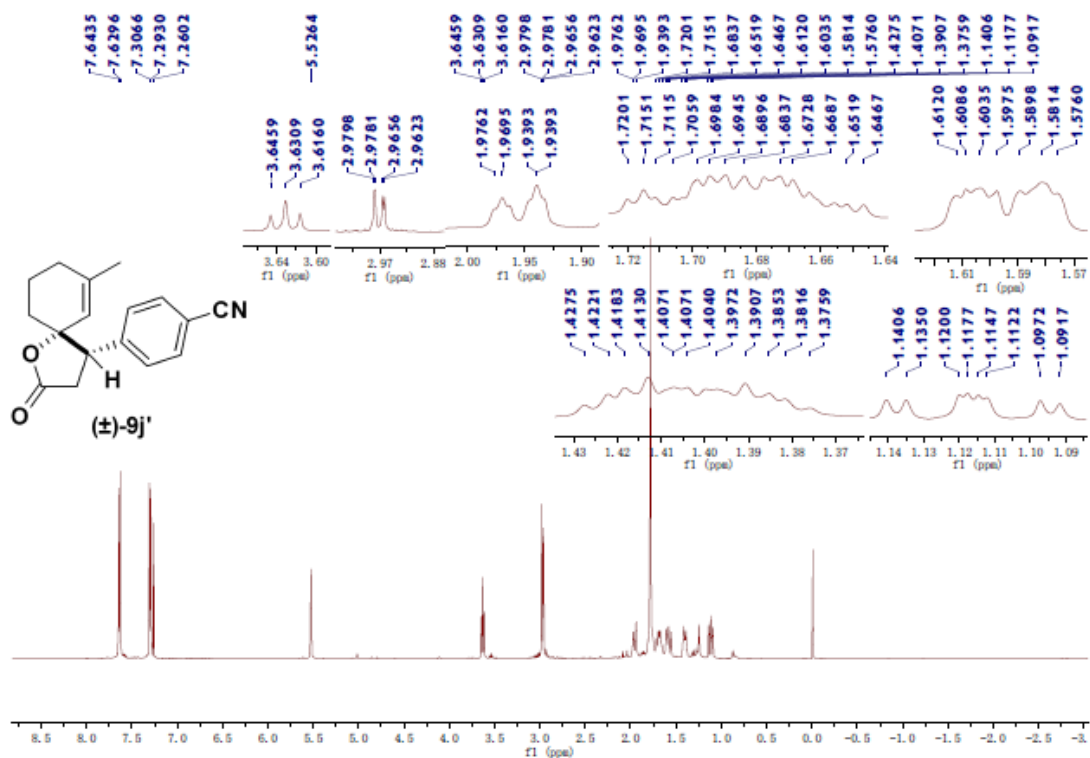

<sup>13</sup>C NMR of (±)-**9j'** (150 M, CDCl<sub>3</sub>)

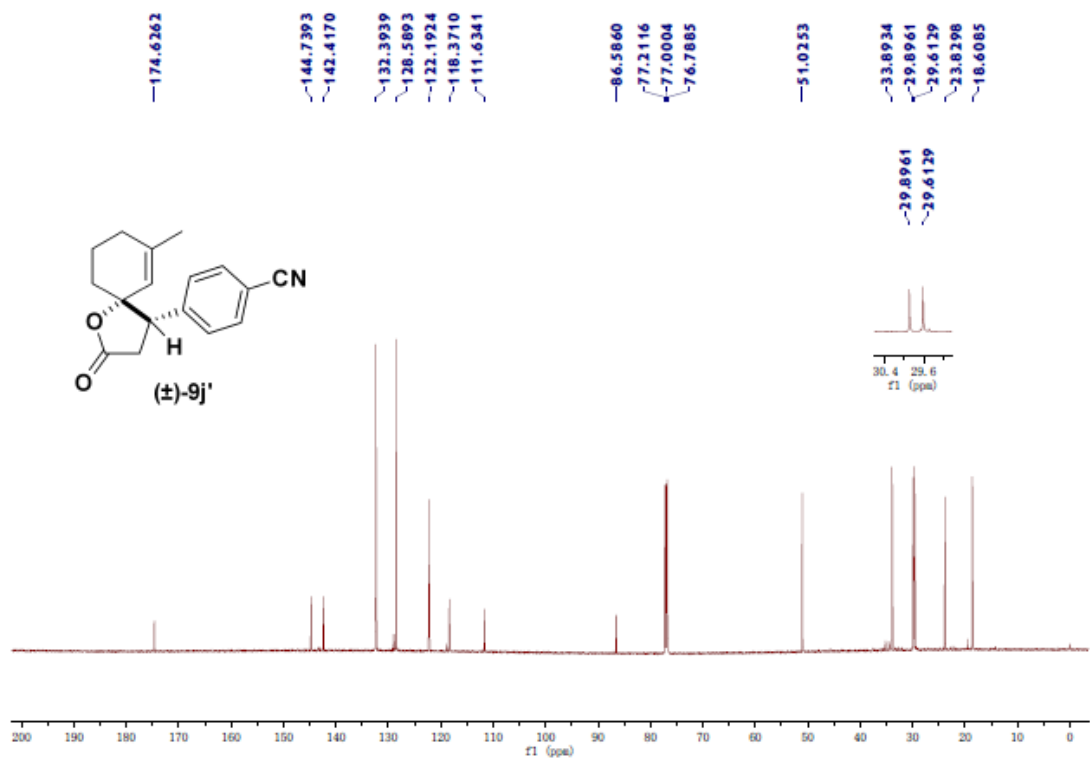

<sup>1</sup>H NMR of (±)-9k and (±)-9k' (400 M, CDCl<sub>3</sub>)

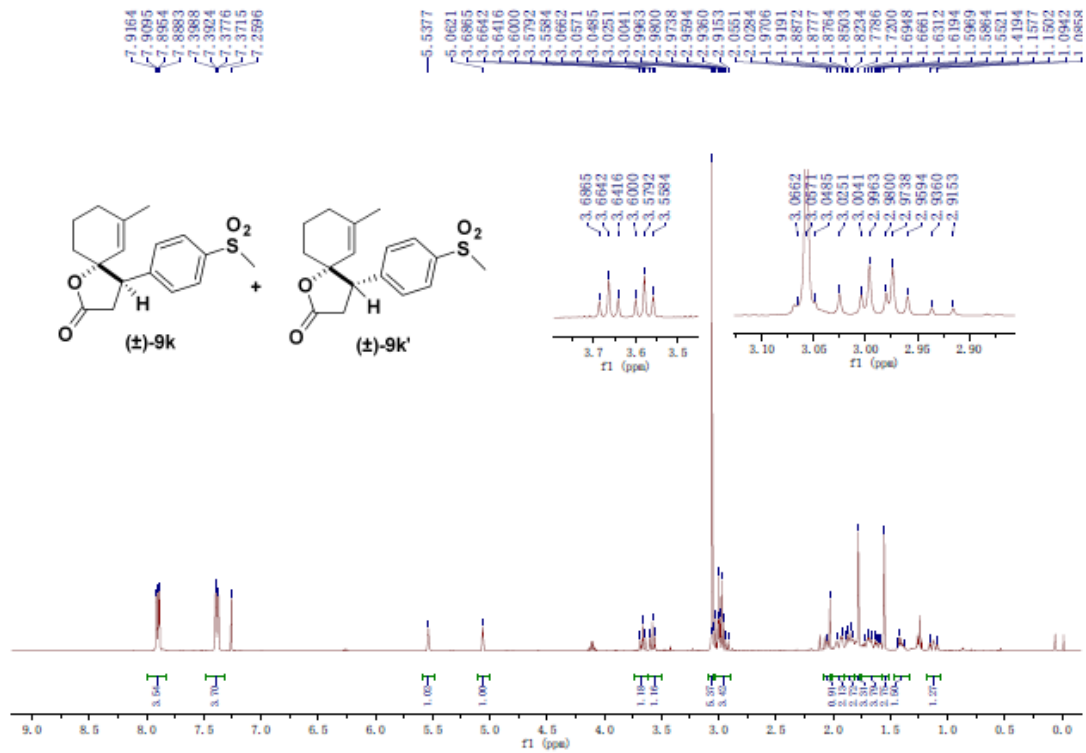

<sup>13</sup>C NMR of (±)-9k and (±)-9k' (100 M, CDCl<sub>3</sub>)

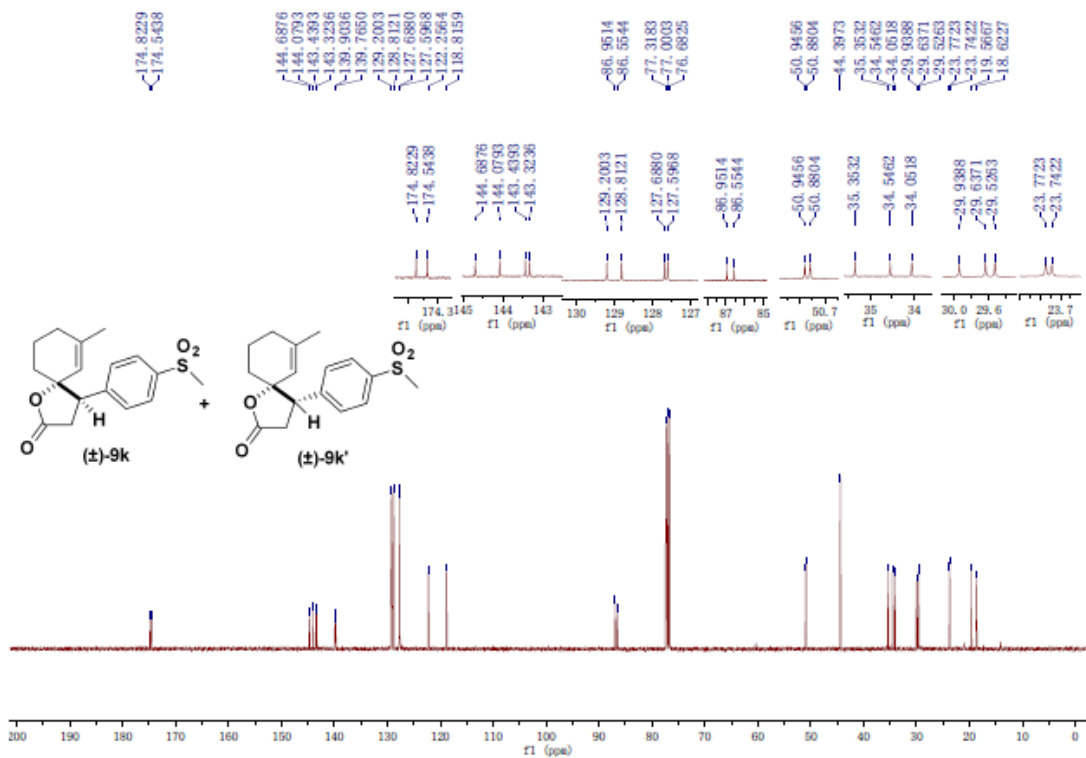















<sup>1</sup>H NMR of (±)-**9r** (400 M, CDCl<sub>3</sub>)

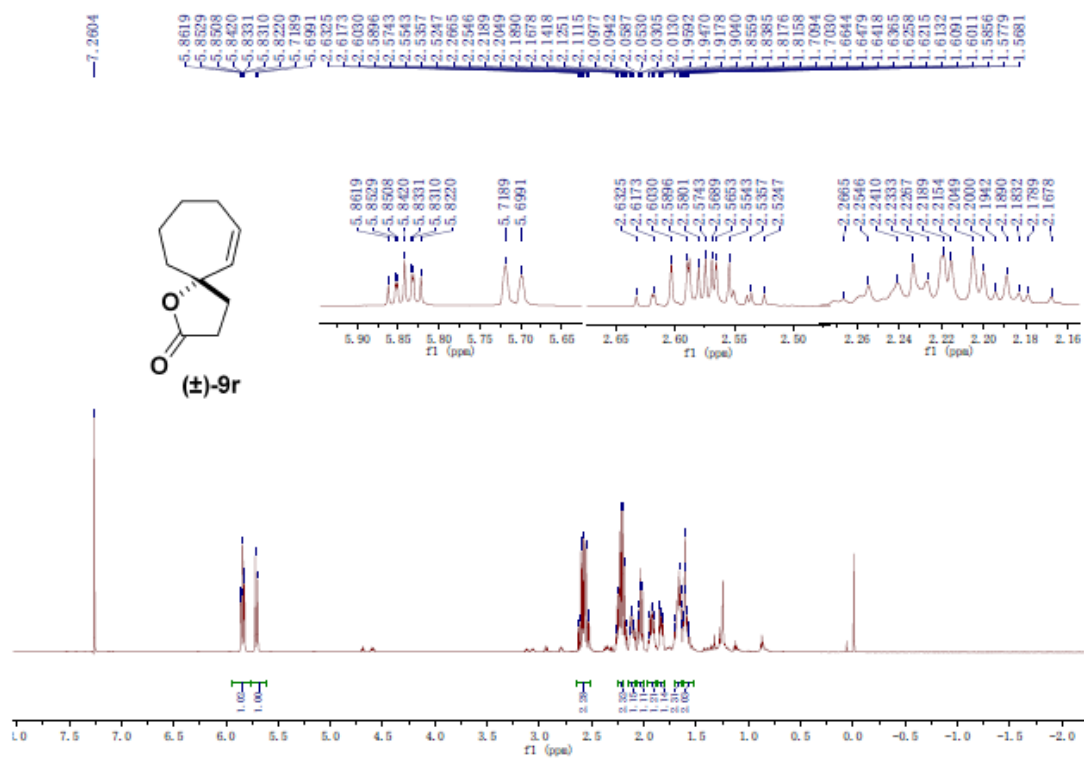

<sup>1</sup>H NMR of (±)-**9s** (400 M, CDCl<sub>3</sub>)

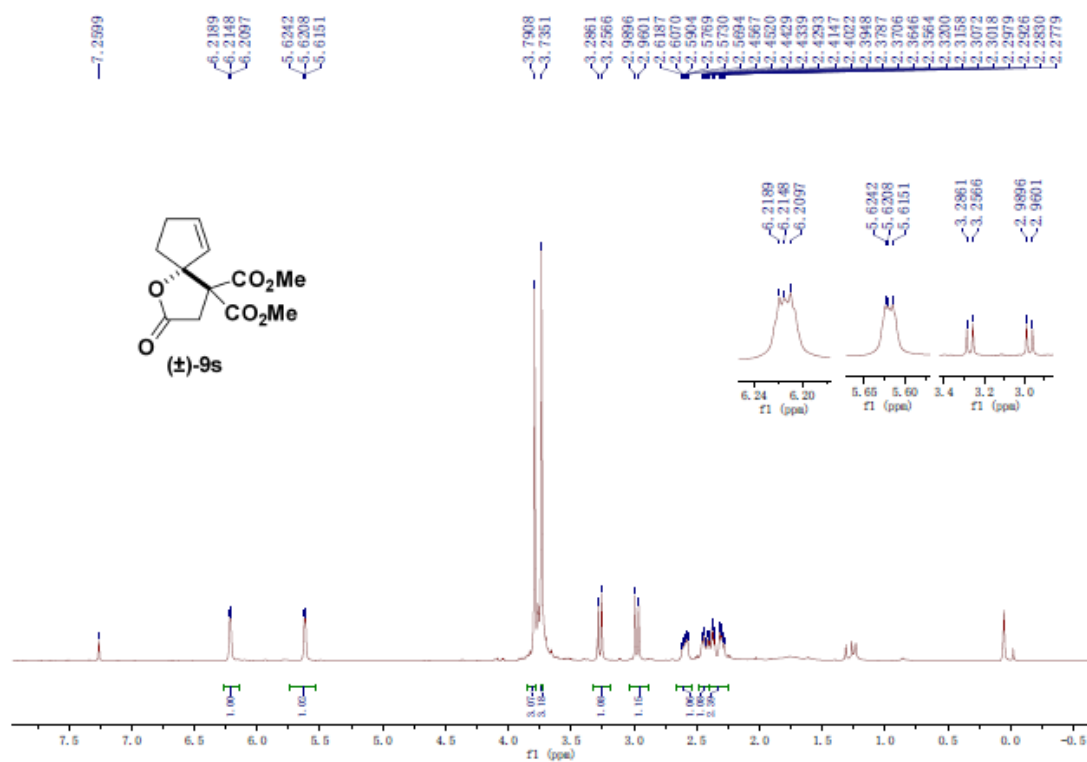

<sup>13</sup>C NMR of (±)-**9s** (100 M, CDCl<sub>3</sub>)

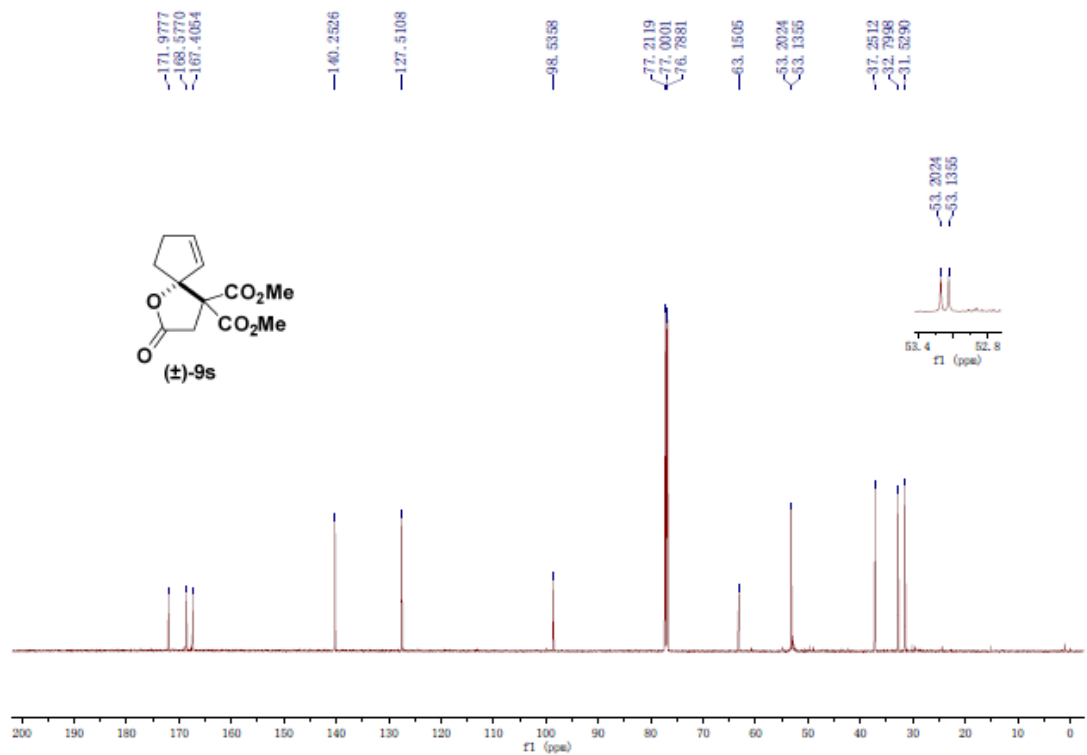

<sup>1</sup>H NMR of (±)-**9t** (600 M, CDCl<sub>3</sub>)

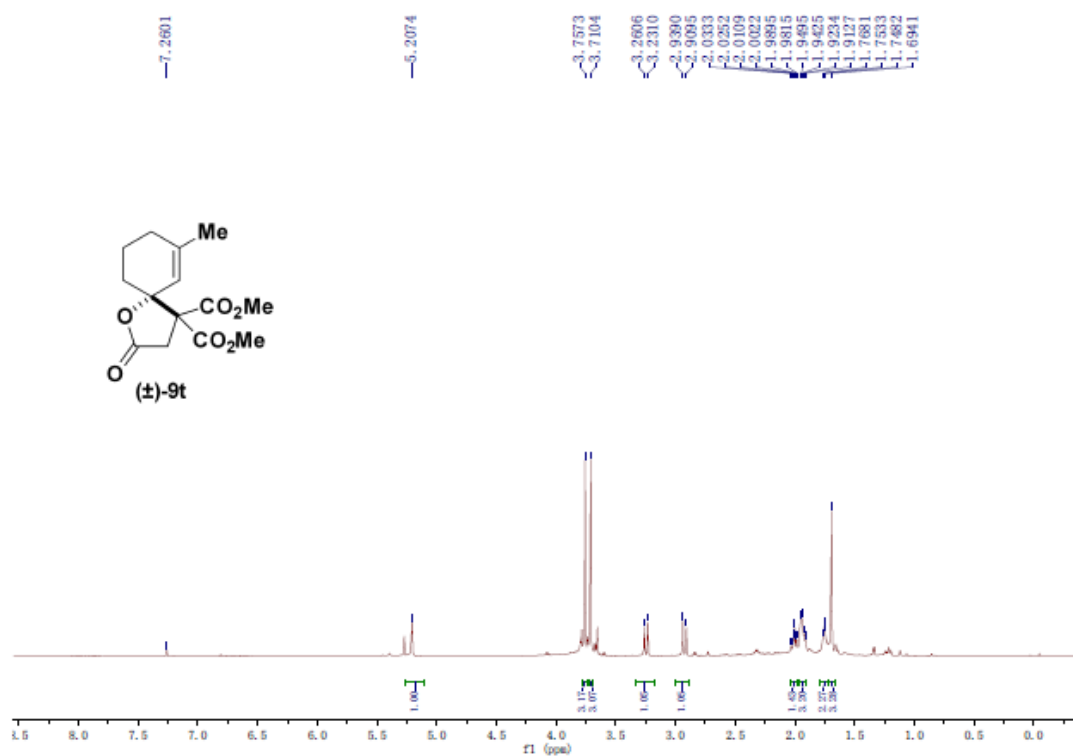

<sup>13</sup>C NMR of (±)-**9t** (150 M, CDCl<sub>3</sub>)

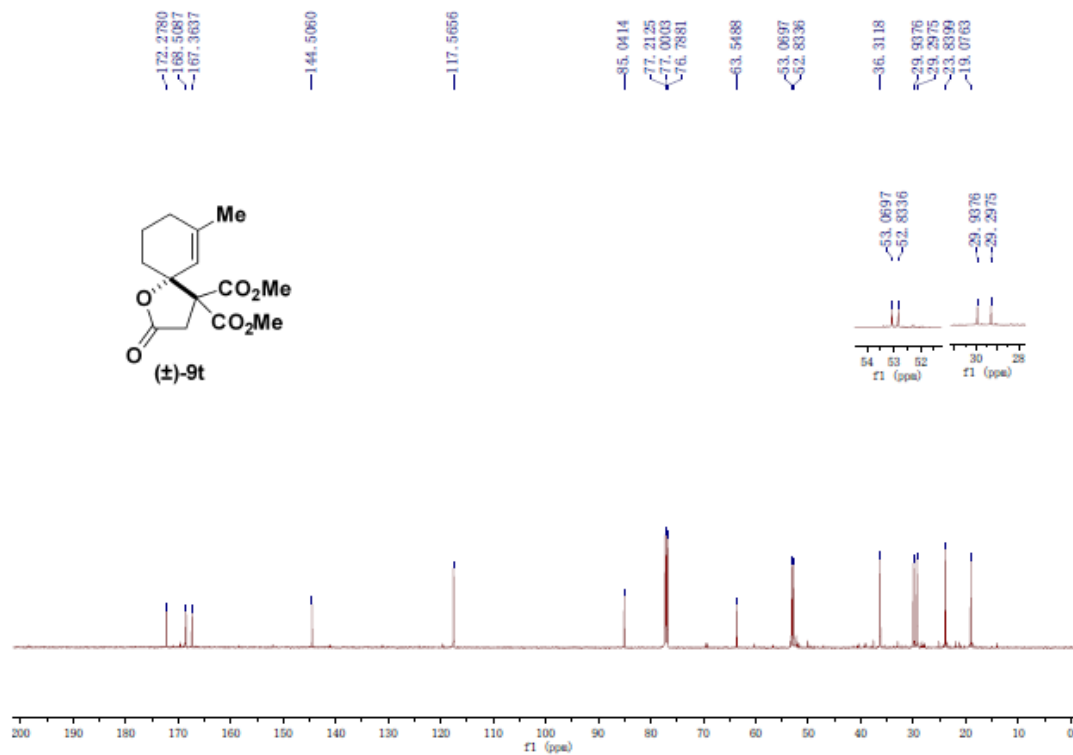

<sup>1</sup>H NMR of (±)-**9u** (400 M, CDCl<sub>3</sub>)

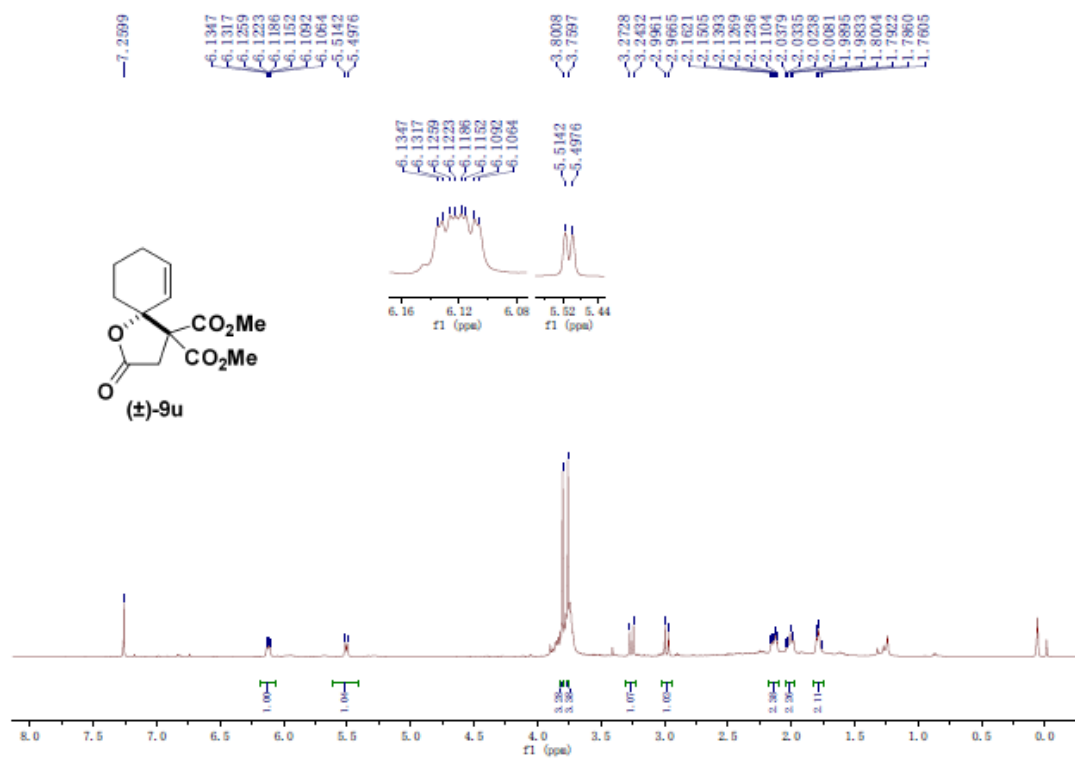

<sup>13</sup>C NMR of (±)-**9u** (100 M, CDCl<sub>3</sub>)

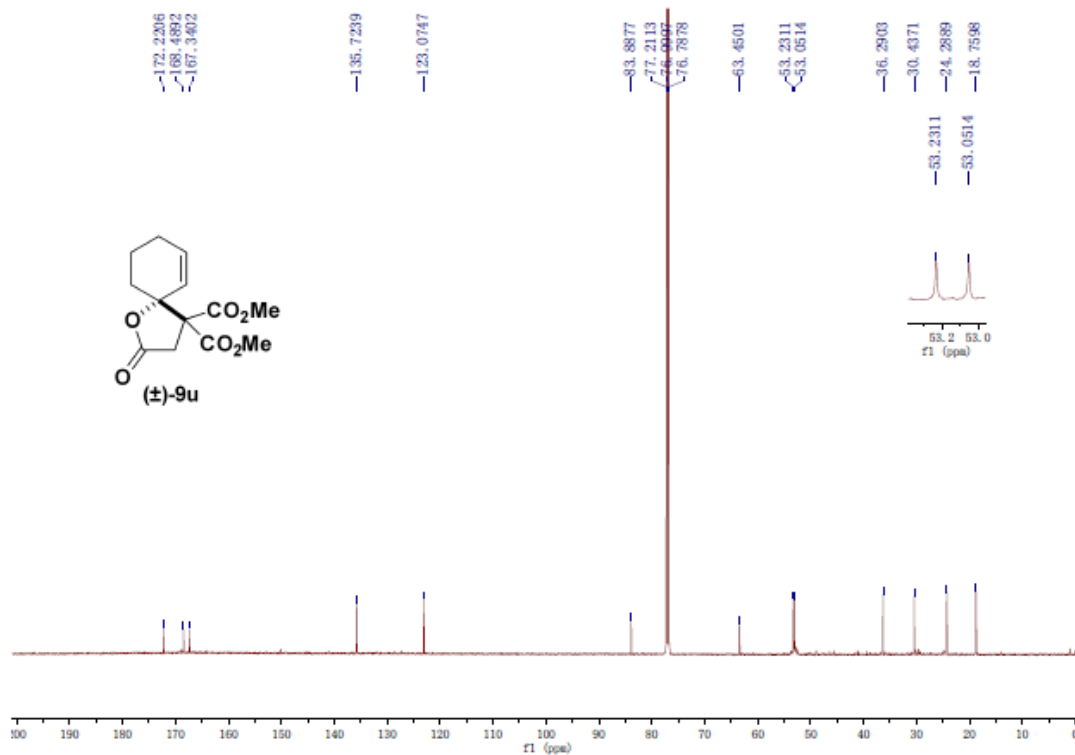



<sup>1</sup>H NMR of **18** (400 M, CDCl<sub>3</sub>)

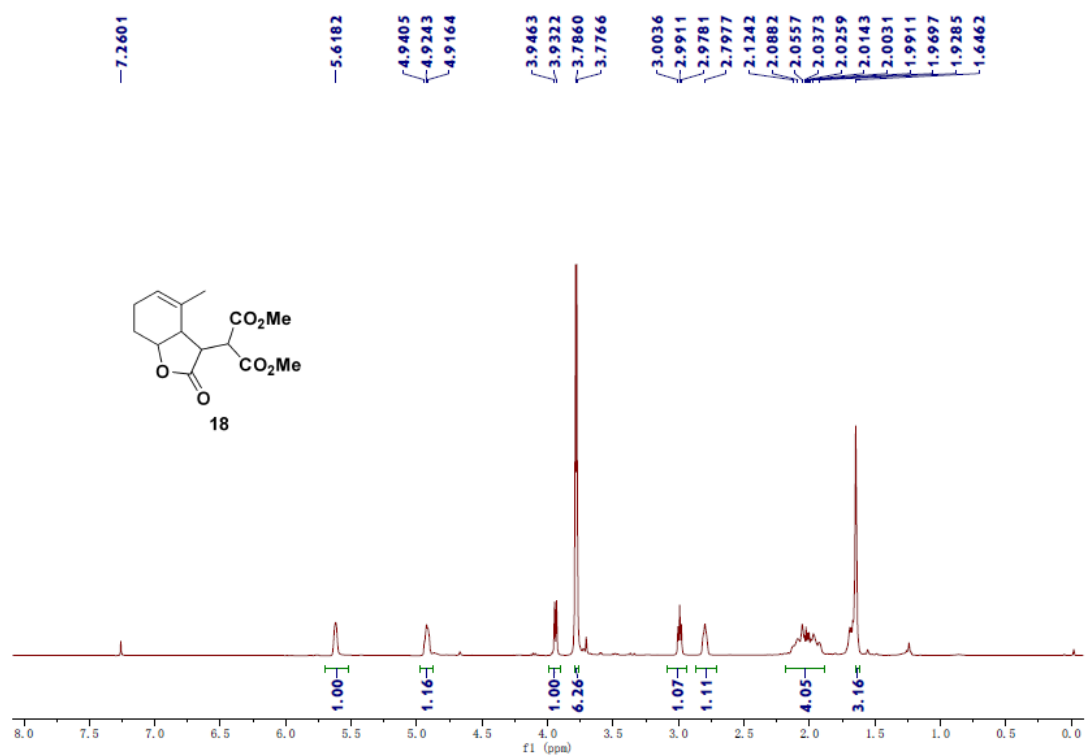

<sup>13</sup>C NMR of **18** (100 M, CDCl<sub>3</sub>)

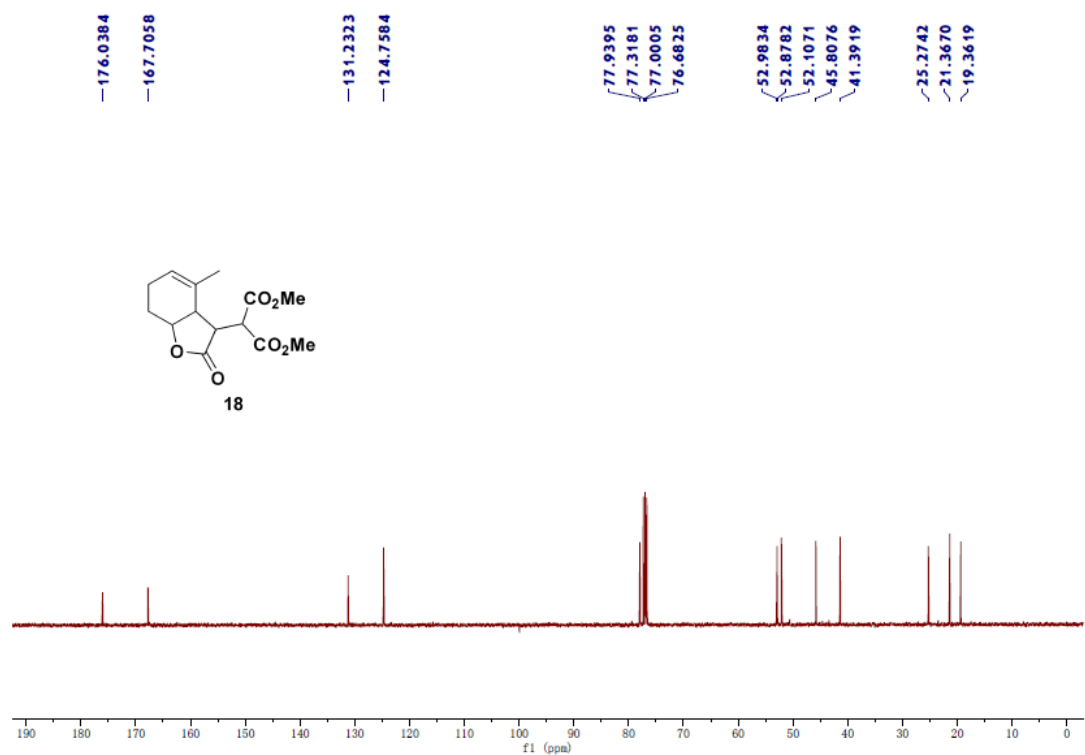

Supplement: d1qo01952j1.pdf [file d1qo01952j1.pdf]
